# Supplementary material for: Global Transcriptomic Changes Elicited by sodB Deletion and Menadione Exposure in Aspergillus nidulans
Source: MDPI journal article supplement (doi:10.3390/jof9111060), 2023-10-30
Supplement: s1 [file s1]

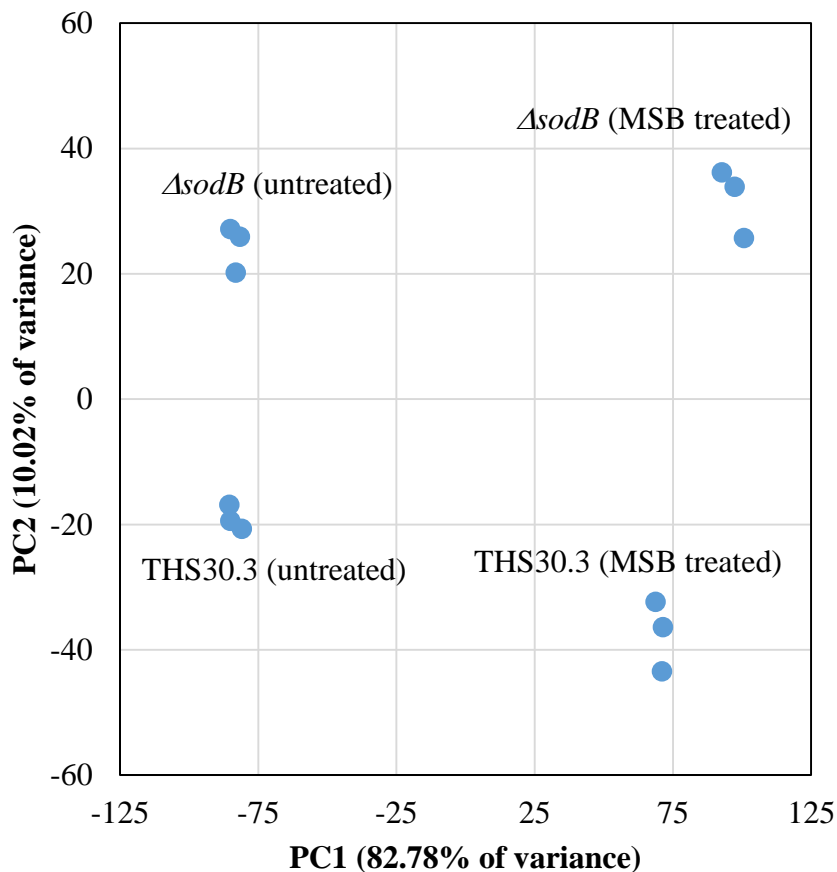

**Figure S1** Principal component (PC) analysis of the RNAseq data obtained from MSB treated and untreated cultures of the *A. nidulans* THS30.3 (reference strain) and *ΔsodB* mutant.

The analysis was carried out using the rlog data generated by the DESeq2 software.
