# Supplementary material for: Global Transcriptomic Changes Elicited by sodB Deletion and Menadione Exposure in Aspergillus nidulans
Source: J Fungi (Basel). 2023 Oct 30;9(11):1060. doi: 10.3390/jof9111060 (PMC10671992; doi:10.3390/jof9111060)
Supplement: Supplementary file 1 [file jof-09-01060-s001.zip]

Archive with 5 entries (5 files):
- Fig S1.pdf
- Table S1.xlsx
- Table S2.xlsx
- Table S3.xlsx
- Table S4.xlsx
