# Supplementary material for: Global Transcriptomic Changes Elicited by sodB Deletion and Menadione Exposure in Aspergillus nidulans
Source: J Fungi (Basel). 2023 Oct 30;9(11):1060. doi: 10.3390/jof9111060 (PMC10671992; doi:10.3390/jof9111060)
Supplement: Supplementary file 1 [file jof-09-01060-s001.zip › Table S1.xlsx]

## Sheet: RT-qPCR
	Table S1	RT-qPCR data of selected genes
	The supplementary material contains:		RT-qPCR data of the selected 13 genes
			Correlation data between the RT-qPCR (DDCP) and RNAseq (log2FC) data
			Sequences of the used primer pairs
			Transcriptional data of the selected AN9168 reference gene
	Gene ID	Gene name	RT-qPCR (DDCP)								RNAseq (log2FC)				Feature
			THS30.3: MSB treated vs. untreated		DsodB: MSB treated vs. untreated		Untreated: DsodB vs. THS30.3		MSB treated: DsodB vs. THS30.3		THS30.3: MSB treated vs. untreated	DsodB: MSB treated vs. untreated	Untreated: DsodB vs. THS30.3	MSB treated: DsodB vs. THS30.3
			Mean	SD	Mean	SD	Mean	SD	Mean	SD
	AN0241	sodA	2.71	0.907359	2.21	0.23516	0.103333	1.25149	-0.396667	1.06068	1.44334	1.5517	0.193531	0.301898	Superoxide dismutase [Cu-Zn]
	AN5577	sodB	2.58	0.512933	2.79333	0.478992	-8.83667	0.87134	-8.62333	0.362261	1.86532	0.10514	-14.7582	-16.5184	Superoxide dismutase [Mn]
	AN1131	sodC	-2.79667	0.96293	-1.75667	0.555008	-1.65667	1.35149	-0.616667	0.479305	-2.96894	-1.97447	-1.81054	-0.816068	Putative cytosolic Cu/Zn superoxide dismutase
	AN0785	sodM	0.7	0.559732	2.25333	1.67375	0.733333	1.16036	2.28667	0.395264	0.578407	-1.56617	1.74843	-0.396147	Putative manganese superoxide dismutase
	AN9339	catB	3.24667	0.111505	5.6	0.215174	-2.41333	0.780342	-0.06	0.779487	2.63718	4.71828	-1.06618	1.01492	Catalase B
	AN6542	actA	-0.606667	0.401539	0.336667	0.148436	-1.15667	0.79576	-0.213333	0.386566	-0.666786	-0.522395	-0.159691	-0.0152997	Gamma-actin
	AN3581	trxR	4.5	2.59931	7.05	4.07076	-1.475	0.898016	1.075	0.691544	4.44739	5.78332	-0.528114	0.807819	Thioredoxin reductase with a predicted role in pyrimidine metabolism
	AN2846	gpxA	5.40667	0.143643	4.89333	0.485833	-0.903333	0.928134	-1.41667	1.29932	5.78058	6.1065	0.241722	0.567645	Glutathione peroxidase, putative
	AN0447		3.02667	2.02082	2.88667	0.877629	0.23	0.753193	0.09	0.772528	2.68584	2.3261	0.693525	0.333785	Ortholog(s) have mitochondrion localization, Nfu_N domain-containing protein
	AN1800	tcsB	2.31333	0.980221	3.40667	1.29516	-0.923333	0.562257	0.17	0.816823	2.03079	2.87888	-0.399265	0.448824	Two-component system protein B
	AN3150	gGCS	1.80667	1.82015	2.14	0.694766	-2.59	1.16568	-2.25667	1.20176	2.53456	2.82182	-0.613039	-0.325785	Putative gamma-glutamylcysteine synthetase
	AN5823	sidA	1.065	6.36915	1.26333	4.3429	0.256667	2.8828	0.455	3.39877	-0.626197	-1.47124	1.0793	0.234253	L-ornithine N5-monooxygenase
	AN1628	enaB	-2.10667	1.38962	-1.53667	0.532572	-0.303333	1.34337	0.266667	1.07955	-2.56625	-2.76656	-1.10723	-1.30754	Sodium transport ATPase, putative
	Figures represent mean ± SD calculated from three biological replicates.
					Pearson's correlation coefficient (RNAseq vs. RT-qPCR)
							THS30.3 MSB treated vs. THS30.3untreated	0.968745
							DsodB MSB treated vs. DsodB untreated	0.889834
							DsodB untreated vs. THS30.3 untreated	0.955441
							DsodB MSB treated vs. THS30.3 MSB treated	0.900466
		Primer pairs used in the study
	AN0241	Forward:5’-CTTCCACATCCACCAGTTC-3’			Reverse:5’-CAGCGTTACCAGTCTTCTTG-3’
	AN5577	Forward:5’-CTTGCTTACGACTATGGCG-3’			Reverse:5’-GTTGATGGCTTTGGAGAGAG-3’
	AN1131	Forward:5’-CACCACGCTTCCCTTCTG-3’			Reverse:5’-CTCAAATCGCCAACCTCGC-3’
	AN0785	Forward:5’-ATGACCCTCCACCATCAAAA-3’			Reverse:5’-CCTCTACAGAGCCGAACTGG-3’
	AN9339	Forward:5’-CCGAGCCCGACAACACTTAC-3’			Reverse:5’-GTTCAGCGACGACAATGACG-3’
	AN6542	Forward:5’-GAAGTCCTACGAACTGCCTGATG-3’			Reverse:5’-AAGAACGCTGGGCTGGAA-3’
	AN3581	Forward:5’-TGGCAGAACGGTATCAGCG-3’			Reverse:5’-GCGGACAAGCACGGTAAC-3’
	AN2846	Forward:5’-TTACCAGTCCATCAAAGCCAAG-3’			Reverse:5’-TTCAGCCAAGTCCAAAGAGG-3’
	AN0447	Forward:5’-GACTTCCCTACCTCCTTCTTG-3’			Reverse:5’-GCTCCACTCTTTTCCACGG-3’
	AN1800	Forward:5’-TCATACAATCCGCCTTACAGC-3’			Reverse:5’-ATCCCAATCCTTCATCCCC-3’
	AN3150	Forward:5’-AGGAGGGAGGTAGCAAAAG-3’			Reverse:5’-CAGATGGAGGGTAATAAGGC-3’
	AN5823	Forward:5’-GCTTCACCTTCCTCAACTAC-3’			Reverse:5’-ACTTCAATCACCTCCTCTCC-3’
	AN1628	Forward:5’-TGTTGTCGGGTTCTTCCAGG-3’			Reverse:5’-AGGGCTTCATCGGTCTCG-3’
	AN9168	Forward:5’-GCTTACTGGGTCGTCTTC-3’			Reverse:5’-GCTGGTCTTGGTCATCTC-3’
		AN9168
		Sample	Cq	Mean	S.D.
		THS30.3 untreated 1	30.83	30.5733	0.607152
		THS30.3 untreated 2	29.88
		THS30.3 untreated 3	31.01
		THS30.3 MSB treated 1	31.42	31.6967	0.725695
		THS30.3 MSB treated 2	32.52
		THS30.3 MSB treated 3	31.15
		DgfdB untreated 1	29.63	30.5333	0.803886
		DgfdB untreated 2	31.17
		DgfdB untreated 3	30.8
		DgfdB MSB treated 1	31.03	31.7767	0.659571
		DgfdB MSB treated 2	32.28
		DgfdB MSB treated 3	32.02
			All	31.145	0.8616
