# Supplementary material for: Global Transcriptomic Changes Elicited by sodB Deletion and Menadione Exposure in Aspergillus nidulans
Source: J Fungi (Basel). 2023 Oct 30;9(11):1060. doi: 10.3390/jof9111060 (PMC10671992; doi:10.3390/jof9111060)
Supplement: Supplementary file 1 [file jof-09-01060-s001.zip › Table S2.xlsx]

## Sheet: Munka1
Table S2	Correlation between RNAseq and DNA chip data
Data of the A. nidulans THS30 strain (MSB treated cultures vs. Untreated cultures) obtained with RNAseq and DNA chip are compared.
DNA chip data:	GSE63019; Gene Expression Omnibus; GEO; http://www.ncbi.nlm.nih.gov/geo/
RNAseq data:	GSE244381; Gene Expression Omnibus; GEO; http://www.ncbi.nlm.nih.gov/geo/
GENE ID	Log2FC
	RNAseq	DNAchip		Pearson's correlation with all genes presented in both datasets:						0.733397
AN8433	-5.80543	-6.61825
AN2549	-4.81781	-6.16312
AN9380	-6.11557	-6.05435
AN6620	-5.53754	-5.92352
AN8218	-5.50457	-5.84261
AN8445	-6.18479	-5.76457
AN11981	-5.32658	-5.72115
AN8539	-7.71033	-5.67956
AN7214	-5.68943	-5.52835
AN5028	-5.6987	-5.16587
AN7181	-3.95016	-5.13202
AN0554	-3.1972	-5.05777
AN5373	-1.57039	-5.01501
AN2237	-4.73976	-5.01116
AN6525	-1.88347	-4.96253
AN5353	0.16179	-4.91464
AN3304	-4.52289	-4.89339
AN7159	-2.9836	-4.7032
AN8670	-2.78569	-4.65524
AN2547	-1.62281	-4.48131
AN5815	-2.35084	-4.45992
AN3303	-4.82979	-4.38425
AN2511	-2.36155	-4.38175
AN4008	-3.34765	-4.36028
AN5027	-3.2498	-4.35086
AN3124	-2.88358	-4.31345
AN0814	-3.25073	-4.28472
AN2646	-5.58766	-4.27565
AN3591	-1.26106	-4.27303
AN0457	-3.13902	-4.23094
AN8953	-5.83515	-4.20147
AN12336	-2.51468	-4.15312
AN4659	-2.13629	-4.128
AN1338	-2.81514	-4.10864
AN8661	-1.28692	-4.09082
AN0050	-3.31455	-4.08483
AN4163	-3.20709	-4.03945
AN3312	-2.86592	-4.0133
AN8782	-2.20285	-4.01198
AN3996	-2.08693	-3.97549
AN6438	-1.69775	-3.96649
AN1131	-2.96894	-3.95435
AN10602	-2.31892	-3.95387
AN5737	-1.38539	-3.9323
AN2054	-2.47785	-3.92591
AN2738	-3.81205	-3.90402
AN6863	-3.0109	-3.89421
AN2572	-4.51634	-3.85077
AN4394	-4.28129	-3.84432
AN3592	-3.00843	-3.83794
AN5687	-2.77378	-3.83687
AN7040	-3.11554	-3.83468
AN0055	-3.00342	-3.83362
AN6775	-2.98383	-3.82917
AN4683	-3.25953	-3.8215
AN6307	-2.88359	-3.81749
AN7679	-2.07811	-3.80653
AN0414	-2.84355	-3.79753
AN5331	-2.41291	-3.79211
AN4820	-2.17747	-3.7489
AN7632	-1.74331	-3.73703
AN3520	-5.21383	-3.73396
AN8979	-5.27269	-3.72384
AN7032	-2.2154	-3.72186
AN1291	-2.35659	-3.7216
AN1128	-2.92644	-3.71945
AN6340	-2.79597	-3.71933
AN5626	-1.76994	-3.70277
AN2923	-3.55273	-3.68818
AN3048	-3.57586	-3.6667
AN4594	-2.84937	-3.64737
AN8012	-3.88479	-3.64505
AN7539	-4.48444	-3.64027
AN5534	-2.19933	-3.63771
AN4223	-3.24191	-3.63346
AN1455	-2.15832	-3.61189
AN1142	-0.670837	-3.6091
AN3721	-3.58236	-3.59834
AN1088	-3.36644	-3.57229
AN10497	-4.12317	-3.55545
AN1103	-2.09776	-3.55404
AN5014	-3.17519	-3.55211
AN1520	-3.35177	-3.55134
AN3946	-3.01685	-3.55132
AN5984	-2.75719	-3.54986
AN0054	-2.48391	-3.53933
AN7532	-2.89579	-3.53902
AN5907	-1.58841	-3.5339
AN4687	-1.92047	-3.52713
AN3731	-3.06236	-3.52059
AN1723	-2.24601	-3.49355
AN6202	-2.8489	-3.49079
AN10087	-3.11835	-3.46487
AN6500	-2.334	-3.46152
AN0834	-3.00802	-3.43987
AN1947	-1.63589	-3.43261
AN8683	-2.33086	-3.40865
AN10614	-2.66101	-3.4084
AN3037	-3.23502	-3.40665
AN2647	-4.93035	-3.37744
AN7331	-0.600125	-3.37457
AN7668	-2.78474	-3.35485
AN10761	-0.438381	-3.34871
AN10399	-2.87056	-3.3382
AN4102	-2.0527	-3.33788
AN4864	-3.58146	-3.33602
AN0301	-3.5437	-3.33434
AN10137	-2.41896	-3.33063
AN3172	-3.03753	-3.31459
AN0228	-4.4967	-3.31314
AN11054	-1.7227	-3.30525
AN3573	-2.43079	-3.30233
AN5719	-3.00909	-3.30199
AN3733	-3.02609	-3.2877
AN0820	-3.68677	-3.28549
AN12335	-2.38533	-3.2829
AN0246	-2.47041	-3.27964
AN7594	-1.90776	-3.27212
AN0886	0.407274	-3.26886
AN3706	-2.51145	-3.26416
AN10652	-1.525	-3.26017
AN9465	-2.47534	-3.2554
AN10351	-1.72854	-3.2542
AN1394	-2.71051	-3.25061
AN6150	-3.30211	-3.2477
AN1814	-2.65864	-3.24349
AN0262	-2.49625	-3.23507
AN1271	-0.267544	-3.23388
AN7302	-1.55504	-3.23343
AN11166	-2.50477	-3.22553
AN7538	-2.63974	-3.22214
AN1918	-0.977896	-3.21055
AN11046	-2.6251	-3.21046
AN5977	0.414326	-3.20706
AN9497	-0.77545	-3.20217
AN4906	-2.97065	-3.19268
AN8647	-1.56216	-3.18923
AN11897	-1.95798	-3.18477
AN2847	-2.03026	-3.17772
AN0433	-2.72515	-3.1696
AN5996	-2.37557	-3.16754
AN5665	-3.03422	-3.1545
AN8932	-1.5929	-3.15296
AN12111	-3.86652	-3.15069
AN3085	-0.90474	-3.14349
AN7548	-2.9082	-3.14059
AN8187	-2.55215	-3.13883
AN2248	-0.80189	-3.13298
AN4803	-2.60467	-3.13292
AN5520	-2.71321	-3.12061
AN4317	-2.16472	-3.11798
AN0316	-3.37203	-3.11526
AN4494	-2.56989	-3.11302
AN1008	-0.637974	-3.10648
AN4148	-0.22076	-3.10121
AN2296	-2.69198	-3.07586
AN4222	-2.76796	-3.07554
AN11290	-2.00875	-3.07394
AN6015	-3.47243	-3.07066
AN8223	-0.909479	-3.07064
AN8500	-0.68481	-3.06876
AN10079	-1.22829	-3.06524
AN4556	-2.11074	-3.06177
AN4068	-3.8338	-3.05508
AN0048	-3.16656	-3.05226
AN1628	-2.56625	-3.05035
AN6271	-2.5325	-3.0503
AN3413	-2.59665	-3.04936
AN4475	-2.07176	-3.04148
AN6499	-1.65429	-3.03737
AN5222	-2.59652	-3.03683
AN0267	-1.58408	-3.03029
AN3026	-2.39685	-3.02144
AN5114	-2.93696	-3.00774
AN8005	-2.55253	-3.00319
AN9468	-2.48469	-3.00068
AN0404	-3.91274	-2.99736
AN5037	-4.04451	-2.99541
AN9414	-1.03992	-2.98892
AN1968	-3.22166	-2.98851
AN5997	-2.21887	-2.98838
AN7003	-2.73518	-2.98712
AN1182	-2.53001	-2.9868
AN11018	-2.56269	-2.9846
AN0163	-1.92161	-2.98326
AN3112	-2.92853	-2.9822
AN7140	-0.910962	-2.98076
AN0067	-2.44184	-2.97757
AN5862	-1.68234	-2.97159
AN4916	-2.48905	-2.96947
AN10755	-2.74912	-2.96844
AN5888	-3.30527	-2.96677
AN1012	-2.36361	-2.96165
AN5972	-1.63107	-2.95962
AN8913	-4.79578	-2.95751
AN5177	-2.89092	-2.95577
AN0338	-0.40118	-2.94684
AN2922	-2.55388	-2.94508
AN0954	-3.73158	-2.94486
AN0776	-2.4431	-2.9441
AN5979	-1.90506	-2.94299
AN8370	-2.82617	-2.94207
AN0051	-1.56053	-2.94005
AN8343	-1.80264	-2.93926
AN7710	-1.80901	-2.93922
AN3080	-2.60335	-2.93841
AN7354	-2.06253	-2.93718
AN3704	-1.86984	-2.93103
AN7251	-1.72526	-2.9285
AN8910	-6.91343	-2.92811
AN6629	-2.57048	-2.92761
AN6679	-2.31983	-2.922
AN4609	-1.40795	-2.9216
AN0465	-2.30146	-2.92028
AN10681	-2.23736	-2.91567
AN0481	-3.18248	-2.91265
AN6630	-1.97738	-2.90972
AN5558	-3.32202	-2.90059
AN10718	-1.64023	-2.89602
AN5487	-1.07187	-2.88966
AN2140	-1.89903	-2.88485
AN3820	-3.65358	-2.88436
AN2980	-1.94696	-2.88267
AN5992	-3.65617	-2.88199
AN5715	-1.92727	-2.87904
AN4077	-2.77623	-2.87389
AN3482	-5.27339	-2.87384
AN0052	-0.729288	-2.87112
AN5975	-1.86076	-2.86946
AN5441	-2.33081	-2.86408
AN2687	-1.35021	-2.85856
AN4595	-2.51704	-2.85837
AN7177	-3.59033	-2.85779
AN7773	-3.7606	-2.85757
AN6518	-1.38257	-2.85517
AN4060	-2.36369	-2.84572
AN6632	-2.14702	-2.84377
AN5226	-2.06276	-2.84294
AN2968	-1.4267	-2.83991
AN6382	-2.58009	-2.83552
AN3067	-2.93864	-2.83517
AN10710	-1.63741	-2.83171
AN7107	-2.27265	-2.82904
AN2545	-1.76128	-2.82757
AN9273	-2.38426	-2.82012
AN4453	-1.70794	-2.81951
AN2702	-1.88109	-2.81671
AN2529	-0.606006	-2.81636
AN2734	-3.14943	-2.81395
AN5168	-1.77528	-2.80807
AN11797	-1.44915	-2.80591
AN7426	-2.63873	-2.80352
AN4794	-2.36117	-2.80237
AN1962	-3.69966	-2.80134
AN1053	-2.0366	-2.80096
AN1166	-2.13143	-2.80074
AN7263	-1.96784	-2.80049
AN2275	-2.60365	-2.79887
AN1560	-2.01367	-2.78986
AN1117	-1.84759	-2.78523
AN4202	-2.12989	-2.78408
AN10416	-2.21646	-2.78301
AN3419	-2.35311	-2.78035
AN1953	-3.14517	-2.77843
AN0610	-1.70649	-2.77479
AN7798	-6.3894	-2.76879
AN4087	-2.00731	-2.76861
AN12246	-2.03939	-2.76833
AN10905	-2.90552	-2.76664
AN6418	-4.53679	-2.76511
AN2727	-3.69651	-2.76312
AN1392	-1.28992	-2.76216
AN4787	-2.0475	-2.75779
AN0860	-0.813827	-2.75379
AN2017	-1.62218	-2.75132
AN0417	-2.58897	-2.75008
AN2366	-2.23763	-2.74786
AN9289	-2.70974	-2.74671
AN1154	-1.70725	-2.74666
AN3043	-2.38963	-2.74609
AN6181	-1.79446	-2.74527
AN1228	-2.10812	-2.74242
AN4706	-2.17276	-2.74225
AN6257	-2.12539	-2.73595
AN4802	-1.96485	-2.73417
AN3634	0.0673229	-2.72909
AN8496	-0.477697	-2.72826
AN7266	-1.53244	-2.71828
AN2128	-2.93231	-2.71721
AN7492	-1.59187	-2.71026
AN6823	-1.38494	-2.70982
AN7193	-1.55448	-2.70918
AN0570	-2.1594	-2.70727
AN3130	-0.802968	-2.70248
AN10648	-4.98733	-2.69634
AN0746	-0.616784	-2.69625
AN3598	-1.48507	-2.69464
AN2240	-1.14851	-2.69136
AN0843	-2.57025	-2.68403
AN8870	-1.86328	-2.67446
AN5057	-2.46857	-2.67199
AN4513	-2.53238	-2.66511
AN6168	-2.02227	-2.66437
AN0399	-2.69886	-2.66383
AN8931	-1.32708	-2.66379
AN9460	-1.59153	-2.66006
AN3489	-2.77983	-2.65699
AN4813	-2.38974	-2.65673
AN10700	-0.443703	-2.65341
AN9474	-0.550221	-2.65247
AN1964	-2.47032	-2.65145
AN8856	-2.41762	-2.64798
AN3855	-1.51983	-2.6465
AN1345	-2.14248	-2.64596
AN8540	-3.04363	-2.64381
AN5810	-1.57791	-2.64282
AN7280	-6.41903	-2.64077
AN4235	-1.47155	-2.63529
AN6285	-1.99473	-2.63393
AN7307	-1.59054	-2.63276
AN1322	-1.42728	-2.63091
AN10702	-1.33659	-2.62827
AN0905	-3.03707	-2.62297
AN5960	-2.69516	-2.61978
AN12180	-1.65078	-2.61828
AN10311	-2.45389	-2.61651
AN4396	-1.11722	-2.61483
AN11411	-1.67018	-2.61316
AN2912	-0.808647	-2.61263
AN7721	-2.08849	-2.60697
AN12088	-2.39273	-2.60545
AN11419	-1.73113	-2.60212
AN2916	-1.55706	-2.5978
AN4522	-1.92197	-2.59771
AN0077	-1.25488	-2.59708
AN8704	-2.10027	-2.59389
AN4769	-1.86514	-2.58998
AN8194	-1.68789	-2.58923
AN11999	-1.67616	-2.58611
AN1122	-2.2928	-2.58349
AN5686	-1.84782	-2.57456
AN4792	-1.1911	-2.57439
AN9198	-1.45341	-2.57332
AN11853	-1.94502	-2.57326
AN11058	-1.2466	-2.57093
AN7491	-0.703901	-2.5705
AN5800	-2.27028	-2.5666
AN8193	-0.706066	-2.56499
AN8783	-2.73609	-2.55452
AN5422	-4.75056	-2.55411
AN0585	-5.66929	-2.55134
AN6565	-1.31049	-2.55019
AN2538	-3.60772	-2.5465
AN7472	-2.23765	-2.54476
AN4671	-2.13107	-2.53921
AN7471	-1.00162	-2.5375
AN4073	-2.09252	-2.53575
AN8559	-2.0417	-2.5357
AN5406	-2.64826	-2.53064
AN4667	-2.74291	-2.5262
AN2927	-2.20503	-2.52476
AN0203	-1.32826	-2.52119
AN8176	-2.55798	-2.52026
AN4902	-2.82469	-2.51889
AN6895	-1.90042	-2.51722
AN10795	-1.76474	-2.51368
AN1718	-2.44471	-2.50921
AN5437	-1.46751	-2.50797
AN1719	-2.69789	-2.50698
AN9496	-2.89256	-2.50616
AN6600	-2.66303	-2.50316
AN9481	-1.38822	-2.50175
AN6732	-1.42836	-2.49305
AN7435	-1.83695	-2.48409
AN10223	-1.62846	-2.47591
AN3823	-1.67435	-2.47016
AN4843	-0.445619	-2.46994
AN4446	-1.81633	-2.46964
AN0896	-1.35246	-2.46769
AN2733	-1.4233	-2.46603
AN0248	-2.76507	-2.46358
AN0759	-1.27219	-2.46126
AN5444	0.555616	-2.45864
AN6526	-1.87638	-2.45682
AN6064	-1.13084	-2.45422
AN10740	-2.17371	-2.45414
AN7296	-2.19736	-2.45343
AN3517	-4.41604	-2.45291
AN6621	-2.83375	-2.44993
AN0445	-2.3389	-2.44858
AN7301	-1.11402	-2.44842
AN2862	-2.37134	-2.4455
AN11111	-1.98437	-2.44056
AN5637	-1.13203	-2.4372
AN8746	-1.42242	-2.43472
AN7403	-3.53032	-2.4302
AN1905	-2.2071	-2.42937
AN1013	-2.33472	-2.42799
AN5770	-3.05702	-2.42563
AN4182	-1.67574	-2.42192
AN5674	-1.6422	-2.42189
AN2718	-2.65002	-2.41691
AN4547	-1.67601	-2.41636
AN9359	-2.11975	-2.41224
AN5730	-2.14028	-2.40913
AN2293	-1.17476	-2.40526
AN9295	-2.32201	-2.40422
AN7631	-1.70085	-2.40418
AN2762	-0.597174	-2.40087
AN1763	-1.21063	-2.40015
AN5852	-1.66147	-2.39771
AN10133	-1.73131	-2.39642
AN9444	-0.405186	-2.39537
AN2941	-2.44546	-2.3946
AN4282	-0.931195	-2.39434
AN4791	-2.08314	-2.39368
AN1519	-1.46194	-2.39037
AN6276	-1.14692	-2.38877
AN3590	-0.931678	-2.38769
AN2332	-1.2611	-2.38686
AN3114	-2.20447	-2.38483
AN10981	-0.25016	-2.38387
AN0676	-1.22339	-2.38224
AN10848	-4.6947	-2.37895
AN1177	-2.00711	-2.37828
AN4084	-2.02584	-2.37545
AN8024	-0.678159	-2.37473
AN6401	0.46063	-2.37343
AN4058	-0.261936	-2.36998
AN2876	-1.60697	-2.36847
AN7564	-1.00938	-2.36825
AN7162	-0.00513519	-2.36767
AN0907	-2.16404	-2.36688
AN6470	-2.01732	-2.36653
AN4957	-1.08645	-2.36306
AN0847	-1.81899	-2.35897
AN4872	-1.942	-2.35821
AN3331	-0.884384	-2.35781
AN0278	-1.26006	-2.35629
AN6838	-2.31445	-2.35426
AN9456	-5.60868	-2.35235
AN10743	-1.62557	-2.35215
AN10182	-2.99695	-2.34955
AN2062	-1.8669	-2.34518
AN3795	-3.11147	-2.33792
AN2004	-0.612462	-2.33622
AN0667	-1.37655	-2.33287
AN6180	-1.75423	-2.33204
AN8808	-1.97754	-2.32714
AN10090	-1.25713	-2.32615
AN7367	-1.7532	-2.32444
AN9097	-2.07924	-2.32014
AN6507	-2.31998	-2.31676
AN6075	-2.43917	-2.31478
AN10219	0.0423334	-2.31216
AN10418	-1.04473	-2.30955
AN10130	-1.76729	-2.30525
AN1690	-1.957	-2.30521
AN6383	-1.88808	-2.30437
AN8080	-1.15025	-2.30281
AN9377	-0.678534	-2.29794
AN5899	-1.19612	-2.29303
AN1638	-0.833257	-2.28814
AN4422	-1.16351	-2.28766
AN12404	-0.994776	-2.28371
AN7141	-0.90639	-2.27728
AN6159	-1.79021	-2.27688
AN0830	-1.38954	-2.27586
AN2866	-1.48912	-2.27515
AN5215	-2.9958	-2.26569
AN4467	-1.5906	-2.26525
AN0787	-1.08954	-2.26201
AN5048	-2.45714	-2.26128
AN2969	-2.10858	-2.25956
AN5676	-2.36322	-2.25864
AN6563	-2.93067	-2.25742
AN1006	-0.871448	-2.25707
AN4596	-1.37871	-2.25263
AN0418	-1.1058	-2.25132
AN4264	-1.45529	-2.25123
AN4735	-1.85496	-2.2506
AN2137	-2.07549	-2.24757
AN0579	-1.9855	-2.24654
AN6616	-1.20984	-2.2452
AN0991	0.523241	-2.24427
AN6221	-2.76732	-2.24238
AN6066	-0.518712	-2.24069
AN9094	-2.03478	-2.24048
AN6471	-3.10419	-2.23686
AN2490	-1.01918	-2.23412
AN2301	-1.60364	-2.23105
AN6682	-3.26062	-2.22763
AN1374	-1.04947	-2.22675
AN0593	-1.53815	-2.21172
AN4702	-1.98415	-2.21104
AN0851	-2.83881	-2.2107
AN3942	-2.15708	-2.20726
AN8063	-1.50162	-2.20514
AN1063	-1.17363	-2.204
AN4688	-2.42583	-2.20388
AN0131	-1.34667	-2.20376
AN3776	-1.77701	-2.2002
AN6214	-1.72528	-2.19963
AN1624	-2.0854	-2.19935
AN5484	-1.13321	-2.19656
AN10790	-1.82663	-2.19293
AN2044	-1.07581	-2.18833
AN3833	-2.03451	-2.18786
AN1851	-2.19092	-2.18707
AN8964	-3.73876	-2.18381
AN10078	-2.14211	-2.18354
AN3749	-2.83656	-2.18091
AN12204	-2.1911	-2.17857
AN2701	-1.50152	-2.17535
AN2133	-0.581095	-2.17521
AN2059	-2.88566	-2.17294
AN4904	-1.34792	-2.17204
AN2096	-1.25241	-2.17136
AN9113	-1.48601	-2.17122
AN6364	-1.42076	-2.17011
AN4521	-2.87584	-2.16955
AN0261	-1.53569	-2.16859
AN10061	-1.05307	-2.16495
AN6591	-2.44421	-2.16437
AN2686	-0.70196	-2.16256
AN5421	-4.73366	-2.16031
AN10258	-1.36994	-2.15956
AN0174	-2.61498	-2.15369
AN3606	-1.54575	-2.1471
AN3788	-0.626699	-2.13427
AN9434	-1.372	-2.13413
AN4186	-1.36101	-2.13078
AN10315	-2.21154	-2.12623
AN0665	-0.855204	-2.12593
AN9076	-2.61052	-2.12531
AN9001	-4.33244	-2.12284
AN0862	-1.85401	-2.12259
AN4685	-2.25162	-2.11585
AN4761	-2.13991	-2.11413
AN10395	-1.44131	-2.1125
AN8498	-0.356887	-2.11213
AN12400	-1.8141	-2.11192
AN7299	-1.06248	-2.10828
AN1956	-2.3583	-2.10652
AN2853	-0.377323	-2.1057
AN5833	-2.00487	-2.10497
AN4929	-0.097303	-2.09905
AN11226	-2.14964	-2.09544
AN8046	0.666441	-2.09544
AN1099	-2.21902	-2.09525
AN8069	-1.91447	-2.09511
AN2068	-2.11081	-2.08969
AN8602	-2.44025	-2.08876
AN8649	-1.61556	-2.08738
AN8781	-1.14827	-2.08187
AN2164	-0.672983	-2.08115
AN2023	-3.07066	-2.07885
AN11377	-1.39603	-2.0786
AN4250	-1.81431	-2.07687
AN3906	-1.90718	-2.07549
AN5926	-1.09747	-2.07503
AN4934	1.45945	-2.07303
AN7388	-1.22718	-2.072
AN10146	-1.43759	-2.06952
AN1689	-1.20506	-2.06799
AN4699	-2.15995	-2.06458
AN4377	-1.11715	-2.0556
AN0500	-3.21489	-2.05513
AN7044	-0.718213	-2.05445
AN2963	-1.24745	-2.05299
AN5134	-1.95449	-2.0529
AN0242	-2.17868	-2.04903
AN7074	-2.19252	-2.04844
AN4695	-1.76677	-2.04598
AN8213	-1.82805	-2.04099
AN6738	-2.48225	-2.04019
AN0179	-1.17562	-2.03792
AN9425	-0.29848	-2.03756
AN10621	-1.34366	-2.03701
AN6365	0.281019	-2.03651
AN7007	-2.22271	-2.03523
AN11778	-0.339654	-2.03255
AN8182	-2.42689	-2.02833
AN6300	-2.06207	-2.0259
AN7262	-2.517	-2.02342
AN9141	-1.78476	-2.02093
AN3639	-1.3869	-2.01817
AN6708	-1.99366	-2.01745
AN9090	-2.26652	-2.01731
AN10172	-0.86686	-2.01626
AN0260	-2.06531	-2.01621
AN1941	0.279773	-2.01468
AN3930	-2.19234	-2.01455
AN3033	-2.23696	-2.01337
AN3748	0.465135	-2.01078
AN1408	-2.57615	-2.01075
AN1708	-2.28664	-2.01046
AN0687	-1.93703	-2.00703
AN4580	-1.57308	-2.00651
AN8690	-0.905928	-2.00407
AN3431	0.157778	-2.00122
AN6650	-0.913697	-2.00103
AN7049	-1.74268	-2.00013
AN12044	-0.903697	-1.99569
AN1904	-1.22114	-1.99412
AN6016	-2.20309	-1.99363
AN0690	-0.0469921	-1.99305
AN9138	-0.526515	-1.99214
AN4288	-0.85193	-1.99021
AN4728	-1.24113	-1.98889
AN1513	-1.04601	-1.98761
AN7747	-1.08195	-1.9875
AN5495	-1.0158	-1.98543
AN11135	-1.32149	-1.98067
AN6723	-0.44061	-1.98059
AN2047	-0.845519	-1.97725
AN6643	-1.53059	-1.97723
AN4463	-1.22368	-1.9765
AN0357	-1.42012	-1.97229
AN0259	-1.75104	-1.96787
AN7108	-0.641345	-1.96771
AN6209	-2.37687	-1.96744
AN10872	-0.0424948	-1.96682
AN8290	-1.17977	-1.96486
AN11730	-1.40173	-1.96378
AN5939	-3.29951	-1.96238
AN6710	-0.977183	-1.96131
AN3941	-2.22098	-1.95956
AN4234	-1.20684	-1.95826
AN3481	-2.45534	-1.95813
AN4623	-1.97623	-1.95509
AN1463	-1.91491	-1.95485
AN11154	-1.21675	-1.95147
AN3158	-1.63464	-1.95021
AN2896	-0.594183	-1.9494
AN6080	-1.38775	-1.94902
AN7996	-1.13787	-1.94897
AN4042	-2.33943	-1.94815
AN1018	-1.48855	-1.94791
AN4959	-1.49481	-1.94788
AN2859	-1.95568	-1.94495
AN6187	-1.92031	-1.94135
AN2102	-1.39465	-1.9404
AN1929	-2.66403	-1.94015
AN4023	-0.912956	-1.93854
AN5895	-1.39492	-1.9358
AN4265	-1.40011	-1.93545
AN10007	-0.617307	-1.93484
AN4284	-0.545256	-1.93372
AN2510	-2.04278	-1.93337
AN2577	-1.4124	-1.93117
AN12461	-2.04832	-1.93085
AN6288	-0.878215	-1.92967
AN0704	-1.49406	-1.92912
AN0381	-2.39268	-1.92878
AN8795	-1.55523	-1.92703
AN10583	-2.88923	-1.92632
AN1920	-3.98275	-1.92253
AN6362	-1.01385	-1.92233
AN5672	-1.37403	-1.92146
AN0271	-1.83144	-1.92097
AN4027	-2.02629	-1.92038
AN10188	-1.39217	-1.91625
AN6885	-1.05997	-1.91566
AN1238	-2.38694	-1.91413
AN1159	-0.769213	-1.91371
AN12099	-2.2209	-1.90867
AN4031	-0.884503	-1.90864
AN3867	-1.44403	-1.90056
AN1911	-1.52031	-1.89668
AN11753	-0.862312	-1.89505
AN3345	-3.00388	-1.89499
AN4836	-1.69925	-1.89434
AN10108	0.533683	-1.89349
AN2458	-0.356527	-1.89034
AN5952	-0.660142	-1.88926
AN6557	-0.750127	-1.88878
AN0575	-2.31751	-1.88759
AN5575	-1.63395	-1.88515
AN0420	-1.88933	-1.88461
AN6224	-0.474704	-1.88332
AN3134	-2.26207	-1.8805
AN5909	-1.36387	-1.879
AN7731	-1.04951	-1.87826
AN11280	-2.26363	-1.87605
AN5591	-2.20212	-1.87573
AN3070	-2.03871	-1.87482
AN5679	-0.763761	-1.8734
AN10054	-0.972402	-1.87259
AN10439	-1.34358	-1.87196
AN1660	-2.66653	-1.87015
AN6517	-1.42768	-1.86795
AN3461	-1.271	-1.86572
AN4024	-1.05432	-1.86486
AN5033	-2.05634	-1.86455
AN8056	-1.2836	-1.86221
AN4550	-0.824002	-1.86024
AN5067	-2.50096	-1.85807
AN4303	-0.125351	-1.85749
AN8877	-2.28754	-1.85743
AN11005	-1.459	-1.85636
AN7493	-2.33669	-1.85533
AN0655	-1.26101	-1.85459
AN10122	-1.06229	-1.85391
AN0112	-1.18447	-1.85251
AN7776	-0.790615	-1.85167
AN3599	-0.444265	-1.85097
AN3910	-1.78806	-1.84977
AN9186	-1.50518	-1.84941
AN9086	-0.641136	-1.84923
AN1679	-2.92922	-1.84826
AN6115	-1.9231	-1.8476
AN2060	0.530566	-1.84699
AN5717	-2.01355	-1.84649
AN2433	-0.956975	-1.84607
AN3648	-1.11945	-1.84372
AN1780	-0.615675	-1.84045
AN7387	-0.681297	-1.83743
AN8045	-0.839579	-1.83656
AN4597	-1.23404	-1.83084
AN3916	-1.8171	-1.82993
AN3720	-1.43115	-1.82837
AN1805	-0.359355	-1.82701
AN10112	-2.07406	-1.82525
AN4947	-0.823247	-1.8227
AN9392	-0.555907	-1.82237
AN2151	-2.96324	-1.822
AN2457	-2.64073	-1.82183
AN5400	-1.60622	-1.82141
AN5424	-6.25364	-1.82091
AN2043	-1.7004	-1.81965
AN7146	-2.51645	-1.81826
AN6688	-2.02562	-1.81799
AN11081	-1.30706	-1.8163
AN4860	-1.60415	-1.81604
AN7231	-1.36924	-1.81071
AN7480	-2.61049	-1.81039
AN12205	-1.60384	-1.81026
AN1409	-2.03693	-1.80993
AN8902	-2.27266	-1.80865
AN3036	-0.536757	-1.8074
AN6068	-0.777288	-1.80626
AN6503	-0.940224	-1.80486
AN2112	-2.36362	-1.80288
AN2907	-2.71151	-1.80281
AN0166	-0.654317	-1.80108
AN0779	-2.24871	-1.80083
AN6584	-0.975166	-1.79931
AN2435	-2.60393	-1.79153
AN0804	-2.71448	-1.79123
AN4908	-2.42174	-1.79078
AN2962	-0.554528	-1.78937
AN2954	-1.44309	-1.78913
AN2126	-0.243527	-1.78825
AN3638	-0.801445	-1.78621
AN6717	-0.923552	-1.78585
AN10855	-2.16689	-1.78415
AN8396	-1.56396	-1.77982
AN1009	-2.43651	-1.77962
AN2334	-2.46447	-1.77782
AN1370	-2.03812	-1.77564
AN2588	0.0825303	-1.77394
AN5658	-0.104068	-1.77249
AN9446	-3.08533	-1.77155
AN1187	-1.25028	-1.76345
AN1204	-0.683824	-1.75856
AN11062	-1.97117	-1.75851
AN1011	-0.698879	-1.75784
AN3739	-1.2994	-1.75726
AN7436	-1.56241	-1.75557
AN12428	-2.63032	-1.7551
AN6261	-1.94691	-1.75438
AN10002	-2.56109	-1.74944
AN1579	-2.5862	-1.74724
AN0922	-1.39664	-1.7458
AN2989	-0.808392	-1.74443
AN1152	-0.41011	-1.74363
AN3055	-2.81971	-1.74194
AN6070	-3.08514	-1.74147
AN5688	-1.46142	-1.74114
AN8980	-6.84386	-1.73983
AN4198	-3.88315	-1.73959
AN2858	-1.9185	-1.73903
AN4992	-0.848117	-1.73881
AN4752	-1.52634	-1.73757
AN4069	-1.02703	-1.73724
AN3351	-2.90707	-1.73655
AN2532	-0.469707	-1.73215
AN3799	-1.73689	-1.73125
AN9006	0.695819	-1.73125
AN4064	-2.05097	-1.72848
AN6341	-1.8925	-1.72475
AN7116	-8.0745	-1.72457
AN7048	-0.920299	-1.72214
AN10570	-1.09723	-1.72142
AN10470	-2.20176	-1.72051
AN10762	-1.0071	-1.71902
AN5055	-2.49425	-1.71815
AN1980	-1.43627	-1.71654
AN5020	-2.03813	-1.71596
AN11007	1.69794	-1.7119
AN11841	-4.06907	-1.71176
AN2557	-1.47049	-1.70772
AN2878	-1.51404	-1.70334
AN3453	-1.3251	-1.70137
AN3957	-1.26869	-1.70112
AN3122	-1.15946	-1.69516
AN1286	-1.63141	-1.69301
AN3956	-2.38394	-1.69259
AN1222	-1.7158	-1.69208
AN10472	-1.8292	-1.69174
AN4092	-1.77053	-1.69105
AN10882	-1.84502	-1.69079
AN5713	-2.1854	-1.69077
AN0348	-2.12719	-1.69027
AN8497	-0.261569	-1.68981
AN0456	-1.44583	-1.68727
AN2050	-0.98425	-1.68685
AN8612	-0.132878	-1.68657
AN6170	-1.77283	-1.68641
AN2899	-1.73704	-1.68512
AN3673	-0.673553	-1.684
AN1688	-1.31734	-1.68378
AN2387	-2.35805	-1.68058
AN8209	-1.12306	-1.67963
AN1472	-1.70224	-1.6796
AN4293	-1.81642	-1.67733
AN10300	-0.363269	-1.677
AN12343	-1.19948	-1.66968
AN0680	-1.0919	-1.66891
AN1525	-1.10641	-1.66778
AN6145	-0.284726	-1.66645
AN6327	-1.84549	-1.66621
AN5954	-3.42799	-1.66273
AN5221	-1.32928	-1.66122
AN10225	-1.31533	-1.65969
AN8730	-4.31106	-1.65545
AN3226	-0.645715	-1.65533
AN8867	-0.694604	-1.65389
AN11720	-1.05981	-1.65328
AN2479	-0.396848	-1.65322
AN7121	-4.01628	-1.65216
AN3529	-3.50843	-1.65206
AN6162	-2.97274	-1.65182
AN3652	-2.16018	-1.65063
AN0822	-2.11661	-1.65021
AN0193	-1.05595	-1.64924
AN10917	-1.99536	-1.64563
AN8432	0.799958	-1.64464
AN7264	-1.88994	-1.64448
AN2735	-2.23744	-1.64395
AN11032	-2.85122	-1.64389
AN8777	1.20839	-1.64306
AN8727	-0.946271	-1.64184
AN5415	-1.67077	-1.63944
AN7635	-0.23445	-1.63567
AN0130	-1.91314	-1.63536
AN7027	-1.65666	-1.63506
AN8609	-1.97526	-1.63437
AN1769	-1.08151	-1.63411
AN8707	-1.06615	-1.63365
AN7268	-0.897997	-1.63305
AN11064	-1.1341	-1.63133
AN2407	-3.01877	-1.63071
AN5488	-0.264419	-1.62728
AN8049	-0.77304	-1.62468
AN5563	0.338751	-1.62351
AN3702	-1.14834	-1.6231
AN5703	-1.04752	-1.62266
AN6291	-2.10588	-1.622
AN6896	-3.25108	-1.62136
AN0063	-0.672913	-1.62112
AN4201	0.201002	-1.62076
AN7325	-1.41713	-1.61926
AN0753	-2.52162	-1.61766
AN10249	-1.4728	-1.61723
AN7222	-0.790629	-1.61393
AN10478	-1.82529	-1.61359
AN6900	-0.303081	-1.61313
AN2497	-1.37074	-1.61177
AN6696	-2.61085	-1.6109
AN3040	-0.968798	-1.60978
AN0126	-2.17256	-1.6096
AN0270	0.17904	-1.60814
AN4593	-0.788212	-1.60805
AN8129	-1.91942	-1.60778
AN12158	-1.23753	-1.60693
AN6729	-1.63491	-1.60625
AN1833	-2.83474	-1.60526
AN6904	-1.97973	-1.60437
AN6815	-0.0359763	-1.6042
AN2466	-2.06899	-1.60167
AN10354	-0.16811	-1.60162
AN6624	-1.17573	-1.60133
AN7170	0.236982	-1.60108
AN4016	-1.24088	-1.60016
AN11960	-1.28335	-1.59844
AN3171	-1.84407	-1.59806
AN6606	-0.967987	-1.59677
AN6413	-1.7713	-1.59648
AN7239	-2.92224	-1.59523
AN1439	-1.17906	-1.5949
AN1139	-1.54836	-1.59473
AN11882	0.204348	-1.5942
AN1710	-2.02006	-1.59397
AN6804	-0.720277	-1.59304
AN9064	-1.36577	-1.59238
AN3589	-1.78955	-1.59231
AN1007	-0.602916	-1.59223
AN2149	-1.86252	-1.59008
AN0883	-1.15011	-1.58998
AN2222	-2.13573	-1.5891
AN12403	-1.44745	-1.58785
AN0118	-2.26365	-1.58626
AN11982	0.0857825	-1.58626
AN10560	-2.03435	-1.58618
AN8216	-1.15853	-1.58617
AN6118	-2.29325	-1.58225
AN7201	-3.49767	-1.57977
AN6399	-0.0585665	-1.57934
AN0540	-2.7499	-1.57729
AN2315	-1.47039	-1.57729
AN4009	-1.71369	-1.57631
AN1661	-1.02874	-1.57565
AN6556	-3.28898	-1.57545
AN1282	-1.4772	-1.57491
AN3988	-1.30634	-1.57459
AN0626	-0.564793	-1.57378
AN0327	-1.27771	-1.5722
AN8084	-3.24848	-1.57045
AN5753	-1.16813	-1.56975
AN10437	-0.712977	-1.56942
AN5403	-1.1695	-1.56858
AN1426	0.859359	-1.56833
AN1674	-1.43554	-1.56756
AN8660	-0.776552	-1.56468
AN7580	-1.0752	-1.56446
AN4054	-1.33872	-1.56269
AN12054	-1.3839	-1.56209
AN4347	-2.29852	-1.56145
AN4193	-1.22275	-1.56008
AN7464	-2.11066	-1.55968
AN4855	-1.19242	-1.55864
AN0775	0.114349	-1.55809
AN0083	-0.92437	-1.55683
AN4530	-0.133942	-1.55454
AN2913	1.70641	-1.55284
AN2947	-0.326395	-1.55078
AN7553	-1.79977	-1.55007
AN0150	-2.31119	-1.54676
AN5749	0.0526881	-1.54436
AN2160	-2.48981	-1.5441
AN6653	0.893559	-1.54399
AN7994	-3.72262	-1.54324
AN1233	-1.69978	-1.54258
AN7733	-1.12027	-1.54256
AN1277	-1.06388	-1.53934
AN0606	-2.32637	-1.53919
AN5467	-3.62304	-1.53872
AN12027	-0.0547869	-1.53862
AN10851	-1.99797	-1.53682
AN3778	-0.5812	-1.53653
AN0249	-0.664362	-1.53595
AN5169	-1.12601	-1.53555
AN8214	-2.13281	-1.5344
AN5347	-1.24159	-1.53157
AN5746	-0.982551	-1.53156
AN10873	0.0144775	-1.53021
AN10441	-0.256977	-1.5301
AN4948	-1.28375	-1.52957
AN8283	-1.40188	-1.52918
AN2998	-0.943422	-1.52828
AN3814	-0.727624	-1.5252
AN10606	-0.671967	-1.52485
AN4949	-1.15952	-1.52407
AN11869	-0.207815	-1.52258
AN11908	-0.660629	-1.52232
AN2148	-1.15755	-1.52085
AN4464	-1.16937	-1.52049
AN10927	-1.42436	-1.5202
AN10639	-1.1931	-1.51929
AN12124	-1.54257	-1.51865
AN0798	-2.00211	-1.51594
AN2997	-2.35792	-1.51264
AN5644	-1.23708	-1.5113
AN1205	-2.16429	-1.51074
AN7678	-3.36976	-1.5107
AN2918	-1.76156	-1.51025
AN4859	-0.00145629	-1.50884
AN2314	-0.308895	-1.5082
AN4025	-2.14257	-1.50712
AN10326	-1.12028	-1.5068
AN3620	-1.56188	-1.50466
AN8968	0.05926	-1.50461
AN5580	-1.00608	-1.50319
AN9294	-1.19784	-1.50304
AN8793	-0.848155	-1.50295
AN1015	-0.569002	-1.50274
AN12042	-0.763649	-1.5026
AN2305	-0.120998	-1.50248
AN1849	0.00324462	-1.49778
AN10765	-2.35947	-1.49636
AN3843	-0.781839	-1.49564
AN0221	-1.95425	-1.49399
AN0849	-0.945386	-1.49321
AN4555	-2.02729	-1.49311
AN10118	-2.66021	-1.49294
AN0211	-1.81809	-1.49235
AN4085	-0.385538	-1.4895
AN10465	-1.42867	-1.48882
AN10801	-1.29931	-1.48787
AN2295	-1.18896	-1.48517
AN2249	-1.23561	-1.48485
AN2924	1.01518	-1.4848
AN6727	-1.98368	-1.48421
AN7715	-0.135815	-1.48278
AN6077	-1.02005	-1.48153
AN4332	-1.19667	-1.47879
AN8013	-1.81088	-1.47648
AN1165	-2.23379	-1.47648
AN0723	-1.06583	-1.47441
AN6191	-1.00933	-1.47354
AN3363	-0.470673	-1.4725
AN6583	-1.08904	-1.47176
AN8274	-1.50267	-1.47175
AN4301	-0.601863	-1.47172
AN3925	-1.15674	-1.47009
AN9005	1.33412	-1.46889
AN7385	-0.535035	-1.46728
AN2726	-2.92301	-1.46687
AN4990	-0.389023	-1.46588
AN11500	-0.723705	-1.46513
AN0937	-0.515344	-1.46243
AN4245	-0.0448716	-1.46083
AN8982	-2.11193	-1.45595
AN6188	-1.41382	-1.45566
AN10429	-1.75831	-1.45536
AN1169	-1.86608	-1.45481
AN4713	-1.00302	-1.45424
AN7340	-1.18901	-1.45389
AN4708	-2.76962	-1.44971
AN0576	-0.892177	-1.4492
AN0463	-2.38703	-1.4485
AN5000	-1.73926	-1.44477
AN2491	-4.48673	-1.4438
AN3840	-0.863892	-1.4438
AN6564	-1.88497	-1.44363
AN7570	-1.00649	-1.43897
AN1288	-2.64456	-1.43851
AN7016	-1.37382	-1.43778
AN7998	-0.994525	-1.43646
AN9103	-0.166044	-1.43589
AN5971	-0.570715	-1.43585
AN5767	-0.577155	-1.43578
AN2069	-0.786188	-1.43317
AN4964	-1.40863	-1.43294
AN4414	-1.59039	-1.43259
AN8240	-1.39814	-1.43199
AN0290	0.0980522	-1.43181
AN6314	-1.022	-1.43154
AN0715	-1.20872	-1.42659
AN7008	0.00861527	-1.42529
AN0359	-2.829	-1.42428
AN4777	-0.989722	-1.42345
AN5290	-2.57435	-1.42249
AN0108	-0.914587	-1.42231
AN0657	-0.561672	-1.4216
AN7265	-0.823072	-1.42049
AN3944	-2.92067	-1.42028
AN6035	-1.25236	-1.41991
AN10164	-2.14419	-1.41926
AN0764	-0.696673	-1.41921
AN8605	-0.282599	-1.41799
AN2272	-0.233182	-1.41782
AN3826	-1.43312	-1.4175
AN10971	-0.923414	-1.41689
AN6589	-1.22651	-1.41446
AN3577	-0.296859	-1.41302
AN8536	-1.94101	-1.41136
AN8085	-3.44981	-1.41085
AN3374	-2.0256	-1.40973
AN5986	-1.13093	-1.40942
AN10482	-0.602054	-1.40768
AN6548	0.364803	-1.40753
AN0590	-1.4081	-1.40737
AN1551	-1.50972	-1.40701
AN4300	-0.904118	-1.40578
AN0558	-1.65017	-1.40481
AN4664	-2.22497	-1.40444
AN0774	-0.901115	-1.40364
AN1194	-0.331197	-1.40362
AN2597	-2.92667	-1.40341
AN10558	-2.22704	-1.40302
AN1263	-1.37523	-1.40288
AN3667	-4.26138	-1.40265
AN11063	-0.801862	-1.40243
AN4589	-1.00327	-1.40131
AN6176	0.274972	-1.40094
AN6655	-1.20307	-1.39961
AN1673	0.18982	-1.39923
AN2446	0.164419	-1.3989
AN1342	-0.136047	-1.396
AN3133	-1.21074	-1.39585
AN4196	-1.07739	-1.39548
AN10193	-0.257548	-1.39247
AN5115	-1.11326	-1.39211
AN8957	-3.72067	-1.39095
AN7568	-1.02551	-1.39056
AN10126	-1.52744	-1.39027
AN5828	0.106603	-1.38836
AN3185	-1.29546	-1.38761
AN0471	0.2069	-1.38668
AN6554	-1.85766	-1.38588
AN7707	-0.770894	-1.38547
AN1424	-0.919799	-1.38499
AN7389	-3.09747	-1.38358
AN2081	-0.567753	-1.38112
AN5007	-2.40609	-1.38058
AN2464	-2.77635	-1.38011
AN5664	-1.4969	-1.37972
AN7289	-0.665673	-1.37936
AN9069	-2.71423	-1.37854
AN6909	-0.710204	-1.37829
AN6930	-1.22253	-1.37522
AN1779	-0.671209	-1.37144
AN10359	-1.5189	-1.37138
AN11168	-0.297657	-1.37071
AN10832	-1.38511	-1.369
AN0326	-1.15123	-1.36811
AN3100	-1.78911	-1.36762
AN5618	-0.925969	-1.36581
AN7541	-3.96318	-1.36547
AN1533	-3.04993	-1.36455
AN5850	-1.44164	-1.36404
AN0104	-1.13533	-1.36391
AN0943	-0.814653	-1.36208
AN3757	-0.0310519	-1.36038
AN5673	-1.71305	-1.35999
AN5763	-0.99533	-1.35982
AN3674	-2.66846	-1.35959
AN11713	-0.731492	-1.35756
AN1230	-0.928234	-1.35737
AN1640	-1.60964	-1.35681
AN4510	-1.0494	-1.35674
AN2983	-3.6074	-1.35667
AN5597	-1.0086	-1.35567
AN10335	0.0998975	-1.35561
AN7182	-1.94214	-1.35441
AN6345	-1.17137	-1.3533
AN0311	-0.72032	-1.35325
AN0882	-0.716967	-1.35319
AN8631	-1.39959	-1.35073
AN3829	0.543886	-1.35003
AN0076	-0.366803	-1.34989
AN1864	-1.23866	-1.34828
AN12062	0.28585	-1.34759
AN2452	-1.04147	-1.34664
AN0942	-0.660702	-1.34646
AN10170	-1.60445	-1.34335
AN6739	-2.12086	-1.34303
AN1726	-0.693136	-1.34216
AN3451	-0.414847	-1.34187
AN4195	-0.909896	-1.34169
AN0539	-1.87255	-1.34112
AN3789	-0.591138	-1.34073
AN9323	-0.775658	-1.34005
AN7338	-1.79991	-1.33971
AN4958	-1.67975	-1.33893
AN1549	-0.128182	-1.33854
AN1502	-1.05541	-1.33785
AN11117	0.225506	-1.33755
AN1119	-0.934052	-1.33709
AN0229	-0.874476	-1.33701
AN6330	-0.876453	-1.33588
AN9093	-2.26107	-1.33559
AN0362	-0.0294664	-1.33543
AN2317	-0.258414	-1.33372
AN2138	-1.56932	-1.33367
AN10169	-2.25395	-1.33223
AN8064	1.14061	-1.33158
AN4602	-1.16766	-1.33116
AN10474	-1.09296	-1.33043
AN3187	-0.566802	-1.32969
AN2157	-1.00647	-1.32964
AN1234	-1.21311	-1.32832
AN3095	-0.526245	-1.32625
AN10082	-1.50535	-1.32305
AN1775	-1.72136	-1.32281
AN5102	-1.57182	-1.32218
AN8040	-0.858199	-1.32026
AN4998	-1.2884	-1.31936
AN6785	-2.44606	-1.3192
AN5274	-0.843608	-1.31809
AN4967	-0.934048	-1.31807
AN2436	-2.74348	-1.31771
AN4942	-0.756184	-1.31697
AN10712	-2.4265	-1.31491
AN4402	-0.974048	-1.31483
AN7267	-1.40309	-1.31394
AN11894	0.160578	-1.31354
AN2250	-1.87653	-1.31238
AN4532	-0.796052	-1.31136
AN5408	-2.14206	-1.31009
AN11132	-2.14042	-1.30907
AN0848	-1.00144	-1.30879
AN6082	-1.01142	-1.30843
AN2921	-3.31946	-1.30795
AN5902	-0.259164	-1.30714
AN2772	-1.60171	-1.30703
AN7041	-0.857848	-1.30668
AN11141	-1.38456	-1.30616
AN0936	-0.918841	-1.30561
AN1265	-1.30565	-1.30493
AN1847	-0.201161	-1.30358
AN4082	-0.465444	-1.30234
AN4011	-1.11008	-1.30021
AN2431	-2.15338	-1.29958
AN3276	-0.953042	-1.29956
AN5596	-0.575056	-1.29887
AN0117	-0.503185	-1.29754
AN0409	-0.979392	-1.2957
AN0910	-1.74365	-1.2953
AN2318	-1.89804	-1.29341
AN2007	-1.03898	-1.29332
AN5647	-1.60068	-1.29259
AN5762	-1.26311	-1.29242
AN2565	-2.04457	-1.29109
AN4979	-0.539205	-1.29085
AN5005	-3.25006	-1.28994
AN7770	-0.217155	-1.28938
AN5133	-1.36973	-1.28735
AN8669	0.025294	-1.28479
AN1912	-0.0835497	-1.28312
AN7204	-4.99195	-1.28299
AN5648	-2.85877	-1.28261
AN6236	-1.5177	-1.28215
AN5505	-3.95621	-1.28158
AN10949	0.333648	-1.27972
AN10523	-1.08262	-1.27946
AN5198	0.0408556	-1.27816
AN0873	-1.37578	-1.27771
AN2765	-0.910613	-1.27584
AN4743	-1.41093	-1.27445
AN8981	-5.36898	-1.27397
AN4462	0.803273	-1.27198
AN8688	-1.5027	-1.27014
AN3054	-1.54605	-1.27013
AN2274	-1.36915	-1.26878
AN5970	-1.43962	-1.26784
AN4617	-2.05699	-1.26592
AN2261	-1.39247	-1.26434
AN5311	-2.44681	-1.26402
AN5155	-1.67214	-1.26359
AN6046	-0.6193	-1.26335
AN2335	-2.2665	-1.26198
AN2681	-1.96469	-1.26101
AN11211	0.494687	-1.26087
AN6839	-3.49221	-1.26075
AN1449	-1.63075	-1.26015
AN6072	-2.46265	-1.25916
AN4424	-0.627582	-1.25832
AN2325	-2.6872	-1.25805
AN11722	-0.0158974	-1.25804
AN6876	-1.18845	-1.25738
AN2487	0.330455	-1.25599
AN4423	-0.597069	-1.25559
AN11803	-1.38422	-1.25521
AN8956	-4.78766	-1.25506
AN10975	-0.723955	-1.25463
AN4701	-1.50266	-1.25403
AN4149	-0.531058	-1.25313
AN2080	-0.735895	-1.25238
AN0451	-0.69022	-1.25119
AN4255	-0.845327	-1.25115
AN0672	-0.772593	-1.25046
AN7540	-2.50385	-1.25024
AN3817	-2.4781	-1.24928
AN0964	-1.05903	-1.24884
AN8603	-1.56923	-1.2486
AN3961	-1.57194	-1.24583
AN5915	-1.39683	-1.24528
AN5529	-0.79769	-1.24438
AN3394	-2.95605	-1.24382
AN12338	-0.880541	-1.24321
AN3215	-1.40972	-1.24118
AN5187	-1.36575	-1.23827
AN10685	-0.494676	-1.23818
AN6737	-1.34356	-1.23608
AN1523	-1.04341	-1.23557
AN2110	-0.799636	-1.23546
AN5123	0.295558	-1.23486
AN8978	-2.17157	-1.23335
AN0173	-0.92264	-1.23316
AN3593	-1.26913	-1.23294
AN4017	-0.564668	-1.2326
AN7561	-0.983915	-1.23235
AN2484	-0.199631	-1.23184
AN1725	-0.0678489	-1.23171
AN4259	-2.34725	-1.23105
AN5734	-1.85555	-1.22957
AN8163	-0.616272	-1.22785
AN10526	-3.42278	-1.22743
AN0484	-0.889046	-1.22444
AN10318	-0.452764	-1.22442
AN3709	-1.55111	-1.22355
AN2233	0.202666	-1.2226
AN1480	-0.748019	-1.222
AN8275	-1.01598	-1.22188
AN7362	-0.208555	-1.22122
AN2022	-0.901545	-1.21984
AN5752	-0.124255	-1.21965
AN7011	0.947265	-1.21855
AN3708	0.0638179	-1.21818
AN0212	-0.412907	-1.21806
AN8945	0.109958	-1.21689
AN0276	-1.66283	-1.21561
AN7248	-3.29057	-1.21531
AN0086	-0.937648	-1.21493
AN4218	-1.94621	-1.21468
AN0720	-0.992243	-1.21331
AN1190	-1.53417	-1.21235
AN3943	0.00227313	-1.21234
AN3459	-0.575874	-1.21185
AN7091	0.112189	-1.20996
AN2987	-1.29403	-1.20842
AN0435	-1.22985	-1.20752
AN3605	0.247357	-1.20713
AN4501	-0.957137	-1.20665
AN5162	-1.05496	-1.20649
AN0906	-2.49592	-1.20597
AN0384	-0.920569	-1.20581
AN11002	-0.858363	-1.20569
AN7918	-0.906115	-1.20507
AN4585	-0.938847	-1.20484
AN3917	-1.03783	-1.20402
AN2440	-0.624854	-1.20316
AN2975	-0.868701	-1.20291
AN4319	-2.01783	-1.20259
AN2459	-1.66217	-1.20259
AN7997	-2.72318	-1.20069
AN5836	-1.55328	-1.20038
AN6952	-4.23534	-1.19947
AN3035	-2.26307	-1.19885
AN4015	-1.55107	-1.19874
AN4349	-2.18844	-1.19789
AN1274	0.960462	-1.19767
AN8851	-2.85719	-1.19732
AN5035	-1.84212	-1.19712
AN2270	-0.746232	-1.19704
AN2797	-1.71497	-1.19666
AN8862	-1.42833	-1.19374
AN1379	-1.17242	-1.1929
AN8268	-1.75046	-1.19181
AN6311	-0.26593	-1.1898
AN0272	-0.294485	-1.18931
AN3469	-0.305689	-1.18869
AN0607	-0.929702	-1.18821
AN7004	-0.381548	-1.18756
AN11885	-1.84653	-1.18608
AN6901	-0.840732	-1.18379
AN10235	-2.18801	-1.18314
AN11696	-1.75619	-1.18274
AN8905	-2.03948	-1.18232
AN8145	-0.308019	-1.18219
AN4575	-1.35296	-1.18005
AN4443	-1.40872	-1.17948
AN6339	-1.55024	-1.17867
AN4886	-0.500284	-1.17844
AN11934	-0.8523	-1.17828
AN0551	-1.7526	-1.177
AN1371	-0.689687	-1.17698
AN3121	-1.08426	-1.17504
AN3515	-4.05376	-1.17433
AN5508	-1.76904	-1.17419
AN7680	-1.81295	-1.17418
AN6697	-1.47981	-1.17125
AN10229	-0.619355	-1.17095
AN2623	-1.43598	-1.17037
AN4509	-1.32058	-1.16946
AN4290	-1.38135	-1.16891
AN8079	-1.20211	-1.16855
AN10259	-0.150815	-1.16809
AN1693	-0.219212	-1.1674
AN0977	-1.02525	-1.16682
AN6323	-0.890612	-1.16565
AN4353	0.00595216	-1.16562
AN7502	-1.80049	-1.16436
AN1969	-0.400957	-1.16317
AN0941	-0.874358	-1.16155
AN6310	-3.00529	-1.16086
AN5128	-0.931324	-1.15915
AN5740	-0.954926	-1.15895
AN10257	-1.1657	-1.15824
AN8078	-0.359156	-1.15735
AN4178	-2.39579	-1.15667
AN10586	-1.63879	-1.15667
AN0081	-0.687239	-1.15579
AN4465	-1.55865	-1.15535
AN11425	-2.07142	-1.15512
AN7308	-0.583182	-1.15485
AN10922	-2.1261	-1.15377
AN3947	-2.23889	-1.1527
AN5210	-1.24838	-1.15235
AN12151	-1.01073	-1.15171
AN0440	-0.492036	-1.15103
AN7578	-0.420934	-1.15053
AN9314	0.272548	-1.15049
AN10597	-1.80086	-1.15046
AN4427	-1.59175	-1.14954
AN3659	-0.842556	-1.14941
AN1221	-0.984511	-1.14778
AN2993	-0.354057	-1.14744
AN8861	-0.700092	-1.14327
AN5705	-0.932765	-1.14318
AN3578	-0.577453	-1.14301
AN3628	-0.862866	-1.1423
AN4887	-0.954117	-1.14188
AN1158	-0.752413	-1.13966
AN7320	-1.9108	-1.13918
AN6368	-0.611733	-1.13913
AN10413	-1.47798	-1.1385
AN0745	-3.19492	-1.13802
AN5910	-1.63774	-1.13765
AN10481	2.44551	-1.13708
AN3625	-0.958196	-1.13693
AN4051	-0.900563	-1.13644
AN0296	-0.555994	-1.13594
AN8810	-0.381415	-1.13579
AN10540	0.873868	-1.13538
AN10089	-1.24565	-1.13505
AN9028	-1.62741	-1.13448
AN11033	-0.638462	-1.13431
AN8244	-1.46103	-1.13376
AN7669	0.564044	-1.13305
AN1129	-0.379575	-1.13266
AN4320	-1.88259	-1.13084
AN10171	-0.0181008	-1.13029
AN7111	-1.00547	-1.12877
AN3367	-0.474273	-1.1287
AN2875	0.521537	-1.12829
AN11691	-2.23155	-1.12697
AN8146	-0.721144	-1.12689
AN0546	-1.18009	-1.12584
AN1845	-0.407984	-1.12574
AN1058	-1.17448	-1.12499
AN0120	0.0815424	-1.12379
AN1543	-0.646518	-1.12261
AN9066	-0.324053	-1.12214
AN10462	-0.657663	-1.122
AN1249	-1.76522	-1.12161
AN4822	-2.76286	-1.11961
AN8178	0.0935125	-1.1176
AN3062	-1.15647	-1.11705
AN6277	-0.45588	-1.11683
AN7659	-0.572371	-1.11499
AN0038	-0.795824	-1.11432
AN1526	-0.741366	-1.11312
AN0299	0.363829	-1.11305
AN1958	-1.15272	-1.11189
AN2889	-1.11439	-1.11156
AN2014	-0.853913	-1.11107
AN5998	-2.09733	-1.10926
AN1082	-0.979579	-1.10845
AN11712	-1.41923	-1.10715
AN7305	-2.54517	-1.10642
AN8848	-2.34672	-1.10596
AN5448	0.335742	-1.10588
AN7105	-2.14908	-1.10564
AN4873	-1.34677	-1.10557
AN3018	-0.945804	-1.10529
AN1004	-0.4037	-1.105
AN4881	-1.16286	-1.10403
AN8606	-1.06342	-1.1034
AN10415	-0.22203	-1.10268
AN8763	0.376604	-1.10135
AN3879	-1.86847	-1.10131
AN12398	-1.23881	-1.10032
AN4963	-0.963844	-1.09984
AN1094	-0.709865	-1.09929
AN7033	-0.0362929	-1.09882
AN3635	-2.45609	-1.09829
AN11721	-1.60805	-1.0977
AN7447	-1.55864	-1.09639
AN2124	-1.79405	-1.09521
AN4495	-1.07764	-1.09362
AN1524	-2.10572	-1.09197
AN10131	-1.80097	-1.09166
AN11123	-0.783044	-1.09095
AN8814	-2.06001	-1.08995
AN2931	0.418237	-1.0896
AN1809	-1.3636	-1.08853
AN5335	-0.160906	-1.08826
AN1045	-2.31982	-1.08734
AN0071	-0.822403	-1.08733
AN6853	-0.877589	-1.08386
AN5968	-1.20081	-1.08316
AN11978	-0.433023	-1.08304
AN6090	-0.789184	-1.08291
AN10222	0.358848	-1.0822
AN8907	-0.112623	-1.08197
AN5682	-1.20605	-1.08135
AN4727	-1.12246	-1.08109
AN1399	-1.49127	-1.08072
AN1369	-1.37804	-1.08009
AN3684	-0.680053	-1.07868
AN6534	-0.908176	-1.07809
AN7285	0.477651	-1.07724
AN7128	-1.49563	-1.07594
AN0200	1.08728	-1.07568
AN1832	-0.954997	-1.07443
AN5861	-0.837317	-1.07442
AN2388	-1.70352	-1.07393
AN10440	-0.639291	-1.07302
AN6332	-1.17785	-1.07283
AN0324	-0.732872	-1.07202
AN7468	-0.439765	-1.07137
AN0986	-1.44047	-1.07057
AN5745	-1.09932	-1.06992
AN1181	-0.891122	-1.0697
AN10797	-0.100775	-1.06955
AN10966	-1.28586	-1.06908
AN3524	-0.36404	-1.06883
AN3113	-1.07245	-1.06859
AN2871	-1.5284	-1.06748
AN1005	-0.426747	-1.06645
AN0044	-2.04363	-1.06575
AN6654	-0.474328	-1.06451
AN2105	-1.49168	-1.06451
AN1267	-0.108235	-1.0645
AN4428	-0.794886	-1.06422
AN8041	-0.439175	-1.0622
AN1400	-0.266852	-1.06168
AN10403	-1.59413	-1.06159
AN7794	-2.45126	-1.06106
AN7676	-0.643034	-1.05866
AN3874	-0.454095	-1.05845
AN8439	0.220224	-1.05801
AN3395	-1.43388	-1.05763
AN2204	-3.8703	-1.05648
AN11804	-0.484047	-1.05634
AN8726	-0.80844	-1.05512
AN1876	-0.330053	-1.05403
AN4682	-0.0623192	-1.05398
AN8044	-1.07931	-1.05373
AN5708	-0.0318943	-1.05309
AN10210	-0.694193	-1.05248
AN4037	-0.510716	-1.05228
AN6652	-1.57084	-1.05223
AN6599	-0.55309	-1.05188
AN9504	-3.21078	-1.05144
AN10203	-1.95396	-1.0512
AN0706	-0.530909	-1.05073
AN8998	-1.10219	-1.05019
AN6868	-1.45833	-1.04975
AN1528	-0.857538	-1.04963
AN7434	0.161307	-1.04865
AN5450	-1.09679	-1.04804
AN8000	-1.64672	-1.04661
AN11197	-1.41932	-1.04585
AN4165	-1.8123	-1.04528
AN4499	-1.64505	-1.04501
AN6135	-1.40879	-1.04483
AN11889	-1.04706	-1.04378
AN0434	-0.732079	-1.0423
AN0230	-0.549586	-1.04216
AN0252	-0.826971	-1.04109
AN6344	0.14081	-1.0398
AN1346	-1.20559	-1.03916
AN0747	-1.00705	-1.03865
AN4190	-0.836504	-1.03826
AN4910	-0.255222	-1.03749
AN5916	-0.450016	-1.03701
AN8212	-1.64794	-1.03668
AN4919	-0.0341436	-1.03537
AN0653	-1.69439	-1.03499
AN0973	0.00446641	-1.03477
AN2006	-0.561164	-1.03452
AN3468	-0.397033	-1.03412
AN10564	0.528126	-1.03387
AN10550	-0.981423	-1.03307
AN7439	-0.806053	-1.03224
AN4865	-3.01728	-1.03205
AN10434	-1.088	-1.03149
AN4174	0.359806	-1.02972
AN4574	-1.56602	-1.0294
AN1304	-1.02395	-1.02845
AN1896	-1.68734	-1.02725
AN1048	-0.639867	-1.02677
AN10032	-0.716264	-1.02642
AN0595	-0.509452	-1.02607
AN8262	-0.281536	-1.02543
AN3370	-1.0509	-1.02529
AN6934	-2.52733	-1.02478
AN6980	-0.869189	-1.02365
AN0692	-0.960868	-1.02358
AN6809	-1.36672	-1.02341
AN7709	-0.874124	-1.0224
AN8676	-1.02222	-1.02144
AN10163	-0.138081	-1.02067
AN0688	0.392697	-1.0206
AN4969	-1.02081	-1.0206
AN4426	-1.85957	-1.01942
AN4965	-0.796841	-1.01928
AN0258	-1.10957	-1.01878
AN10954	0.00953519	-1.01877
AN4000	-3.09947	-1.01843
AN7351	-1.597	-1.01807
AN1895	-1.52464	-1.01718
AN9067	0.125532	-1.01655
AN10525	0.154812	-1.01558
AN10561	-1.37222	-1.01535
AN4868	-2.57528	-1.01312
AN4093	-1.41177	-1.0106
AN6687	-1.02288	-1.01001
AN0643	-0.593101	-1.00936
AN1459	-1.43643	-1.00863
AN7576	-1.01342	-1.00819
AN7602	-0.575004	-1.00761
AN1622	-0.502397	-1.00682
AN5146	-1.32858	-1.00654
AN10319	-0.904804	-1.00582
AN3094	-1.8403	-1.00498
AN2935	-1.02092	-1.00446
AN4237	-2.33602	-1.00446
AN10845	-2.05428	-1.00394
AN3206	-0.280134	-1.00384
AN4003	-0.506279	-1.00319
AN0443	0.207349	-1.00237
AN6234	-2.65455	-1.00202
AN1329	0.365334	-1.00165
AN2385	-1.1731	-1.00141
AN7014	-1.25424	-1.00109
AN0227	-1.4798	-1.0004
AN1948	-1.35378	-1.00037
AN6875	-1.67036	-1.0002
AN1857	-1.36979	-0.999995
AN6560	-0.392818	-0.99947
AN10737	-0.742802	-0.998091
AN3196	-0.673909	-0.9978
AN1888	-1.14347	-0.997528
AN6906	-0.512315	-0.996444
AN6042	-0.995474	-0.996276
AN7441	-1.66873	-0.996189
AN2423	-1.94052	-0.996186
AN0268	-1.55569	-0.993765
AN6782	-2.05247	-0.993127
AN7188	-2.3185	-0.992671
AN2773	-1.27661	-0.992399
AN1328	-0.595731	-0.991877
AN8880	-0.332799	-0.990136
AN1477	-1.27323	-0.990023
AN5122	-0.376183	-0.989742
AN0734	-0.421469	-0.988353
AN12121	-0.792043	-0.988063
AN8744	-0.247874	-0.98662
AN6007	-0.723956	-0.986098
AN1604	-0.543423	-0.986017
AN3661	-0.888332	-0.985935
AN5744	-0.734485	-0.985775
AN11991	-0.382815	-0.984884
AN6827	-0.874779	-0.984575
AN5821	-1.61082	-0.984108
AN10694	-1.59887	-0.984033
AN6844	-1.25068	-0.983869
AN10195	1.50627	-0.983112
AN3518	-0.918719	-0.982789
AN2745	-0.224837	-0.982496
AN4269	-0.71361	-0.982482
AN11131	-0.501227	-0.981914
AN2130	-1.45296	-0.981448
AN9116	0.00783779	-0.981087
AN0106	-0.678004	-0.980752
AN2098	1.00302	-0.980712
AN5870	-1.80452	-0.980316
AN8065	-0.00997028	-0.980154
AN2626	-3.14656	-0.979495
AN0232	-0.0240257	-0.979412
AN4571	-2.87609	-0.978925
AN8429	-3.9463	-0.978622
AN7292	-1.37527	-0.978598
AN7433	-0.904668	-0.97829
AN6040	-1.1978	-0.97783
AN4417	-2.14662	-0.977527
AN9107	0.225717	-0.977135
AN5482	-1.15003	-0.976395
AN1706	-0.81684	-0.976372
AN10285	0.122528	-0.976312
AN6604	-1.53785	-0.975262
AN6694	-0.81383	-0.974822
AN1454	-1.08534	-0.974478
AN11808	-1.22467	-0.974038
AN6822	-2.28005	-0.973886
AN7625	-1.75932	-0.972327
AN1067	0.10604	-0.971963
AN10959	0.208943	-0.970907
AN0256	1.14213	-0.970357
AN6143	-1.99168	-0.970295
AN5630	-0.722265	-0.97013
AN3922	-0.292097	-0.969749
AN1270	-1.98224	-0.968831
AN0282	-1.3854	-0.968544
AN5446	-0.688997	-0.967561
AN2895	1.6363	-0.966719
AN7554	-2.87571	-0.965716
AN4210	-0.475725	-0.965199
AN1712	-1.22754	-0.965027
AN6493	0.325953	-0.964537
AN6541	-1.212	-0.964405
AN0872	-1.7372	-0.964334
AN4434	-1.0553	-0.963386
AN2964	-0.901675	-0.963051
AN1601	-0.283022	-0.962926
AN1659	-0.987614	-0.962875
AN4582	-0.982779	-0.962423
AN0507	-1.00896	-0.962353
AN5959	-1.29117	-0.961878
AN6540	-2.13542	-0.961565
AN6566	0.206815	-0.960342
AN6975	-0.873273	-0.960264
AN9159	-0.439964	-0.959795
AN8224	-0.432514	-0.959741
AN7508	-0.86177	-0.959533
AN1770	-1.995	-0.958943
AN4086	0.601194	-0.958636
AN10306	-0.598765	-0.956803
AN6714	-2.66636	-0.956614
AN2743	-2.5972	-0.956221
AN1246	-0.251303	-0.956135
AN3253	-2.05232	-0.95577
AN1782	0.0694516	-0.955355
AN6019	-3.79322	-0.955254
AN5629	-0.841336	-0.95462
AN11565	-0.451109	-0.954105
AN1213	-2.32053	-0.953899
AN8682	-2.05718	-0.953372
AN0423	0.193782	-0.952847
AN5924	-1.35158	-0.952717
AN3057	-0.501	-0.949223
AN7271	-0.040691	-0.949169
AN8823	0.0325985	-0.949109
AN6533	-0.62757	-0.948662
AN5748	-1.90511	-0.9481
AN9023	-0.882307	-0.947873
AN3454	-0.863	-0.947261
AN6126	-0.145222	-0.947043
AN4587	-1.20649	-0.946399
AN8748	-0.689175	-0.946114
AN5878	-0.118136	-0.946063
AN7839	-0.8273	-0.946047
AN10247	-0.814075	-0.945343
AN8170	-0.658895	-0.944348
AN11115	-1.71085	-0.943705
AN7459	-0.0272039	-0.943677
AN10661	-0.143364	-0.942981
AN5669	0.909855	-0.942503
AN5521	-0.997779	-0.942466
AN7000	-1.29096	-0.941538
AN10255	-1.61632	-0.941499
AN1319	-2.72393	-0.941402
AN2186	-2.56186	-0.939594
AN0870	-0.870027	-0.93949
AN0984	-0.801524	-0.939131
AN8790	0.279671	-0.938815
AN6142	-0.520964	-0.938448
AN6195	-0.4956	-0.937826
AN3211	-1.17098	-0.93739
AN11303	-0.269255	-0.936856
AN2088	-0.609763	-0.936105
AN0427	-0.893327	-0.935724
AN1427	-0.586995	-0.935504
AN0695	-2.79974	-0.935359
AN6843	-1.54026	-0.935051
AN0673	-0.0815378	-0.934859
AN2982	-2.14268	-0.934683
AN11898	-0.15989	-0.934473
AN2764	-0.200396	-0.934401
AN6631	-0.624367	-0.933874
AN3463	-1.18137	-0.93336
AN1954	-2.56673	-0.931463
AN0666	-0.684241	-0.931452
AN3092	-1.19433	-0.931426
AN4804	0.399736	-0.931182
AN10212	-0.566059	-0.930893
AN2416	-0.130005	-0.930709
AN5704	-0.383415	-0.930431
AN2885	-0.378156	-0.92963
AN1913	-0.409515	-0.928056
AN5022	-0.761488	-0.928051
AN10635	-2.04495	-0.927595
AN2932	-2.74208	-0.92687
AN8454	-4.71369	-0.926764
AN3466	-0.0738365	-0.926502
AN8561	-0.994628	-0.926436
AN0429	-0.73477	-0.925657
AN0659	-1.85321	-0.925071
AN4038	-1.74661	-0.92429
AN6598	-0.819086	-0.924036
AN8671	-2.76621	-0.923478
AN8501	0.090786	-0.922995
AN0137	0.103475	-0.922758
AN11079	-1.47254	-0.921994
AN4294	0.362987	-0.921899
AN3154	-0.998109	-0.921829
AN7005	-1.8084	-0.921757
AN12386	-1.07271	-0.921531
AN7617	-1.65273	-0.921458
AN9109	-1.38029	-0.921284
AN4425	-0.897233	-0.920843
AN9121	-0.437438	-0.920413
AN10313	-2.5826	-0.919687
AN7339	-2.23304	-0.919133
AN3164	0.045737	-0.91881
AN7399	-1.85654	-0.918552
AN7190	-0.952422	-0.918416
AN3894	-1.78607	-0.918105
AN3945	-1.62829	-0.915372
AN1217	-1.29599	-0.915055
AN5036	0.561155	-0.913996
AN6296	-1.60811	-0.913725
AN0036	1.92268	-0.91364
AN6496	-1.92595	-0.91356
AN3552	-1.63993	-0.913365
AN1226	-0.734197	-0.913077
AN7476	0.615825	-0.912814
AN8940	-1.31824	-0.912756
AN0224	-0.993705	-0.912392
AN1442	-0.648311	-0.91237
AN10157	-0.625407	-0.912108
AN5557	-0.814845	-0.912104
AN0876	-0.517952	-0.911543
AN2622	-0.641578	-0.910897
AN2742	-0.493911	-0.910867
AN9408	-0.479773	-0.910577
AN5224	-0.99078	-0.910354
AN9372	-0.640813	-0.910207
AN5547	0.132171	-0.910079
AN0380	-1.08179	-0.909878
AN4889	-1.02249	-0.909277
AN4020	-0.316256	-0.906867
AN0698	-1.7469	-0.906789
AN0794	-1.04388	-0.906738
AN4388	-0.547726	-0.904823
AN8849	-1.0182	-0.904568
AN5678	-0.353848	-0.904453
AN7961	-0.679284	-0.903284
AN3438	-0.85738	-0.90281
AN3770	-1.30365	-0.901972
AN8528	-1.00461	-0.901676
AN1115	-1.81646	-0.901556
AN3711	-1.09665	-0.90136
AN10543	-1.26516	-0.900801
AN2311	0.0565946	-0.900518
AN10189	-1.42819	-0.900307
AN4653	-0.74297	-0.899522
AN9117	-0.2306	-0.898997
AN8016	-1.6408	-0.898941
AN0846	-1.22235	-0.898544
AN1862	-0.994003	-0.897624
AN1390	-5.95e-05	-0.897407
AN2002	-0.198906	-0.895426
AN2685	-0.688401	-0.89537
AN10080	-0.266288	-0.894655
AN0582	-0.861577	-0.894431
AN2091	-1.11854	-0.894197
AN8883	0.568339	-0.893977
AN7537	-0.994314	-0.893226
AN4835	-0.357976	-0.892549
AN6014	-0.325935	-0.891527
AN4254	-0.482775	-0.891055
AN5860	-0.479624	-0.890465
AN1189	-1.89188	-0.890464
AN1023	0.064636	-0.890256
AN4758	-0.713154	-0.890042
AN8242	-0.00247051	-0.889225
AN5531	-1.18759	-0.889158
AN8236	-0.410945	-0.888694
AN11543	-0.183851	-0.887923
AN0596	-0.136402	-0.886513
AN10355	-0.33372	-0.886136
AN7563	-0.759521	-0.88553
AN10349	-0.947731	-0.884933
AN4892	-0.953486	-0.884699
AN6160	-1.08333	-0.884453
AN0850	-0.202486	-0.884201
AN6669	-1.49001	-0.883823
AN1879	-0.433323	-0.883541
AN2193	-0.409668	-0.882784
AN6171	-2.57697	-0.881998
AN5695	0.190659	-0.881268
AN1906	-0.797237	-0.879991
AN5111	-3.19505	-0.878983
AN3810	-0.829682	-0.87864
AN2937	-0.754515	-0.878459
AN1227	-0.602774	-0.878372
AN11006	-1.21766	-0.87761
AN1054	-0.662076	-0.876839
AN10299	-0.716269	-0.876644
AN3218	-2.2689	-0.876302
AN1216	-0.214431	-0.875376
AN6644	-0.813252	-0.875271
AN4362	-0.973276	-0.874501
AN1564	-1.66758	-0.872701
AN8208	-0.294895	-0.872695
AN2166	-0.250932	-0.872577
AN1156	-2.61615	-0.872502
AN0726	-1.28232	-0.87241
AN12199	-0.606458	-0.871432
AN3168	0.0306878	-0.871206
AN11989	0.0264393	-0.871108
AN4821	-1.72653	-0.869597
AN2260	0.0230474	-0.869031
AN1318	-7.225	-0.868631
AN3396	-1.07181	-0.868258
AN4251	-1.48979	-0.867906
AN2662	0.943163	-0.866845
AN2582	-0.654599	-0.866187
AN6768	-0.926773	-0.865189
AN1489	-0.26936	-0.864767
AN0757	-2.2632	-0.863549
AN3716	0.182546	-0.863437
AN6287	-0.572935	-0.863316
AN2780	-3.38342	-0.86328
AN2970	0.302426	-0.863193
AN2141	-1.08293	-0.862819
AN11145	-3.02599	-0.862509
AN1733	-1.25211	-0.860525
AN6047	-0.458476	-0.860486
AN8826	-2.51207	-0.860191
AN1444	-0.279565	-0.859876
AN6210	-0.359756	-0.859372
AN6295	-0.333026	-0.857905
AN2182	-0.363235	-0.857544
AN8864	-0.0667067	-0.857376
AN6542	-0.666786	-0.855728
AN4764	-0.326466	-0.854758
AN1025	-0.772849	-0.853612
AN6508	0.423257	-0.85341
AN6549	0.154713	-0.853313
AN0424	-0.989484	-0.850977
AN0864	-0.181648	-0.850845
AN0347	-0.61885	-0.849461
AN6622	-0.790146	-0.847657
AN1095	-1.48028	-0.84646
AN4891	-0.646578	-0.846317
AN10487	-0.271915	-0.846133
AN7525	-1.30432	-0.846084
AN10175	0.016096	-0.84592
AN2285	-0.342485	-0.844975
AN10815	-2.69234	-0.843712
AN11083	1.0767	-0.843587
AN0901	-1.55961	-0.843095
AN4783	-0.189778	-0.843071
AN3809	-0.53683	-0.842768
AN5853	0.0897413	-0.842194
AN12299	-0.625797	-0.841893
AN5583	-0.297559	-0.841383
AN11900	-0.359527	-0.841341
AN3785	-0.930104	-0.841331
AN10016	-0.750895	-0.838667
AN0828	0.343816	-0.837756
AN10240	-1.22888	-0.837359
AN4278	-0.629065	-0.836091
AN2518	-1.53687	-0.835588
AN4379	-0.855799	-0.835501
AN2775	-1.45414	-0.834626
AN4346	-3.7164	-0.834442
AN2668	-0.514177	-0.832403
AN6715	-1.30238	-0.832125
AN2194	-1.35798	-0.831863
AN2689	-0.854051	-0.831604
AN5716	-1.32033	-0.830757
AN8839	-1.89459	-0.830543
AN5452	-2.25841	-0.830542
AN1683	-0.718541	-0.830429
AN10055	-3.30207	-0.829647
AN7937	-0.437245	-0.829608
AN3616	-0.284433	-0.829474
AN3837	-1.37251	-0.82873
AN12236	0.42931	-0.828225
AN4867	-0.0911269	-0.826766
AN2298	-0.887086	-0.826631
AN7952	-0.782268	-0.826397
AN3559	-1.39141	-0.826009
AN11802	0.00777716	-0.825678
AN11762	-0.0703288	-0.824703
AN5778	-0.233979	-0.823394
AN1976	-0.769456	-0.823337
AN0237	-2.05299	-0.823159
AN0995	-1.53917	-0.822756
AN11597	1.07658	-0.821888
AN1498	-0.00644345	-0.821801
AN11146	-0.178255	-0.8217
AN6238	-1.41073	-0.821684
AN6828	-0.470293	-0.82111
[truncated: 8,214 more rows]
