# Supplementary material for: Global Transcriptomic Changes Elicited by sodB Deletion and Menadione Exposure in Aspergillus nidulans
Source: J Fungi (Basel). 2023 Oct 30;9(11):1060. doi: 10.3390/jof9111060 (PMC10671992; doi:10.3390/jof9111060)
Supplement: Supplementary file 1 [file jof-09-01060-s001.zip › Table S3.xlsx]

## Sheet: Overview
	Table S3	Results of the gene set enrichment analyses
		The ShinyGO 0.77 (http://bioinformatics.sdstate.edu/go/) platform was used with default settings.
	Sheet 1	A. nidulans	THS30.3: MSB treated vs. untreated
	Sheet 2	A. nidulans	DsodB: MSB treated vs. untreated
	Sheet 3	A. nidulans	Untreated: DsodB vs. THS30.3
	Sheet 4	A. nidulans	MSB treated: DsodB vs. THS30.3

## Sheet: Sheet1
Sheet 1	A. nidulans	THS30.3: MSB treated vs. untreated
Species	Type of genes	Criteria	Number of genes
A. nidulans	upregulated	DEG; log2FC>1	2235
Enrichment FDR	nGenes	Pathway Genes	Fold Enrichment	Pathway	URL	Genes
0.00153657	15	21	3.46349	Iron-sulfur cluster assembly	http://amigo.geneontology.org/amigo/term/GO:0016226	ANIA_00447 ANIA_01407 ANIA_01469 ANIA_02155 ANIA_02508 ANIA_03632 ANIA_04304 ANIA_04655 ANIA_05953 ANIA_08485 ANIA_10012 ANIA_10237 ANIA_10283 ANIA_10584 ANIA_11060
0.00153657	15	21	3.46349	Metallo-sulfur cluster assembly	http://amigo.geneontology.org/amigo/term/GO:0031163	ANIA_00447 ANIA_01407 ANIA_01469 ANIA_02155 ANIA_02508 ANIA_03632 ANIA_04304 ANIA_04655 ANIA_05953 ANIA_08485 ANIA_10012 ANIA_10237 ANIA_10283 ANIA_10584 ANIA_11060
0.0060159	117	389	1.4584	Response to chemical	http://amigo.geneontology.org/amigo/term/GO:0042221	ANIA_00158 ANIA_00170 ANIA_00225 ANIA_00241 ANIA_00329 ANIA_00408 ANIA_00432 ANIA_00656 ANIA_00670 ANIA_00671 ANIA_00718 ANIA_00825 ANIA_00931 ANIA_00932 ANIA_01017 ANIA_01050 ANIA_01149 ANIA_01163 ANIA_01252 ANIA_01396 ANIA_01795 ANIA_01800 ANIA_01812 ANIA_01853 ANIA_02005 ANIA_02045 ANIA_02213 ANIA_02238 ANIA_02242 ANIA_02343 ANIA_02432 ANIA_02530 ANIA_02592 ANIA_02845 ANIA_02846 ANIA_02852 ANI…
0.00664844	240	909	1.28023	Response to stimulus	http://amigo.geneontology.org/amigo/term/GO:0050896	ANIA_00056 ANIA_00091 ANIA_00097 ANIA_00144 ANIA_00158 ANIA_00170 ANIA_00225 ANIA_00241 ANIA_00256 ANIA_00329 ANIA_00363 ANIA_00387 ANIA_00408 ANIA_00432 ANIA_00556 ANIA_00604 ANIA_00656 ANIA_00658 ANIA_00670 ANIA_00671 ANIA_00718 ANIA_00825 ANIA_00881 ANIA_00931 ANIA_00932 ANIA_01017 ANIA_01050 ANIA_01149 ANIA_01163 ANIA_01237 ANIA_01252 ANIA_01339 ANIA_01364 ANIA_01386 ANIA_01396 ANIA_01668 ANI…
0.00893787	25	53	2.28721	Detoxification	http://amigo.geneontology.org/amigo/term/GO:0098754	ANIA_00225 ANIA_00241 ANIA_00408 ANIA_00932 ANIA_01252 ANIA_01795 ANIA_02592 ANIA_02846 ANIA_02948 ANIA_03298 ANIA_03581 ANIA_03849 ANIA_04215 ANIA_05232 ANIA_05440 ANIA_05577 ANIA_05918 ANIA_06024 ANIA_06045 ANIA_06158 ANIA_07823 ANIA_08637 ANIA_09339 ANIA_10220 ANIA_11015
0.00893787	16	27	2.87341	2-Oxocarboxylic acid metabolism	http://www.genome.jp/kegg-bin/show_pathway?ani01210	ANIA_00912 ANIA_01990 ANIA_02526 ANIA_02793 ANIA_04430 ANIA_04793 ANIA_05300 ANIA_05525 ANIA_05867 ANIA_05886 ANIA_05957 ANIA_06338 ANIA_06346 ANIA_07876 ANIA_08511 ANIA_08709
0.0102454	33	80	2.00016	Cellular response to oxidative stress	http://amigo.geneontology.org/amigo/term/GO:0034599	ANIA_00158 ANIA_00170 ANIA_00241 ANIA_00432 ANIA_00932 ANIA_01017 ANIA_01149 ANIA_01853 ANIA_02343 ANIA_02846 ANIA_02911 ANIA_03339 ANIA_03581 ANIA_03697 ANIA_04215 ANIA_04304 ANIA_04483 ANIA_05324 ANIA_05440 ANIA_05523 ANIA_05577 ANIA_05918 ANIA_06024 ANIA_06045 ANIA_06193 ANIA_06347 ANIA_07335 ANIA_07513 ANIA_07914 ANIA_08330 ANIA_08637 ANIA_10011 ANIA_10220
0.0102454	143	509	1.36226	Response to stress	http://amigo.geneontology.org/amigo/term/GO:0006950	ANIA_00091 ANIA_00097 ANIA_00158 ANIA_00170 ANIA_00241 ANIA_00329 ANIA_00387 ANIA_00432 ANIA_00556 ANIA_00604 ANIA_00656 ANIA_00670 ANIA_00671 ANIA_00825 ANIA_00881 ANIA_00931 ANIA_00932 ANIA_01017 ANIA_01149 ANIA_01163 ANIA_01237 ANIA_01364 ANIA_01668 ANIA_01731 ANIA_01795 ANIA_01800 ANIA_01812 ANIA_01853 ANIA_01867 ANIA_01936 ANIA_02005 ANIA_02045 ANIA_02103 ANIA_02213 ANIA_02238 ANIA_02276 ANI…
0.0102454	25	54	2.24485	Response to toxic substance	http://amigo.geneontology.org/amigo/term/GO:0009636	ANIA_00225 ANIA_00241 ANIA_00408 ANIA_00932 ANIA_01252 ANIA_01795 ANIA_02592 ANIA_02846 ANIA_02948 ANIA_03298 ANIA_03581 ANIA_03849 ANIA_04215 ANIA_05232 ANIA_05440 ANIA_05577 ANIA_05918 ANIA_06024 ANIA_06045 ANIA_06158 ANIA_07823 ANIA_08637 ANIA_09339 ANIA_10220 ANIA_11015
0.0135953	74	235	1.52688	Protein catabolic process	http://amigo.geneontology.org/amigo/term/GO:0030163	ANIA_00122 ANIA_00226 ANIA_00295 ANIA_00329 ANIA_00349 ANIA_00441 ANIA_00557 ANIA_00831 ANIA_01019 ANIA_01075 ANIA_01167 ANIA_01179 ANIA_01339 ANIA_01362 ANIA_01573 ANIA_01761 ANIA_01900 ANIA_02000 ANIA_02045 ANIA_02066 ANIA_02071 ANIA_02212 ANIA_02213 ANIA_02238 ANIA_02312 ANIA_02903 ANIA_03003 ANIA_03019 ANIA_03111 ANIA_03449 ANIA_03493 ANIA_03566 ANIA_03689 ANIA_03853 ANIA_03999 ANIA_04236 ANI…
0.0135953	101	340	1.4404	Cellular response to chemical stimulus	http://amigo.geneontology.org/amigo/term/GO:0070887	ANIA_00158 ANIA_00170 ANIA_00241 ANIA_00329 ANIA_00408 ANIA_00432 ANIA_00656 ANIA_00670 ANIA_00671 ANIA_00718 ANIA_00825 ANIA_00931 ANIA_00932 ANIA_01017 ANIA_01050 ANIA_01149 ANIA_01252 ANIA_01396 ANIA_01795 ANIA_01800 ANIA_01812 ANIA_01853 ANIA_02005 ANIA_02045 ANIA_02238 ANIA_02343 ANIA_02530 ANIA_02845 ANIA_02846 ANIA_02852 ANIA_02911 ANIA_03280 ANIA_03298 ANIA_03339 ANIA_03433 ANIA_03449 ANI…
0.0135953	22	47	2.26969	Cellular response to toxic substance	http://amigo.geneontology.org/amigo/term/GO:0097237	ANIA_00241 ANIA_00408 ANIA_00932 ANIA_01252 ANIA_01795 ANIA_02846 ANIA_03298 ANIA_03581 ANIA_03849 ANIA_04215 ANIA_05232 ANIA_05440 ANIA_05577 ANIA_05918 ANIA_06024 ANIA_06045 ANIA_06158 ANIA_07823 ANIA_08637 ANIA_09339 ANIA_10220 ANIA_11015
0.0135953	22	47	2.26969	Cellular detoxification	http://amigo.geneontology.org/amigo/term/GO:1990748	ANIA_00241 ANIA_00408 ANIA_00932 ANIA_01252 ANIA_01795 ANIA_02846 ANIA_03298 ANIA_03581 ANIA_03849 ANIA_04215 ANIA_05232 ANIA_05440 ANIA_05577 ANIA_05918 ANIA_06024 ANIA_06045 ANIA_06158 ANIA_07823 ANIA_08637 ANIA_09339 ANIA_10220 ANIA_11015
0.0135953	37	96	1.86884	Response to oxidative stress	http://amigo.geneontology.org/amigo/term/GO:0006979	ANIA_00158 ANIA_00170 ANIA_00241 ANIA_00432 ANIA_00932 ANIA_01017 ANIA_01149 ANIA_01853 ANIA_01936 ANIA_02103 ANIA_02343 ANIA_02846 ANIA_02911 ANIA_02981 ANIA_03339 ANIA_03581 ANIA_03697 ANIA_04215 ANIA_04304 ANIA_04483 ANIA_05324 ANIA_05440 ANIA_05523 ANIA_05577 ANIA_05918 ANIA_06024 ANIA_06045 ANIA_06193 ANIA_06347 ANIA_07335 ANIA_07513 ANIA_07914 ANIA_08330 ANIA_08637 ANIA_09339 ANIA_10011 ANI…
0.0135953	45	125	1.7456	Cellular amino acid biosynthetic process	http://amigo.geneontology.org/amigo/term/GO:0008652	ANIA_00648 ANIA_00717 ANIA_00840 ANIA_00912 ANIA_01150 ANIA_01446 ANIA_01810 ANIA_01990 ANIA_02042 ANIA_02229 ANIA_02410 ANIA_02525 ANIA_02526 ANIA_02793 ANIA_02873 ANIA_02914 ANIA_03031 ANIA_03695 ANIA_03830 ANIA_04323 ANIA_04355 ANIA_04376 ANIA_04401 ANIA_04409 ANIA_04430 ANIA_04770 ANIA_04793 ANIA_05525 ANIA_05610 ANIA_05799 ANIA_05867 ANIA_05886 ANIA_05957 ANIA_06025 ANIA_06231 ANIA_06338 ANI…
0.0161276	41	112	1.77504	Cellular response to chemical stress	http://amigo.geneontology.org/amigo/term/GO:0062197	ANIA_00158 ANIA_00170 ANIA_00241 ANIA_00432 ANIA_00656 ANIA_00670 ANIA_00931 ANIA_00932 ANIA_01017 ANIA_01149 ANIA_01800 ANIA_01853 ANIA_02005 ANIA_02238 ANIA_02343 ANIA_02846 ANIA_02911 ANIA_03339 ANIA_03522 ANIA_03581 ANIA_03697 ANIA_04215 ANIA_04304 ANIA_04483 ANIA_05324 ANIA_05440 ANIA_05523 ANIA_05577 ANIA_05918 ANIA_06024 ANIA_06045 ANIA_06193 ANIA_06347 ANIA_07335 ANIA_07513 ANIA_07799 ANI…
0.0161276	12	19	3.06245	Response to reactive oxygen species	http://amigo.geneontology.org/amigo/term/GO:0000302	ANIA_00241 ANIA_01149 ANIA_02981 ANIA_03581 ANIA_05324 ANIA_05440 ANIA_05523 ANIA_05577 ANIA_05918 ANIA_06045 ANIA_08637 ANIA_10220
0.0165058	59	180	1.58936	Sulfur compound metabolic process	http://amigo.geneontology.org/amigo/term/GO:0006790	ANIA_00256 ANIA_00401 ANIA_00447 ANIA_00868 ANIA_00932 ANIA_01092 ANIA_01100 ANIA_01407 ANIA_01446 ANIA_01469 ANIA_01547 ANIA_01825 ANIA_02042 ANIA_02155 ANIA_02229 ANIA_02410 ANIA_02508 ANIA_02514 ANIA_02592 ANIA_02846 ANIA_02948 ANIA_03150 ANIA_03298 ANIA_03299 ANIA_03456 ANIA_03632 ANIA_03849 ANIA_03972 ANIA_04081 ANIA_04304 ANIA_04361 ANIA_04655 ANIA_04770 ANIA_04793 ANIA_04905 ANIA_04914 ANI…
0.0165058	9	12	3.63666	Valine, leucine and isoleucine biosynthesis	http://www.genome.jp/kegg-bin/show_pathway?ani00290	ANIA_00912 ANIA_02525 ANIA_02526 ANIA_02793 ANIA_04430 ANIA_05886 ANIA_05957 ANIA_06346 ANIA_07876
0.0165058	34	88	1.87343	Biosynthesis of amino acids	http://www.genome.jp/kegg-bin/show_pathway?ani01230	ANIA_00385 ANIA_00717 ANIA_00912 ANIA_01990 ANIA_02229 ANIA_02525 ANIA_02526 ANIA_02583 ANIA_02728 ANIA_02793 ANIA_02901 ANIA_03031 ANIA_04355 ANIA_04401 ANIA_04430 ANIA_04793 ANIA_05300 ANIA_05525 ANIA_05610 ANIA_05799 ANIA_05867 ANIA_05886 ANIA_05957 ANIA_06025 ANIA_06231 ANIA_06338 ANIA_06346 ANIA_06866 ANIA_07051 ANIA_07588 ANIA_07876 ANIA_08511 ANIA_08709 ANIA_08859
0.0233426	61	190	1.55675	Modification-dependent protein catabolic process	http://amigo.geneontology.org/amigo/term/GO:0019941	ANIA_00226 ANIA_00295 ANIA_00329 ANIA_00441 ANIA_00557 ANIA_00831 ANIA_01019 ANIA_01075 ANIA_01167 ANIA_01179 ANIA_01339 ANIA_01362 ANIA_01761 ANIA_01900 ANIA_02000 ANIA_02045 ANIA_02066 ANIA_02071 ANIA_02212 ANIA_02213 ANIA_02238 ANIA_03003 ANIA_03019 ANIA_03111 ANIA_03449 ANIA_03493 ANIA_03566 ANIA_03689 ANIA_03999 ANIA_04236 ANIA_04492 ANIA_04800 ANIA_05121 ANIA_05344 ANIA_05668 ANIA_05721 ANI…
0.024968	68	218	1.5125	Cellular protein catabolic process	http://amigo.geneontology.org/amigo/term/GO:0044257	ANIA_00122 ANIA_00226 ANIA_00295 ANIA_00329 ANIA_00441 ANIA_00557 ANIA_00831 ANIA_01019 ANIA_01075 ANIA_01167 ANIA_01179 ANIA_01339 ANIA_01362 ANIA_01761 ANIA_01900 ANIA_02000 ANIA_02045 ANIA_02066 ANIA_02071 ANIA_02212 ANIA_02213 ANIA_02238 ANIA_02312 ANIA_03003 ANIA_03019 ANIA_03111 ANIA_03449 ANIA_03493 ANIA_03566 ANIA_03689 ANIA_03853 ANIA_03999 ANIA_04236 ANIA_04492 ANIA_04800 ANIA_05121 ANI…
0.0270253	217	848	1.24081	Cellular response to stimulus	http://amigo.geneontology.org/amigo/term/GO:0051716	ANIA_00056 ANIA_00091 ANIA_00097 ANIA_00144 ANIA_00158 ANIA_00170 ANIA_00241 ANIA_00256 ANIA_00329 ANIA_00363 ANIA_00387 ANIA_00408 ANIA_00432 ANIA_00556 ANIA_00604 ANIA_00656 ANIA_00658 ANIA_00670 ANIA_00671 ANIA_00718 ANIA_00825 ANIA_00881 ANIA_00931 ANIA_00932 ANIA_01017 ANIA_01050 ANIA_01149 ANIA_01163 ANIA_01237 ANIA_01252 ANIA_01339 ANIA_01364 ANIA_01386 ANIA_01396 ANIA_01668 ANIA_01731 ANI…
0.0278014	67	216	1.50405	Proteolysis involved in cellular protein catabolic process	http://amigo.geneontology.org/amigo/term/GO:0051603	ANIA_00122 ANIA_00226 ANIA_00295 ANIA_00329 ANIA_00441 ANIA_00557 ANIA_00831 ANIA_01019 ANIA_01075 ANIA_01167 ANIA_01179 ANIA_01339 ANIA_01362 ANIA_01761 ANIA_01900 ANIA_02000 ANIA_02045 ANIA_02066 ANIA_02071 ANIA_02212 ANIA_02213 ANIA_02238 ANIA_03003 ANIA_03019 ANIA_03111 ANIA_03449 ANIA_03493 ANIA_03566 ANIA_03689 ANIA_03853 ANIA_03999 ANIA_04236 ANIA_04492 ANIA_04800 ANIA_05121 ANIA_05344 ANI…
0.0278014	19	41	2.24704	Cellular oxidant detoxification	http://amigo.geneontology.org/amigo/term/GO:0098869	ANIA_00241 ANIA_00932 ANIA_01252 ANIA_02846 ANIA_03298 ANIA_03581 ANIA_03849 ANIA_04215 ANIA_05232 ANIA_05440 ANIA_05577 ANIA_05918 ANIA_06024 ANIA_06045 ANIA_06158 ANIA_07823 ANIA_08637 ANIA_09339 ANIA_10220
0.0278014	14	26	2.61094	Glutathione transferase activity	http://amigo.geneontology.org/amigo/term/GO:0004364	ANIA_00401 ANIA_00932 ANIA_02592 ANIA_02948 ANIA_03298 ANIA_03299 ANIA_03849 ANIA_04905 ANIA_05831 ANIA_06024 ANIA_06158 ANIA_07365 ANIA_09304 ANIA_10273
0.0278014	20	44	2.20404	Antioxidant activity	http://amigo.geneontology.org/amigo/term/GO:0016209	ANIA_00170 ANIA_00241 ANIA_00932 ANIA_01252 ANIA_02846 ANIA_03298 ANIA_03581 ANIA_03849 ANIA_04215 ANIA_05232 ANIA_05440 ANIA_05577 ANIA_05918 ANIA_06024 ANIA_06045 ANIA_06158 ANIA_07823 ANIA_08637 ANIA_09339 ANIA_10220
0.0278014	19	41	2.24704	Glutathione metabolic process	http://amigo.geneontology.org/amigo/term/GO:0006749	ANIA_00401 ANIA_00932 ANIA_01092 ANIA_01100 ANIA_02514 ANIA_02592 ANIA_02846 ANIA_02948 ANIA_03150 ANIA_03298 ANIA_03299 ANIA_03849 ANIA_03972 ANIA_04905 ANIA_05652 ANIA_06024 ANIA_07365 ANIA_07729 ANIA_09304
0.0293882	37	103	1.74183	Alpha-amino acid biosynthetic process	http://amigo.geneontology.org/amigo/term/GO:1901607	ANIA_00648 ANIA_01150 ANIA_01446 ANIA_01810 ANIA_01990 ANIA_02042 ANIA_02229 ANIA_02410 ANIA_02525 ANIA_02526 ANIA_02873 ANIA_02914 ANIA_03031 ANIA_03695 ANIA_03830 ANIA_04355 ANIA_04376 ANIA_04401 ANIA_04409 ANIA_04430 ANIA_04770 ANIA_04793 ANIA_05525 ANIA_05610 ANIA_05799 ANIA_05867 ANIA_06025 ANIA_06231 ANIA_06338 ANIA_06866 ANIA_07051 ANIA_07722 ANIA_08565 ANIA_08709 ANIA_08859 ANIA_08866 ANI…
0.0293882	9	13	3.35692	Basic amino acid transmembrane transport	http://amigo.geneontology.org/amigo/term/GO:1990822	ANIA_00201 ANIA_02531 ANIA_04477 ANIA_07777 ANIA_08340 ANIA_08868 ANIA_09165 ANIA_10166 ANIA_10338
0.0293882	59	186	1.53809	Ubiquitin-dependent protein catabolic process	http://amigo.geneontology.org/amigo/term/GO:0006511	ANIA_00226 ANIA_00295 ANIA_00329 ANIA_00441 ANIA_00557 ANIA_00831 ANIA_01019 ANIA_01075 ANIA_01167 ANIA_01179 ANIA_01339 ANIA_01362 ANIA_01761 ANIA_01900 ANIA_02045 ANIA_02066 ANIA_02071 ANIA_02212 ANIA_02213 ANIA_02238 ANIA_03003 ANIA_03019 ANIA_03111 ANIA_03449 ANIA_03493 ANIA_03566 ANIA_03689 ANIA_03999 ANIA_04236 ANIA_04492 ANIA_04800 ANIA_05121 ANIA_05344 ANIA_05668 ANIA_05721 ANIA_05900 ANI…
0.0299335	63	202	1.51228	Alpha-amino acid metabolic process	http://amigo.geneontology.org/amigo/term/GO:1901605	ANIA_00200 ANIA_00401 ANIA_00648 ANIA_01092 ANIA_01150 ANIA_01198 ANIA_01446 ANIA_01731 ANIA_01745 ANIA_01810 ANIA_01897 ANIA_01899 ANIA_01990 ANIA_02042 ANIA_02229 ANIA_02410 ANIA_02525 ANIA_02526 ANIA_02873 ANIA_02901 ANIA_02914 ANIA_03031 ANIA_03456 ANIA_03695 ANIA_03830 ANIA_04050 ANIA_04081 ANIA_04355 ANIA_04376 ANIA_04401 ANIA_04409 ANIA_04430 ANIA_04770 ANIA_04793 ANIA_04901 ANIA_05525 ANI…
0.0442835	126	465	1.31389	Cellular response to stress	http://amigo.geneontology.org/amigo/term/GO:0033554	ANIA_00091 ANIA_00097 ANIA_00158 ANIA_00170 ANIA_00241 ANIA_00329 ANIA_00387 ANIA_00432 ANIA_00556 ANIA_00604 ANIA_00656 ANIA_00670 ANIA_00671 ANIA_00825 ANIA_00881 ANIA_00931 ANIA_00932 ANIA_01017 ANIA_01149 ANIA_01163 ANIA_01237 ANIA_01364 ANIA_01668 ANIA_01731 ANIA_01800 ANIA_01812 ANIA_01853 ANIA_01867 ANIA_02005 ANIA_02045 ANIA_02213 ANIA_02238 ANIA_02276 ANIA_02343 ANIA_02527 ANIA_02530 ANI…
0.0442835	61	197	1.50143	Modification-dependent macromolecule catabolic process	http://amigo.geneontology.org/amigo/term/GO:0043632	ANIA_00226 ANIA_00295 ANIA_00329 ANIA_00441 ANIA_00557 ANIA_00831 ANIA_01019 ANIA_01075 ANIA_01167 ANIA_01179 ANIA_01339 ANIA_01362 ANIA_01761 ANIA_01900 ANIA_02000 ANIA_02045 ANIA_02066 ANIA_02071 ANIA_02212 ANIA_02213 ANIA_02238 ANIA_03003 ANIA_03019 ANIA_03111 ANIA_03449 ANIA_03493 ANIA_03566 ANIA_03689 ANIA_03999 ANIA_04236 ANIA_04492 ANIA_04800 ANIA_05121 ANIA_05344 ANIA_05668 ANIA_05721 ANI…
0.044406	7	9	3.77135	Protein maturation by iron-sulfur cluster transfer	http://amigo.geneontology.org/amigo/term/GO:0097428	ANIA_00447 ANIA_01407 ANIA_01469 ANIA_04304 ANIA_04655 ANIA_05953 ANIA_10237
0.0499345	6	7	4.15618	Ligase activity, forming phosphoric ester bonds	http://amigo.geneontology.org/amigo/term/GO:0016886	ANIA_00097 ANIA_01296 ANIA_03129 ANIA_04883 ANIA_06069 ANIA_07762
Species	Type of genes	Criteria	Number of genes
A. nidulans	upregulated	DEG; log2FC>2	1028
Enrichment FDR	nGenes	Pathway Genes	Fold Enrichment	Pathway	URL	Genes
3.10781e-05	160	1111	1.51887	Oxidoreductase activity	http://amigo.geneontology.org/amigo/term/GO:0016491	ANIA_00158 ANIA_00170 ANIA_00216 ANIA_00297 ANIA_00330 ANIA_00454 ANIA_00459 ANIA_00895 ANIA_00912 ANIA_00932 ANIA_01033 ANIA_01149 ANIA_01396 ANIA_01586 ANIA_01642 ANIA_01677 ANIA_01730 ANIA_01731 ANIA_01853 ANIA_01882 ANIA_01899 ANIA_02175 ANIA_02177 ANIA_02208 ANIA_02343 ANIA_02351 ANIA_02389 ANIA_02404 ANIA_02526 ANIA_02527 ANIA_02559 ANIA_02583 ANIA_02607 ANIA_02653 ANIA_02793 ANIA_02815 ANI…
0.00500162	23	90	2.71682	Biosynthesis of amino acids	http://www.genome.jp/kegg-bin/show_pathway?ani01230	ANIA_00385 ANIA_00717 ANIA_00912 ANIA_01990 ANIA_02525 ANIA_02526 ANIA_02583 ANIA_02728 ANIA_02793 ANIA_02901 ANIA_03031 ANIA_04355 ANIA_04793 ANIA_05525 ANIA_05610 ANIA_05867 ANIA_05886 ANIA_05957 ANIA_06231 ANIA_06866 ANIA_07051 ANIA_07588 ANIA_08511
0.00500162	29	126	2.41159	Cellular amino acid biosynthetic process	http://amigo.geneontology.org/amigo/term/GO:0008652	ANIA_00717 ANIA_00840 ANIA_00912 ANIA_01150 ANIA_01446 ANIA_01990 ANIA_02410 ANIA_02525 ANIA_02526 ANIA_02793 ANIA_02873 ANIA_03031 ANIA_03830 ANIA_04323 ANIA_04355 ANIA_04376 ANIA_04770 ANIA_04793 ANIA_05525 ANIA_05610 ANIA_05867 ANIA_05886 ANIA_05957 ANIA_06231 ANIA_06866 ANIA_07051 ANIA_07722 ANIA_08866 ANIA_10298
0.00745563	11	26	4.3978	Glutathione transferase activity	http://amigo.geneontology.org/amigo/term/GO:0004364	ANIA_00401 ANIA_00932 ANIA_02948 ANIA_03298 ANIA_03299 ANIA_03849 ANIA_04905 ANIA_05831 ANIA_06024 ANIA_09304 ANIA_10273
0.00757457	14	42	3.54944	Glutathione metabolic process	http://amigo.geneontology.org/amigo/term/GO:0006749	ANIA_00401 ANIA_00932 ANIA_02514 ANIA_02846 ANIA_02948 ANIA_03150 ANIA_03298 ANIA_03299 ANIA_03849 ANIA_04905 ANIA_05652 ANIA_06024 ANIA_07729 ANIA_09304
0.00934905	10	23	4.51947	Branched-chain amino acid biosynthetic process	http://amigo.geneontology.org/amigo/term/GO:0009082	ANIA_00385 ANIA_00840 ANIA_00912 ANIA_02526 ANIA_02793 ANIA_03830 ANIA_04323 ANIA_04793 ANIA_05886 ANIA_05957
0.0123682	52	314	1.73804	Cellular amino acid metabolic process	http://amigo.geneontology.org/amigo/term/GO:0006520	ANIA_00314 ANIA_00385 ANIA_00401 ANIA_00705 ANIA_00717 ANIA_00840 ANIA_00912 ANIA_01150 ANIA_01446 ANIA_01731 ANIA_01899 ANIA_01990 ANIA_02410 ANIA_02525 ANIA_02526 ANIA_02793 ANIA_02873 ANIA_02901 ANIA_03031 ANIA_03073 ANIA_03456 ANIA_03496 ANIA_03830 ANIA_04050 ANIA_04323 ANIA_04355 ANIA_04376 ANIA_04770 ANIA_04793 ANIA_05525 ANIA_05610 ANIA_05616 ANIA_05867 ANIA_05886 ANIA_05957 ANIA_06022 ANI…
0.0123682	12	35	3.66875	FMN binding	http://amigo.geneontology.org/amigo/term/GO:0010181	ANIA_00297 ANIA_00330 ANIA_01882 ANIA_04421 ANIA_05228 ANIA_06167 ANIA_06753 ANIA_07055 ANIA_07922 ANIA_08587 ANIA_09014 ANIA_09345
0.0123682	35	183	2.02121	Sulfur compound metabolic process	http://amigo.geneontology.org/amigo/term/GO:0006790	ANIA_00401 ANIA_00447 ANIA_00932 ANIA_01407 ANIA_01446 ANIA_01547 ANIA_02155 ANIA_02410 ANIA_02514 ANIA_02846 ANIA_02948 ANIA_03150 ANIA_03298 ANIA_03299 ANIA_03456 ANIA_03632 ANIA_03849 ANIA_04304 ANIA_04655 ANIA_04770 ANIA_04793 ANIA_04905 ANIA_04914 ANIA_05652 ANIA_06024 ANIA_07051 ANIA_07729 ANIA_08032 ANIA_08058 ANIA_08485 ANIA_08933 ANIA_09304 ANIA_09486 ANIA_10012 ANIA_11060
0.0123682	6	9	6.92986	Leucine biosynthetic process	http://amigo.geneontology.org/amigo/term/GO:0009098	ANIA_00840 ANIA_00912 ANIA_02793 ANIA_04323 ANIA_05886 ANIA_05957
0.0139294	9	21	4.45491	Iron-sulfur cluster assembly	http://amigo.geneontology.org/amigo/term/GO:0016226	ANIA_00447 ANIA_01407 ANIA_02155 ANIA_03632 ANIA_04304 ANIA_04655 ANIA_08485 ANIA_10012 ANIA_11060
0.0139294	9	21	4.45491	Metallo-sulfur cluster assembly	http://amigo.geneontology.org/amigo/term/GO:0031163	ANIA_00447 ANIA_01407 ANIA_02155 ANIA_03632 ANIA_04304 ANIA_04655 ANIA_08485 ANIA_10012 ANIA_11060
0.0222389	10	29	3.84992	2-Oxocarboxylic acid metabolism	http://www.genome.jp/kegg-bin/show_pathway?ani01210	ANIA_00912 ANIA_01990 ANIA_02526 ANIA_02793 ANIA_04793 ANIA_05525 ANIA_05867 ANIA_05886 ANIA_05957 ANIA_08511
0.0228725	24	112	2.22746	Cellular response to chemical stress	http://amigo.geneontology.org/amigo/term/GO:0062197	ANIA_00158 ANIA_00170 ANIA_00656 ANIA_00931 ANIA_00932 ANIA_01149 ANIA_01800 ANIA_01853 ANIA_02005 ANIA_02343 ANIA_02846 ANIA_03339 ANIA_03522 ANIA_03581 ANIA_04304 ANIA_05324 ANIA_05523 ANIA_06024 ANIA_06045 ANIA_06193 ANIA_07799 ANIA_08330 ANIA_08637 ANIA_10220
0.027419	10	28	3.71243	Branched-chain amino acid metabolic process	http://amigo.geneontology.org/amigo/term/GO:0009081	ANIA_00385 ANIA_00840 ANIA_00912 ANIA_02526 ANIA_02793 ANIA_03830 ANIA_04323 ANIA_04793 ANIA_05886 ANIA_05957
0.0293137	36	204	1.85254	Alpha-amino acid metabolic process	http://amigo.geneontology.org/amigo/term/GO:1901605	ANIA_00401 ANIA_01150 ANIA_01446 ANIA_01731 ANIA_01899 ANIA_01990 ANIA_02410 ANIA_02525 ANIA_02526 ANIA_02873 ANIA_02901 ANIA_03031 ANIA_03456 ANIA_03830 ANIA_04050 ANIA_04355 ANIA_04376 ANIA_04770 ANIA_04793 ANIA_05525 ANIA_05610 ANIA_05616 ANIA_05867 ANIA_06022 ANIA_06231 ANIA_06639 ANIA_06866 ANIA_07051 ANIA_07451 ANIA_07722 ANIA_08108 ANIA_08172 ANIA_08866 ANIA_10298 ANIA_10863 ANIA_11221
0.0343765	7	15	4.8509	Leucine metabolic process	http://amigo.geneontology.org/amigo/term/GO:0006551	ANIA_00840 ANIA_00912 ANIA_02793 ANIA_04323 ANIA_05886 ANIA_05957 ANIA_09131
0.0351154	22	104	2.22025	Alpha-amino acid biosynthetic process	http://amigo.geneontology.org/amigo/term/GO:1901607	ANIA_01150 ANIA_01446 ANIA_01990 ANIA_02410 ANIA_02525 ANIA_02526 ANIA_02873 ANIA_03031 ANIA_03830 ANIA_04355 ANIA_04376 ANIA_04770 ANIA_04793 ANIA_05525 ANIA_05610 ANIA_05867 ANIA_06231 ANIA_06866 ANIA_07051 ANIA_07722 ANIA_08866 ANIA_10298
Species	Type of genes	Criteria	Number of genes
A. nidulans	upregulated	DEG	3763
Enrichment FDR	nGenes	Pathway Genes	Fold Enrichment	Pathway	URL	Genes
5.87758e-11	118	190	1.7768	Modification-dependent protein catabolic process	http://amigo.geneontology.org/amigo/term/GO:0019941	ANIA_00078 ANIA_00226 ANIA_00295 ANIA_00329 ANIA_00436 ANIA_00441 ANIA_00557 ANIA_00831 ANIA_00911 ANIA_00927 ANIA_01019 ANIA_01075 ANIA_01167 ANIA_01179 ANIA_01245 ANIA_01339 ANIA_01362 ANIA_01461 ANIA_01700 ANIA_01761 ANIA_01900 ANIA_01922 ANIA_01995 ANIA_02000 ANIA_02045 ANIA_02066 ANIA_02071 ANIA_02085 ANIA_02212 ANIA_02213 ANIA_02238 ANIA_02302 ANIA_02413 ANIA_02761 ANIA_02904 ANIA_02917 ANI…
7.13964e-11	138	235	1.68005	Protein catabolic process	http://amigo.geneontology.org/amigo/term/GO:0030163	ANIA_00078 ANIA_00122 ANIA_00226 ANIA_00295 ANIA_00329 ANIA_00349 ANIA_00436 ANIA_00441 ANIA_00557 ANIA_00831 ANIA_00911 ANIA_00927 ANIA_01019 ANIA_01075 ANIA_01167 ANIA_01179 ANIA_01197 ANIA_01245 ANIA_01339 ANIA_01362 ANIA_01426 ANIA_01461 ANIA_01573 ANIA_01700 ANIA_01761 ANIA_01900 ANIA_01922 ANIA_01995 ANIA_02000 ANIA_02045 ANIA_02066 ANIA_02071 ANIA_02085 ANIA_02212 ANIA_02213 ANIA_02238 ANI…
7.13964e-11	115	186	1.76887	Ubiquitin-dependent protein catabolic process	http://amigo.geneontology.org/amigo/term/GO:0006511	ANIA_00078 ANIA_00226 ANIA_00295 ANIA_00329 ANIA_00436 ANIA_00441 ANIA_00557 ANIA_00831 ANIA_00911 ANIA_00927 ANIA_01019 ANIA_01075 ANIA_01167 ANIA_01179 ANIA_01245 ANIA_01339 ANIA_01362 ANIA_01461 ANIA_01700 ANIA_01761 ANIA_01900 ANIA_01922 ANIA_01995 ANIA_02045 ANIA_02066 ANIA_02071 ANIA_02085 ANIA_02212 ANIA_02213 ANIA_02238 ANIA_02302 ANIA_02413 ANIA_02761 ANIA_02904 ANIA_02917 ANIA_03003 ANI…
1.41737e-10	129	218	1.69295	Cellular protein catabolic process	http://amigo.geneontology.org/amigo/term/GO:0044257	ANIA_00078 ANIA_00122 ANIA_00226 ANIA_00295 ANIA_00329 ANIA_00436 ANIA_00441 ANIA_00557 ANIA_00831 ANIA_00911 ANIA_00927 ANIA_01019 ANIA_01075 ANIA_01167 ANIA_01179 ANIA_01197 ANIA_01245 ANIA_01339 ANIA_01362 ANIA_01426 ANIA_01461 ANIA_01700 ANIA_01761 ANIA_01900 ANIA_01922 ANIA_01995 ANIA_02000 ANIA_02045 ANIA_02066 ANIA_02071 ANIA_02085 ANIA_02212 ANIA_02213 ANIA_02238 ANIA_02302 ANIA_02312 ANI…
1.41737e-10	128	216	1.69538	Proteolysis involved in cellular protein catabolic process	http://amigo.geneontology.org/amigo/term/GO:0051603	ANIA_00078 ANIA_00122 ANIA_00226 ANIA_00295 ANIA_00329 ANIA_00436 ANIA_00441 ANIA_00557 ANIA_00831 ANIA_00911 ANIA_00927 ANIA_01019 ANIA_01075 ANIA_01167 ANIA_01179 ANIA_01197 ANIA_01245 ANIA_01339 ANIA_01362 ANIA_01426 ANIA_01461 ANIA_01700 ANIA_01761 ANIA_01900 ANIA_01922 ANIA_01995 ANIA_02000 ANIA_02045 ANIA_02066 ANIA_02071 ANIA_02085 ANIA_02212 ANIA_02213 ANIA_02238 ANIA_02302 ANIA_02413 ANI…
3.7786e-10	118	198	1.71367	Modification-dependent macromolecule catabolic process	http://amigo.geneontology.org/amigo/term/GO:0043632	ANIA_00078 ANIA_00226 ANIA_00295 ANIA_00329 ANIA_00436 ANIA_00441 ANIA_00557 ANIA_00831 ANIA_00911 ANIA_00927 ANIA_01019 ANIA_01075 ANIA_01167 ANIA_01179 ANIA_01245 ANIA_01339 ANIA_01362 ANIA_01461 ANIA_01700 ANIA_01761 ANIA_01900 ANIA_01922 ANIA_01995 ANIA_02000 ANIA_02045 ANIA_02066 ANIA_02071 ANIA_02085 ANIA_02212 ANIA_02213 ANIA_02238 ANIA_02302 ANIA_02413 ANIA_02761 ANIA_02904 ANIA_02917 ANI…
1.98265e-09	36	41	2.51206	Proteasome complex	http://amigo.geneontology.org/amigo/term/GO:0000502	ANIA_00557 ANIA_00927 ANIA_01167 ANIA_01245 ANIA_01700 ANIA_01922 ANIA_02085 ANIA_02213 ANIA_02904 ANIA_02917 ANIA_03019 ANIA_03493 ANIA_03716 ANIA_03756 ANIA_03932 ANIA_04236 ANIA_04449 ANIA_04457 ANIA_04492 ANIA_04731 ANIA_04775 ANIA_05121 ANIA_05607 ANIA_05747 ANIA_05774 ANIA_05784 ANIA_05793 ANIA_06547 ANIA_06726 ANIA_06988 ANIA_07579 ANIA_08054 ANIA_10020 ANIA_10337 ANIA_10519 ANIA_10708
4.40973e-08	83	133	1.78541	Proteasome-mediated ubiquitin-dependent protein catabolic process	http://amigo.geneontology.org/amigo/term/GO:0043161	ANIA_00226 ANIA_00329 ANIA_00436 ANIA_00557 ANIA_00831 ANIA_00911 ANIA_00927 ANIA_01019 ANIA_01075 ANIA_01179 ANIA_01245 ANIA_01339 ANIA_01461 ANIA_01700 ANIA_01922 ANIA_01995 ANIA_02045 ANIA_02085 ANIA_02212 ANIA_02213 ANIA_02238 ANIA_02302 ANIA_02413 ANIA_02904 ANIA_02917 ANIA_03019 ANIA_03111 ANIA_03449 ANIA_03493 ANIA_03566 ANIA_03689 ANIA_03756 ANIA_03932 ANIA_03999 ANIA_04236 ANIA_04411 ANI…
1.14157e-07	52	73	2.03794	Process utilizing autophagic mechanism	http://amigo.geneontology.org/amigo/term/GO:0061919	ANIA_00090 ANIA_00405 ANIA_00763 ANIA_01334 ANIA_01339 ANIA_01545 ANIA_01632 ANIA_01760 ANIA_01867 ANIA_02076 ANIA_02093 ANIA_02280 ANIA_02887 ANIA_03424 ANIA_03470 ANIA_03584 ANIA_03807 ANIA_04281 ANIA_04601 ANIA_04666 ANIA_04709 ANIA_04876 ANIA_04915 ANIA_05131 ANIA_05491 ANIA_05768 ANIA_05876 ANIA_05912 ANIA_05919 ANIA_05982 ANIA_06225 ANIA_06267 ANIA_06351 ANIA_06360 ANIA_06615 ANIA_06890 ANI…
1.14157e-07	52	73	2.03794	Autophagy	http://amigo.geneontology.org/amigo/term/GO:0006914	ANIA_00090 ANIA_00405 ANIA_00763 ANIA_01334 ANIA_01339 ANIA_01545 ANIA_01632 ANIA_01760 ANIA_01867 ANIA_02076 ANIA_02093 ANIA_02280 ANIA_02887 ANIA_03424 ANIA_03470 ANIA_03584 ANIA_03807 ANIA_04281 ANIA_04601 ANIA_04666 ANIA_04709 ANIA_04876 ANIA_04915 ANIA_05131 ANIA_05491 ANIA_05768 ANIA_05876 ANIA_05912 ANIA_05919 ANIA_05982 ANIA_06225 ANIA_06267 ANIA_06351 ANIA_06360 ANIA_06615 ANIA_06890 ANI…
1.23977e-07	37	46	2.3012	Endopeptidase complex	http://amigo.geneontology.org/amigo/term/GO:1905369	ANIA_00557 ANIA_00871 ANIA_00927 ANIA_01167 ANIA_01245 ANIA_01700 ANIA_01922 ANIA_02085 ANIA_02213 ANIA_02904 ANIA_02917 ANIA_03019 ANIA_03493 ANIA_03716 ANIA_03756 ANIA_03932 ANIA_04236 ANIA_04449 ANIA_04457 ANIA_04492 ANIA_04731 ANIA_04775 ANIA_05121 ANIA_05607 ANIA_05747 ANIA_05774 ANIA_05784 ANIA_05793 ANIA_06547 ANIA_06726 ANIA_06988 ANIA_07579 ANIA_08054 ANIA_10020 ANIA_10337 ANIA_10519 ANI…
1.40065e-07	84	138	1.74145	Proteasomal protein catabolic process	http://amigo.geneontology.org/amigo/term/GO:0010498	ANIA_00226 ANIA_00329 ANIA_00436 ANIA_00557 ANIA_00831 ANIA_00911 ANIA_00927 ANIA_01019 ANIA_01075 ANIA_01179 ANIA_01245 ANIA_01339 ANIA_01461 ANIA_01700 ANIA_01922 ANIA_01995 ANIA_02045 ANIA_02085 ANIA_02212 ANIA_02213 ANIA_02238 ANIA_02302 ANIA_02413 ANIA_02904 ANIA_02917 ANIA_03019 ANIA_03111 ANIA_03449 ANIA_03493 ANIA_03566 ANIA_03689 ANIA_03756 ANIA_03932 ANIA_03999 ANIA_04236 ANIA_04411 ANI…
2.85632e-06	190	393	1.3938	Proteolysis	http://amigo.geneontology.org/amigo/term/GO:0006508	ANIA_00078 ANIA_00122 ANIA_00226 ANIA_00256 ANIA_00295 ANIA_00329 ANIA_00349 ANIA_00369 ANIA_00436 ANIA_00441 ANIA_00557 ANIA_00831 ANIA_00832 ANIA_00871 ANIA_00911 ANIA_00927 ANIA_01019 ANIA_01075 ANIA_01092 ANIA_01104 ANIA_01167 ANIA_01179 ANIA_01197 ANIA_01245 ANIA_01320 ANIA_01339 ANIA_01362 ANIA_01426 ANIA_01461 ANIA_01539 ANIA_01573 ANIA_01700 ANIA_01761 ANIA_01850 ANIA_01900 ANIA_01922 ANI…
2.97285e-06	20	21	2.72472	Proteasome regulatory particle	http://amigo.geneontology.org/amigo/term/GO:0005838	ANIA_00557 ANIA_01167 ANIA_01245 ANIA_01700 ANIA_01922 ANIA_02213 ANIA_02904 ANIA_02917 ANIA_03019 ANIA_03716 ANIA_04236 ANIA_04492 ANIA_04775 ANIA_05121 ANIA_05747 ANIA_06988 ANIA_07579 ANIA_10020 ANIA_10337 ANIA_10519
2.97285e-06	20	21	2.72472	Proteasome accessory complex	http://amigo.geneontology.org/amigo/term/GO:0022624	ANIA_00557 ANIA_01167 ANIA_01245 ANIA_01700 ANIA_01922 ANIA_02213 ANIA_02904 ANIA_02917 ANIA_03019 ANIA_03716 ANIA_04236 ANIA_04492 ANIA_04775 ANIA_05121 ANIA_05747 ANIA_06988 ANIA_07579 ANIA_10020 ANIA_10337 ANIA_10519
6.78498e-06	394	918	1.24006	Response to stimulus	http://amigo.geneontology.org/amigo/term/GO:0050896	ANIA_00056 ANIA_00091 ANIA_00097 ANIA_00113 ANIA_00144 ANIA_00158 ANIA_00170 ANIA_00225 ANIA_00240 ANIA_00241 ANIA_00256 ANIA_00273 ANIA_00281 ANIA_00329 ANIA_00363 ANIA_00387 ANIA_00408 ANIA_00432 ANIA_00437 ANIA_00556 ANIA_00598 ANIA_00604 ANIA_00656 ANIA_00658 ANIA_00670 ANIA_00671 ANIA_00696 ANIA_00718 ANIA_00766 ANIA_00797 ANIA_00825 ANIA_00858 ANIA_00863 ANIA_00881 ANIA_00927 ANIA_00931 ANI…
8.20693e-06	42	60	2.00267	Vacuolar transport	http://amigo.geneontology.org/amigo/term/GO:0007034	ANIA_00255 ANIA_00627 ANIA_00831 ANIA_01334 ANIA_01339 ANIA_01365 ANIA_01973 ANIA_02066 ANIA_02071 ANIA_02093 ANIA_03003 ANIA_03144 ANIA_03842 ANIA_04095 ANIA_04240 ANIA_04416 ANIA_04477 ANIA_04478 ANIA_04876 ANIA_04915 ANIA_05579 ANIA_05632 ANIA_05668 ANIA_05912 ANIA_06544 ANIA_06546 ANIA_06898 ANIA_06920 ANIA_07106 ANIA_07437 ANIA_07501 ANIA_07591 ANIA_07777 ANIA_07993 ANIA_08291 ANIA_09396 ANI…
4.29081e-05	19	21	2.58848	Iron-sulfur cluster assembly	http://amigo.geneontology.org/amigo/term/GO:0016226	ANIA_00447 ANIA_01385 ANIA_01407 ANIA_01469 ANIA_01986 ANIA_02155 ANIA_02508 ANIA_03632 ANIA_03686 ANIA_04304 ANIA_04655 ANIA_05528 ANIA_05953 ANIA_08485 ANIA_10012 ANIA_10237 ANIA_10283 ANIA_10584 ANIA_11060
4.29081e-05	19	21	2.58848	Metallo-sulfur cluster assembly	http://amigo.geneontology.org/amigo/term/GO:0031163	ANIA_00447 ANIA_01385 ANIA_01407 ANIA_01469 ANIA_01986 ANIA_02155 ANIA_02508 ANIA_03632 ANIA_03686 ANIA_04304 ANIA_04655 ANIA_05528 ANIA_05953 ANIA_08485 ANIA_10012 ANIA_10237 ANIA_10283 ANIA_10584 ANIA_11060
4.29081e-05	19	23	2.58848	Proteasome	http://www.genome.jp/kegg-bin/show_pathway?ani03050	ANIA_01700 ANIA_01922 ANIA_02085 ANIA_02213 ANIA_02917 ANIA_03493 ANIA_03716 ANIA_03756 ANIA_03932 ANIA_04236 ANIA_04449 ANIA_04731 ANIA_04775 ANIA_05607 ANIA_05784 ANIA_05793 ANIA_06547 ANIA_06726 ANIA_06988
5.23856e-05	232	515	1.30401	Response to stress	http://amigo.geneontology.org/amigo/term/GO:0006950	ANIA_00091 ANIA_00097 ANIA_00158 ANIA_00170 ANIA_00241 ANIA_00273 ANIA_00329 ANIA_00387 ANIA_00432 ANIA_00437 ANIA_00556 ANIA_00598 ANIA_00604 ANIA_00656 ANIA_00670 ANIA_00671 ANIA_00825 ANIA_00858 ANIA_00881 ANIA_00927 ANIA_00931 ANIA_00932 ANIA_00988 ANIA_01017 ANIA_01149 ANIA_01163 ANIA_01231 ANIA_01237 ANIA_01245 ANIA_01364 ANIA_01461 ANIA_01639 ANIA_01665 ANIA_01668 ANIA_01731 ANIA_01795 ANI…
6.18471e-05	364	857	1.22805	Cellular response to stimulus	http://amigo.geneontology.org/amigo/term/GO:0051716	ANIA_00056 ANIA_00091 ANIA_00097 ANIA_00113 ANIA_00144 ANIA_00158 ANIA_00170 ANIA_00240 ANIA_00241 ANIA_00256 ANIA_00273 ANIA_00281 ANIA_00329 ANIA_00363 ANIA_00387 ANIA_00408 ANIA_00432 ANIA_00437 ANIA_00556 ANIA_00598 ANIA_00604 ANIA_00656 ANIA_00658 ANIA_00670 ANIA_00671 ANIA_00696 ANIA_00718 ANIA_00766 ANIA_00797 ANIA_00825 ANIA_00858 ANIA_00863 ANIA_00881 ANIA_00927 ANIA_00931 ANIA_00932 ANI…
8.2338e-05	71	126	1.62502	Cellular amino acid biosynthetic process	http://amigo.geneontology.org/amigo/term/GO:0008652	ANIA_00354 ANIA_00648 ANIA_00717 ANIA_00797 ANIA_00840 ANIA_00912 ANIA_01150 ANIA_01446 ANIA_01810 ANIA_01883 ANIA_01990 ANIA_02042 ANIA_02229 ANIA_02243 ANIA_02410 ANIA_02525 ANIA_02526 ANIA_02793 ANIA_02873 ANIA_02882 ANIA_02914 ANIA_03031 ANIA_03695 ANIA_03748 ANIA_03830 ANIA_04159 ANIA_04323 ANIA_04345 ANIA_04355 ANIA_04376 ANIA_04401 ANIA_04409 ANIA_04430 ANIA_04770 ANIA_04793 ANIA_04956 ANI…
8.74732e-05	36	54	1.98066	Organelle fusion	http://amigo.geneontology.org/amigo/term/GO:0048284	ANIA_00089 ANIA_00281 ANIA_00571 ANIA_00573 ANIA_00627 ANIA_00763 ANIA_01085 ANIA_01093 ANIA_01229 ANIA_01334 ANIA_01973 ANIA_02048 ANIA_02169 ANIA_02266 ANIA_02419 ANIA_03144 ANIA_03752 ANIA_03842 ANIA_04416 ANIA_04537 ANIA_04557 ANIA_04876 ANIA_05125 ANIA_05181 ANIA_06267 ANIA_06337 ANIA_06618 ANIA_06890 ANIA_07444 ANIA_07729 ANIA_08769 ANIA_09526 ANIA_10190 ANIA_10849 ANIA_11010 ANIA_12408
0.000161349	34	49	1.98515	Endosome membrane	http://amigo.geneontology.org/amigo/term/GO:0010008	ANIA_00255 ANIA_00256 ANIA_00627 ANIA_00831 ANIA_01335 ANIA_01339 ANIA_01365 ANIA_01973 ANIA_02066 ANIA_02071 ANIA_02093 ANIA_02224 ANIA_02736 ANIA_03144 ANIA_03188 ANIA_03584 ANIA_03594 ANIA_03842 ANIA_04240 ANIA_05211 ANIA_05919 ANIA_06351 ANIA_06544 ANIA_06898 ANIA_06920 ANIA_06932 ANIA_07106 ANIA_07560 ANIA_08291 ANIA_09396 ANIA_10129 ANIA_10594 ANIA_10682 ANIA_11164
0.000175664	177	384	1.33612	Bounding membrane of organelle	http://amigo.geneontology.org/amigo/term/GO:0098588	ANIA_00089 ANIA_00090 ANIA_00110 ANIA_00201 ANIA_00225 ANIA_00255 ANIA_00256 ANIA_00257 ANIA_00275 ANIA_00411 ANIA_00432 ANIA_00580 ANIA_00627 ANIA_00700 ANIA_00732 ANIA_00763 ANIA_00831 ANIA_00861 ANIA_01014 ANIA_01195 ANIA_01211 ANIA_01229 ANIA_01243 ANIA_01297 ANIA_01334 ANIA_01335 ANIA_01339 ANIA_01365 ANIA_01412 ANIA_01483 ANIA_01511 ANIA_01545 ANIA_01574 ANIA_01593 ANIA_01753 ANIA_01766 ANI…
0.000211006	211	471	1.2982	Cellular response to stress	http://amigo.geneontology.org/amigo/term/GO:0033554	ANIA_00091 ANIA_00097 ANIA_00158 ANIA_00170 ANIA_00241 ANIA_00273 ANIA_00329 ANIA_00387 ANIA_00432 ANIA_00437 ANIA_00556 ANIA_00598 ANIA_00604 ANIA_00656 ANIA_00670 ANIA_00671 ANIA_00825 ANIA_00858 ANIA_00881 ANIA_00927 ANIA_00931 ANIA_00932 ANIA_00988 ANIA_01017 ANIA_01149 ANIA_01163 ANIA_01231 ANIA_01237 ANIA_01245 ANIA_01364 ANIA_01461 ANIA_01639 ANIA_01665 ANIA_01668 ANIA_01731 ANIA_01800 ANI…
0.000211006	195	428	1.31267	Organonitrogen compound catabolic process	http://amigo.geneontology.org/amigo/term/GO:1901565	ANIA_00078 ANIA_00122 ANIA_00226 ANIA_00295 ANIA_00299 ANIA_00300 ANIA_00329 ANIA_00349 ANIA_00401 ANIA_00436 ANIA_00441 ANIA_00557 ANIA_00662 ANIA_00831 ANIA_00859 ANIA_00891 ANIA_00911 ANIA_00927 ANIA_01019 ANIA_01075 ANIA_01092 ANIA_01167 ANIA_01179 ANIA_01197 ANIA_01198 ANIA_01245 ANIA_01339 ANIA_01362 ANIA_01418 ANIA_01426 ANIA_01461 ANIA_01522 ANIA_01541 ANIA_01573 ANIA_01700 ANIA_01731 ANI…
0.000228164	89	174	1.50666	Vacuolar membrane	http://amigo.geneontology.org/amigo/term/GO:0005774	ANIA_00089 ANIA_00090 ANIA_00110 ANIA_00201 ANIA_00225 ANIA_00275 ANIA_00580 ANIA_00700 ANIA_00732 ANIA_00763 ANIA_00831 ANIA_01195 ANIA_01211 ANIA_01243 ANIA_01334 ANIA_01412 ANIA_01545 ANIA_01574 ANIA_01766 ANIA_01795 ANIA_02053 ANIA_02070 ANIA_02093 ANIA_02312 ANIA_02358 ANIA_02531 ANIA_02675 ANIA_02746 ANIA_02840 ANIA_02887 ANIA_02946 ANIA_03088 ANIA_03722 ANIA_03934 ANIA_04238 ANIA_04241 ANI…
0.000285367	35	53	1.92564	Vacuole organization	http://amigo.geneontology.org/amigo/term/GO:0007033	ANIA_00089 ANIA_00090 ANIA_00405 ANIA_00627 ANIA_01334 ANIA_01545 ANIA_01760 ANIA_02076 ANIA_02266 ANIA_02280 ANIA_02887 ANIA_03061 ANIA_03144 ANIA_03470 ANIA_03842 ANIA_04281 ANIA_04666 ANIA_04709 ANIA_04876 ANIA_04915 ANIA_05125 ANIA_05491 ANIA_05912 ANIA_06267 ANIA_06337 ANIA_06360 ANIA_07030 ANIA_07311 ANIA_07428 ANIA_07729 ANIA_10213 ANIA_10849 ANIA_11004 ANIA_11055 ANIA_12408
0.000415274	179	393	1.31648	Response to chemical	http://amigo.geneontology.org/amigo/term/GO:0042221	ANIA_00158 ANIA_00170 ANIA_00225 ANIA_00240 ANIA_00241 ANIA_00273 ANIA_00329 ANIA_00408 ANIA_00432 ANIA_00656 ANIA_00670 ANIA_00671 ANIA_00718 ANIA_00797 ANIA_00825 ANIA_00858 ANIA_00863 ANIA_00927 ANIA_00931 ANIA_00932 ANIA_00988 ANIA_01017 ANIA_01050 ANIA_01076 ANIA_01149 ANIA_01163 ANIA_01252 ANIA_01396 ANIA_01406 ANIA_01461 ANIA_01639 ANIA_01795 ANIA_01800 ANIA_01812 ANIA_01853 ANIA_01986 ANI…
0.000447713	62	111	1.61254	Endosome	http://amigo.geneontology.org/amigo/term/GO:0005768	ANIA_00089 ANIA_00255 ANIA_00256 ANIA_00627 ANIA_00831 ANIA_00861 ANIA_01335 ANIA_01339 ANIA_01341 ANIA_01365 ANIA_01973 ANIA_02048 ANIA_02066 ANIA_02071 ANIA_02093 ANIA_02224 ANIA_02266 ANIA_02521 ANIA_02736 ANIA_03003 ANIA_03144 ANIA_03188 ANIA_03584 ANIA_03594 ANIA_03696 ANIA_03842 ANIA_04095 ANIA_04240 ANIA_04274 ANIA_04615 ANIA_04637 ANIA_04709 ANIA_04876 ANIA_04915 ANIA_05211 ANIA_05491 ANI…
0.000448121	41	65	1.8046	Peptidase complex	http://amigo.geneontology.org/amigo/term/GO:1905368	ANIA_00557 ANIA_00871 ANIA_00927 ANIA_01092 ANIA_01167 ANIA_01245 ANIA_01700 ANIA_01922 ANIA_02085 ANIA_02213 ANIA_02769 ANIA_02904 ANIA_02917 ANIA_03019 ANIA_03493 ANIA_03716 ANIA_03756 ANIA_03932 ANIA_04236 ANIA_04449 ANIA_04457 ANIA_04492 ANIA_04557 ANIA_04731 ANIA_04775 ANIA_05121 ANIA_05607 ANIA_05747 ANIA_05774 ANIA_05784 ANIA_05793 ANIA_06547 ANIA_06726 ANIA_06988 ANIA_07579 ANIA_08054 ANI…
0.000470682	117	244	1.40643	Vacuole	http://amigo.geneontology.org/amigo/term/GO:0005773	ANIA_00089 ANIA_00090 ANIA_00110 ANIA_00201 ANIA_00225 ANIA_00275 ANIA_00580 ANIA_00700 ANIA_00732 ANIA_00763 ANIA_00831 ANIA_01021 ANIA_01076 ANIA_01195 ANIA_01211 ANIA_01243 ANIA_01334 ANIA_01412 ANIA_01426 ANIA_01527 ANIA_01545 ANIA_01574 ANIA_01766 ANIA_01795 ANIA_02053 ANIA_02070 ANIA_02093 ANIA_02312 ANIA_02342 ANIA_02358 ANIA_02531 ANIA_02651 ANIA_02675 ANIA_02746 ANIA_02840 ANIA_02887 ANI…
0.000646655	20	25	2.28876	Late endosome to vacuole transport	http://amigo.geneontology.org/amigo/term/GO:0045324	ANIA_00255 ANIA_00831 ANIA_01339 ANIA_01365 ANIA_02066 ANIA_02071 ANIA_03003 ANIA_04240 ANIA_04915 ANIA_05579 ANIA_05632 ANIA_06544 ANIA_06546 ANIA_06898 ANIA_06920 ANIA_07106 ANIA_07501 ANIA_09396 ANIA_10129 ANIA_10213
0.000674636	41	68	1.77726	Vesicle organization	http://amigo.geneontology.org/amigo/term/GO:0016050	ANIA_00089 ANIA_00281 ANIA_00411 ANIA_00571 ANIA_00573 ANIA_00627 ANIA_00763 ANIA_01229 ANIA_01365 ANIA_01973 ANIA_02011 ANIA_02048 ANIA_02169 ANIA_02224 ANIA_02266 ANIA_02419 ANIA_03144 ANIA_03584 ANIA_03594 ANIA_03752 ANIA_03842 ANIA_04240 ANIA_04416 ANIA_04537 ANIA_04876 ANIA_04915 ANIA_05632 ANIA_05919 ANIA_06267 ANIA_06351 ANIA_06615 ANIA_06618 ANIA_06890 ANIA_07444 ANIA_08769 ANIA_09526 ANI…
0.000674636	337	809	1.20668	Cellular catabolic process	http://amigo.geneontology.org/amigo/term/GO:0044248	ANIA_00078 ANIA_00090 ANIA_00122 ANIA_00226 ANIA_00295 ANIA_00300 ANIA_00329 ANIA_00401 ANIA_00405 ANIA_00436 ANIA_00441 ANIA_00472 ANIA_00494 ANIA_00505 ANIA_00557 ANIA_00632 ANIA_00662 ANIA_00689 ANIA_00763 ANIA_00802 ANIA_00831 ANIA_00859 ANIA_00868 ANIA_00874 ANIA_00891 ANIA_00911 ANIA_00927 ANIA_01014 ANIA_01016 ANIA_01019 ANIA_01050 ANIA_01057 ANIA_01075 ANIA_01092 ANIA_01137 ANIA_01167 ANI…
0.000674636	27	40	2.03278	Organelle membrane fusion	http://amigo.geneontology.org/amigo/term/GO:0090174	ANIA_00281 ANIA_00571 ANIA_00573 ANIA_00627 ANIA_00763 ANIA_01085 ANIA_01229 ANIA_01973 ANIA_02048 ANIA_02169 ANIA_02266 ANIA_02419 ANIA_03144 ANIA_03752 ANIA_03842 ANIA_04416 ANIA_04537 ANIA_04876 ANIA_06267 ANIA_06618 ANIA_06890 ANIA_07444 ANIA_08769 ANIA_09526 ANIA_10190 ANIA_10849 ANIA_11010
0.000674636	17	20	2.43181	Phagophore assembly site	http://amigo.geneontology.org/amigo/term/GO:0000407	ANIA_00090 ANIA_01632 ANIA_01760 ANIA_02076 ANIA_02280 ANIA_02887 ANIA_03584 ANIA_04601 ANIA_04666 ANIA_04709 ANIA_05131 ANIA_05491 ANIA_06360 ANIA_07311 ANIA_07428 ANIA_10213 ANIA_10594
0.000674636	26	38	2.06624	Vesicle fusion	http://amigo.geneontology.org/amigo/term/GO:0006906	ANIA_00281 ANIA_00571 ANIA_00573 ANIA_00627 ANIA_00763 ANIA_01229 ANIA_01973 ANIA_02048 ANIA_02169 ANIA_02266 ANIA_02419 ANIA_03144 ANIA_03752 ANIA_03842 ANIA_04416 ANIA_04537 ANIA_04876 ANIA_06267 ANIA_06618 ANIA_06890 ANIA_07444 ANIA_08769 ANIA_09526 ANIA_10190 ANIA_10849 ANIA_11010
0.000776545	62	112	1.58374	Cellular response to chemical stress	http://amigo.geneontology.org/amigo/term/GO:0062197	ANIA_00158 ANIA_00170 ANIA_00241 ANIA_00273 ANIA_00432 ANIA_00656 ANIA_00670 ANIA_00931 ANIA_00932 ANIA_00988 ANIA_01017 ANIA_01149 ANIA_01639 ANIA_01800 ANIA_01853 ANIA_01986 ANIA_02005 ANIA_02238 ANIA_02343 ANIA_02846 ANIA_02882 ANIA_02911 ANIA_02919 ANIA_03004 ANIA_03339 ANIA_03522 ANIA_03581 ANIA_03687 ANIA_03688 ANIA_03697 ANIA_03838 ANIA_03973 ANIA_04029 ANIA_04215 ANIA_04238 ANIA_04304 ANI…
0.000792668	52	92	1.65299	Ubiquitin-protein transferase activity	http://amigo.geneontology.org/amigo/term/GO:0004842	ANIA_00226 ANIA_00436 ANIA_00441 ANIA_01019 ANIA_01075 ANIA_01179 ANIA_01339 ANIA_01746 ANIA_01761 ANIA_01874 ANIA_01900 ANIA_01995 ANIA_02212 ANIA_02302 ANIA_02413 ANIA_02761 ANIA_03039 ANIA_03447 ANIA_03644 ANIA_03689 ANIA_03999 ANIA_04359 ANIA_04455 ANIA_04637 ANIA_05344 ANIA_05906 ANIA_05961 ANIA_06049 ANIA_06052 ANIA_06609 ANIA_06894 ANIA_06905 ANIA_07431 ANIA_07577 ANIA_08258 ANIA_08702 ANI…
0.000927194	55	99	1.62219	Ubiquitin-like protein transferase activity	http://amigo.geneontology.org/amigo/term/GO:0019787	ANIA_00226 ANIA_00436 ANIA_00441 ANIA_01019 ANIA_01075 ANIA_01179 ANIA_01339 ANIA_01746 ANIA_01760 ANIA_01761 ANIA_01874 ANIA_01900 ANIA_01995 ANIA_02212 ANIA_02302 ANIA_02413 ANIA_02761 ANIA_03039 ANIA_03447 ANIA_03644 ANIA_03689 ANIA_03999 ANIA_04359 ANIA_04455 ANIA_04637 ANIA_05344 ANIA_05906 ANIA_05961 ANIA_06049 ANIA_06052 ANIA_06609 ANIA_06894 ANIA_06905 ANIA_07431 ANIA_07577 ANIA_08258 ANI…
0.000931141	11	11	2.86095	Proteasome storage granule	http://amigo.geneontology.org/amigo/term/GO:0034515	ANIA_01245 ANIA_01700 ANIA_02085 ANIA_03756 ANIA_05793 ANIA_06547 ANIA_06726 ANIA_08054 ANIA_10020 ANIA_10519 ANIA_10708
0.000931141	42	69	1.74145	Glutamine family amino acid metabolic process	http://amigo.geneontology.org/amigo/term/GO:0009064	ANIA_00200 ANIA_00202 ANIA_00300 ANIA_00648 ANIA_01092 ANIA_01150 ANIA_01541 ANIA_01731 ANIA_01810 ANIA_01883 ANIA_02243 ANIA_02901 ANIA_02914 ANIA_03829 ANIA_04050 ANIA_04159 ANIA_04355 ANIA_04376 ANIA_04401 ANIA_04409 ANIA_04809 ANIA_04901 ANIA_05799 ANIA_05817 ANIA_05867 ANIA_05999 ANIA_06022 ANIA_06025 ANIA_06550 ANIA_07315 ANIA_07430 ANIA_07451 ANIA_07669 ANIA_07722 ANIA_08121 ANIA_08169 ANI…
0.00104276	47	80	1.68081	Cellular response to oxidative stress	http://amigo.geneontology.org/amigo/term/GO:0034599	ANIA_00158 ANIA_00170 ANIA_00241 ANIA_00273 ANIA_00432 ANIA_00932 ANIA_00988 ANIA_01017 ANIA_01149 ANIA_01639 ANIA_01853 ANIA_01986 ANIA_02343 ANIA_02846 ANIA_02911 ANIA_03004 ANIA_03339 ANIA_03581 ANIA_03687 ANIA_03688 ANIA_03697 ANIA_03838 ANIA_03973 ANIA_04215 ANIA_04238 ANIA_04304 ANIA_04483 ANIA_04668 ANIA_05324 ANIA_05440 ANIA_05523 ANIA_05577 ANIA_05611 ANIA_05755 ANIA_05918 ANIA_06024 ANI…
0.00104276	85	167	1.46495	Protein modification by small protein conjugation or removal	http://amigo.geneontology.org/amigo/term/GO:0070647	ANIA_00056 ANIA_00226 ANIA_00436 ANIA_00441 ANIA_00450 ANIA_00911 ANIA_00927 ANIA_01019 ANIA_01075 ANIA_01179 ANIA_01191 ANIA_01245 ANIA_01339 ANIA_01539 ANIA_01746 ANIA_01761 ANIA_01874 ANIA_01900 ANIA_01995 ANIA_02000 ANIA_02072 ANIA_02212 ANIA_02214 ANIA_02233 ANIA_02267 ANIA_02302 ANIA_02413 ANIA_02450 ANIA_02761 ANIA_03003 ANIA_03039 ANIA_03447 ANIA_03449 ANIA_03644 ANIA_03689 ANIA_03999 ANI…
0.00106764	19	24	2.26492	Endosome transport via multivesicular body sorting pathway	http://amigo.geneontology.org/amigo/term/GO:0032509	ANIA_00255 ANIA_00831 ANIA_01339 ANIA_01365 ANIA_02066 ANIA_02071 ANIA_02312 ANIA_03003 ANIA_04240 ANIA_04915 ANIA_05632 ANIA_06544 ANIA_06546 ANIA_06898 ANIA_06920 ANIA_07106 ANIA_07501 ANIA_09396 ANIA_10129
0.00106764	19	24	2.26492	Multivesicular body sorting pathway	http://amigo.geneontology.org/amigo/term/GO:0071985	ANIA_00255 ANIA_00831 ANIA_01339 ANIA_01365 ANIA_02066 ANIA_02071 ANIA_02312 ANIA_03003 ANIA_04240 ANIA_04915 ANIA_05632 ANIA_06544 ANIA_06546 ANIA_06898 ANIA_06920 ANIA_07106 ANIA_07501 ANIA_09396 ANIA_10129
0.00112747	60	110	1.57484	Protein ubiquitination	http://amigo.geneontology.org/amigo/term/GO:0016567	ANIA_00056 ANIA_00226 ANIA_00436 ANIA_00441 ANIA_00911 ANIA_01019 ANIA_01075 ANIA_01179 ANIA_01339 ANIA_01746 ANIA_01761 ANIA_01874 ANIA_01900 ANIA_01995 ANIA_02000 ANIA_02212 ANIA_02214 ANIA_02302 ANIA_02413 ANIA_02761 ANIA_03039 ANIA_03447 ANIA_03644 ANIA_03689 ANIA_03999 ANIA_04271 ANIA_04359 ANIA_04455 ANIA_04637 ANIA_05209 ANIA_05344 ANIA_05668 ANIA_05906 ANIA_05961 ANIA_06049 ANIA_06052 ANI…
0.00136369	42	70	1.71657	Ubiquitin protein ligase activity	http://amigo.geneontology.org/amigo/term/GO:0061630	ANIA_00226 ANIA_00441 ANIA_01075 ANIA_01179 ANIA_01339 ANIA_01746 ANIA_01761 ANIA_01874 ANIA_01900 ANIA_01995 ANIA_02212 ANIA_02302 ANIA_02413 ANIA_03039 ANIA_03447 ANIA_03644 ANIA_03689 ANIA_03999 ANIA_04359 ANIA_04455 ANIA_04637 ANIA_05344 ANIA_05906 ANIA_05961 ANIA_06049 ANIA_06052 ANIA_06609 ANIA_06894 ANIA_07431 ANIA_07577 ANIA_08258 ANIA_08702 ANIA_08844 ANIA_09320 ANIA_09421 ANIA_09437 ANI…
0.00202206	43	74	1.68522	Lipid binding	http://amigo.geneontology.org/amigo/term/GO:0008289	ANIA_01339 ANIA_01377 ANIA_01606 ANIA_02071 ANIA_02224 ANIA_02236 ANIA_02427 ANIA_02516 ANIA_02756 ANIA_02877 ANIA_03424 ANIA_03452 ANIA_03584 ANIA_03594 ANIA_03627 ANIA_03696 ANIA_03725 ANIA_03738 ANIA_03807 ANIA_03931 ANIA_04168 ANIA_04666 ANIA_04995 ANIA_05131 ANIA_05217 ANIA_05491 ANIA_05624 ANIA_05671 ANIA_05879 ANIA_05981 ANIA_06169 ANIA_06351 ANIA_06752 ANIA_07030 ANIA_07760 ANIA_08831 ANI…
0.00213349	42	71	1.69239	Ubiquitin-like protein ligase activity	http://amigo.geneontology.org/amigo/term/GO:0061659	ANIA_00226 ANIA_00441 ANIA_01075 ANIA_01179 ANIA_01339 ANIA_01746 ANIA_01761 ANIA_01874 ANIA_01900 ANIA_01995 ANIA_02212 ANIA_02302 ANIA_02413 ANIA_03039 ANIA_03447 ANIA_03644 ANIA_03689 ANIA_03999 ANIA_04359 ANIA_04455 ANIA_04637 ANIA_05344 ANIA_05906 ANIA_05961 ANIA_06049 ANIA_06052 ANIA_06609 ANIA_06894 ANIA_07431 ANIA_07577 ANIA_08258 ANIA_08702 ANIA_08844 ANIA_09320 ANIA_09421 ANIA_09437 ANI…
0.00215778	29	44	1.88563	Macroautophagy	http://amigo.geneontology.org/amigo/term/GO:0016236	ANIA_00090 ANIA_00405 ANIA_01339 ANIA_01545 ANIA_01760 ANIA_01867 ANIA_02076 ANIA_02280 ANIA_02887 ANIA_03470 ANIA_04281 ANIA_04666 ANIA_04709 ANIA_04876 ANIA_04915 ANIA_05131 ANIA_05491 ANIA_05912 ANIA_05919 ANIA_05982 ANIA_06360 ANIA_07311 ANIA_07428 ANIA_09461 ANIA_10213 ANIA_10956 ANIA_11004 ANIA_11055 ANIA_12408
0.00215778	10	10	2.86095	Proteasome regulatory particle, base subcomplex	http://amigo.geneontology.org/amigo/term/GO:0008540	ANIA_00557 ANIA_01700 ANIA_02213 ANIA_02904 ANIA_02917 ANIA_04236 ANIA_05747 ANIA_06988 ANIA_07579 ANIA_10020
0.00215778	29	44	1.88563	Protein polyubiquitination	http://amigo.geneontology.org/amigo/term/GO:0000209	ANIA_00226 ANIA_00911 ANIA_01075 ANIA_01339 ANIA_01761 ANIA_02212 ANIA_02413 ANIA_02761 ANIA_03039 ANIA_03644 ANIA_03689 ANIA_03999 ANIA_04271 ANIA_05344 ANIA_05906 ANIA_05961 ANIA_06359 ANIA_06609 ANIA_06894 ANIA_07577 ANIA_08258 ANIA_08702 ANIA_09320 ANIA_10324 ANIA_10365 ANIA_10556 ANIA_10707 ANIA_10792 ANIA_10994
0.00252977	65	124	1.51189	Protein modification by small protein conjugation	http://amigo.geneontology.org/amigo/term/GO:0032446	ANIA_00056 ANIA_00226 ANIA_00436 ANIA_00441 ANIA_00450 ANIA_00911 ANIA_01019 ANIA_01075 ANIA_01179 ANIA_01191 ANIA_01339 ANIA_01746 ANIA_01761 ANIA_01874 ANIA_01900 ANIA_01995 ANIA_02000 ANIA_02212 ANIA_02214 ANIA_02302 ANIA_02413 ANIA_02450 ANIA_02761 ANIA_03039 ANIA_03447 ANIA_03644 ANIA_03689 ANIA_03999 ANIA_04271 ANIA_04359 ANIA_04455 ANIA_04637 ANIA_05209 ANIA_05344 ANIA_05668 ANIA_05906 ANI…
0.00301026	56	104	1.55547	Alpha-amino acid biosynthetic process	http://amigo.geneontology.org/amigo/term/GO:1901607	ANIA_00648 ANIA_01150 ANIA_01446 ANIA_01810 ANIA_01883 ANIA_01990 ANIA_02042 ANIA_02229 ANIA_02243 ANIA_02410 ANIA_02525 ANIA_02526 ANIA_02873 ANIA_02882 ANIA_02914 ANIA_03031 ANIA_03695 ANIA_03830 ANIA_04159 ANIA_04345 ANIA_04355 ANIA_04376 ANIA_04401 ANIA_04409 ANIA_04430 ANIA_04770 ANIA_04793 ANIA_04956 ANIA_05206 ANIA_05444 ANIA_05525 ANIA_05601 ANIA_05610 ANIA_05799 ANIA_05817 ANIA_05867 ANI…
0.00362927	16	20	2.28876	Late endosome to vacuole transport via multivesicular body sorting pathway	http://amigo.geneontology.org/amigo/term/GO:0032511	ANIA_00255 ANIA_00831 ANIA_01339 ANIA_01365 ANIA_02066 ANIA_02071 ANIA_03003 ANIA_04240 ANIA_04915 ANIA_05632 ANIA_06544 ANIA_06546 ANIA_07106 ANIA_07501 ANIA_09396 ANIA_10129
0.00387721	96	204	1.38713	Lytic vacuole	http://amigo.geneontology.org/amigo/term/GO:0000323	ANIA_00089 ANIA_00201 ANIA_00225 ANIA_00275 ANIA_00700 ANIA_00732 ANIA_00763 ANIA_01021 ANIA_01076 ANIA_01211 ANIA_01243 ANIA_01334 ANIA_01412 ANIA_01426 ANIA_01545 ANIA_01766 ANIA_01795 ANIA_02053 ANIA_02070 ANIA_02093 ANIA_02312 ANIA_02342 ANIA_02358 ANIA_02531 ANIA_02651 ANIA_02675 ANIA_02746 ANIA_02840 ANIA_02903 ANIA_03125 ANIA_03722 ANIA_03793 ANIA_03934 ANIA_04238 ANIA_04241 ANIA_04328 ANI…
0.00554333	97	204	1.37382	Alpha-amino acid metabolic process	http://amigo.geneontology.org/amigo/term/GO:1901605	ANIA_00200 ANIA_00202 ANIA_00300 ANIA_00401 ANIA_00648 ANIA_01092 ANIA_01150 ANIA_01198 ANIA_01446 ANIA_01541 ANIA_01731 ANIA_01745 ANIA_01810 ANIA_01883 ANIA_01897 ANIA_01899 ANIA_01990 ANIA_01993 ANIA_02042 ANIA_02229 ANIA_02243 ANIA_02410 ANIA_02509 ANIA_02525 ANIA_02526 ANIA_02873 ANIA_02882 ANIA_02901 ANIA_02914 ANIA_03031 ANIA_03456 ANIA_03695 ANIA_03829 ANIA_03830 ANIA_04050 ANIA_04081 ANI…
0.00554333	9	9	2.86095	Proteasome regulatory particle, lid subcomplex	http://amigo.geneontology.org/amigo/term/GO:0008541	ANIA_01167 ANIA_01245 ANIA_01922 ANIA_03019 ANIA_03716 ANIA_04492 ANIA_04775 ANIA_10337 ANIA_10519
0.00562604	19	26	2.0907	Autophagosome assembly	http://amigo.geneontology.org/amigo/term/GO:0000045	ANIA_00090 ANIA_00405 ANIA_01545 ANIA_01760 ANIA_02076 ANIA_02280 ANIA_02887 ANIA_03470 ANIA_04281 ANIA_04666 ANIA_04709 ANIA_05491 ANIA_05912 ANIA_06360 ANIA_07311 ANIA_07428 ANIA_10213 ANIA_11004 ANIA_11055
0.00562604	14	17	2.35608	Autophagy of nucleus	http://amigo.geneontology.org/amigo/term/GO:0044804	ANIA_01760 ANIA_02076 ANIA_03424 ANIA_03470 ANIA_03807 ANIA_04666 ANIA_05491 ANIA_05919 ANIA_06360 ANIA_07311 ANIA_07428 ANIA_10213 ANIA_11004 ANIA_12408
0.00562604	19	26	2.0907	Autophagosome organization	http://amigo.geneontology.org/amigo/term/GO:1905037	ANIA_00090 ANIA_00405 ANIA_01545 ANIA_01760 ANIA_02076 ANIA_02280 ANIA_02887 ANIA_03470 ANIA_04281 ANIA_04666 ANIA_04709 ANIA_05491 ANIA_05912 ANIA_06360 ANIA_07311 ANIA_07428 ANIA_10213 ANIA_11004 ANIA_11055
0.00562604	288	696	1.19241	Mitochondrion	http://amigo.geneontology.org/amigo/term/GO:0005739	ANIA_00066 ANIA_00206 ANIA_00257 ANIA_00349 ANIA_00432 ANIA_00447 ANIA_00604 ANIA_00630 ANIA_00670 ANIA_00716 ANIA_00795 ANIA_00840 ANIA_00859 ANIA_00861 ANIA_00874 ANIA_00932 ANIA_00947 ANIA_00952 ANIA_01003 ANIA_01022 ANIA_01059 ANIA_01066 ANIA_01083 ANIA_01093 ANIA_01104 ANIA_01149 ANIA_01150 ANIA_01163 ANIA_01193 ANIA_01198 ANIA_01231 ANIA_01269 ANIA_01305 ANIA_01376 ANIA_01396 ANIA_01467 ANI…
0.00562604	52	96	1.54968	Response to oxidative stress	http://amigo.geneontology.org/amigo/term/GO:0006979	ANIA_00158 ANIA_00170 ANIA_00241 ANIA_00273 ANIA_00432 ANIA_00932 ANIA_00988 ANIA_01017 ANIA_01149 ANIA_01639 ANIA_01853 ANIA_01932 ANIA_01936 ANIA_01986 ANIA_02103 ANIA_02343 ANIA_02846 ANIA_02911 ANIA_02981 ANIA_03004 ANIA_03339 ANIA_03581 ANIA_03687 ANIA_03688 ANIA_03697 ANIA_03838 ANIA_03973 ANIA_04215 ANIA_04238 ANIA_04304 ANIA_04483 ANIA_04668 ANIA_05324 ANIA_05440 ANIA_05523 ANIA_05577 ANI…
0.0061698	90	191	1.38433	Storage vacuole	http://amigo.geneontology.org/amigo/term/GO:0000322	ANIA_00089 ANIA_00201 ANIA_00225 ANIA_00275 ANIA_00700 ANIA_00732 ANIA_00763 ANIA_01021 ANIA_01076 ANIA_01211 ANIA_01243 ANIA_01334 ANIA_01426 ANIA_01545 ANIA_01766 ANIA_01795 ANIA_02053 ANIA_02070 ANIA_02093 ANIA_02312 ANIA_02342 ANIA_02358 ANIA_02531 ANIA_02651 ANIA_02675 ANIA_02746 ANIA_02840 ANIA_02903 ANIA_03125 ANIA_03722 ANIA_03793 ANIA_04238 ANIA_04241 ANIA_04328 ANIA_04416 ANIA_04477 ANI…
0.0061698	90	191	1.38433	Fungal-type vacuole	http://amigo.geneontology.org/amigo/term/GO:0000324	ANIA_00089 ANIA_00201 ANIA_00225 ANIA_00275 ANIA_00700 ANIA_00732 ANIA_00763 ANIA_01021 ANIA_01076 ANIA_01211 ANIA_01243 ANIA_01334 ANIA_01426 ANIA_01545 ANIA_01766 ANIA_01795 ANIA_02053 ANIA_02070 ANIA_02093 ANIA_02312 ANIA_02342 ANIA_02358 ANIA_02531 ANIA_02651 ANIA_02675 ANIA_02746 ANIA_02840 ANIA_02903 ANIA_03125 ANIA_03722 ANIA_03793 ANIA_04238 ANIA_04241 ANIA_04328 ANIA_04416 ANIA_04477 ANI…
0.0061698	412	1035	1.15334	Catabolic process	http://amigo.geneontology.org/amigo/term/GO:0009056	ANIA_00078 ANIA_00090 ANIA_00122 ANIA_00226 ANIA_00245 ANIA_00295 ANIA_00299 ANIA_00300 ANIA_00313 ANIA_00329 ANIA_00349 ANIA_00351 ANIA_00401 ANIA_00405 ANIA_00408 ANIA_00436 ANIA_00441 ANIA_00472 ANIA_00494 ANIA_00505 ANIA_00557 ANIA_00563 ANIA_00632 ANIA_00662 ANIA_00689 ANIA_00741 ANIA_00763 ANIA_00802 ANIA_00831 ANIA_00859 ANIA_00868 ANIA_00874 ANIA_00891 ANIA_00911 ANIA_00927 ANIA_01014 ANI…
0.00619547	152	344	1.27901	Cellular response to chemical stimulus	http://amigo.geneontology.org/amigo/term/GO:0070887	ANIA_00158 ANIA_00170 ANIA_00240 ANIA_00241 ANIA_00273 ANIA_00329 ANIA_00408 ANIA_00432 ANIA_00656 ANIA_00670 ANIA_00671 ANIA_00718 ANIA_00797 ANIA_00825 ANIA_00858 ANIA_00863 ANIA_00927 ANIA_00931 ANIA_00932 ANIA_00988 ANIA_01017 ANIA_01050 ANIA_01149 ANIA_01252 ANIA_01396 ANIA_01406 ANIA_01639 ANIA_01795 ANIA_01800 ANIA_01812 ANIA_01853 ANIA_01986 ANIA_02005 ANIA_02011 ANIA_02045 ANIA_02150 ANI…
0.00630963	326	803	1.17613	Organelle membrane	http://amigo.geneontology.org/amigo/term/GO:0031090	ANIA_00066 ANIA_00089 ANIA_00090 ANIA_00110 ANIA_00201 ANIA_00206 ANIA_00225 ANIA_00255 ANIA_00256 ANIA_00257 ANIA_00275 ANIA_00295 ANIA_00329 ANIA_00405 ANIA_00411 ANIA_00432 ANIA_00580 ANIA_00627 ANIA_00650 ANIA_00700 ANIA_00716 ANIA_00732 ANIA_00763 ANIA_00795 ANIA_00819 ANIA_00827 ANIA_00831 ANIA_00861 ANIA_00871 ANIA_00874 ANIA_00918 ANIA_00949 ANIA_01014 ANIA_01022 ANIA_01066 ANIA_01069 ANI…
0.0067855	15	19	2.25865	Proteasome assembly	http://amigo.geneontology.org/amigo/term/GO:0043248	ANIA_00557 ANIA_01245 ANIA_01700 ANIA_02213 ANIA_02904 ANIA_02917 ANIA_03019 ANIA_03716 ANIA_03932 ANIA_04731 ANIA_05747 ANIA_05774 ANIA_07579 ANIA_10519 ANIA_10708
0.00731761	78	160	1.41237	Mitochondrion organization	http://amigo.geneontology.org/amigo/term/GO:0007005	ANIA_00604 ANIA_01066 ANIA_01093 ANIA_01104 ANIA_01149 ANIA_01163 ANIA_01339 ANIA_01760 ANIA_01986 ANIA_02076 ANIA_02103 ANIA_02313 ANIA_02432 ANIA_02526 ANIA_02887 ANIA_02939 ANIA_02991 ANIA_03149 ANIA_03470 ANIA_03758 ANIA_03803 ANIA_03831 ANIA_03928 ANIA_04164 ANIA_04307 ANIA_04557 ANIA_04633 ANIA_04666 ANIA_04740 ANIA_04755 ANIA_04863 ANIA_04883 ANIA_04918 ANIA_05008 ANIA_05327 ANIA_05491 ANI…
0.00805631	274	664	1.19134	Catalytic activity, acting on a protein	http://amigo.geneontology.org/amigo/term/GO:0140096	ANIA_00091 ANIA_00122 ANIA_00144 ANIA_00170 ANIA_00226 ANIA_00256 ANIA_00293 ANIA_00349 ANIA_00369 ANIA_00402 ANIA_00436 ANIA_00441 ANIA_00832 ANIA_00871 ANIA_00927 ANIA_00931 ANIA_00932 ANIA_00988 ANIA_01017 ANIA_01019 ANIA_01075 ANIA_01092 ANIA_01097 ANIA_01104 ANIA_01171 ANIA_01179 ANIA_01320 ANIA_01339 ANIA_01343 ANIA_01375 ANIA_01426 ANIA_01467 ANIA_01504 ANIA_01539 ANIA_01545 ANIA_01573 ANI…
0.00876481	68	139	1.44107	Membrane organization	http://amigo.geneontology.org/amigo/term/GO:0061024	ANIA_00281 ANIA_00411 ANIA_00571 ANIA_00573 ANIA_00627 ANIA_00650 ANIA_00763 ANIA_00802 ANIA_01085 ANIA_01093 ANIA_01171 ANIA_01229 ANIA_01365 ANIA_01973 ANIA_02011 ANIA_02048 ANIA_02169 ANIA_02266 ANIA_02279 ANIA_02302 ANIA_02313 ANIA_02419 ANIA_02516 ANIA_02939 ANIA_02991 ANIA_03144 ANIA_03594 ANIA_03752 ANIA_03842 ANIA_04045 ANIA_04240 ANIA_04295 ANIA_04416 ANIA_04537 ANIA_04557 ANIA_04601 ANI…
0.00876481	68	140	1.44107	Lytic vacuole membrane	http://amigo.geneontology.org/amigo/term/GO:0098852	ANIA_00089 ANIA_00201 ANIA_00225 ANIA_00700 ANIA_00732 ANIA_00763 ANIA_01211 ANIA_01243 ANIA_01334 ANIA_01412 ANIA_01545 ANIA_01766 ANIA_01795 ANIA_02053 ANIA_02070 ANIA_02093 ANIA_02312 ANIA_02358 ANIA_02531 ANIA_02675 ANIA_02746 ANIA_02840 ANIA_03722 ANIA_03934 ANIA_04238 ANIA_04241 ANIA_04328 ANIA_04416 ANIA_04477 ANIA_04995 ANIA_05083 ANIA_05131 ANIA_05211 ANIA_05606 ANIA_05632 ANIA_05876 ANI…
0.010529	13	16	2.32452	Proteasomal ubiquitin-independent protein catabolic process	http://amigo.geneontology.org/amigo/term/GO:0010499	ANIA_02085 ANIA_03493 ANIA_03756 ANIA_03932 ANIA_04449 ANIA_04457 ANIA_05607 ANIA_05784 ANIA_05793 ANIA_06547 ANIA_06726 ANIA_08054 ANIA_10708
0.010529	13	16	2.32452	Mitochondrion disassembly	http://amigo.geneontology.org/amigo/term/GO:0061726	ANIA_01760 ANIA_02076 ANIA_02887 ANIA_03470 ANIA_04666 ANIA_05491 ANIA_06225 ANIA_06360 ANIA_07428 ANIA_07724 ANIA_07771 ANIA_09461 ANIA_11004
0.010529	20	29	1.97307	Peroxisomal membrane	http://amigo.geneontology.org/amigo/term/GO:0005778	ANIA_00257 ANIA_01014 ANIA_01483 ANIA_01511 ANIA_01593 ANIA_01921 ANIA_04280 ANIA_04318 ANIA_04579 ANIA_04899 ANIA_04995 ANIA_05113 ANIA_05681 ANIA_05692 ANIA_06225 ANIA_06258 ANIA_07256 ANIA_10215 ANIA_10303 ANIA_10925
0.010529	13	16	2.32452	Proteasome core complex	http://amigo.geneontology.org/amigo/term/GO:0005839	ANIA_02085 ANIA_03493 ANIA_03756 ANIA_03932 ANIA_04449 ANIA_04457 ANIA_05607 ANIA_05784 ANIA_05793 ANIA_06547 ANIA_06726 ANIA_08054 ANIA_10708
0.010529	20	29	1.97307	Microbody membrane	http://amigo.geneontology.org/amigo/term/GO:0031903	ANIA_00257 ANIA_01014 ANIA_01483 ANIA_01511 ANIA_01593 ANIA_01921 ANIA_04280 ANIA_04318 ANIA_04579 ANIA_04899 ANIA_04995 ANIA_05113 ANIA_05681 ANIA_05692 ANIA_06225 ANIA_06258 ANIA_07256 ANIA_10215 ANIA_10303 ANIA_10925
0.010529	139	314	1.27869	Cellular amino acid metabolic process	http://amigo.geneontology.org/amigo/term/GO:0006520	ANIA_00057 ANIA_00200 ANIA_00202 ANIA_00300 ANIA_00314 ANIA_00354 ANIA_00385 ANIA_00401 ANIA_00648 ANIA_00705 ANIA_00708 ANIA_00717 ANIA_00797 ANIA_00840 ANIA_00859 ANIA_00912 ANIA_01092 ANIA_01137 ANIA_01150 ANIA_01198 ANIA_01380 ANIA_01446 ANIA_01541 ANIA_01731 ANIA_01745 ANIA_01810 ANIA_01883 ANIA_01897 ANIA_01899 ANIA_01990 ANIA_01993 ANIA_02042 ANIA_02150 ANIA_02229 ANIA_02243 ANIA_02410 ANI…
0.010529	13	16	2.32452	Autophagy of mitochondrion	http://amigo.geneontology.org/amigo/term/GO:0000422	ANIA_01760 ANIA_02076 ANIA_02887 ANIA_03470 ANIA_04666 ANIA_05491 ANIA_06225 ANIA_06360 ANIA_07428 ANIA_07724 ANIA_07771 ANIA_09461 ANIA_11004
0.0105977	10	11	2.60087	Lysosomal microautophagy	http://amigo.geneontology.org/amigo/term/GO:0016237	ANIA_01334 ANIA_01545 ANIA_02076 ANIA_03424 ANIA_03807 ANIA_05491 ANIA_05919 ANIA_06360 ANIA_07428 ANIA_12408
0.0110113	53	102	1.50129	Response to abiotic stimulus	http://amigo.geneontology.org/amigo/term/GO:0009628	ANIA_00256 ANIA_00363 ANIA_00387 ANIA_00604 ANIA_00656 ANIA_00658 ANIA_00766 ANIA_00858 ANIA_00931 ANIA_01017 ANIA_01163 ANIA_01237 ANIA_01339 ANIA_01800 ANIA_01844 ANIA_02005 ANIA_02238 ANIA_02284 ANIA_02530 ANIA_02731 ANIA_02882 ANIA_02911 ANIA_02919 ANIA_03441 ANIA_03688 ANIA_03784 ANIA_04029 ANIA_04238 ANIA_04304 ANIA_04331 ANIA_04552 ANIA_04668 ANIA_05129 ANIA_05324 ANIA_05523 ANIA_05563 ANI…
0.0113189	8	8	2.86095	Nuclear proteasome complex	http://amigo.geneontology.org/amigo/term/GO:0031595	ANIA_00927 ANIA_02213 ANIA_02904 ANIA_02917 ANIA_04236 ANIA_04775 ANIA_05747 ANIA_06988
0.0119416	31	55	1.70557	Membrane fusion	http://amigo.geneontology.org/amigo/term/GO:0061025	ANIA_00281 ANIA_00571 ANIA_00573 ANIA_00627 ANIA_00650 ANIA_00763 ANIA_01085 ANIA_01093 ANIA_01229 ANIA_01973 ANIA_02048 ANIA_02169 ANIA_02266 ANIA_02419 ANIA_03144 ANIA_03752 ANIA_03842 ANIA_04416 ANIA_04537 ANIA_04876 ANIA_05327 ANIA_06267 ANIA_06618 ANIA_06890 ANIA_07444 ANIA_08769 ANIA_09526 ANIA_10190 ANIA_10849 ANIA_11010 ANIA_11055
0.0119416	58	114	1.46845	Enzyme binding	http://amigo.geneontology.org/amigo/term/GO:0019899	ANIA_00056 ANIA_00226 ANIA_00239 ANIA_00295 ANIA_01019 ANIA_01089 ANIA_01096 ANIA_01191 ANIA_01362 ANIA_01761 ANIA_02000 ANIA_02005 ANIA_02051 ANIA_02076 ANIA_02212 ANIA_02312 ANIA_02413 ANIA_02514 ANIA_02761 ANIA_02917 ANIA_03644 ANIA_03689 ANIA_03755 ANIA_04570 ANIA_04782 ANIA_04861 ANIA_04876 ANIA_04928 ANIA_04984 ANIA_04988 ANIA_05083 ANIA_05156 ANIA_05344 ANIA_05606 ANIA_05631 ANIA_05747 ANI…
0.0125761	14	18	2.22518	Positive regulation of proteolysis	http://amigo.geneontology.org/amigo/term/GO:0045862	ANIA_01167 ANIA_01339 ANIA_02213 ANIA_02904 ANIA_02917 ANIA_03689 ANIA_04449 ANIA_04457 ANIA_05607 ANIA_05906 ANIA_05961 ANIA_06609 ANIA_09320 ANIA_10017
0.0130797	154	354	1.25523	Cellular macromolecule catabolic process	http://amigo.geneontology.org/amigo/term/GO:0044265	ANIA_00078 ANIA_00122 ANIA_00226 ANIA_00295 ANIA_00329 ANIA_00436 ANIA_00441 ANIA_00505 ANIA_00557 ANIA_00632 ANIA_00831 ANIA_00874 ANIA_00911 ANIA_00927 ANIA_01019 ANIA_01075 ANIA_01167 ANIA_01179 ANIA_01197 ANIA_01245 ANIA_01339 ANIA_01362 ANIA_01426 ANIA_01461 ANIA_01700 ANIA_01761 ANIA_01772 ANIA_01818 ANIA_01900 ANIA_01922 ANIA_01995 ANIA_02000 ANIA_02045 ANIA_02066 ANIA_02071 ANIA_02085 ANI…
0.0135095	47	90	1.52801	Biosynthesis of amino acids	http://www.genome.jp/kegg-bin/show_pathway?ani01230	ANIA_00385 ANIA_00717 ANIA_00797 ANIA_00912 ANIA_01990 ANIA_01993 ANIA_02229 ANIA_02525 ANIA_02526 ANIA_02583 ANIA_02728 ANIA_02793 ANIA_02875 ANIA_02882 ANIA_02901 ANIA_03031 ANIA_04159 ANIA_04355 ANIA_04401 ANIA_04430 ANIA_04462 ANIA_04793 ANIA_05206 ANIA_05300 ANIA_05444 ANIA_05525 ANIA_05601 ANIA_05610 ANIA_05701 ANIA_05731 ANIA_05799 ANIA_05867 ANIA_05886 ANIA_05908 ANIA_05957 ANIA_06025 ANI…
0.014639	27	44	1.75558	Mitochondrial respiratory chain complex assembly	http://amigo.geneontology.org/amigo/term/GO:0033108	ANIA_01066 ANIA_01149 ANIA_02103 ANIA_03149 ANIA_04164 ANIA_04307 ANIA_04740 ANIA_04863 ANIA_04918 ANIA_05008 ANIA_05813 ANIA_05938 ANIA_06034 ANIA_06397 ANIA_06593 ANIA_06841 ANIA_07549 ANIA_07629 ANIA_08766 ANIA_10178 ANIA_10569 ANIA_10609 ANIA_10622 ANIA_10711 ANIA_10717 ANIA_10871 ANIA_11251
0.0171169	65	135	1.41956	Fungal-type vacuole membrane	http://amigo.geneontology.org/amigo/term/GO:0000329	ANIA_00089 ANIA_00201 ANIA_00225 ANIA_00700 ANIA_00732 ANIA_00763 ANIA_01211 ANIA_01243 ANIA_01334 ANIA_01545 ANIA_01766 ANIA_01795 ANIA_02053 ANIA_02070 ANIA_02093 ANIA_02312 ANIA_02358 ANIA_02531 ANIA_02675 ANIA_02746 ANIA_02840 ANIA_03722 ANIA_04238 ANIA_04241 ANIA_04328 ANIA_04416 ANIA_04477 ANIA_05083 ANIA_05131 ANIA_05211 ANIA_05606 ANIA_05632 ANIA_05876 ANIA_05880 ANIA_06429 ANIA_06451 ANI…
0.0177891	31	53	1.67339	Detoxification	http://amigo.geneontology.org/amigo/term/GO:0098754	ANIA_00225 ANIA_00241 ANIA_00408 ANIA_00932 ANIA_01252 ANIA_01795 ANIA_02592 ANIA_02594 ANIA_02846 ANIA_02948 ANIA_03298 ANIA_03581 ANIA_03687 ANIA_03849 ANIA_03973 ANIA_04215 ANIA_05232 ANIA_05440 ANIA_05577 ANIA_05893 ANIA_05918 ANIA_06024 ANIA_06045 ANIA_06158 ANIA_06936 ANIA_07823 ANIA_07924 ANIA_08637 ANIA_09339 ANIA_10220 ANIA_11015
0.0178654	19	28	1.94136	Regulation of proteolysis	http://amigo.geneontology.org/amigo/term/GO:0030162	ANIA_01167 ANIA_01339 ANIA_02180 ANIA_02213 ANIA_02904 ANIA_02917 ANIA_03689 ANIA_04449 ANIA_04457 ANIA_05125 ANIA_05607 ANIA_05906 ANIA_05961 ANIA_06179 ANIA_06337 ANIA_06609 ANIA_07973 ANIA_09320 ANIA_10017
0.0178654	40	74	1.56764	Cellular modified amino acid metabolic process	http://amigo.geneontology.org/amigo/term/GO:0006575	ANIA_00205 ANIA_00401 ANIA_00629 ANIA_00932 ANIA_01059 ANIA_01092 ANIA_01100 ANIA_01778 ANIA_01826 ANIA_01883 ANIA_02389 ANIA_02514 ANIA_02592 ANIA_02846 ANIA_02948 ANIA_02988 ANIA_03150 ANIA_03298 ANIA_03299 ANIA_03849 ANIA_03972 ANIA_04174 ANIA_04384 ANIA_04462 ANIA_04905 ANIA_05166 ANIA_05652 ANIA_06024 ANIA_06032 ANIA_06108 ANIA_06550 ANIA_06936 ANIA_07365 ANIA_07729 ANIA_08188 ANIA_08215 ANI…
0.0220484	175	410	1.22412	Small molecule biosynthetic process	http://amigo.geneontology.org/amigo/term/GO:0044283	ANIA_00082 ANIA_00156 ANIA_00205 ANIA_00256 ANIA_00354 ANIA_00385 ANIA_00432 ANIA_00648 ANIA_00662 ANIA_00670 ANIA_00708 ANIA_00717 ANIA_00797 ANIA_00840 ANIA_00912 ANIA_00918 ANIA_00949 ANIA_01032 ANIA_01033 ANIA_01102 ANIA_01137 ANIA_01150 ANIA_01176 ANIA_01339 ANIA_01404 ANIA_01446 ANIA_01593 ANIA_01614 ANIA_01778 ANIA_01810 ANIA_01844 ANIA_01854 ANIA_01860 ANIA_01883 ANIA_01897 ANIA_01899 ANI…
0.0246082	26	43	1.72988	Extrinsic component of membrane	http://amigo.geneontology.org/amigo/term/GO:0019898	ANIA_01016 ANIA_01093 ANIA_01335 ANIA_01339 ANIA_01999 ANIA_02070 ANIA_02076 ANIA_02224 ANIA_03584 ANIA_03586 ANIA_03594 ANIA_04569 ANIA_04579 ANIA_04666 ANIA_04709 ANIA_05491 ANIA_05579 ANIA_05816 ANIA_06267 ANIA_06351 ANIA_06572 ANIA_08868 ANIA_10213 ANIA_10594 ANIA_10682 ANIA_10918
0.0257153	25	42	1.74448	Ubiquitin-like protein ligase binding	http://amigo.geneontology.org/amigo/term/GO:0044389	ANIA_00056 ANIA_00226 ANIA_00295 ANIA_01019 ANIA_01089 ANIA_01191 ANIA_01761 ANIA_02000 ANIA_02212 ANIA_02312 ANIA_02413 ANIA_02761 ANIA_02917 ANIA_03644 ANIA_05344 ANIA_05747 ANIA_06179 ANIA_07577 ANIA_07973 ANIA_08258 ANIA_08702 ANIA_10008 ANIA_10268 ANIA_10365 ANIA_10994
0.0257153	25	42	1.74448	Glutathione metabolic process	http://amigo.geneontology.org/amigo/term/GO:0006749	ANIA_00401 ANIA_00629 ANIA_00932 ANIA_01092 ANIA_01100 ANIA_01826 ANIA_02514 ANIA_02592 ANIA_02846 ANIA_02948 ANIA_02988 ANIA_03150 ANIA_03298 ANIA_03299 ANIA_03849 ANIA_03972 ANIA_04174 ANIA_04462 ANIA_04905 ANIA_05652 ANIA_06024 ANIA_06936 ANIA_07365 ANIA_07729 ANIA_09304
0.0259776	31	54	1.6424	Response to toxic substance	http://amigo.geneontology.org/amigo/term/GO:0009636	ANIA_00225 ANIA_00241 ANIA_00408 ANIA_00932 ANIA_01252 ANIA_01795 ANIA_02592 ANIA_02594 ANIA_02846 ANIA_02948 ANIA_03298 ANIA_03581 ANIA_03687 ANIA_03849 ANIA_03973 ANIA_04215 ANIA_05232 ANIA_05440 ANIA_05577 ANIA_05893 ANIA_05918 ANIA_06024 ANIA_06045 ANIA_06158 ANIA_06936 ANIA_07823 ANIA_07924 ANIA_08637 ANIA_09339 ANIA_10220 ANIA_11015
0.0322955	17	25	1.94545	Regulation of vesicle-mediated transport	http://amigo.geneontology.org/amigo/term/GO:0060627	ANIA_00281 ANIA_00411 ANIA_00573 ANIA_01339 ANIA_02756 ANIA_03752 ANIA_04537 ANIA_04782 ANIA_04884 ANIA_06618 ANIA_06890 ANIA_06974 ANIA_07444 ANIA_08233 ANIA_09072 ANIA_10190 ANIA_11010
0.0322955	18	27	1.9073	Organelle disassembly	http://amigo.geneontology.org/amigo/term/GO:1903008	ANIA_01083 ANIA_01760 ANIA_02076 ANIA_02107 ANIA_02887 ANIA_03470 ANIA_04666 ANIA_04915 ANIA_05491 ANIA_06225 ANIA_06360 ANIA_07254 ANIA_07428 ANIA_07724 ANIA_07771 ANIA_08959 ANIA_09461 ANIA_11004
0.0322955	19	29	1.87442	Oxidoreductase activity, acting on a sulfur group of donors	http://amigo.geneontology.org/amigo/term/GO:0016667	ANIA_00170 ANIA_00932 ANIA_01639 ANIA_01825 ANIA_01932 ANIA_03027 ANIA_03298 ANIA_03581 ANIA_03759 ANIA_03849 ANIA_04215 ANIA_04304 ANIA_04770 ANIA_06936 ANIA_07567 ANIA_08058 ANIA_08346 ANIA_10562 ANIA_10641
0.0322955	18	29	1.9073	2-Oxocarboxylic acid metabolism	http://www.genome.jp/kegg-bin/show_pathway?ani01210	ANIA_00912 ANIA_01990 ANIA_01993 ANIA_02526 ANIA_02793 ANIA_04430 ANIA_04793 ANIA_05206 ANIA_05300 ANIA_05525 ANIA_05867 ANIA_05886 ANIA_05957 ANIA_06338 ANIA_06346 ANIA_07876 ANIA_08511 ANIA_08709
0.0345522	10	13	2.38413	SNAP receptor activity	http://amigo.geneontology.org/amigo/term/GO:0005484	ANIA_00571 ANIA_00650 ANIA_01229 ANIA_01973 ANIA_02048 ANIA_02169 ANIA_02419 ANIA_04416 ANIA_08769 ANIA_09526
0.0369323	26	44	1.69056	Antioxidant activity	http://amigo.geneontology.org/amigo/term/GO:0016209	ANIA_00170 ANIA_00241 ANIA_00932 ANIA_01252 ANIA_01639 ANIA_02594 ANIA_02846 ANIA_03298 ANIA_03581 ANIA_03687 ANIA_03849 ANIA_03973 ANIA_04215 ANIA_05232 ANIA_05440 ANIA_05577 ANIA_05918 ANIA_06024 ANIA_06045 ANIA_06158 ANIA_06936 ANIA_07823 ANIA_07924 ANIA_08637 ANIA_09339 ANIA_10220
0.0424197	24	41	1.71657	Ubiquitin protein ligase binding	http://amigo.geneontology.org/amigo/term/GO:0031625	ANIA_00056 ANIA_00226 ANIA_00295 ANIA_01019 ANIA_01089 ANIA_01761 ANIA_02000 ANIA_02212 ANIA_02312 ANIA_02413 ANIA_02761 ANIA_02917 ANIA_03644 ANIA_05344 ANIA_05747 ANIA_06179 ANIA_07577 ANIA_07973 ANIA_08258 ANIA_08702 ANIA_10008 ANIA_10268 ANIA_10365 ANIA_10994
0.0430019	115	265	1.26542	Vesicle-mediated transport	http://amigo.geneontology.org/amigo/term/GO:0016192	ANIA_00056 ANIA_00165 ANIA_00255 ANIA_00281 ANIA_00411 ANIA_00571 ANIA_00573 ANIA_00627 ANIA_00650 ANIA_00763 ANIA_00819 ANIA_00831 ANIA_01002 ANIA_01089 ANIA_01229 ANIA_01245 ANIA_01297 ANIA_01339 ANIA_01341 ANIA_01365 ANIA_01558 ANIA_01796 ANIA_01973 ANIA_02011 ANIA_02048 ANIA_02066 ANIA_02071 ANIA_02093 ANIA_02169 ANIA_02224 ANIA_02266 ANIA_02277 ANIA_02279 ANIA_02312 ANIA_02419 ANIA_02516 ANI…
0.0430019	11	14	2.24789	Double-strand break repair via nonhomologous end joining	http://amigo.geneontology.org/amigo/term/GO:0006303	ANIA_00097 ANIA_00437 ANIA_00556 ANIA_01231 ANIA_03619 ANIA_04519 ANIA_04552 ANIA_04883 ANIA_06114 ANIA_07753 ANIA_10962
0.0430019	11	15	2.24789	SNARE complex	http://amigo.geneontology.org/amigo/term/GO:0031201	ANIA_00571 ANIA_00650 ANIA_01229 ANIA_01973 ANIA_02048 ANIA_02169 ANIA_02419 ANIA_04416 ANIA_06267 ANIA_08769 ANIA_09526
Species	Type of genes	Criteria	Number of genes
A. nidulans	downregulated	DEG; log2FC<-1	2220
Enrichment FDR	nGenes	Pathway Genes	Fold Enrichment	Pathway	URL	Genes
3.93529e-91	206	255	3.81518	Ribosome biogenesis	http://amigo.geneontology.org/amigo/term/GO:0042254	ANIA_00074 ANIA_00092 ANIA_00124 ANIA_00189 ANIA_00204 ANIA_00237 ANIA_00247 ANIA_00262 ANIA_00305 ANIA_00327 ANIA_00421 ANIA_00448 ANIA_00465 ANIA_00475 ANIA_00570 ANIA_00583 ANIA_00589 ANIA_00625 ANIA_00637 ANIA_00647 ANIA_00659 ANIA_00695 ANIA_00707 ANIA_00728 ANIA_00745 ANIA_00796 ANIA_00843 ANIA_00844 ANIA_00944 ANIA_00946 ANIA_01013 ANIA_01122 ANIA_01164 ANIA_01166 ANIA_01175 ANIA_01200 ANI…
3.13723e-87	234	322	3.432	Ribonucleoprotein complex biogenesis	http://amigo.geneontology.org/amigo/term/GO:0022613	ANIA_00074 ANIA_00092 ANIA_00124 ANIA_00189 ANIA_00204 ANIA_00237 ANIA_00247 ANIA_00262 ANIA_00305 ANIA_00327 ANIA_00359 ANIA_00421 ANIA_00448 ANIA_00465 ANIA_00475 ANIA_00570 ANIA_00583 ANIA_00589 ANIA_00625 ANIA_00637 ANIA_00647 ANIA_00659 ANIA_00695 ANIA_00707 ANIA_00728 ANIA_00745 ANIA_00796 ANIA_00843 ANIA_00844 ANIA_00944 ANIA_00946 ANIA_01013 ANIA_01122 ANIA_01164 ANIA_01166 ANIA_01175 ANI…
1.28924e-77	417	849	2.31961	Non-membrane-bounded organelle	http://amigo.geneontology.org/amigo/term/GO:0043228	ANIA_00044 ANIA_00074 ANIA_00092 ANIA_00118 ANIA_00123 ANIA_00126 ANIA_00142 ANIA_00189 ANIA_00192 ANIA_00204 ANIA_00237 ANIA_00247 ANIA_00260 ANIA_00262 ANIA_00276 ANIA_00278 ANIA_00305 ANIA_00316 ANIA_00327 ANIA_00359 ANIA_00406 ANIA_00420 ANIA_00421 ANIA_00433 ANIA_00445 ANIA_00461 ANIA_00465 ANIA_00475 ANIA_00570 ANIA_00583 ANIA_00589 ANIA_00625 ANIA_00637 ANIA_00647 ANIA_00659 ANIA_00676 ANI…
1.28924e-77	417	849	2.31961	Intracellular non-membrane-bounded organelle	http://amigo.geneontology.org/amigo/term/GO:0043232	ANIA_00044 ANIA_00074 ANIA_00092 ANIA_00118 ANIA_00123 ANIA_00126 ANIA_00142 ANIA_00189 ANIA_00192 ANIA_00204 ANIA_00237 ANIA_00247 ANIA_00260 ANIA_00262 ANIA_00276 ANIA_00278 ANIA_00305 ANIA_00316 ANIA_00327 ANIA_00359 ANIA_00406 ANIA_00420 ANIA_00421 ANIA_00433 ANIA_00445 ANIA_00461 ANIA_00465 ANIA_00475 ANIA_00570 ANIA_00583 ANIA_00589 ANIA_00625 ANIA_00637 ANIA_00647 ANIA_00659 ANIA_00676 ANI…
2.49017e-71	154	185	3.9313	RRNA processing	http://amigo.geneontology.org/amigo/term/GO:0006364	ANIA_00074 ANIA_00092 ANIA_00124 ANIA_00189 ANIA_00204 ANIA_00237 ANIA_00247 ANIA_00305 ANIA_00327 ANIA_00421 ANIA_00448 ANIA_00465 ANIA_00475 ANIA_00583 ANIA_00589 ANIA_00625 ANIA_00637 ANIA_00647 ANIA_00695 ANIA_00707 ANIA_00745 ANIA_00796 ANIA_00944 ANIA_01122 ANIA_01164 ANIA_01175 ANIA_01228 ANIA_01319 ANIA_01354 ANIA_01367 ANIA_01434 ANIA_01452 ANIA_01474 ANIA_01533 ANIA_01750 ANIA_01949 ANI…
1.74687e-70	201	286	3.31908	NcRNA processing	http://amigo.geneontology.org/amigo/term/GO:0034470	ANIA_00062 ANIA_00072 ANIA_00074 ANIA_00092 ANIA_00114 ANIA_00124 ANIA_00130 ANIA_00141 ANIA_00189 ANIA_00190 ANIA_00204 ANIA_00237 ANIA_00247 ANIA_00305 ANIA_00327 ANIA_00421 ANIA_00448 ANIA_00465 ANIA_00475 ANIA_00502 ANIA_00583 ANIA_00589 ANIA_00625 ANIA_00637 ANIA_00647 ANIA_00695 ANIA_00707 ANIA_00745 ANIA_00757 ANIA_00796 ANIA_00804 ANIA_00818 ANIA_00944 ANIA_00956 ANIA_00997 ANIA_01122 ANI…
1.66685e-69	154	188	3.86857	RRNA metabolic process	http://amigo.geneontology.org/amigo/term/GO:0016072	ANIA_00074 ANIA_00092 ANIA_00124 ANIA_00189 ANIA_00204 ANIA_00237 ANIA_00247 ANIA_00305 ANIA_00327 ANIA_00421 ANIA_00448 ANIA_00465 ANIA_00475 ANIA_00583 ANIA_00589 ANIA_00625 ANIA_00637 ANIA_00647 ANIA_00695 ANIA_00707 ANIA_00745 ANIA_00796 ANIA_00944 ANIA_01122 ANIA_01164 ANIA_01175 ANIA_01228 ANIA_01319 ANIA_01354 ANIA_01367 ANIA_01434 ANIA_01452 ANIA_01474 ANIA_01533 ANIA_01750 ANIA_01949 ANI…
1.37943e-64	243	406	2.82662	Ribonucleoprotein complex	http://amigo.geneontology.org/amigo/term/GO:1990904	ANIA_00074 ANIA_00092 ANIA_00123 ANIA_00124 ANIA_00133 ANIA_00142 ANIA_00189 ANIA_00211 ANIA_00242 ANIA_00247 ANIA_00262 ANIA_00278 ANIA_00282 ANIA_00305 ANIA_00359 ANIA_00421 ANIA_00433 ANIA_00445 ANIA_00448 ANIA_00465 ANIA_00475 ANIA_00570 ANIA_00647 ANIA_00695 ANIA_00728 ANIA_00745 ANIA_00753 ANIA_00776 ANIA_00796 ANIA_00843 ANIA_00907 ANIA_00946 ANIA_01013 ANIA_01045 ANIA_01095 ANIA_01122 ANI…
3.6415e-61	209	330	2.99102	NcRNA metabolic process	http://amigo.geneontology.org/amigo/term/GO:0034660	ANIA_00062 ANIA_00072 ANIA_00074 ANIA_00092 ANIA_00114 ANIA_00124 ANIA_00130 ANIA_00141 ANIA_00189 ANIA_00190 ANIA_00204 ANIA_00237 ANIA_00247 ANIA_00305 ANIA_00327 ANIA_00421 ANIA_00448 ANIA_00465 ANIA_00475 ANIA_00502 ANIA_00583 ANIA_00589 ANIA_00625 ANIA_00637 ANIA_00647 ANIA_00695 ANIA_00707 ANIA_00745 ANIA_00757 ANIA_00796 ANIA_00804 ANIA_00818 ANIA_00944 ANIA_00956 ANIA_00997 ANIA_01122 ANI…
5.1672e-60	154	205	3.54776	Nucleolus	http://amigo.geneontology.org/amigo/term/GO:0005730	ANIA_00074 ANIA_00092 ANIA_00189 ANIA_00192 ANIA_00204 ANIA_00237 ANIA_00247 ANIA_00305 ANIA_00421 ANIA_00461 ANIA_00475 ANIA_00583 ANIA_00589 ANIA_00625 ANIA_00637 ANIA_00647 ANIA_00659 ANIA_00695 ANIA_00752 ANIA_00796 ANIA_00844 ANIA_00894 ANIA_00944 ANIA_00946 ANIA_01164 ANIA_01215 ANIA_01272 ANIA_01319 ANIA_01354 ANIA_01367 ANIA_01434 ANIA_01452 ANIA_01474 ANIA_01533 ANIA_01666 ANIA_01750 ANI…
1.42324e-50	143	201	3.35991	Structural molecule activity	http://amigo.geneontology.org/amigo/term/GO:0005198	ANIA_00123 ANIA_00142 ANIA_00262 ANIA_00278 ANIA_00316 ANIA_00433 ANIA_00445 ANIA_00465 ANIA_00570 ANIA_00676 ANIA_00776 ANIA_00843 ANIA_00907 ANIA_01013 ANIA_01064 ANIA_01095 ANIA_01122 ANIA_01166 ANIA_01177 ANIA_01182 ANIA_01190 ANIA_01228 ANIA_01238 ANIA_01345 ANIA_01770 ANIA_01954 ANIA_01964 ANIA_02057 ANIA_02086 ANIA_02268 ANIA_02275 ANIA_02301 ANIA_02431 ANIA_02734 ANIA_02949 ANIA_02980 ANI…
4.36534e-48	110	136	3.81981	Structural constituent of ribosome	http://amigo.geneontology.org/amigo/term/GO:0003735	ANIA_00123 ANIA_00142 ANIA_00262 ANIA_00278 ANIA_00433 ANIA_00445 ANIA_00465 ANIA_00570 ANIA_00776 ANIA_00843 ANIA_00907 ANIA_01013 ANIA_01095 ANIA_01122 ANIA_01166 ANIA_01228 ANIA_01345 ANIA_01770 ANIA_01954 ANIA_01964 ANIA_02057 ANIA_02268 ANIA_02275 ANIA_02301 ANIA_02734 ANIA_02949 ANIA_02980 ANIA_03172 ANIA_03173 ANIA_03413 ANIA_03635 ANIA_03649 ANIA_03706 ANIA_03744 ANIA_03823 ANIA_04060 ANI…
6.94901e-48	255	507	2.37531	RNA binding	http://amigo.geneontology.org/amigo/term/GO:0003723	ANIA_00062 ANIA_00072 ANIA_00105 ANIA_00123 ANIA_00133 ANIA_00142 ANIA_00189 ANIA_00204 ANIA_00211 ANIA_00228 ANIA_00242 ANIA_00247 ANIA_00262 ANIA_00282 ANIA_00292 ANIA_00305 ANIA_00312 ANIA_00359 ANIA_00406 ANIA_00421 ANIA_00433 ANIA_00445 ANIA_00570 ANIA_00583 ANIA_00589 ANIA_00625 ANIA_00647 ANIA_00695 ANIA_00707 ANIA_00728 ANIA_00745 ANIA_00753 ANIA_00757 ANIA_00794 ANIA_00834 ANIA_00843 ANI…
7.50364e-46	121	163	3.50579	Ribosome	http://amigo.geneontology.org/amigo/term/GO:0005840	ANIA_00123 ANIA_00142 ANIA_00262 ANIA_00278 ANIA_00433 ANIA_00445 ANIA_00465 ANIA_00570 ANIA_00776 ANIA_00843 ANIA_00907 ANIA_00997 ANIA_01013 ANIA_01095 ANIA_01122 ANIA_01166 ANIA_01228 ANIA_01256 ANIA_01270 ANIA_01345 ANIA_01770 ANIA_01954 ANIA_01964 ANIA_02057 ANIA_02268 ANIA_02275 ANIA_02301 ANIA_02734 ANIA_02775 ANIA_02949 ANIA_02980 ANIA_03096 ANIA_03172 ANIA_03173 ANIA_03413 ANIA_03635 ANI…
7.50364e-46	111	142	3.69166	Ribosomal subunit	http://amigo.geneontology.org/amigo/term/GO:0044391	ANIA_00123 ANIA_00142 ANIA_00262 ANIA_00278 ANIA_00433 ANIA_00445 ANIA_00465 ANIA_00570 ANIA_00776 ANIA_00843 ANIA_00907 ANIA_01013 ANIA_01095 ANIA_01122 ANIA_01166 ANIA_01228 ANIA_01345 ANIA_01770 ANIA_01954 ANIA_01964 ANIA_02057 ANIA_02268 ANIA_02275 ANIA_02301 ANIA_02734 ANIA_02775 ANIA_02949 ANIA_02980 ANIA_03096 ANIA_03172 ANIA_03173 ANIA_03413 ANIA_03635 ANIA_03649 ANIA_03706 ANIA_03744 ANI…
8.92093e-46	230	444	2.44643	RNA processing	http://amigo.geneontology.org/amigo/term/GO:0006396	ANIA_00062 ANIA_00072 ANIA_00074 ANIA_00092 ANIA_00114 ANIA_00124 ANIA_00130 ANIA_00133 ANIA_00141 ANIA_00189 ANIA_00190 ANIA_00204 ANIA_00211 ANIA_00237 ANIA_00247 ANIA_00305 ANIA_00327 ANIA_00421 ANIA_00448 ANIA_00465 ANIA_00475 ANIA_00502 ANIA_00583 ANIA_00589 ANIA_00625 ANIA_00637 ANIA_00647 ANIA_00695 ANIA_00707 ANIA_00745 ANIA_00757 ANIA_00796 ANIA_00804 ANIA_00818 ANIA_00944 ANIA_00956 ANI…
2.1032e-45	284	609	2.20236	Membrane-enclosed lumen	http://amigo.geneontology.org/amigo/term/GO:0031974	ANIA_00074 ANIA_00092 ANIA_00123 ANIA_00126 ANIA_00142 ANIA_00189 ANIA_00192 ANIA_00204 ANIA_00237 ANIA_00247 ANIA_00259 ANIA_00260 ANIA_00292 ANIA_00305 ANIA_00327 ANIA_00421 ANIA_00461 ANIA_00475 ANIA_00551 ANIA_00583 ANIA_00589 ANIA_00625 ANIA_00637 ANIA_00647 ANIA_00659 ANIA_00695 ANIA_00745 ANIA_00747 ANIA_00752 ANIA_00787 ANIA_00794 ANIA_00796 ANIA_00808 ANIA_00814 ANIA_00844 ANIA_00872 ANI…
2.1032e-45	284	609	2.20236	Organelle lumen	http://amigo.geneontology.org/amigo/term/GO:0043233	ANIA_00074 ANIA_00092 ANIA_00123 ANIA_00126 ANIA_00142 ANIA_00189 ANIA_00192 ANIA_00204 ANIA_00237 ANIA_00247 ANIA_00259 ANIA_00260 ANIA_00292 ANIA_00305 ANIA_00327 ANIA_00421 ANIA_00461 ANIA_00475 ANIA_00551 ANIA_00583 ANIA_00589 ANIA_00625 ANIA_00637 ANIA_00647 ANIA_00659 ANIA_00695 ANIA_00745 ANIA_00747 ANIA_00752 ANIA_00787 ANIA_00794 ANIA_00796 ANIA_00808 ANIA_00814 ANIA_00844 ANIA_00872 ANI…
2.1032e-45	284	609	2.20236	Intracellular organelle lumen	http://amigo.geneontology.org/amigo/term/GO:0070013	ANIA_00074 ANIA_00092 ANIA_00123 ANIA_00126 ANIA_00142 ANIA_00189 ANIA_00192 ANIA_00204 ANIA_00237 ANIA_00247 ANIA_00259 ANIA_00260 ANIA_00292 ANIA_00305 ANIA_00327 ANIA_00421 ANIA_00461 ANIA_00475 ANIA_00551 ANIA_00583 ANIA_00589 ANIA_00625 ANIA_00637 ANIA_00647 ANIA_00659 ANIA_00695 ANIA_00745 ANIA_00747 ANIA_00752 ANIA_00787 ANIA_00794 ANIA_00796 ANIA_00808 ANIA_00814 ANIA_00844 ANIA_00872 ANI…
2.73109e-44	222	428	2.44961	Nuclear lumen	http://amigo.geneontology.org/amigo/term/GO:0031981	ANIA_00074 ANIA_00092 ANIA_00126 ANIA_00189 ANIA_00192 ANIA_00204 ANIA_00237 ANIA_00247 ANIA_00260 ANIA_00292 ANIA_00305 ANIA_00327 ANIA_00421 ANIA_00461 ANIA_00475 ANIA_00583 ANIA_00589 ANIA_00625 ANIA_00637 ANIA_00647 ANIA_00659 ANIA_00695 ANIA_00745 ANIA_00752 ANIA_00794 ANIA_00796 ANIA_00808 ANIA_00814 ANIA_00844 ANIA_00872 ANIA_00894 ANIA_00905 ANIA_00906 ANIA_00926 ANIA_00944 ANIA_00946 ANI…
5.98189e-41	557	1607	1.63692	Protein-containing complex	http://amigo.geneontology.org/amigo/term/GO:0032991	ANIA_00067 ANIA_00074 ANIA_00092 ANIA_00118 ANIA_00123 ANIA_00124 ANIA_00126 ANIA_00133 ANIA_00142 ANIA_00189 ANIA_00190 ANIA_00192 ANIA_00211 ANIA_00228 ANIA_00242 ANIA_00247 ANIA_00260 ANIA_00261 ANIA_00262 ANIA_00276 ANIA_00278 ANIA_00282 ANIA_00292 ANIA_00305 ANIA_00316 ANIA_00321 ANIA_00327 ANIA_00357 ANIA_00359 ANIA_00381 ANIA_00417 ANIA_00420 ANIA_00421 ANIA_00433 ANIA_00445 ANIA_00448 ANI…
2.20896e-40	546	1571	1.64136	Gene expression	http://amigo.geneontology.org/amigo/term/GO:0010467	ANIA_00062 ANIA_00072 ANIA_00074 ANIA_00092 ANIA_00105 ANIA_00114 ANIA_00123 ANIA_00124 ANIA_00130 ANIA_00133 ANIA_00134 ANIA_00141 ANIA_00142 ANIA_00189 ANIA_00190 ANIA_00192 ANIA_00204 ANIA_00211 ANIA_00237 ANIA_00242 ANIA_00247 ANIA_00262 ANIA_00278 ANIA_00279 ANIA_00282 ANIA_00292 ANIA_00305 ANIA_00312 ANIA_00321 ANIA_00327 ANIA_00359 ANIA_00364 ANIA_00388 ANIA_00406 ANIA_00421 ANIA_00433 ANI…
4.02262e-40	181	330	2.59031	Translation	http://amigo.geneontology.org/amigo/term/GO:0006412	ANIA_00105 ANIA_00123 ANIA_00142 ANIA_00262 ANIA_00278 ANIA_00292 ANIA_00312 ANIA_00359 ANIA_00406 ANIA_00433 ANIA_00445 ANIA_00465 ANIA_00570 ANIA_00695 ANIA_00776 ANIA_00794 ANIA_00843 ANIA_00872 ANIA_00907 ANIA_00974 ANIA_01013 ANIA_01084 ANIA_01095 ANIA_01122 ANIA_01157 ANIA_01162 ANIA_01166 ANIA_01201 ANIA_01228 ANIA_01256 ANIA_01270 ANIA_01345 ANIA_01709 ANIA_01710 ANIA_01751 ANIA_01770 ANI…
4.60371e-40	708	2215	1.50955	Cellular nitrogen compound metabolic process	http://amigo.geneontology.org/amigo/term/GO:0034641	ANIA_00009 ANIA_00044 ANIA_00062 ANIA_00067 ANIA_00072 ANIA_00074 ANIA_00092 ANIA_00105 ANIA_00114 ANIA_00123 ANIA_00124 ANIA_00126 ANIA_00130 ANIA_00133 ANIA_00134 ANIA_00141 ANIA_00142 ANIA_00189 ANIA_00190 ANIA_00192 ANIA_00204 ANIA_00211 ANIA_00228 ANIA_00237 ANIA_00242 ANIA_00247 ANIA_00258 ANIA_00259 ANIA_00260 ANIA_00262 ANIA_00271 ANIA_00278 ANIA_00279 ANIA_00282 ANIA_00292 ANIA_00305 ANI…
3.83568e-39	187	351	2.51607	Peptide biosynthetic process	http://amigo.geneontology.org/amigo/term/GO:0043043	ANIA_00105 ANIA_00123 ANIA_00142 ANIA_00262 ANIA_00278 ANIA_00292 ANIA_00312 ANIA_00359 ANIA_00406 ANIA_00433 ANIA_00445 ANIA_00465 ANIA_00570 ANIA_00695 ANIA_00776 ANIA_00794 ANIA_00843 ANIA_00872 ANIA_00907 ANIA_00974 ANIA_01013 ANIA_01084 ANIA_01095 ANIA_01122 ANIA_01157 ANIA_01162 ANIA_01166 ANIA_01201 ANIA_01228 ANIA_01256 ANIA_01270 ANIA_01345 ANIA_01709 ANIA_01710 ANIA_01751 ANIA_01770 ANI…
2.62989e-37	81	97	3.94367	Cytosolic ribosome	http://amigo.geneontology.org/amigo/term/GO:0022626	ANIA_00262 ANIA_00278 ANIA_00433 ANIA_00445 ANIA_00465 ANIA_00570 ANIA_00776 ANIA_00843 ANIA_00907 ANIA_01013 ANIA_01122 ANIA_01166 ANIA_01228 ANIA_01256 ANIA_01345 ANIA_01964 ANIA_02268 ANIA_02275 ANIA_02301 ANIA_02734 ANIA_02775 ANIA_02980 ANIA_03096 ANIA_03172 ANIA_03413 ANIA_03706 ANIA_03823 ANIA_04060 ANIA_04073 ANIA_04087 ANIA_04163 ANIA_04202 ANIA_04222 ANIA_04475 ANIA_04494 ANIA_04522 ANI…
3.59936e-36	78	93	3.96095	Preribosome	http://amigo.geneontology.org/amigo/term/GO:0030684	ANIA_00074 ANIA_00092 ANIA_00124 ANIA_00247 ANIA_00305 ANIA_00421 ANIA_00475 ANIA_00647 ANIA_00745 ANIA_00796 ANIA_00946 ANIA_01164 ANIA_01175 ANIA_01272 ANIA_01319 ANIA_01354 ANIA_01367 ANIA_01434 ANIA_01533 ANIA_02077 ANIA_02147 ANIA_02262 ANIA_02926 ANIA_03167 ANIA_03172 ANIA_03313 ANIA_03413 ANIA_03745 ANIA_03794 ANIA_03827 ANIA_03938 ANIA_04065 ANIA_04087 ANIA_04226 ANIA_04232 ANIA_04298 ANI…
4.40264e-36	202	409	2.33247	Amide biosynthetic process	http://amigo.geneontology.org/amigo/term/GO:0043604	ANIA_00105 ANIA_00123 ANIA_00142 ANIA_00262 ANIA_00278 ANIA_00292 ANIA_00312 ANIA_00359 ANIA_00406 ANIA_00433 ANIA_00445 ANIA_00465 ANIA_00554 ANIA_00565 ANIA_00570 ANIA_00695 ANIA_00776 ANIA_00794 ANIA_00843 ANIA_00872 ANIA_00907 ANIA_00974 ANIA_01013 ANIA_01084 ANIA_01095 ANIA_01122 ANIA_01157 ANIA_01162 ANIA_01166 ANIA_01201 ANIA_01202 ANIA_01228 ANIA_01256 ANIA_01270 ANIA_01345 ANIA_01709 ANI…
2.43205e-34	194	394	2.32538	Peptide metabolic process	http://amigo.geneontology.org/amigo/term/GO:0006518	ANIA_00009 ANIA_00105 ANIA_00123 ANIA_00142 ANIA_00262 ANIA_00278 ANIA_00292 ANIA_00312 ANIA_00359 ANIA_00406 ANIA_00433 ANIA_00445 ANIA_00465 ANIA_00570 ANIA_00695 ANIA_00776 ANIA_00794 ANIA_00843 ANIA_00872 ANIA_00907 ANIA_00974 ANIA_01013 ANIA_01084 ANIA_01095 ANIA_01122 ANIA_01157 ANIA_01162 ANIA_01166 ANIA_01201 ANIA_01228 ANIA_01256 ANIA_01270 ANIA_01345 ANIA_01525 ANIA_01709 ANIA_01710 ANI…
3.84212e-34	70	81	4.08132	Ribosomal small subunit biogenesis	http://amigo.geneontology.org/amigo/term/GO:0042274	ANIA_00124 ANIA_00247 ANIA_00305 ANIA_00421 ANIA_00465 ANIA_00475 ANIA_00796 ANIA_00843 ANIA_00944 ANIA_01164 ANIA_01319 ANIA_01354 ANIA_01434 ANIA_01533 ANIA_01964 ANIA_02077 ANIA_02079 ANIA_02147 ANIA_02262 ANIA_02292 ANIA_03056 ANIA_03167 ANIA_03172 ANIA_03313 ANIA_03652 ANIA_03706 ANIA_03745 ANIA_03794 ANIA_03823 ANIA_03938 ANIA_04060 ANIA_04065 ANIA_04226 ANIA_04298 ANIA_04460 ANIA_04534 ANI…
7.3737e-33	306	766	1.8866	Cellular component biogenesis	http://amigo.geneontology.org/amigo/term/GO:0044085	ANIA_00074 ANIA_00092 ANIA_00124 ANIA_00189 ANIA_00204 ANIA_00228 ANIA_00237 ANIA_00247 ANIA_00262 ANIA_00305 ANIA_00316 ANIA_00327 ANIA_00359 ANIA_00383 ANIA_00421 ANIA_00448 ANIA_00465 ANIA_00475 ANIA_00558 ANIA_00559 ANIA_00570 ANIA_00583 ANIA_00589 ANIA_00625 ANIA_00637 ANIA_00647 ANIA_00659 ANIA_00667 ANIA_00676 ANIA_00695 ANIA_00707 ANIA_00715 ANIA_00728 ANIA_00745 ANIA_00794 ANIA_00796 ANI…
2.04956e-32	1213	4553	1.2582	Intracellular anatomical structure	http://amigo.geneontology.org/amigo/term/GO:0005622	ANIA_00009 ANIA_00044 ANIA_00048 ANIA_00050 ANIA_00062 ANIA_00067 ANIA_00072 ANIA_00074 ANIA_00092 ANIA_00104 ANIA_00105 ANIA_00112 ANIA_00114 ANIA_00118 ANIA_00123 ANIA_00124 ANIA_00126 ANIA_00130 ANIA_00131 ANIA_00133 ANIA_00134 ANIA_00142 ANIA_00163 ANIA_00174 ANIA_00179 ANIA_00189 ANIA_00190 ANIA_00192 ANIA_00194 ANIA_00204 ANIA_00211 ANIA_00214 ANIA_00228 ANIA_00237 ANIA_00242 ANIA_00247 ANI…
1.52625e-31	814	2778	1.38382	Macromolecule metabolic process	http://amigo.geneontology.org/amigo/term/GO:0043170	ANIA_00044 ANIA_00062 ANIA_00072 ANIA_00074 ANIA_00092 ANIA_00104 ANIA_00105 ANIA_00114 ANIA_00123 ANIA_00124 ANIA_00126 ANIA_00130 ANIA_00133 ANIA_00134 ANIA_00141 ANIA_00142 ANIA_00189 ANIA_00190 ANIA_00192 ANIA_00204 ANIA_00211 ANIA_00221 ANIA_00228 ANIA_00237 ANIA_00242 ANIA_00247 ANIA_00258 ANIA_00260 ANIA_00262 ANIA_00278 ANIA_00279 ANIA_00282 ANIA_00288 ANIA_00292 ANIA_00305 ANIA_00312 ANI…
1.07158e-30	58	64	4.27992	Maturation of SSU-rRNA	http://amigo.geneontology.org/amigo/term/GO:0030490	ANIA_00124 ANIA_00247 ANIA_00305 ANIA_00421 ANIA_00465 ANIA_00475 ANIA_00944 ANIA_01164 ANIA_01319 ANIA_01354 ANIA_01434 ANIA_01533 ANIA_02077 ANIA_02079 ANIA_02147 ANIA_02292 ANIA_03056 ANIA_03167 ANIA_03172 ANIA_03313 ANIA_03652 ANIA_03745 ANIA_03794 ANIA_03823 ANIA_03938 ANIA_04065 ANIA_04226 ANIA_04298 ANIA_04460 ANIA_04534 ANIA_04594 ANIA_05340 ANIA_05455 ANIA_05785 ANIA_05789 ANIA_05875 ANI…
1.14199e-30	923	3266	1.33467	Nitrogen compound metabolic process	http://amigo.geneontology.org/amigo/term/GO:0006807	ANIA_00009 ANIA_00044 ANIA_00050 ANIA_00062 ANIA_00067 ANIA_00072 ANIA_00074 ANIA_00092 ANIA_00104 ANIA_00105 ANIA_00114 ANIA_00123 ANIA_00124 ANIA_00126 ANIA_00130 ANIA_00133 ANIA_00134 ANIA_00141 ANIA_00142 ANIA_00174 ANIA_00189 ANIA_00190 ANIA_00192 ANIA_00204 ANIA_00211 ANIA_00221 ANIA_00228 ANIA_00237 ANIA_00242 ANIA_00247 ANIA_00258 ANIA_00259 ANIA_00260 ANIA_00262 ANIA_00271 ANIA_00278 ANI…
3.20754e-30	1016	3688	1.30104	Organelle	http://amigo.geneontology.org/amigo/term/GO:0043226	ANIA_00044 ANIA_00048 ANIA_00067 ANIA_00072 ANIA_00074 ANIA_00092 ANIA_00104 ANIA_00105 ANIA_00112 ANIA_00118 ANIA_00123 ANIA_00124 ANIA_00126 ANIA_00131 ANIA_00133 ANIA_00134 ANIA_00142 ANIA_00189 ANIA_00190 ANIA_00192 ANIA_00194 ANIA_00204 ANIA_00211 ANIA_00214 ANIA_00228 ANIA_00237 ANIA_00242 ANIA_00247 ANIA_00248 ANIA_00258 ANIA_00259 ANIA_00260 ANIA_00261 ANIA_00262 ANIA_00276 ANIA_00278 ANI…
3.79997e-30	1015	3685	1.30082	Intracellular organelle	http://amigo.geneontology.org/amigo/term/GO:0043229	ANIA_00044 ANIA_00048 ANIA_00067 ANIA_00072 ANIA_00074 ANIA_00092 ANIA_00104 ANIA_00105 ANIA_00112 ANIA_00118 ANIA_00123 ANIA_00124 ANIA_00126 ANIA_00131 ANIA_00133 ANIA_00134 ANIA_00142 ANIA_00189 ANIA_00190 ANIA_00192 ANIA_00194 ANIA_00204 ANIA_00211 ANIA_00214 ANIA_00228 ANIA_00237 ANIA_00242 ANIA_00247 ANIA_00248 ANIA_00258 ANIA_00259 ANIA_00260 ANIA_00261 ANIA_00262 ANIA_00276 ANIA_00278 ANI…
7.63755e-30	219	498	2.07684	Cellular amide metabolic process	http://amigo.geneontology.org/amigo/term/GO:0043603	ANIA_00009 ANIA_00105 ANIA_00123 ANIA_00142 ANIA_00262 ANIA_00278 ANIA_00292 ANIA_00312 ANIA_00359 ANIA_00406 ANIA_00418 ANIA_00433 ANIA_00445 ANIA_00465 ANIA_00554 ANIA_00565 ANIA_00570 ANIA_00695 ANIA_00776 ANIA_00794 ANIA_00807 ANIA_00843 ANIA_00872 ANIA_00907 ANIA_00974 ANIA_01013 ANIA_01084 ANIA_01095 ANIA_01122 ANIA_01157 ANIA_01162 ANIA_01166 ANIA_01201 ANIA_01202 ANIA_01228 ANIA_01256 ANI…
1.06775e-29	59	67	4.15877	Ribosomal large subunit biogenesis	http://amigo.geneontology.org/amigo/term/GO:0042273	ANIA_00074 ANIA_00092 ANIA_00237 ANIA_00262 ANIA_00448 ANIA_00570 ANIA_00695 ANIA_00707 ANIA_00844 ANIA_00946 ANIA_01013 ANIA_01122 ANIA_01166 ANIA_01228 ANIA_01256 ANIA_01319 ANIA_01367 ANIA_01949 ANIA_02268 ANIA_02693 ANIA_02734 ANIA_02926 ANIA_02980 ANIA_03745 ANIA_03827 ANIA_04232 ANIA_04346 ANIA_04469 ANIA_04475 ANIA_04560 ANIA_04599 ANIA_05177 ANIA_05520 ANIA_05702 ANIA_05865 ANIA_05871 ANI…
1.51343e-28	455	1355	1.58584	Cellular component organization or biogenesis	http://amigo.geneontology.org/amigo/term/GO:0071840	ANIA_00074 ANIA_00092 ANIA_00118 ANIA_00124 ANIA_00133 ANIA_00189 ANIA_00204 ANIA_00228 ANIA_00237 ANIA_00247 ANIA_00261 ANIA_00262 ANIA_00305 ANIA_00316 ANIA_00327 ANIA_00359 ANIA_00383 ANIA_00414 ANIA_00421 ANIA_00448 ANIA_00465 ANIA_00475 ANIA_00558 ANIA_00559 ANIA_00570 ANIA_00583 ANIA_00589 ANIA_00625 ANIA_00637 ANIA_00647 ANIA_00659 ANIA_00667 ANIA_00676 ANIA_00695 ANIA_00707 ANIA_00715 ANI…
4.48357e-28	1021	3750	1.28583	Primary metabolic process	http://amigo.geneontology.org/amigo/term/GO:0044238	ANIA_00044 ANIA_00050 ANIA_00062 ANIA_00067 ANIA_00072 ANIA_00074 ANIA_00092 ANIA_00104 ANIA_00105 ANIA_00114 ANIA_00123 ANIA_00124 ANIA_00126 ANIA_00130 ANIA_00133 ANIA_00134 ANIA_00141 ANIA_00142 ANIA_00150 ANIA_00174 ANIA_00189 ANIA_00190 ANIA_00192 ANIA_00194 ANIA_00204 ANIA_00211 ANIA_00221 ANIA_00228 ANIA_00237 ANIA_00242 ANIA_00246 ANIA_00247 ANIA_00258 ANIA_00259 ANIA_00260 ANIA_00262 ANI…
7.5583e-28	56	64	4.13234	Ribosome	http://www.genome.jp/kegg-bin/show_pathway?ani03010	ANIA_00123 ANIA_00142 ANIA_00445 ANIA_00465 ANIA_00570 ANIA_00776 ANIA_00907 ANIA_01013 ANIA_01095 ANIA_01228 ANIA_01345 ANIA_01770 ANIA_01964 ANIA_02057 ANIA_02734 ANIA_02980 ANIA_03172 ANIA_03413 ANIA_03823 ANIA_04060 ANIA_04073 ANIA_04087 ANIA_04202 ANIA_04222 ANIA_04452 ANIA_04475 ANIA_04522 ANIA_04560 ANIA_04594 ANIA_04802 ANIA_04803 ANIA_04872 ANIA_04916 ANIA_05222 ANIA_05441 ANIA_05715 ANI…
3.41924e-26	320	875	1.72715	Organonitrogen compound biosynthetic process	http://amigo.geneontology.org/amigo/term/GO:1901566	ANIA_00050 ANIA_00067 ANIA_00104 ANIA_00105 ANIA_00123 ANIA_00130 ANIA_00142 ANIA_00259 ANIA_00262 ANIA_00271 ANIA_00278 ANIA_00292 ANIA_00312 ANIA_00357 ANIA_00359 ANIA_00367 ANIA_00406 ANIA_00433 ANIA_00445 ANIA_00465 ANIA_00474 ANIA_00490 ANIA_00502 ANIA_00551 ANIA_00554 ANIA_00565 ANIA_00570 ANIA_00636 ANIA_00667 ANIA_00687 ANIA_00695 ANIA_00776 ANIA_00787 ANIA_00794 ANIA_00843 ANIA_00872 ANI…
6.26664e-26	46	49	4.43353	Cytosolic large ribosomal subunit	http://amigo.geneontology.org/amigo/term/GO:0022625	ANIA_00262 ANIA_00278 ANIA_00433 ANIA_00445 ANIA_00570 ANIA_00776 ANIA_01013 ANIA_01122 ANIA_01166 ANIA_01228 ANIA_02268 ANIA_02275 ANIA_02301 ANIA_02734 ANIA_02980 ANIA_04202 ANIA_04222 ANIA_04475 ANIA_04494 ANIA_04522 ANIA_04560 ANIA_04787 ANIA_04802 ANIA_05014 ANIA_05520 ANIA_05702 ANIA_05719 ANIA_05800 ANIA_05996 ANIA_06082 ANIA_06181 ANIA_06202 ANIA_06500 ANIA_06629 ANIA_07003 ANIA_07107 ANI…
1.22085e-25	63	81	3.67319	Large ribosomal subunit	http://amigo.geneontology.org/amigo/term/GO:0015934	ANIA_00123 ANIA_00262 ANIA_00278 ANIA_00433 ANIA_00445 ANIA_00570 ANIA_00776 ANIA_01013 ANIA_01095 ANIA_01122 ANIA_01166 ANIA_01228 ANIA_01770 ANIA_02057 ANIA_02268 ANIA_02275 ANIA_02301 ANIA_02734 ANIA_02949 ANIA_02980 ANIA_03635 ANIA_03649 ANIA_04202 ANIA_04222 ANIA_04475 ANIA_04494 ANIA_04522 ANIA_04560 ANIA_04652 ANIA_04787 ANIA_04802 ANIA_05014 ANIA_05520 ANIA_05702 ANIA_05719 ANIA_05800 ANI…
1.34722e-25	47	51	4.35226	Maturation of SSU-rRNA from tricistronic rRNA transcript (SSU-rRNA, 5.8S rRNA, LSU-rRNA)	http://amigo.geneontology.org/amigo/term/GO:0000462	ANIA_00124 ANIA_00421 ANIA_00465 ANIA_01164 ANIA_01319 ANIA_01354 ANIA_01533 ANIA_02077 ANIA_02079 ANIA_02147 ANIA_02292 ANIA_03167 ANIA_03172 ANIA_03313 ANIA_03652 ANIA_03745 ANIA_03794 ANIA_03823 ANIA_03938 ANIA_04065 ANIA_04226 ANIA_04460 ANIA_04534 ANIA_04594 ANIA_05340 ANIA_05455 ANIA_05785 ANIA_05789 ANIA_05875 ANIA_05960 ANIA_06085 ANIA_06200 ANIA_06265 ANIA_06266 ANIA_06334 ANIA_06561 ANI…
6.67224e-25	1079	4076	1.25019	Organic substance metabolic process	http://amigo.geneontology.org/amigo/term/GO:0071704	ANIA_00009 ANIA_00030 ANIA_00044 ANIA_00050 ANIA_00062 ANIA_00067 ANIA_00072 ANIA_00074 ANIA_00092 ANIA_00104 ANIA_00105 ANIA_00114 ANIA_00123 ANIA_00124 ANIA_00126 ANIA_00130 ANIA_00133 ANIA_00134 ANIA_00141 ANIA_00142 ANIA_00150 ANIA_00174 ANIA_00179 ANIA_00189 ANIA_00190 ANIA_00192 ANIA_00194 ANIA_00204 ANIA_00211 ANIA_00221 ANIA_00228 ANIA_00237 ANIA_00242 ANIA_00246 ANIA_00247 ANIA_00258 ANI…
9.3637e-23	1024	3868	1.25026	Cellular metabolic process	http://amigo.geneontology.org/amigo/term/GO:0044237	ANIA_00009 ANIA_00044 ANIA_00050 ANIA_00062 ANIA_00067 ANIA_00072 ANIA_00074 ANIA_00092 ANIA_00104 ANIA_00105 ANIA_00114 ANIA_00123 ANIA_00124 ANIA_00126 ANIA_00130 ANIA_00133 ANIA_00134 ANIA_00141 ANIA_00142 ANIA_00150 ANIA_00174 ANIA_00189 ANIA_00190 ANIA_00192 ANIA_00193 ANIA_00204 ANIA_00211 ANIA_00228 ANIA_00237 ANIA_00242 ANIA_00246 ANIA_00247 ANIA_00258 ANIA_00259 ANIA_00260 ANIA_00262 ANI…
1.84237e-20	542	1815	1.4103	Nucleobase-containing compound metabolic process	http://amigo.geneontology.org/amigo/term/GO:0006139	ANIA_00044 ANIA_00062 ANIA_00067 ANIA_00072 ANIA_00074 ANIA_00092 ANIA_00114 ANIA_00124 ANIA_00126 ANIA_00130 ANIA_00133 ANIA_00134 ANIA_00141 ANIA_00189 ANIA_00190 ANIA_00192 ANIA_00204 ANIA_00211 ANIA_00228 ANIA_00237 ANIA_00242 ANIA_00247 ANIA_00258 ANIA_00259 ANIA_00260 ANIA_00271 ANIA_00279 ANIA_00282 ANIA_00292 ANIA_00305 ANIA_00312 ANIA_00321 ANIA_00327 ANIA_00357 ANIA_00364 ANIA_00388 ANI…
2.29465e-20	49	62	3.73243	Small ribosomal subunit	http://amigo.geneontology.org/amigo/term/GO:0015935	ANIA_00142 ANIA_00465 ANIA_00843 ANIA_00907 ANIA_01345 ANIA_01954 ANIA_01964 ANIA_02775 ANIA_03096 ANIA_03172 ANIA_03173 ANIA_03413 ANIA_03706 ANIA_03744 ANIA_03823 ANIA_04060 ANIA_04073 ANIA_04087 ANIA_04163 ANIA_04251 ANIA_04434 ANIA_04468 ANIA_04594 ANIA_04613 ANIA_04794 ANIA_04803 ANIA_04916 ANIA_05164 ANIA_05222 ANIA_05441 ANIA_05522 ANIA_05715 ANIA_05960 ANIA_05979 ANIA_05997 ANIA_06039 ANI…
6.25747e-20	424	1346	1.48768	Nucleic acid binding	http://amigo.geneontology.org/amigo/term/GO:0003676	ANIA_00044 ANIA_00062 ANIA_00072 ANIA_00105 ANIA_00123 ANIA_00126 ANIA_00133 ANIA_00142 ANIA_00189 ANIA_00190 ANIA_00204 ANIA_00211 ANIA_00228 ANIA_00242 ANIA_00247 ANIA_00260 ANIA_00262 ANIA_00279 ANIA_00282 ANIA_00292 ANIA_00305 ANIA_00312 ANIA_00321 ANIA_00359 ANIA_00364 ANIA_00388 ANIA_00406 ANIA_00421 ANIA_00433 ANIA_00445 ANIA_00507 ANIA_00570 ANIA_00578 ANIA_00583 ANIA_00585 ANIA_00589 ANI…
1.53773e-19	577	1976	1.37904	Nucleus	http://amigo.geneontology.org/amigo/term/GO:0005634	ANIA_00044 ANIA_00067 ANIA_00074 ANIA_00092 ANIA_00105 ANIA_00124 ANIA_00126 ANIA_00133 ANIA_00134 ANIA_00189 ANIA_00190 ANIA_00192 ANIA_00204 ANIA_00211 ANIA_00214 ANIA_00228 ANIA_00237 ANIA_00242 ANIA_00247 ANIA_00258 ANIA_00260 ANIA_00276 ANIA_00279 ANIA_00282 ANIA_00288 ANIA_00292 ANIA_00305 ANIA_00310 ANIA_00312 ANIA_00321 ANIA_00327 ANIA_00364 ANIA_00388 ANIA_00420 ANIA_00421 ANIA_00448 ANI…
4.1254e-19	472	1551	1.4372	Nucleic acid metabolic process	http://amigo.geneontology.org/amigo/term/GO:0090304	ANIA_00044 ANIA_00062 ANIA_00072 ANIA_00074 ANIA_00092 ANIA_00114 ANIA_00124 ANIA_00126 ANIA_00130 ANIA_00133 ANIA_00134 ANIA_00141 ANIA_00189 ANIA_00190 ANIA_00192 ANIA_00204 ANIA_00211 ANIA_00228 ANIA_00237 ANIA_00242 ANIA_00247 ANIA_00258 ANIA_00260 ANIA_00279 ANIA_00282 ANIA_00292 ANIA_00305 ANIA_00312 ANIA_00321 ANIA_00327 ANIA_00364 ANIA_00388 ANIA_00392 ANIA_00406 ANIA_00421 ANIA_00448 ANI…
2.18425e-18	412	1321	1.47293	RNA metabolic process	http://amigo.geneontology.org/amigo/term/GO:0016070	ANIA_00062 ANIA_00072 ANIA_00074 ANIA_00092 ANIA_00114 ANIA_00124 ANIA_00130 ANIA_00133 ANIA_00134 ANIA_00141 ANIA_00189 ANIA_00190 ANIA_00192 ANIA_00204 ANIA_00211 ANIA_00237 ANIA_00242 ANIA_00247 ANIA_00258 ANIA_00260 ANIA_00279 ANIA_00282 ANIA_00292 ANIA_00305 ANIA_00312 ANIA_00321 ANIA_00327 ANIA_00364 ANIA_00388 ANIA_00406 ANIA_00421 ANIA_00448 ANIA_00465 ANIA_00475 ANIA_00502 ANIA_00507 ANI…
3.74835e-18	567	1959	1.3669	Heterocycle metabolic process	http://amigo.geneontology.org/amigo/term/GO:0046483	ANIA_00044 ANIA_00062 ANIA_00067 ANIA_00072 ANIA_00074 ANIA_00092 ANIA_00114 ANIA_00124 ANIA_00126 ANIA_00130 ANIA_00133 ANIA_00134 ANIA_00141 ANIA_00150 ANIA_00189 ANIA_00190 ANIA_00192 ANIA_00204 ANIA_00211 ANIA_00228 ANIA_00237 ANIA_00242 ANIA_00247 ANIA_00258 ANIA_00259 ANIA_00260 ANIA_00271 ANIA_00279 ANIA_00282 ANIA_00292 ANIA_00305 ANIA_00312 ANIA_00321 ANIA_00327 ANIA_00357 ANIA_00364 ANI…
3.93979e-18	594	2073	1.35324	Organic cyclic compound metabolic process	http://amigo.geneontology.org/amigo/term/GO:1901360	ANIA_00044 ANIA_00050 ANIA_00062 ANIA_00067 ANIA_00072 ANIA_00074 ANIA_00092 ANIA_00114 ANIA_00124 ANIA_00126 ANIA_00130 ANIA_00133 ANIA_00134 ANIA_00141 ANIA_00150 ANIA_00189 ANIA_00190 ANIA_00192 ANIA_00204 ANIA_00211 ANIA_00228 ANIA_00237 ANIA_00242 ANIA_00247 ANIA_00258 ANIA_00259 ANIA_00260 ANIA_00271 ANIA_00279 ANIA_00282 ANIA_00292 ANIA_00305 ANIA_00312 ANIA_00321 ANIA_00327 ANIA_00357 ANI…
5.13283e-18	1145	4534	1.19265	Metabolic process	http://amigo.geneontology.org/amigo/term/GO:0008152	ANIA_00009 ANIA_00030 ANIA_00044 ANIA_00050 ANIA_00054 ANIA_00062 ANIA_00067 ANIA_00072 ANIA_00074 ANIA_00092 ANIA_00104 ANIA_00105 ANIA_00114 ANIA_00123 ANIA_00124 ANIA_00126 ANIA_00130 ANIA_00133 ANIA_00134 ANIA_00141 ANIA_00142 ANIA_00150 ANIA_00174 ANIA_00179 ANIA_00189 ANIA_00190 ANIA_00192 ANIA_00193 ANIA_00194 ANIA_00204 ANIA_00211 ANIA_00221 ANIA_00228 ANIA_00237 ANIA_00242 ANIA_00246 ANI…
2.00046e-17	569	1981	1.35649	Cellular aromatic compound metabolic process	http://amigo.geneontology.org/amigo/term/GO:0006725	ANIA_00044 ANIA_00050 ANIA_00062 ANIA_00067 ANIA_00072 ANIA_00074 ANIA_00092 ANIA_00114 ANIA_00124 ANIA_00126 ANIA_00130 ANIA_00133 ANIA_00134 ANIA_00141 ANIA_00150 ANIA_00189 ANIA_00190 ANIA_00192 ANIA_00204 ANIA_00211 ANIA_00228 ANIA_00237 ANIA_00242 ANIA_00247 ANIA_00258 ANIA_00259 ANIA_00260 ANIA_00271 ANIA_00279 ANIA_00282 ANIA_00292 ANIA_00305 ANIA_00312 ANIA_00321 ANIA_00327 ANIA_00357 ANI…
4.40596e-17	29	30	4.56525	Maturation of LSU-rRNA	http://amigo.geneontology.org/amigo/term/GO:0000470	ANIA_00092 ANIA_00237 ANIA_00448 ANIA_00695 ANIA_00707 ANIA_01122 ANIA_01228 ANIA_01319 ANIA_01367 ANIA_01949 ANIA_02693 ANIA_02926 ANIA_03827 ANIA_04346 ANIA_04469 ANIA_04599 ANIA_05520 ANIA_06612 ANIA_06696 ANIA_06698 ANIA_06822 ANIA_07107 ANIA_08073 ANIA_08225 ANIA_08247 ANIA_08491 ANIA_08834 ANIA_10055 ANIA_10200
9.26795e-17	33	37	4.21211	Maturation of 5.8S rRNA	http://amigo.geneontology.org/amigo/term/GO:0000460	ANIA_00092 ANIA_00237 ANIA_00421 ANIA_00707 ANIA_02147 ANIA_02926 ANIA_03167 ANIA_03172 ANIA_03652 ANIA_03657 ANIA_03745 ANIA_03823 ANIA_03827 ANIA_04065 ANIA_04412 ANIA_04469 ANIA_04599 ANIA_04617 ANIA_05785 ANIA_05789 ANIA_05875 ANIA_06111 ANIA_06244 ANIA_06612 ANIA_06822 ANIA_07305 ANIA_08247 ANIA_08834 ANIA_10055 ANIA_10406 ANIA_10590 ANIA_10618 ANIA_11250
1.17653e-16	30	32	4.4275	Cleavage involved in rRNA processing	http://amigo.geneontology.org/amigo/term/GO:0000469	ANIA_00421 ANIA_00695 ANIA_00707 ANIA_01474 ANIA_03167 ANIA_03172 ANIA_03652 ANIA_03657 ANIA_03745 ANIA_03823 ANIA_04065 ANIA_04460 ANIA_04599 ANIA_04617 ANIA_05785 ANIA_05789 ANIA_05875 ANIA_06111 ANIA_06244 ANIA_06266 ANIA_06334 ANIA_06561 ANIA_06822 ANIA_07305 ANIA_08253 ANIA_08254 ANIA_10055 ANIA_10406 ANIA_10618 ANIA_11250
3.76923e-16	994	3881	1.20957	Binding	http://amigo.geneontology.org/amigo/term/GO:0005488	ANIA_00044 ANIA_00051 ANIA_00062 ANIA_00067 ANIA_00072 ANIA_00077 ANIA_00105 ANIA_00114 ANIA_00118 ANIA_00123 ANIA_00124 ANIA_00126 ANIA_00131 ANIA_00133 ANIA_00142 ANIA_00150 ANIA_00174 ANIA_00182 ANIA_00189 ANIA_00190 ANIA_00203 ANIA_00204 ANIA_00211 ANIA_00214 ANIA_00221 ANIA_00228 ANIA_00242 ANIA_00247 ANIA_00258 ANIA_00259 ANIA_00260 ANIA_00261 ANIA_00262 ANIA_00267 ANIA_00271 ANIA_00279 ANI…
5.39911e-16	65	111	2.76553	Ribonucleoprotein complex assembly	http://amigo.geneontology.org/amigo/term/GO:0022618	ANIA_00262 ANIA_00327 ANIA_00359 ANIA_00421 ANIA_00448 ANIA_00728 ANIA_00843 ANIA_01013 ANIA_01166 ANIA_01270 ANIA_01495 ANIA_01635 ANIA_02007 ANIA_02105 ANIA_02268 ANIA_02693 ANIA_02734 ANIA_02743 ANIA_02907 ANIA_02997 ANIA_03055 ANIA_03172 ANIA_03411 ANIA_03427 ANIA_03706 ANIA_04060 ANIA_04232 ANIA_04259 ANIA_04470 ANIA_04475 ANIA_04560 ANIA_04760 ANIA_05745 ANIA_05865 ANIA_05954 ANIA_05960 ANI…
6.22591e-16	412	1360	1.43069	Macromolecule biosynthetic process	http://amigo.geneontology.org/amigo/term/GO:0009059	ANIA_00104 ANIA_00105 ANIA_00123 ANIA_00134 ANIA_00142 ANIA_00192 ANIA_00228 ANIA_00260 ANIA_00262 ANIA_00278 ANIA_00279 ANIA_00292 ANIA_00312 ANIA_00321 ANIA_00327 ANIA_00359 ANIA_00364 ANIA_00367 ANIA_00388 ANIA_00406 ANIA_00433 ANIA_00445 ANIA_00465 ANIA_00507 ANIA_00551 ANIA_00554 ANIA_00558 ANIA_00570 ANIA_00585 ANIA_00636 ANIA_00667 ANIA_00680 ANIA_00683 ANIA_00695 ANIA_00707 ANIA_00752 ANI…
9.25868e-16	893	3432	1.22883	Membrane-bounded organelle	http://amigo.geneontology.org/amigo/term/GO:0043227	ANIA_00044 ANIA_00048 ANIA_00067 ANIA_00072 ANIA_00074 ANIA_00092 ANIA_00104 ANIA_00105 ANIA_00112 ANIA_00123 ANIA_00124 ANIA_00126 ANIA_00131 ANIA_00133 ANIA_00134 ANIA_00142 ANIA_00189 ANIA_00190 ANIA_00192 ANIA_00194 ANIA_00204 ANIA_00211 ANIA_00214 ANIA_00228 ANIA_00237 ANIA_00242 ANIA_00247 ANIA_00248 ANIA_00258 ANIA_00259 ANIA_00260 ANIA_00261 ANIA_00276 ANIA_00279 ANIA_00282 ANIA_00288 ANI…
9.43225e-16	406	1339	1.43197	Cellular macromolecule biosynthetic process	http://amigo.geneontology.org/amigo/term/GO:0034645	ANIA_00104 ANIA_00105 ANIA_00123 ANIA_00134 ANIA_00142 ANIA_00192 ANIA_00228 ANIA_00260 ANIA_00262 ANIA_00278 ANIA_00279 ANIA_00292 ANIA_00312 ANIA_00321 ANIA_00327 ANIA_00359 ANIA_00364 ANIA_00367 ANIA_00388 ANIA_00406 ANIA_00433 ANIA_00445 ANIA_00465 ANIA_00507 ANIA_00551 ANIA_00554 ANIA_00558 ANIA_00570 ANIA_00585 ANIA_00636 ANIA_00667 ANIA_00680 ANIA_00683 ANIA_00695 ANIA_00707 ANIA_00752 ANI…
9.43225e-16	892	3428	1.22889	Intracellular membrane-bounded organelle	http://amigo.geneontology.org/amigo/term/GO:0043231	ANIA_00044 ANIA_00048 ANIA_00067 ANIA_00072 ANIA_00074 ANIA_00092 ANIA_00104 ANIA_00105 ANIA_00112 ANIA_00123 ANIA_00124 ANIA_00126 ANIA_00131 ANIA_00133 ANIA_00134 ANIA_00142 ANIA_00189 ANIA_00190 ANIA_00192 ANIA_00194 ANIA_00204 ANIA_00211 ANIA_00214 ANIA_00228 ANIA_00237 ANIA_00242 ANIA_00247 ANIA_00248 ANIA_00258 ANIA_00259 ANIA_00260 ANIA_00261 ANIA_00276 ANIA_00279 ANIA_00282 ANIA_00288 ANI…
1.18807e-15	66	115	2.7104	Ribonucleoprotein complex subunit organization	http://amigo.geneontology.org/amigo/term/GO:0071826	ANIA_00133 ANIA_00262 ANIA_00327 ANIA_00359 ANIA_00421 ANIA_00448 ANIA_00728 ANIA_00843 ANIA_01013 ANIA_01166 ANIA_01270 ANIA_01495 ANIA_01635 ANIA_02007 ANIA_02105 ANIA_02268 ANIA_02693 ANIA_02734 ANIA_02743 ANIA_02907 ANIA_02997 ANIA_03055 ANIA_03172 ANIA_03411 ANIA_03427 ANIA_03706 ANIA_04060 ANIA_04232 ANIA_04259 ANIA_04470 ANIA_04475 ANIA_04560 ANIA_04760 ANIA_05745 ANIA_05865 ANIA_05954 ANI…
1.55269e-15	669	2447	1.29116	Heterocyclic compound binding	http://amigo.geneontology.org/amigo/term/GO:1901363	ANIA_00044 ANIA_00062 ANIA_00072 ANIA_00105 ANIA_00114 ANIA_00118 ANIA_00123 ANIA_00124 ANIA_00126 ANIA_00133 ANIA_00142 ANIA_00174 ANIA_00182 ANIA_00189 ANIA_00190 ANIA_00204 ANIA_00211 ANIA_00228 ANIA_00242 ANIA_00247 ANIA_00259 ANIA_00260 ANIA_00262 ANIA_00279 ANIA_00282 ANIA_00292 ANIA_00305 ANIA_00312 ANIA_00316 ANIA_00321 ANIA_00327 ANIA_00357 ANIA_00359 ANIA_00364 ANIA_00381 ANIA_00388 ANI…
2.49363e-15	33	39	3.9961	90S preribosome	http://amigo.geneontology.org/amigo/term/GO:0030686	ANIA_00247 ANIA_00305 ANIA_00421 ANIA_00647 ANIA_00946 ANIA_01272 ANIA_01367 ANIA_01434 ANIA_01533 ANIA_03172 ANIA_03794 ANIA_03827 ANIA_03938 ANIA_04065 ANIA_04298 ANIA_04460 ANIA_04469 ANIA_04751 ANIA_04916 ANIA_05455 ANIA_05871 ANIA_06171 ANIA_06265 ANIA_06334 ANIA_06561 ANIA_06696 ANIA_06698 ANIA_07458 ANIA_08079 ANIA_08183 ANIA_08293 ANIA_10232 ANIA_10618
2.8696e-15	669	2453	1.288	Organic cyclic compound binding	http://amigo.geneontology.org/amigo/term/GO:0097159	ANIA_00044 ANIA_00062 ANIA_00072 ANIA_00105 ANIA_00114 ANIA_00118 ANIA_00123 ANIA_00124 ANIA_00126 ANIA_00133 ANIA_00142 ANIA_00174 ANIA_00182 ANIA_00189 ANIA_00190 ANIA_00204 ANIA_00211 ANIA_00228 ANIA_00242 ANIA_00247 ANIA_00259 ANIA_00260 ANIA_00262 ANIA_00279 ANIA_00282 ANIA_00292 ANIA_00305 ANIA_00312 ANIA_00316 ANIA_00321 ANIA_00327 ANIA_00357 ANIA_00359 ANIA_00364 ANIA_00381 ANIA_00388 ANI…
3.75011e-15	235	682	1.62731	Cytosol	http://amigo.geneontology.org/amigo/term/GO:0005829	ANIA_00009 ANIA_00050 ANIA_00062 ANIA_00067 ANIA_00105 ANIA_00124 ANIA_00134 ANIA_00163 ANIA_00179 ANIA_00228 ANIA_00242 ANIA_00262 ANIA_00278 ANIA_00292 ANIA_00321 ANIA_00381 ANIA_00395 ANIA_00433 ANIA_00445 ANIA_00465 ANIA_00474 ANIA_00554 ANIA_00565 ANIA_00570 ANIA_00667 ANIA_00776 ANIA_00843 ANIA_00907 ANIA_00922 ANIA_00926 ANIA_01013 ANIA_01103 ANIA_01115 ANIA_01122 ANIA_01162 ANIA_01166 ANI…
7.92803e-15	31	36	4.06674	Small-subunit processome	http://amigo.geneontology.org/amigo/term/GO:0032040	ANIA_00305 ANIA_00475 ANIA_00647 ANIA_00745 ANIA_00796 ANIA_01164 ANIA_01319 ANIA_01354 ANIA_01434 ANIA_01533 ANIA_02077 ANIA_02147 ANIA_03167 ANIA_03413 ANIA_03794 ANIA_03938 ANIA_04226 ANIA_04298 ANIA_04456 ANIA_04460 ANIA_04916 ANIA_05340 ANIA_05455 ANIA_05875 ANIA_06171 ANIA_06265 ANIA_07458 ANIA_08183 ANIA_08293 ANIA_10052 ANIA_10352
1.07453e-14	33	40	3.8962	Ribosome assembly	http://amigo.geneontology.org/amigo/term/GO:0042255	ANIA_00262 ANIA_00421 ANIA_00843 ANIA_01013 ANIA_01166 ANIA_02268 ANIA_02734 ANIA_03172 ANIA_03706 ANIA_03745 ANIA_04060 ANIA_04232 ANIA_04475 ANIA_04560 ANIA_04652 ANIA_05960 ANIA_05979 ANIA_05997 ANIA_06202 ANIA_06310 ANIA_06632 ANIA_06902 ANIA_07305 ANIA_08183 ANIA_08491 ANIA_08704 ANIA_08834 ANIA_08856 ANIA_10055 ANIA_10058 ANIA_10200 ANIA_10943 ANIA_10955
2.52895e-14	46	69	3.14845	Cytoplasmic translation	http://amigo.geneontology.org/amigo/term/GO:0002181	ANIA_00278 ANIA_00359 ANIA_00445 ANIA_00570 ANIA_00776 ANIA_01166 ANIA_01270 ANIA_01751 ANIA_02275 ANIA_02734 ANIA_02743 ANIA_02907 ANIA_02932 ANIA_02980 ANIA_02997 ANIA_03055 ANIA_03172 ANIA_03411 ANIA_03427 ANIA_04087 ANIA_04259 ANIA_04470 ANIA_04594 ANIA_04616 ANIA_04916 ANIA_05014 ANIA_05111 ANIA_05719 ANIA_05745 ANIA_05954 ANIA_05996 ANIA_06082 ANIA_07105 ANIA_07107 ANIA_07350 ANIA_07540 ANI…
4.27468e-14	33	41	3.80117	Cytosolic small ribosomal subunit	http://amigo.geneontology.org/amigo/term/GO:0022627	ANIA_00465 ANIA_00843 ANIA_00907 ANIA_01345 ANIA_01964 ANIA_02775 ANIA_03096 ANIA_03172 ANIA_03413 ANIA_03706 ANIA_03823 ANIA_04060 ANIA_04073 ANIA_04087 ANIA_04163 ANIA_04594 ANIA_04794 ANIA_04803 ANIA_04916 ANIA_05222 ANIA_05522 ANIA_05715 ANIA_05960 ANIA_05979 ANIA_05997 ANIA_06632 ANIA_06679 ANIA_07449 ANIA_08870 ANIA_09097 ANIA_09468 ANIA_10130 ANIA_11411
1.22623e-13	382	1278	1.41163	Protein metabolic process	http://amigo.geneontology.org/amigo/term/GO:0019538	ANIA_00044 ANIA_00104 ANIA_00105 ANIA_00123 ANIA_00124 ANIA_00134 ANIA_00142 ANIA_00262 ANIA_00278 ANIA_00288 ANIA_00292 ANIA_00312 ANIA_00327 ANIA_00359 ANIA_00367 ANIA_00380 ANIA_00406 ANIA_00433 ANIA_00445 ANIA_00465 ANIA_00551 ANIA_00570 ANIA_00636 ANIA_00667 ANIA_00695 ANIA_00707 ANIA_00745 ANIA_00747 ANIA_00750 ANIA_00776 ANIA_00787 ANIA_00794 ANIA_00814 ANIA_00822 ANIA_00843 ANIA_00872 ANI…
1.44457e-13	415	1414	1.38607	Cellular nitrogen compound biosynthetic process	http://amigo.geneontology.org/amigo/term/GO:0044271	ANIA_00067 ANIA_00105 ANIA_00123 ANIA_00134 ANIA_00142 ANIA_00192 ANIA_00259 ANIA_00260 ANIA_00262 ANIA_00271 ANIA_00278 ANIA_00279 ANIA_00292 ANIA_00312 ANIA_00321 ANIA_00327 ANIA_00357 ANIA_00359 ANIA_00364 ANIA_00388 ANIA_00406 ANIA_00433 ANIA_00445 ANIA_00465 ANIA_00474 ANIA_00490 ANIA_00507 ANIA_00554 ANIA_00565 ANIA_00570 ANIA_00585 ANIA_00667 ANIA_00680 ANIA_00683 ANIA_00687 ANIA_00695 ANI…
1.73374e-13	100	226	2.08968	Catalytic activity, acting on RNA	http://amigo.geneontology.org/amigo/term/GO:0140098	ANIA_00092 ANIA_00130 ANIA_00141 ANIA_00189 ANIA_00190 ANIA_00192 ANIA_00204 ANIA_00228 ANIA_00260 ANIA_00321 ANIA_00502 ANIA_00583 ANIA_00589 ANIA_00625 ANIA_00637 ANIA_00707 ANIA_00745 ANIA_00752 ANIA_00757 ANIA_00818 ANIA_00894 ANIA_00944 ANIA_00956 ANIA_00997 ANIA_01201 ANIA_01447 ANIA_01474 ANIA_01709 ANIA_01710 ANIA_01723 ANIA_01750 ANIA_01751 ANIA_01949 ANIA_01957 ANIA_02135 ANIA_02185 ANI…
2.48781e-13	801	3081	1.2278	Cytoplasm	http://amigo.geneontology.org/amigo/term/GO:0005737	ANIA_00009 ANIA_00044 ANIA_00048 ANIA_00050 ANIA_00062 ANIA_00067 ANIA_00072 ANIA_00104 ANIA_00105 ANIA_00112 ANIA_00114 ANIA_00118 ANIA_00123 ANIA_00124 ANIA_00130 ANIA_00131 ANIA_00133 ANIA_00134 ANIA_00142 ANIA_00163 ANIA_00174 ANIA_00179 ANIA_00189 ANIA_00194 ANIA_00204 ANIA_00214 ANIA_00228 ANIA_00242 ANIA_00248 ANIA_00258 ANIA_00259 ANIA_00261 ANIA_00262 ANIA_00268 ANIA_00278 ANIA_00282 ANI…
3.89604e-13	27	31	4.11329	Maturation of 5.8S rRNA from tricistronic rRNA transcript (SSU-rRNA, 5.8S rRNA, LSU-rRNA)	http://amigo.geneontology.org/amigo/term/GO:0000466	ANIA_00092 ANIA_00237 ANIA_00421 ANIA_00707 ANIA_02147 ANIA_02926 ANIA_03167 ANIA_03172 ANIA_03652 ANIA_03657 ANIA_03745 ANIA_03823 ANIA_03827 ANIA_04065 ANIA_04469 ANIA_04599 ANIA_04617 ANIA_05785 ANIA_05789 ANIA_05875 ANIA_06111 ANIA_06244 ANIA_07305 ANIA_10055 ANIA_10406 ANIA_10618 ANIA_11250
5.0147e-13	602	2214	1.28412	Cellular macromolecule metabolic process	http://amigo.geneontology.org/amigo/term/GO:0044260	ANIA_00044 ANIA_00092 ANIA_00104 ANIA_00105 ANIA_00123 ANIA_00124 ANIA_00126 ANIA_00130 ANIA_00134 ANIA_00141 ANIA_00142 ANIA_00192 ANIA_00228 ANIA_00242 ANIA_00258 ANIA_00260 ANIA_00262 ANIA_00278 ANIA_00279 ANIA_00282 ANIA_00288 ANIA_00292 ANIA_00312 ANIA_00321 ANIA_00327 ANIA_00359 ANIA_00364 ANIA_00367 ANIA_00380 ANIA_00388 ANIA_00406 ANIA_00433 ANIA_00445 ANIA_00465 ANIA_00507 ANIA_00551 ANI…
5.42104e-13	344	1136	1.4301	Cellular protein metabolic process	http://amigo.geneontology.org/amigo/term/GO:0044267	ANIA_00044 ANIA_00104 ANIA_00105 ANIA_00123 ANIA_00124 ANIA_00134 ANIA_00142 ANIA_00262 ANIA_00278 ANIA_00288 ANIA_00292 ANIA_00312 ANIA_00327 ANIA_00359 ANIA_00367 ANIA_00380 ANIA_00406 ANIA_00433 ANIA_00445 ANIA_00465 ANIA_00551 ANIA_00570 ANIA_00636 ANIA_00667 ANIA_00695 ANIA_00707 ANIA_00745 ANIA_00747 ANIA_00776 ANIA_00787 ANIA_00794 ANIA_00814 ANIA_00822 ANIA_00843 ANIA_00872 ANIA_00883 ANI…
7.40048e-13	144	378	1.79911	Catalytic activity, acting on a nucleic acid	http://amigo.geneontology.org/amigo/term/GO:0140640	ANIA_00044 ANIA_00092 ANIA_00130 ANIA_00133 ANIA_00141 ANIA_00189 ANIA_00190 ANIA_00192 ANIA_00204 ANIA_00228 ANIA_00260 ANIA_00321 ANIA_00327 ANIA_00502 ANIA_00583 ANIA_00589 ANIA_00625 ANIA_00637 ANIA_00707 ANIA_00745 ANIA_00752 ANIA_00757 ANIA_00818 ANIA_00872 ANIA_00894 ANIA_00944 ANIA_00956 ANIA_00997 ANIA_01201 ANIA_01447 ANIA_01474 ANIA_01564 ANIA_01708 ANIA_01709 ANIA_01710 ANIA_01723 ANI…
8.27723e-12	54	98	2.60229	RNA modification	http://amigo.geneontology.org/amigo/term/GO:0009451	ANIA_00062 ANIA_00072 ANIA_00092 ANIA_00130 ANIA_00141 ANIA_00247 ANIA_00502 ANIA_00625 ANIA_00695 ANIA_00728 ANIA_00745 ANIA_00757 ANIA_00804 ANIA_00818 ANIA_00956 ANIA_01351 ANIA_01751 ANIA_01957 ANIA_02190 ANIA_02451 ANIA_02735 ANIA_03167 ANIA_03170 ANIA_03313 ANIA_03603 ANIA_04093 ANIA_04889 ANIA_04994 ANIA_05155 ANIA_05789 ANIA_05871 ANIA_06165 ANIA_06577 ANIA_06604 ANIA_07028 ANIA_08066 ANI…
8.40887e-12	48	82	2.76449	Non-membrane-bounded organelle assembly	http://amigo.geneontology.org/amigo/term/GO:0140694	ANIA_00262 ANIA_00421 ANIA_00676 ANIA_00715 ANIA_00843 ANIA_00848 ANIA_01013 ANIA_01166 ANIA_01382 ANIA_02128 ANIA_02268 ANIA_02734 ANIA_02862 ANIA_03172 ANIA_03706 ANIA_03745 ANIA_04060 ANIA_04232 ANIA_04475 ANIA_04560 ANIA_04652 ANIA_05057 ANIA_05115 ANIA_05960 ANIA_05979 ANIA_05997 ANIA_06202 ANIA_06310 ANIA_06340 ANIA_06554 ANIA_06632 ANIA_06865 ANIA_06902 ANIA_06978 ANIA_07305 ANIA_08183 ANI…
1.89223e-11	548	2018	1.28247	Cellular biosynthetic process	http://amigo.geneontology.org/amigo/term/GO:0044249	ANIA_00050 ANIA_00067 ANIA_00104 ANIA_00105 ANIA_00123 ANIA_00134 ANIA_00142 ANIA_00150 ANIA_00192 ANIA_00228 ANIA_00259 ANIA_00260 ANIA_00262 ANIA_00271 ANIA_00278 ANIA_00279 ANIA_00292 ANIA_00312 ANIA_00321 ANIA_00327 ANIA_00357 ANIA_00359 ANIA_00364 ANIA_00367 ANIA_00388 ANIA_00406 ANIA_00433 ANIA_00445 ANIA_00465 ANIA_00474 ANIA_00490 ANIA_00507 ANIA_00551 ANIA_00554 ANIA_00558 ANIA_00565 ANI…
2.61172e-11	563	2086	1.27462	Organic substance biosynthetic process	http://amigo.geneontology.org/amigo/term/GO:1901576	ANIA_00050 ANIA_00067 ANIA_00104 ANIA_00105 ANIA_00123 ANIA_00130 ANIA_00134 ANIA_00142 ANIA_00150 ANIA_00192 ANIA_00228 ANIA_00259 ANIA_00260 ANIA_00262 ANIA_00271 ANIA_00278 ANIA_00279 ANIA_00292 ANIA_00312 ANIA_00321 ANIA_00327 ANIA_00357 ANIA_00359 ANIA_00364 ANIA_00367 ANIA_00388 ANIA_00406 ANIA_00433 ANIA_00445 ANIA_00465 ANIA_00474 ANIA_00490 ANIA_00502 ANIA_00507 ANIA_00551 ANIA_00554 ANI…
1.07635e-10	27	35	3.6432	RRNA binding	http://amigo.geneontology.org/amigo/term/GO:0019843	ANIA_00262 ANIA_00421 ANIA_00647 ANIA_00707 ANIA_00843 ANIA_01013 ANIA_01354 ANIA_01770 ANIA_02734 ANIA_03413 ANIA_04232 ANIA_04494 ANIA_04787 ANIA_04794 ANIA_04803 ANIA_05164 ANIA_05960 ANIA_06171 ANIA_06679 ANIA_07449 ANIA_08834 ANIA_09465 ANIA_10052 ANIA_10055 ANIA_10161 ANIA_10200 ANIA_10943
2.25988e-10	20	22	4.29334	Endonucleolytic cleavage involved in rRNA processing	http://amigo.geneontology.org/amigo/term/GO:0000478	ANIA_00421 ANIA_00707 ANIA_01474 ANIA_03167 ANIA_03172 ANIA_03652 ANIA_03745 ANIA_03823 ANIA_04065 ANIA_04460 ANIA_04599 ANIA_05785 ANIA_05789 ANIA_05875 ANIA_06266 ANIA_06334 ANIA_06822 ANIA_07305 ANIA_10055 ANIA_10618
2.25988e-10	535	1988	1.27094	Organonitrogen compound metabolic process	http://amigo.geneontology.org/amigo/term/GO:1901564	ANIA_00009 ANIA_00044 ANIA_00050 ANIA_00067 ANIA_00104 ANIA_00105 ANIA_00123 ANIA_00124 ANIA_00130 ANIA_00134 ANIA_00142 ANIA_00174 ANIA_00221 ANIA_00259 ANIA_00262 ANIA_00271 ANIA_00278 ANIA_00288 ANIA_00292 ANIA_00312 ANIA_00327 ANIA_00357 ANIA_00359 ANIA_00367 ANIA_00380 ANIA_00406 ANIA_00418 ANIA_00433 ANIA_00445 ANIA_00465 ANIA_00474 ANIA_00490 ANIA_00502 ANIA_00549 ANIA_00551 ANIA_00554 ANI…
5.15008e-10	18	19	4.47411	Maturation of LSU-rRNA from tricistronic rRNA transcript (SSU-rRNA, 5.8S rRNA, LSU-rRNA)	http://amigo.geneontology.org/amigo/term/GO:0000463	ANIA_00092 ANIA_00237 ANIA_00448 ANIA_00707 ANIA_01228 ANIA_01367 ANIA_01949 ANIA_02693 ANIA_02926 ANIA_03827 ANIA_04346 ANIA_04469 ANIA_04599 ANIA_07107 ANIA_08073 ANIA_08491 ANIA_10055 ANIA_10200
6.97077e-10	52	101	2.43147	Nuclear transport	http://amigo.geneontology.org/amigo/term/GO:0051169	ANIA_00124 ANIA_00282 ANIA_00843 ANIA_00844 ANIA_00906 ANIA_00926 ANIA_01064 ANIA_01157 ANIA_01190 ANIA_01223 ANIA_01238 ANIA_01256 ANIA_01379 ANIA_02086 ANIA_02120 ANIA_02142 ANIA_02210 ANIA_02262 ANIA_02431 ANIA_03172 ANIA_03413 ANIA_03657 ANIA_03739 ANIA_03745 ANIA_04087 ANIA_04293 ANIA_04417 ANIA_04499 ANIA_05337 ANIA_05482 ANIA_05627 ANIA_05717 ANIA_05789 ANIA_05865 ANIA_05978 ANIA_06006 ANI…
6.97077e-10	52	101	2.43147	Nucleocytoplasmic transport	http://amigo.geneontology.org/amigo/term/GO:0006913	ANIA_00124 ANIA_00282 ANIA_00843 ANIA_00844 ANIA_00906 ANIA_00926 ANIA_01064 ANIA_01157 ANIA_01190 ANIA_01223 ANIA_01238 ANIA_01256 ANIA_01379 ANIA_02086 ANIA_02120 ANIA_02142 ANIA_02210 ANIA_02262 ANIA_02431 ANIA_03172 ANIA_03413 ANIA_03657 ANIA_03739 ANIA_03745 ANIA_04087 ANIA_04293 ANIA_04417 ANIA_04499 ANIA_05337 ANIA_05482 ANIA_05627 ANIA_05717 ANIA_05789 ANIA_05865 ANIA_05978 ANIA_06006 ANI…
9.27385e-10	19	21	4.27289	Endonucleolytic cleavage of tricistronic rRNA transcript (SSU-rRNA, 5.8S rRNA, LSU-rRNA)	http://amigo.geneontology.org/amigo/term/GO:0000479	ANIA_00421 ANIA_00707 ANIA_01474 ANIA_03167 ANIA_03172 ANIA_03652 ANIA_03745 ANIA_03823 ANIA_04065 ANIA_04460 ANIA_04599 ANIA_05785 ANIA_05789 ANIA_05875 ANIA_06266 ANIA_06334 ANIA_07305 ANIA_10055 ANIA_10618
1.20579e-09	574	2176	1.24578	Biosynthetic process	http://amigo.geneontology.org/amigo/term/GO:0009058	ANIA_00050 ANIA_00067 ANIA_00104 ANIA_00105 ANIA_00123 ANIA_00130 ANIA_00134 ANIA_00142 ANIA_00150 ANIA_00192 ANIA_00228 ANIA_00259 ANIA_00260 ANIA_00262 ANIA_00271 ANIA_00278 ANIA_00279 ANIA_00292 ANIA_00312 ANIA_00321 ANIA_00327 ANIA_00357 ANIA_00359 ANIA_00364 ANIA_00367 ANIA_00388 ANIA_00406 ANIA_00433 ANIA_00445 ANIA_00465 ANIA_00474 ANIA_00490 ANIA_00502 ANIA_00507 ANIA_00551 ANIA_00554 ANI…
4.01545e-09	25	34	3.47255	ATP-dependent activity, acting on RNA	http://amigo.geneontology.org/amigo/term/GO:0008186	ANIA_00204 ANIA_00228 ANIA_00583 ANIA_00589 ANIA_00637 ANIA_00894 ANIA_00944 ANIA_01750 ANIA_01949 ANIA_02932 ANIA_03176 ANIA_04233 ANIA_04412 ANIA_04903 ANIA_05931 ANIA_05992 ANIA_06070 ANIA_06085 ANIA_06149 ANIA_06374 ANIA_06707 ANIA_06895 ANIA_08016 ANIA_10125 ANIA_10417
5.22401e-09	19	22	4.07867	Ribosomal large subunit assembly	http://amigo.geneontology.org/amigo/term/GO:0000027	ANIA_00262 ANIA_01013 ANIA_01166 ANIA_02268 ANIA_02734 ANIA_04232 ANIA_04475 ANIA_04560 ANIA_06202 ANIA_06310 ANIA_06902 ANIA_08704 ANIA_08834 ANIA_08856 ANIA_10055 ANIA_10058 ANIA_10200 ANIA_10943 ANIA_10955
5.22401e-09	19	22	4.07867	SnoRNA binding	http://amigo.geneontology.org/amigo/term/GO:0030515	ANIA_00247 ANIA_00305 ANIA_00647 ANIA_00695 ANIA_01319 ANIA_01354 ANIA_03167 ANIA_04456 ANIA_04460 ANIA_05455 ANIA_06171 ANIA_06266 ANIA_06334 ANIA_08183 ANIA_08254 ANIA_09398 ANIA_10352 ANIA_10712 ANIA_10798
5.4054e-09	23	30	3.62071	Preribosome, large subunit precursor	http://amigo.geneontology.org/amigo/term/GO:0030687	ANIA_00074 ANIA_00092 ANIA_00946 ANIA_01175 ANIA_01367 ANIA_02926 ANIA_03745 ANIA_03827 ANIA_04232 ANIA_04469 ANIA_04560 ANIA_05865 ANIA_06310 ANIA_06556 ANIA_06612 ANIA_06822 ANIA_06902 ANIA_08073 ANIA_08247 ANIA_08491 ANIA_08834 ANIA_10055 ANIA_10200
9.49178e-09	16	17	4.44487	Preribosome, small subunit precursor	http://amigo.geneontology.org/amigo/term/GO:0030688	ANIA_00124 ANIA_00247 ANIA_01175 ANIA_01434 ANIA_01533 ANIA_02262 ANIA_03313 ANIA_04087 ANIA_04534 ANIA_05875 ANIA_06200 ANIA_06266 ANIA_06363 ANIA_08253 ANIA_09398 ANIA_10618
1.24167e-08	40	73	2.58776	RNA localization	http://amigo.geneontology.org/amigo/term/GO:0006403	ANIA_00124 ANIA_00282 ANIA_00420 ANIA_00448 ANIA_00559 ANIA_00753 ANIA_00843 ANIA_01157 ANIA_01190 ANIA_01379 ANIA_02086 ANIA_02693 ANIA_03172 ANIA_03413 ANIA_03657 ANIA_03739 ANIA_04000 ANIA_04087 ANIA_04293 ANIA_04317 ANIA_04417 ANIA_04499 ANIA_04617 ANIA_05337 ANIA_05627 ANIA_05717 ANIA_05889 ANIA_06143 ANIA_06507 ANIA_06556 ANIA_06651 ANIA_06738 ANIA_06978 ANIA_08038 ANIA_08254 ANIA_08787 ANI…
1.52773e-08	14	14	4.72267	Eukaryotic translation initiation factor 3 complex	http://amigo.geneontology.org/amigo/term/GO:0005852	ANIA_00359 ANIA_01256 ANIA_01270 ANIA_02743 ANIA_02907 ANIA_02997 ANIA_03055 ANIA_04259 ANIA_05745 ANIA_05954 ANIA_07105 ANIA_07540 ANIA_10182 ANIA_10765
1.52773e-08	27	40	3.1878	Ribosome biogenesis in eukaryotes	http://www.genome.jp/kegg-bin/show_pathway?ani03008	ANIA_00189 ANIA_00247 ANIA_00305 ANIA_00475 ANIA_00695 ANIA_00707 ANIA_01215 ANIA_01272 ANIA_01319 ANIA_01474 ANIA_01983 ANIA_03167 ANIA_03652 ANIA_03794 ANIA_04330 ANIA_04460 ANIA_04631 ANIA_04648 ANIA_05455 ANIA_05865 ANIA_06171 ANIA_06310 ANIA_06334 ANIA_06363 ANIA_07458 ANIA_08253 ANIA_08851
2.45916e-08	180	564	1.50723	Nuclear protein-containing complex	http://amigo.geneontology.org/amigo/term/GO:0140513	ANIA_00126 ANIA_00133 ANIA_00189 ANIA_00190 ANIA_00192 ANIA_00211 ANIA_00260 ANIA_00276 ANIA_00282 ANIA_00292 ANIA_00305 ANIA_00321 ANIA_00327 ANIA_00420 ANIA_00421 ANIA_00647 ANIA_00695 ANIA_00752 ANIA_00794 ANIA_00808 ANIA_00814 ANIA_00872 ANIA_00905 ANIA_00946 ANIA_01064 ANIA_01157 ANIA_01190 ANIA_01207 ANIA_01208 ANIA_01217 ANIA_01238 ANIA_01249 ANIA_01272 ANIA_01319 ANIA_01367 ANIA_01369 ANI…
5.34226e-08	48	99	2.28978	TRNA processing	http://amigo.geneontology.org/amigo/term/GO:0008033	ANIA_00062 ANIA_00072 ANIA_00114 ANIA_00130 ANIA_00141 ANIA_00189 ANIA_00190 ANIA_00247 ANIA_00502 ANIA_00745 ANIA_00757 ANIA_00804 ANIA_00818 ANIA_00956 ANIA_01495 ANIA_01751 ANIA_02007 ANIA_02105 ANIA_02190 ANIA_02451 ANIA_02513 ANIA_02735 ANIA_03170 ANIA_03603 ANIA_03652 ANIA_04067 ANIA_04093 ANIA_04631 ANIA_04889 ANIA_05155 ANIA_06165 ANIA_06577 ANIA_06604 ANIA_07028 ANIA_08066 ANIA_08214 ANI…
9.32451e-08	35	63	2.62371	RNA phosphodiester bond hydrolysis, endonucleolytic	http://amigo.geneontology.org/amigo/term/GO:0090502	ANIA_00189 ANIA_00190 ANIA_00421 ANIA_00707 ANIA_00997 ANIA_01474 ANIA_01723 ANIA_02185 ANIA_02457 ANIA_02847 ANIA_03167 ANIA_03172 ANIA_03652 ANIA_03657 ANIA_03745 ANIA_03823 ANIA_04065 ANIA_04460 ANIA_04599 ANIA_04631 ANIA_04958 ANIA_05040 ANIA_05114 ANIA_05408 ANIA_05785 ANIA_05789 ANIA_05875 ANIA_06266 ANIA_06334 ANIA_06822 ANIA_07305 ANIA_08253 ANIA_08794 ANIA_10055 ANIA_10618
9.32451e-08	62	144	2.03337	TRNA metabolic process	http://amigo.geneontology.org/amigo/term/GO:0006399	ANIA_00062 ANIA_00072 ANIA_00114 ANIA_00130 ANIA_00141 ANIA_00189 ANIA_00190 ANIA_00247 ANIA_00502 ANIA_00745 ANIA_00757 ANIA_00804 ANIA_00818 ANIA_00956 ANIA_01201 ANIA_01495 ANIA_01709 ANIA_01710 ANIA_01751 ANIA_02007 ANIA_02105 ANIA_02190 ANIA_02451 ANIA_02513 ANIA_02735 ANIA_03170 ANIA_03603 ANIA_03652 ANIA_03657 ANIA_03702 ANIA_04067 ANIA_04093 ANIA_04617 ANIA_04631 ANIA_04889 ANIA_05155 ANI…
9.43345e-08	132	390	1.59844	Cell cycle	http://amigo.geneontology.org/amigo/term/GO:0007049	ANIA_00055 ANIA_00118 ANIA_00228 ANIA_00276 ANIA_00279 ANIA_00316 ANIA_00414 ANIA_00420 ANIA_00676 ANIA_00715 ANIA_00807 ANIA_00808 ANIA_00848 ANIA_00872 ANIA_00905 ANIA_00995 ANIA_01182 ANIA_01207 ANIA_01222 ANIA_01223 ANIA_01286 ANIA_01359 ANIA_01392 ANIA_01394 ANIA_01399 ANIA_01560 ANIA_01660 ANIA_01661 ANIA_01674 ANIA_01708 ANIA_02054 ANIA_02059 ANIA_02128 ANIA_02137 ANIA_02160 ANIA_02491 ANI…
1.05322e-07	30	50	2.8336	Organellar ribosome	http://amigo.geneontology.org/amigo/term/GO:0000313	ANIA_00123 ANIA_00142 ANIA_01095 ANIA_01770 ANIA_01954 ANIA_02057 ANIA_02949 ANIA_03173 ANIA_03635 ANIA_03649 ANIA_03744 ANIA_04251 ANIA_04434 ANIA_04613 ANIA_04652 ANIA_05164 ANIA_05897 ANIA_06039 ANIA_06376 ANIA_06564 ANIA_06891 ANIA_06904 ANIA_07449 ANIA_07699 ANIA_07701 ANIA_08256 ANIA_08794 ANIA_10161 ANIA_10922 ANIA_11230
1.05322e-07	30	50	2.8336	Mitochondrial ribosome	http://amigo.geneontology.org/amigo/term/GO:0005761	ANIA_00123 ANIA_00142 ANIA_01095 ANIA_01770 ANIA_01954 ANIA_02057 ANIA_02949 ANIA_03173 ANIA_03635 ANIA_03649 ANIA_03744 ANIA_04251 ANIA_04434 ANIA_04613 ANIA_04652 ANIA_05164 ANIA_05897 ANIA_06039 ANIA_06376 ANIA_06564 ANIA_06891 ANIA_06904 ANIA_07449 ANIA_07699 ANIA_07701 ANIA_08256 ANIA_08794 ANIA_10161 ANIA_10922 ANIA_11230
1.06124e-07	84	218	1.81974	Mitotic cell cycle	http://amigo.geneontology.org/amigo/term/GO:0000278	ANIA_00118 ANIA_00228 ANIA_00279 ANIA_00316 ANIA_00676 ANIA_00715 ANIA_00808 ANIA_00848 ANIA_00872 ANIA_00905 ANIA_01182 ANIA_01207 ANIA_01223 ANIA_01286 ANIA_01560 ANIA_01674 ANIA_02054 ANIA_02128 ANIA_02137 ANIA_02160 ANIA_02491 ANIA_02511 ANIA_02927 ANIA_02963 ANIA_02969 ANIA_03067 ANIA_03589 ANIA_03795 ANIA_03941 ANIA_03946 ANIA_04182 ANIA_04265 ANIA_04279 ANIA_04513 ANIA_04571 ANIA_04597 ANI…
1.34473e-07	34	61	2.63231	TRNA modification	http://amigo.geneontology.org/amigo/term/GO:0006400	ANIA_00062 ANIA_00072 ANIA_00130 ANIA_00141 ANIA_00247 ANIA_00502 ANIA_00757 ANIA_00804 ANIA_00818 ANIA_00956 ANIA_01751 ANIA_02190 ANIA_02451 ANIA_02735 ANIA_03170 ANIA_03603 ANIA_04093 ANIA_04889 ANIA_05155 ANIA_06165 ANIA_06577 ANIA_06604 ANIA_07028 ANIA_08066 ANIA_08214 ANIA_08799 ANIA_09406 ANIA_10224 ANIA_10248 ANIA_10361 ANIA_10451 ANIA_10551 ANIA_10721 ANIA_10832
1.64725e-07	42	84	2.36133	Macromolecule methylation	http://amigo.geneontology.org/amigo/term/GO:0043414	ANIA_00092 ANIA_00130 ANIA_00134 ANIA_00141 ANIA_00288 ANIA_00625 ANIA_00745 ANIA_00757 ANIA_01170 ANIA_01445 ANIA_01751 ANIA_01905 ANIA_01957 ANIA_02190 ANIA_02557 ANIA_02735 ANIA_03096 ANIA_03313 ANIA_03603 ANIA_05789 ANIA_05871 ANIA_05998 ANIA_06072 ANIA_06162 ANIA_06568 ANIA_06577 ANIA_06677 ANIA_07340 ANIA_07490 ANIA_08066 ANIA_08073 ANIA_08799 ANIA_08825 ANIA_08849 ANIA_08855 ANIA_09406 ANI…
1.64725e-07	14	15	4.40782	Eukaryotic 43S preinitiation complex	http://amigo.geneontology.org/amigo/term/GO:0016282	ANIA_00359 ANIA_01270 ANIA_02743 ANIA_02907 ANIA_02997 ANIA_03055 ANIA_04259 ANIA_04470 ANIA_05745 ANIA_05954 ANIA_07105 ANIA_07540 ANIA_10182 ANIA_10765
1.64725e-07	14	15	4.40782	Eukaryotic 48S preinitiation complex	http://amigo.geneontology.org/amigo/term/GO:0033290	ANIA_00359 ANIA_01270 ANIA_02743 ANIA_02907 ANIA_02997 ANIA_03055 ANIA_04259 ANIA_04470 ANIA_05745 ANIA_05954 ANIA_07105 ANIA_07540 ANIA_10182 ANIA_10765
1.72497e-07	46	96	2.26295	RNA phosphodiester bond hydrolysis	http://amigo.geneontology.org/amigo/term/GO:0090501	ANIA_00189 ANIA_00190 ANIA_00421 ANIA_00695 ANIA_00707 ANIA_00997 ANIA_01474 ANIA_01723 ANIA_02185 ANIA_02457 ANIA_02847 ANIA_03082 ANIA_03167 ANIA_03172 ANIA_03652 ANIA_03657 ANIA_03745 ANIA_03823 ANIA_04065 ANIA_04460 ANIA_04599 ANIA_04617 ANIA_04631 ANIA_04958 ANIA_05040 ANIA_05114 ANIA_05408 ANIA_05785 ANIA_05789 ANIA_05875 ANIA_06111 ANIA_06160 ANIA_06244 ANIA_06266 ANIA_06334 ANIA_06561 ANI…
2.85153e-07	29	49	2.79505	Cell cycle	http://www.genome.jp/kegg-bin/show_pathway?ani04111	ANIA_00228 ANIA_00814 ANIA_00872 ANIA_00905 ANIA_01207 ANIA_02452 ANIA_02511 ANIA_02927 ANIA_02963 ANIA_03620 ANIA_03941 ANIA_03946 ANIA_04182 ANIA_04265 ANIA_04571 ANIA_04597 ANIA_04735 ANIA_04873 ANIA_05057 ANIA_05676 ANIA_05892 ANIA_05899 ANIA_05992 ANIA_06070 ANIA_06364 ANIA_07678 ANIA_07994 ANIA_08013 ANIA_08056
3.3623e-07	38	74	2.42515	Nuclear export	http://amigo.geneontology.org/amigo/term/GO:0051168	ANIA_00282 ANIA_00843 ANIA_00844 ANIA_01157 ANIA_01190 ANIA_01256 ANIA_01379 ANIA_02086 ANIA_02210 ANIA_02262 ANIA_03172 ANIA_03413 ANIA_03657 ANIA_03739 ANIA_03745 ANIA_04087 ANIA_04293 ANIA_04499 ANIA_05337 ANIA_05482 ANIA_05627 ANIA_05717 ANIA_05789 ANIA_05865 ANIA_06143 ANIA_06507 ANIA_06591 ANIA_06651 ANIA_06738 ANIA_06978 ANIA_07143 ANIA_08038 ANIA_08787 ANIA_09109 ANIA_10112 ANIA_10618 ANI…
3.39002e-07	173	555	1.47211	Cellular localization	http://amigo.geneontology.org/amigo/term/GO:0051641	ANIA_00118 ANIA_00124 ANIA_00261 ANIA_00268 ANIA_00282 ANIA_00316 ANIA_00357 ANIA_00417 ANIA_00420 ANIA_00559 ANIA_00747 ANIA_00753 ANIA_00834 ANIA_00843 ANIA_00844 ANIA_00846 ANIA_00848 ANIA_00901 ANIA_00906 ANIA_00922 ANIA_00926 ANIA_01064 ANIA_01099 ANIA_01154 ANIA_01157 ANIA_01177 ANIA_01182 ANIA_01190 ANIA_01223 ANIA_01238 ANIA_01256 ANIA_01272 ANIA_01282 ANIA_01379 ANIA_01394 ANIA_01454 ANI…
3.83712e-07	42	86	2.30642	Translation regulator activity	http://amigo.geneontology.org/amigo/term/GO:0045182	ANIA_00105 ANIA_00292 ANIA_00312 ANIA_00359 ANIA_00406 ANIA_00794 ANIA_00872 ANIA_01084 ANIA_01162 ANIA_01270 ANIA_02743 ANIA_02775 ANIA_02907 ANIA_02932 ANIA_02997 ANIA_03055 ANIA_03411 ANIA_03832 ANIA_04015 ANIA_04038 ANIA_04218 ANIA_04259 ANIA_04470 ANIA_04695 ANIA_04893 ANIA_05111 ANIA_05745 ANIA_05954 ANIA_06060 ANIA_06563 ANIA_06651 ANIA_06700 ANIA_07105 ANIA_07342 ANIA_07350 ANIA_07540 ANI…
4.23037e-07	24	37	3.06335	Virion component	http://amigo.geneontology.org/amigo/term/GO:0044423	ANIA_00305 ANIA_00475 ANIA_00647 ANIA_00695 ANIA_01495 ANIA_01983 ANIA_02007 ANIA_02105 ANIA_03794 ANIA_04226 ANIA_04298 ANIA_04456 ANIA_04460 ANIA_04648 ANIA_05340 ANIA_06171 ANIA_06265 ANIA_06903 ANIA_07182 ANIA_07458 ANIA_08183 ANIA_10561 ANIA_10848 ANIA_10966
4.50941e-07	21	30	3.30587	RNA helicase activity	http://amigo.geneontology.org/amigo/term/GO:0003724	ANIA_00204 ANIA_00583 ANIA_00589 ANIA_00637 ANIA_00894 ANIA_00944 ANIA_01750 ANIA_01949 ANIA_02932 ANIA_03176 ANIA_04233 ANIA_04412 ANIA_04903 ANIA_05931 ANIA_06085 ANIA_06149 ANIA_06374 ANIA_06707 ANIA_08016 ANIA_10125 ANIA_10417
4.92929e-07	37	72	2.42693	Nuclear envelope	http://amigo.geneontology.org/amigo/term/GO:0005635	ANIA_00420 ANIA_00676 ANIA_00906 ANIA_00926 ANIA_01064 ANIA_01157 ANIA_01190 ANIA_01238 ANIA_01379 ANIA_01771 ANIA_02086 ANIA_02120 ANIA_02142 ANIA_02431 ANIA_02511 ANIA_03910 ANIA_04293 ANIA_04317 ANIA_04417 ANIA_04499 ANIA_05627 ANIA_05717 ANIA_05889 ANIA_05978 ANIA_06006 ANIA_06143 ANIA_06591 ANIA_06738 ANIA_06865 ANIA_06868 ANIA_07182 ANIA_07731 ANIA_08787 ANIA_08862 ANIA_09109 ANIA_10002 ANI…
5.39948e-07	39	78	2.36133	Translation factor activity, RNA binding	http://amigo.geneontology.org/amigo/term/GO:0008135	ANIA_00105 ANIA_00292 ANIA_00312 ANIA_00359 ANIA_00794 ANIA_00872 ANIA_01084 ANIA_01162 ANIA_01270 ANIA_02743 ANIA_02775 ANIA_02907 ANIA_02932 ANIA_02997 ANIA_03055 ANIA_03411 ANIA_03832 ANIA_04015 ANIA_04038 ANIA_04218 ANIA_04259 ANIA_04470 ANIA_04695 ANIA_04893 ANIA_05745 ANIA_05954 ANIA_06060 ANIA_06563 ANIA_06651 ANIA_06700 ANIA_07105 ANIA_07342 ANIA_07350 ANIA_07540 ANIA_08066 ANIA_08191 ANI…
5.74434e-07	23	35	3.10347	Nuclear pore	http://amigo.geneontology.org/amigo/term/GO:0005643	ANIA_00420 ANIA_01064 ANIA_01157 ANIA_01190 ANIA_01238 ANIA_01379 ANIA_02086 ANIA_02142 ANIA_02431 ANIA_02511 ANIA_04293 ANIA_04317 ANIA_04417 ANIA_04499 ANIA_05627 ANIA_05889 ANIA_05978 ANIA_06143 ANIA_06738 ANIA_08787 ANIA_09109 ANIA_10002 ANIA_10112
8.17478e-07	88	241	1.72446	Carbohydrate derivative biosynthetic process	http://amigo.geneontology.org/amigo/term/GO:1901137	ANIA_00067 ANIA_00104 ANIA_00130 ANIA_00259 ANIA_00271 ANIA_00357 ANIA_00367 ANIA_00474 ANIA_00490 ANIA_00502 ANIA_00551 ANIA_00565 ANIA_00636 ANIA_00667 ANIA_00743 ANIA_00787 ANIA_01455 ANIA_01459 ANIA_01523 ANIA_01624 ANIA_01775 ANIA_01911 ANIA_01965 ANIA_02096 ANIA_02240 ANIA_02315 ANIA_02435 ANIA_02436 ANIA_03122 ANIA_03169 ANIA_03370 ANIA_03419 ANIA_03733 ANIA_03826 ANIA_03916 ANIA_04234 ANI…
8.30449e-07	39	79	2.33144	Translation regulator activity, nucleic acid binding	http://amigo.geneontology.org/amigo/term/GO:0090079	ANIA_00105 ANIA_00292 ANIA_00312 ANIA_00359 ANIA_00794 ANIA_00872 ANIA_01084 ANIA_01162 ANIA_01270 ANIA_02743 ANIA_02775 ANIA_02907 ANIA_02932 ANIA_02997 ANIA_03055 ANIA_03411 ANIA_03832 ANIA_04015 ANIA_04038 ANIA_04218 ANIA_04259 ANIA_04470 ANIA_04695 ANIA_04893 ANIA_05745 ANIA_05954 ANIA_06060 ANIA_06563 ANIA_06651 ANIA_06700 ANIA_07105 ANIA_07342 ANIA_07350 ANIA_07540 ANIA_08066 ANIA_08191 ANI…
8.47688e-07	203	681	1.40779	Purine ribonucleoside triphosphate binding	http://amigo.geneontology.org/amigo/term/GO:0035639	ANIA_00044 ANIA_00114 ANIA_00118 ANIA_00124 ANIA_00126 ANIA_00133 ANIA_00182 ANIA_00204 ANIA_00228 ANIA_00247 ANIA_00259 ANIA_00316 ANIA_00327 ANIA_00381 ANIA_00404 ANIA_00449 ANIA_00490 ANIA_00565 ANIA_00583 ANIA_00589 ANIA_00637 ANIA_00676 ANIA_00804 ANIA_00822 ANIA_00847 ANIA_00873 ANIA_00889 ANIA_00894 ANIA_00944 ANIA_01084 ANIA_01182 ANIA_01189 ANIA_01201 ANIA_01207 ANIA_01215 ANIA_01222 ANI…
9.44942e-07	14	16	4.13234	Translation preinitiation complex	http://amigo.geneontology.org/amigo/term/GO:0070993	ANIA_00359 ANIA_01270 ANIA_02743 ANIA_02907 ANIA_02997 ANIA_03055 ANIA_04259 ANIA_04470 ANIA_05745 ANIA_05954 ANIA_07105 ANIA_07540 ANIA_10182 ANIA_10765
9.94201e-07	107	311	1.62484	Cell cycle process	http://amigo.geneontology.org/amigo/term/GO:0022402	ANIA_00055 ANIA_00118 ANIA_00228 ANIA_00414 ANIA_00420 ANIA_00676 ANIA_00715 ANIA_00807 ANIA_00808 ANIA_00848 ANIA_00872 ANIA_00905 ANIA_01182 ANIA_01207 ANIA_01222 ANIA_01223 ANIA_01286 ANIA_01359 ANIA_01394 ANIA_01560 ANIA_01661 ANIA_01708 ANIA_02059 ANIA_02128 ANIA_02137 ANIA_02160 ANIA_02491 ANIA_02511 ANIA_02687 ANIA_02755 ANIA_02862 ANIA_02927 ANIA_02963 ANIA_02969 ANIA_03067 ANIA_03589 ANI…
9.94201e-07	34	65	2.47032	Nucleic acid transport	http://amigo.geneontology.org/amigo/term/GO:0050657	ANIA_00124 ANIA_00282 ANIA_00420 ANIA_00559 ANIA_00843 ANIA_01157 ANIA_01190 ANIA_01379 ANIA_02086 ANIA_03172 ANIA_03413 ANIA_03657 ANIA_03739 ANIA_04000 ANIA_04087 ANIA_04293 ANIA_04317 ANIA_04417 ANIA_04499 ANIA_05337 ANIA_05627 ANIA_05717 ANIA_05889 ANIA_06143 ANIA_06507 ANIA_06556 ANIA_06651 ANIA_06738 ANIA_06978 ANIA_08038 ANIA_08787 ANIA_09109 ANIA_10112 ANIA_11250
9.94201e-07	34	65	2.47032	RNA transport	http://amigo.geneontology.org/amigo/term/GO:0050658	ANIA_00124 ANIA_00282 ANIA_00420 ANIA_00559 ANIA_00843 ANIA_01157 ANIA_01190 ANIA_01379 ANIA_02086 ANIA_03172 ANIA_03413 ANIA_03657 ANIA_03739 ANIA_04000 ANIA_04087 ANIA_04293 ANIA_04317 ANIA_04417 ANIA_04499 ANIA_05337 ANIA_05627 ANIA_05717 ANIA_05889 ANIA_06143 ANIA_06507 ANIA_06556 ANIA_06651 ANIA_06738 ANIA_06978 ANIA_08038 ANIA_08787 ANIA_09109 ANIA_10112 ANIA_11250
9.94201e-07	34	65	2.47032	Establishment of RNA localization	http://amigo.geneontology.org/amigo/term/GO:0051236	ANIA_00124 ANIA_00282 ANIA_00420 ANIA_00559 ANIA_00843 ANIA_01157 ANIA_01190 ANIA_01379 ANIA_02086 ANIA_03172 ANIA_03413 ANIA_03657 ANIA_03739 ANIA_04000 ANIA_04087 ANIA_04293 ANIA_04317 ANIA_04417 ANIA_04499 ANIA_05337 ANIA_05627 ANIA_05717 ANIA_05889 ANIA_06143 ANIA_06507 ANIA_06556 ANIA_06651 ANIA_06738 ANIA_06978 ANIA_08038 ANIA_08787 ANIA_09109 ANIA_10112 ANIA_11250
1.04483e-06	16	20	3.77814	Structural constituent of nuclear pore	http://amigo.geneontology.org/amigo/term/GO:0017056	ANIA_01064 ANIA_01190 ANIA_01238 ANIA_02086 ANIA_02431 ANIA_04293 ANIA_04417 ANIA_04499 ANIA_05627 ANIA_05889 ANIA_05978 ANIA_06143 ANIA_06738 ANIA_09109 ANIA_10002 ANIA_10112
1.17008e-06	23	36	3.01726	Viral nucleocapsid	http://amigo.geneontology.org/amigo/term/GO:0019013	ANIA_00305 ANIA_00475 ANIA_00647 ANIA_00695 ANIA_01495 ANIA_01983 ANIA_02007 ANIA_02105 ANIA_03794 ANIA_04226 ANIA_04298 ANIA_04456 ANIA_04460 ANIA_04648 ANIA_05340 ANIA_06171 ANIA_06265 ANIA_06903 ANIA_07458 ANIA_08183 ANIA_10561 ANIA_10848 ANIA_10966
1.17008e-06	23	36	3.01726	Viral capsid	http://amigo.geneontology.org/amigo/term/GO:0019028	ANIA_00305 ANIA_00475 ANIA_00647 ANIA_00695 ANIA_01495 ANIA_01983 ANIA_02007 ANIA_02105 ANIA_03794 ANIA_04226 ANIA_04298 ANIA_04456 ANIA_04460 ANIA_04648 ANIA_05340 ANIA_06171 ANIA_06265 ANIA_06903 ANIA_07458 ANIA_08183 ANIA_10561 ANIA_10848 ANIA_10966
1.18406e-06	31	57	2.56847	Translation initiation factor activity	http://amigo.geneontology.org/amigo/term/GO:0003743	ANIA_00105 ANIA_00292 ANIA_00312 ANIA_00359 ANIA_00794 ANIA_00872 ANIA_01270 ANIA_02743 ANIA_02775 ANIA_02907 ANIA_02932 ANIA_02997 ANIA_03055 ANIA_03411 ANIA_04015 ANIA_04038 ANIA_04259 ANIA_04470 ANIA_04893 ANIA_05745 ANIA_05954 ANIA_06060 ANIA_07105 ANIA_07342 ANIA_07350 ANIA_07540 ANIA_08066 ANIA_08191 ANIA_10182 ANIA_10501 ANIA_10765
1.3354e-06	20	29	3.25701	RRNA modification	http://amigo.geneontology.org/amigo/term/GO:0000154	ANIA_00092 ANIA_00247 ANIA_00625 ANIA_00695 ANIA_00745 ANIA_01957 ANIA_03167 ANIA_03313 ANIA_05155 ANIA_05789 ANIA_05871 ANIA_08073 ANIA_08254 ANIA_08849 ANIA_08851 ANIA_08855 ANIA_10352 ANIA_10712 ANIA_10721 ANIA_10936
1.38625e-06	48	108	2.09896	Cell division	http://amigo.geneontology.org/amigo/term/GO:0051301	ANIA_00276 ANIA_00655 ANIA_00676 ANIA_00814 ANIA_00905 ANIA_00995 ANIA_01392 ANIA_01394 ANIA_01399 ANIA_01560 ANIA_02128 ANIA_02130 ANIA_02511 ANIA_02687 ANIA_02772 ANIA_02862 ANIA_02963 ANIA_03648 ANIA_03941 ANIA_04182 ANIA_04265 ANIA_04667 ANIA_04735 ANIA_04969 ANIA_05057 ANIA_05666 ANIA_05676 ANIA_05686 ANIA_05815 ANIA_05899 ANIA_06364 ANIA_06688 ANIA_06732 ANIA_07032 ANIA_07296 ANIA_07487 ANI…
1.65126e-06	24	39	2.90626	RNA methylation	http://amigo.geneontology.org/amigo/term/GO:0001510	ANIA_00092 ANIA_00130 ANIA_00141 ANIA_00625 ANIA_00745 ANIA_00757 ANIA_01751 ANIA_01957 ANIA_02190 ANIA_02735 ANIA_03313 ANIA_03603 ANIA_05789 ANIA_05871 ANIA_06577 ANIA_08066 ANIA_08073 ANIA_08799 ANIA_08849 ANIA_08855 ANIA_09406 ANIA_10361 ANIA_10451 ANIA_10721
1.82324e-06	206	700	1.38981	Purine nucleotide binding	http://amigo.geneontology.org/amigo/term/GO:0017076	ANIA_00044 ANIA_00114 ANIA_00118 ANIA_00124 ANIA_00126 ANIA_00133 ANIA_00182 ANIA_00204 ANIA_00228 ANIA_00247 ANIA_00259 ANIA_00316 ANIA_00327 ANIA_00381 ANIA_00404 ANIA_00449 ANIA_00490 ANIA_00565 ANIA_00583 ANIA_00589 ANIA_00637 ANIA_00676 ANIA_00804 ANIA_00822 ANIA_00847 ANIA_00873 ANIA_00889 ANIA_00894 ANIA_00944 ANIA_01084 ANIA_01182 ANIA_01189 ANIA_01201 ANIA_01207 ANIA_01215 ANIA_01222 ANI…
2.19913e-06	25	42	2.81111	Protein localization to nucleus	http://amigo.geneontology.org/amigo/term/GO:0034504	ANIA_00906 ANIA_00926 ANIA_01064 ANIA_01190 ANIA_01223 ANIA_01379 ANIA_02086 ANIA_02120 ANIA_02142 ANIA_02431 ANIA_03167 ANIA_04293 ANIA_04499 ANIA_05482 ANIA_05627 ANIA_05717 ANIA_06006 ANIA_06143 ANIA_06591 ANIA_06738 ANIA_07731 ANIA_09109 ANIA_10082 ANIA_10112 ANIA_10895
2.71385e-06	48	110	2.0608	Organelle assembly	http://amigo.geneontology.org/amigo/term/GO:0070925	ANIA_00262 ANIA_00421 ANIA_00676 ANIA_00715 ANIA_00843 ANIA_00848 ANIA_01013 ANIA_01166 ANIA_01382 ANIA_02128 ANIA_02268 ANIA_02734 ANIA_02862 ANIA_03172 ANIA_03706 ANIA_03745 ANIA_04060 ANIA_04232 ANIA_04475 ANIA_04560 ANIA_04652 ANIA_05057 ANIA_05115 ANIA_05960 ANIA_05979 ANIA_05997 ANIA_06202 ANIA_06310 ANIA_06340 ANIA_06554 ANIA_06632 ANIA_06865 ANIA_06902 ANIA_06978 ANIA_07305 ANIA_08183 ANI…
3.12738e-06	70	184	1.79667	Mitotic cell cycle process	http://amigo.geneontology.org/amigo/term/GO:1903047	ANIA_00228 ANIA_00676 ANIA_00715 ANIA_00808 ANIA_00848 ANIA_00872 ANIA_00905 ANIA_01182 ANIA_01207 ANIA_01223 ANIA_01286 ANIA_01560 ANIA_02128 ANIA_02137 ANIA_02160 ANIA_02491 ANIA_02511 ANIA_02927 ANIA_02963 ANIA_02969 ANIA_03067 ANIA_03589 ANIA_03795 ANIA_03941 ANIA_03946 ANIA_04182 ANIA_04265 ANIA_04279 ANIA_04513 ANIA_04571 ANIA_04597 ANIA_04735 ANIA_04969 ANIA_05057 ANIA_05115 ANIA_05133 ANI…
3.26702e-06	204	697	1.38224	Purine ribonucleotide binding	http://amigo.geneontology.org/amigo/term/GO:0032555	ANIA_00044 ANIA_00114 ANIA_00118 ANIA_00124 ANIA_00126 ANIA_00133 ANIA_00182 ANIA_00204 ANIA_00228 ANIA_00247 ANIA_00259 ANIA_00316 ANIA_00327 ANIA_00381 ANIA_00404 ANIA_00449 ANIA_00490 ANIA_00565 ANIA_00583 ANIA_00589 ANIA_00637 ANIA_00676 ANIA_00804 ANIA_00822 ANIA_00847 ANIA_00873 ANIA_00889 ANIA_00894 ANIA_00944 ANIA_01084 ANIA_01182 ANIA_01189 ANIA_01201 ANIA_01207 ANIA_01215 ANIA_01222 ANI…
3.33675e-06	22	35	2.96853	RNA methyltransferase activity	http://amigo.geneontology.org/amigo/term/GO:0008173	ANIA_00092 ANIA_00130 ANIA_00141 ANIA_00625 ANIA_00745 ANIA_00757 ANIA_01751 ANIA_01957 ANIA_02190 ANIA_02735 ANIA_03313 ANIA_03603 ANIA_05789 ANIA_05871 ANIA_08066 ANIA_08073 ANIA_08799 ANIA_08849 ANIA_08855 ANIA_09406 ANIA_10361 ANIA_10451
3.45475e-06	13	15	4.09298	Formation of cytoplasmic translation initiation complex	http://amigo.geneontology.org/amigo/term/GO:0001732	ANIA_00359 ANIA_01270 ANIA_02743 ANIA_02907 ANIA_02997 ANIA_03055 ANIA_04259 ANIA_05745 ANIA_05954 ANIA_07105 ANIA_07540 ANIA_10182 ANIA_10765
3.78387e-06	129	402	1.51548	Intracellular transport	http://amigo.geneontology.org/amigo/term/GO:0046907	ANIA_00118 ANIA_00124 ANIA_00261 ANIA_00282 ANIA_00316 ANIA_00357 ANIA_00417 ANIA_00420 ANIA_00559 ANIA_00747 ANIA_00834 ANIA_00843 ANIA_00844 ANIA_00906 ANIA_00922 ANIA_00926 ANIA_01064 ANIA_01154 ANIA_01157 ANIA_01177 ANIA_01182 ANIA_01190 ANIA_01223 ANIA_01238 ANIA_01256 ANIA_01272 ANIA_01282 ANIA_01379 ANIA_01454 ANIA_01525 ANIA_01892 ANIA_01940 ANIA_01953 ANIA_01980 ANIA_02062 ANIA_02086 ANI…
3.86801e-06	35	71	2.32808	Translational initiation	http://amigo.geneontology.org/amigo/term/GO:0006413	ANIA_00105 ANIA_00292 ANIA_00312 ANIA_00359 ANIA_00794 ANIA_00872 ANIA_01157 ANIA_01256 ANIA_01270 ANIA_02743 ANIA_02775 ANIA_02907 ANIA_02932 ANIA_02997 ANIA_03055 ANIA_03411 ANIA_03427 ANIA_04015 ANIA_04038 ANIA_04259 ANIA_04470 ANIA_04893 ANIA_05745 ANIA_05954 ANIA_06039 ANIA_06060 ANIA_07105 ANIA_07342 ANIA_07350 ANIA_07540 ANIA_08066 ANIA_08191 ANIA_10182 ANIA_10501 ANIA_10765
4.88285e-06	26	46	2.66933	Coated vesicle	http://amigo.geneontology.org/amigo/term/GO:0030135	ANIA_00261 ANIA_00922 ANIA_01154 ANIA_01177 ANIA_02738 ANIA_03026 ANIA_03080 ANIA_03122 ANIA_03720 ANIA_04165 ANIA_04317 ANIA_04446 ANIA_04463 ANIA_04547 ANIA_05972 ANIA_06080 ANIA_06257 ANIA_06307 ANIA_07016 ANIA_07302 ANIA_07679 ANIA_07741 ANIA_08194 ANIA_08795 ANIA_10313 ANIA_10724
5.40165e-06	32	63	2.39882	Ribonucleoprotein complex localization	http://amigo.geneontology.org/amigo/term/GO:0071166	ANIA_00282 ANIA_00843 ANIA_00844 ANIA_01157 ANIA_01190 ANIA_01256 ANIA_01379 ANIA_02210 ANIA_02262 ANIA_03172 ANIA_03413 ANIA_03657 ANIA_03739 ANIA_03745 ANIA_04087 ANIA_04499 ANIA_05337 ANIA_05482 ANIA_05717 ANIA_05789 ANIA_05865 ANIA_06143 ANIA_06507 ANIA_06651 ANIA_06978 ANIA_07143 ANIA_08038 ANIA_08787 ANIA_09109 ANIA_10618 ANIA_10943 ANIA_11250
5.40165e-06	32	63	2.39882	Ribonucleoprotein complex export from nucleus	http://amigo.geneontology.org/amigo/term/GO:0071426	ANIA_00282 ANIA_00843 ANIA_00844 ANIA_01157 ANIA_01190 ANIA_01256 ANIA_01379 ANIA_02210 ANIA_02262 ANIA_03172 ANIA_03413 ANIA_03657 ANIA_03739 ANIA_03745 ANIA_04087 ANIA_04499 ANIA_05337 ANIA_05482 ANIA_05717 ANIA_05789 ANIA_05865 ANIA_06143 ANIA_06507 ANIA_06651 ANIA_06978 ANIA_07143 ANIA_08038 ANIA_08787 ANIA_09109 ANIA_10618 ANIA_10943 ANIA_11250
5.62788e-06	39	84	2.19267	MRNA binding	http://amigo.geneontology.org/amigo/term/GO:0003729	ANIA_00282 ANIA_00406 ANIA_00745 ANIA_00753 ANIA_00843 ANIA_01228 ANIA_01517 ANIA_02068 ANIA_02105 ANIA_02743 ANIA_02775 ANIA_03411 ANIA_03739 ANIA_04000 ANIA_04202 ANIA_04865 ANIA_05111 ANIA_05715 ANIA_05960 ANIA_06060 ANIA_06507 ANIA_06556 ANIA_06587 ANIA_06600 ANIA_06903 ANIA_07014 ANIA_07474 ANIA_07480 ANIA_07540 ANIA_08016 ANIA_08038 ANIA_08268 ANIA_09090 ANIA_09093 ANIA_10164 ANIA_10173 ANI…
6.00974e-06	138	440	1.4812	Establishment of localization in cell	http://amigo.geneontology.org/amigo/term/GO:0051649	ANIA_00118 ANIA_00124 ANIA_00261 ANIA_00282 ANIA_00316 ANIA_00357 ANIA_00417 ANIA_00420 ANIA_00559 ANIA_00747 ANIA_00834 ANIA_00843 ANIA_00844 ANIA_00901 ANIA_00906 ANIA_00922 ANIA_00926 ANIA_01064 ANIA_01154 ANIA_01157 ANIA_01177 ANIA_01182 ANIA_01190 ANIA_01223 ANIA_01238 ANIA_01256 ANIA_01272 ANIA_01282 ANIA_01379 ANIA_01454 ANIA_01525 ANIA_01892 ANIA_01940 ANIA_01953 ANIA_01980 ANIA_02062 ANI…
6.38854e-06	22	36	2.88608	Protein import into nucleus	http://amigo.geneontology.org/amigo/term/GO:0006606	ANIA_00906 ANIA_00926 ANIA_01064 ANIA_01190 ANIA_01223 ANIA_01379 ANIA_02086 ANIA_02120 ANIA_02142 ANIA_02431 ANIA_04293 ANIA_04499 ANIA_05482 ANIA_05627 ANIA_05717 ANIA_06006 ANIA_06143 ANIA_06591 ANIA_06738 ANIA_07731 ANIA_09109 ANIA_10112
6.38854e-06	20	31	3.04688	5 -3 RNA polymerase activity	http://amigo.geneontology.org/amigo/term/GO:0034062	ANIA_00192 ANIA_00260 ANIA_00321 ANIA_00752 ANIA_01447 ANIA_02135 ANIA_02283 ANIA_02415 ANIA_02717 ANIA_02747 ANIA_03033 ANIA_03933 ANIA_06558 ANIA_07608 ANIA_07609 ANIA_08272 ANIA_09102 ANIA_09125 ANIA_10970 ANIA_11183
6.38854e-06	20	31	3.04688	RNA polymerase activity	http://amigo.geneontology.org/amigo/term/GO:0097747	ANIA_00192 ANIA_00260 ANIA_00321 ANIA_00752 ANIA_01447 ANIA_02135 ANIA_02283 ANIA_02415 ANIA_02717 ANIA_02747 ANIA_03033 ANIA_03933 ANIA_06558 ANIA_07608 ANIA_07609 ANIA_08272 ANIA_09102 ANIA_09125 ANIA_10970 ANIA_11183
7.58422e-06	59	150	1.85758	Nucleic acid phosphodiester bond hydrolysis	http://amigo.geneontology.org/amigo/term/GO:0090305	ANIA_00189 ANIA_00190 ANIA_00242 ANIA_00258 ANIA_00392 ANIA_00421 ANIA_00695 ANIA_00707 ANIA_00997 ANIA_01474 ANIA_01723 ANIA_02185 ANIA_02457 ANIA_02847 ANIA_03035 ANIA_03067 ANIA_03082 ANIA_03167 ANIA_03172 ANIA_03652 ANIA_03657 ANIA_03745 ANIA_03812 ANIA_03823 ANIA_03947 ANIA_04065 ANIA_04460 ANIA_04599 ANIA_04617 ANIA_04631 ANIA_04958 ANIA_04964 ANIA_05040 ANIA_05114 ANIA_05408 ANIA_05694 ANI…
8.70282e-06	52	127	1.93369	Microtubule cytoskeleton	http://amigo.geneontology.org/amigo/term/GO:0015630	ANIA_00118 ANIA_00316 ANIA_00420 ANIA_00676 ANIA_00926 ANIA_00995 ANIA_01099 ANIA_01182 ANIA_01394 ANIA_01454 ANIA_01560 ANIA_01953 ANIA_02128 ANIA_02773 ANIA_02862 ANIA_02927 ANIA_03062 ANIA_03124 ANIA_03185 ANIA_03589 ANIA_03721 ANIA_04182 ANIA_04417 ANIA_04513 ANIA_04596 ANIA_04664 ANIA_04667 ANIA_05057 ANIA_05403 ANIA_05531 ANIA_05575 ANIA_05666 ANIA_05815 ANIA_06125 ANIA_06340 ANIA_06616 ANI…
8.83558e-06	19	29	3.09416	DNA-directed 5 -3 RNA polymerase activity	http://amigo.geneontology.org/amigo/term/GO:0003899	ANIA_00192 ANIA_00260 ANIA_00321 ANIA_00752 ANIA_01447 ANIA_02135 ANIA_02283 ANIA_02415 ANIA_02747 ANIA_03033 ANIA_03933 ANIA_06558 ANIA_07608 ANIA_07609 ANIA_08272 ANIA_09102 ANIA_09125 ANIA_10970 ANIA_11183
1.04588e-05	41	92	2.10467	Microtubule-based process	http://amigo.geneontology.org/amigo/term/GO:0007017	ANIA_00118 ANIA_00316 ANIA_00414 ANIA_00420 ANIA_00676 ANIA_00715 ANIA_00848 ANIA_01182 ANIA_01454 ANIA_01560 ANIA_01953 ANIA_02128 ANIA_02862 ANIA_03062 ANIA_03124 ANIA_03185 ANIA_03589 ANIA_03721 ANIA_04182 ANIA_04417 ANIA_04513 ANIA_04602 ANIA_04664 ANIA_04706 ANIA_05057 ANIA_05531 ANIA_05815 ANIA_05829 ANIA_06125 ANIA_06340 ANIA_06838 ANIA_06863 ANIA_06865 ANIA_06875 ANIA_06978 ANIA_07498 ANI…
1.23441e-05	14	18	3.67319	Organellar small ribosomal subunit	http://amigo.geneontology.org/amigo/term/GO:0000314	ANIA_00142 ANIA_01954 ANIA_03173 ANIA_03744 ANIA_04251 ANIA_04434 ANIA_04613 ANIA_05164 ANIA_06039 ANIA_06564 ANIA_07449 ANIA_07699 ANIA_07701 ANIA_10161
1.23441e-05	14	18	3.67319	Mitochondrial small ribosomal subunit	http://amigo.geneontology.org/amigo/term/GO:0005763	ANIA_00142 ANIA_01954 ANIA_03173 ANIA_03744 ANIA_04251 ANIA_04434 ANIA_04613 ANIA_05164 ANIA_06039 ANIA_06564 ANIA_07449 ANIA_07699 ANIA_07701 ANIA_10161
1.27754e-05	12	14	4.048	Endonucleolytic cleavage in ITS1 to separate SSU-rRNA from 5.8S rRNA and LSU-rRNA from tricistronic rRNA transcript (SSU-rRNA, 5.8S rRNA, LSU-rRNA)	http://amigo.geneontology.org/amigo/term/GO:0000447	ANIA_00421 ANIA_03167 ANIA_03172 ANIA_03652 ANIA_03745 ANIA_03823 ANIA_04065 ANIA_05785 ANIA_05789 ANIA_05875 ANIA_07305 ANIA_10618
1.30633e-05	13	16	3.83717	Nuclear RNA surveillance	http://amigo.geneontology.org/amigo/term/GO:0071027	ANIA_00282 ANIA_00707 ANIA_02153 ANIA_03657 ANIA_03739 ANIA_03812 ANIA_04617 ANIA_05337 ANIA_06111 ANIA_06244 ANIA_08038 ANIA_10406 ANIA_11250
1.30633e-05	13	16	3.83717	Pyrimidine nucleotide metabolic process	http://amigo.geneontology.org/amigo/term/GO:0006220	ANIA_00067 ANIA_00271 ANIA_00490 ANIA_00565 ANIA_05884 ANIA_05909 ANIA_06157 ANIA_07028 ANIA_07429 ANIA_07502 ANIA_08213 ANIA_08216 ANIA_10131
1.30633e-05	13	16	3.83717	Pyrimidine nucleotide biosynthetic process	http://amigo.geneontology.org/amigo/term/GO:0006221	ANIA_00067 ANIA_00271 ANIA_00490 ANIA_00565 ANIA_05884 ANIA_05909 ANIA_06157 ANIA_07028 ANIA_07429 ANIA_07502 ANIA_08213 ANIA_08216 ANIA_10131
1.49191e-05	23	40	2.71553	Import into nucleus	http://amigo.geneontology.org/amigo/term/GO:0051170	ANIA_00124 ANIA_00906 ANIA_00926 ANIA_01064 ANIA_01190 ANIA_01223 ANIA_01379 ANIA_02086 ANIA_02120 ANIA_02142 ANIA_02431 ANIA_04293 ANIA_04499 ANIA_05482 ANIA_05627 ANIA_05717 ANIA_06006 ANIA_06143 ANIA_06591 ANIA_06738 ANIA_07731 ANIA_09109 ANIA_10112
1.60833e-05	17	25	3.21142	RRNA-containing ribonucleoprotein complex export from nucleus	http://amigo.geneontology.org/amigo/term/GO:0071428	ANIA_00843 ANIA_00844 ANIA_01256 ANIA_02210 ANIA_02262 ANIA_03172 ANIA_03413 ANIA_03745 ANIA_04087 ANIA_05482 ANIA_05789 ANIA_05865 ANIA_06143 ANIA_06978 ANIA_07143 ANIA_10618 ANIA_10943
1.81835e-05	19	30	2.99102	RNA secondary structure unwinding	http://amigo.geneontology.org/amigo/term/GO:0010501	ANIA_00204 ANIA_00583 ANIA_00589 ANIA_00637 ANIA_00894 ANIA_00944 ANIA_01750 ANIA_01949 ANIA_02932 ANIA_03176 ANIA_04233 ANIA_04903 ANIA_05931 ANIA_06149 ANIA_06374 ANIA_06707 ANIA_08016 ANIA_10125 ANIA_10417
1.9877e-05	41	94	2.05989	S-adenosylmethionine-dependent methyltransferase activity	http://amigo.geneontology.org/amigo/term/GO:0008757	ANIA_00092 ANIA_00130 ANIA_00134 ANIA_00141 ANIA_00288 ANIA_00625 ANIA_00745 ANIA_00757 ANIA_00761 ANIA_01170 ANIA_01445 ANIA_01957 ANIA_02190 ANIA_02557 ANIA_02735 ANIA_03096 ANIA_03313 ANIA_03603 ANIA_05688 ANIA_05789 ANIA_05871 ANIA_05914 ANIA_05998 ANIA_06072 ANIA_06162 ANIA_06568 ANIA_07146 ANIA_07340 ANIA_07490 ANIA_08066 ANIA_08073 ANIA_08799 ANIA_08825 ANIA_08849 ANIA_08855 ANIA_09406 ANI…
2.57221e-05	61	162	1.77829	Methylation	http://amigo.geneontology.org/amigo/term/GO:0032259	ANIA_00092 ANIA_00130 ANIA_00134 ANIA_00141 ANIA_00288 ANIA_00625 ANIA_00745 ANIA_00757 ANIA_00761 ANIA_00807 ANIA_01170 ANIA_01445 ANIA_01751 ANIA_01905 ANIA_01957 ANIA_02190 ANIA_02547 ANIA_02557 ANIA_02609 ANIA_02735 ANIA_03096 ANIA_03313 ANIA_03537 ANIA_03603 ANIA_04008 ANIA_04443 ANIA_04587 ANIA_04613 ANIA_05415 ANIA_05688 ANIA_05789 ANIA_05871 ANIA_05914 ANIA_05998 ANIA_06072 ANIA_06162 ANI…
2.57221e-05	18	28	3.036	Cytoplasmic translational initiation	http://amigo.geneontology.org/amigo/term/GO:0002183	ANIA_00359 ANIA_01270 ANIA_02743 ANIA_02907 ANIA_02932 ANIA_02997 ANIA_03055 ANIA_03411 ANIA_03427 ANIA_04259 ANIA_04470 ANIA_05745 ANIA_05954 ANIA_07105 ANIA_07350 ANIA_07540 ANIA_10182 ANIA_10765
3.11673e-05	39	89	2.06948	Helicase activity	http://amigo.geneontology.org/amigo/term/GO:0004386	ANIA_00044 ANIA_00133 ANIA_00204 ANIA_00228 ANIA_00327 ANIA_00583 ANIA_00589 ANIA_00637 ANIA_00872 ANIA_00894 ANIA_00944 ANIA_01750 ANIA_01949 ANIA_02138 ANIA_02491 ANIA_02932 ANIA_02973 ANIA_03176 ANIA_04233 ANIA_04412 ANIA_04903 ANIA_05931 ANIA_05992 ANIA_06070 ANIA_06085 ANIA_06149 ANIA_06374 ANIA_06585 ANIA_06707 ANIA_06895 ANIA_07014 ANIA_07538 ANIA_07652 ANIA_07994 ANIA_08016 ANIA_09077 ANI…
3.11673e-05	207	731	1.33734	Ribonucleotide binding	http://amigo.geneontology.org/amigo/term/GO:0032553	ANIA_00044 ANIA_00114 ANIA_00118 ANIA_00124 ANIA_00126 ANIA_00133 ANIA_00182 ANIA_00204 ANIA_00228 ANIA_00247 ANIA_00259 ANIA_00316 ANIA_00327 ANIA_00381 ANIA_00404 ANIA_00449 ANIA_00490 ANIA_00502 ANIA_00565 ANIA_00583 ANIA_00589 ANIA_00637 ANIA_00676 ANIA_00804 ANIA_00822 ANIA_00847 ANIA_00873 ANIA_00889 ANIA_00894 ANIA_00944 ANIA_01084 ANIA_01182 ANIA_01189 ANIA_01201 ANIA_01207 ANIA_01215 ANI…
3.18543e-05	43	102	1.99093	Posttranscriptional regulation of gene expression	http://amigo.geneontology.org/amigo/term/GO:0010608	ANIA_00282 ANIA_00406 ANIA_00974 ANIA_00997 ANIA_01157 ANIA_01256 ANIA_02717 ANIA_02775 ANIA_03055 ANIA_03411 ANIA_03413 ANIA_03739 ANIA_04000 ANIA_04015 ANIA_04163 ANIA_04202 ANIA_04470 ANIA_04617 ANIA_04695 ANIA_04803 ANIA_05111 ANIA_05164 ANIA_05408 ANIA_06111 ANIA_06244 ANIA_06507 ANIA_06540 ANIA_06587 ANIA_06651 ANIA_07474 ANIA_07492 ANIA_07554 ANIA_08038 ANIA_09090 ANIA_09093 ANIA_10164 ANI…
3.18543e-05	21	36	2.75489	Movement of cell or subcellular component	http://amigo.geneontology.org/amigo/term/GO:0006928	ANIA_00118 ANIA_00316 ANIA_00420 ANIA_01182 ANIA_01454 ANIA_01953 ANIA_03124 ANIA_03185 ANIA_03721 ANIA_04513 ANIA_04664 ANIA_04706 ANIA_05829 ANIA_06125 ANIA_06340 ANIA_06863 ANIA_06875 ANIA_07570 ANIA_08286 ANIA_08862 ANIA_10627
3.18543e-05	21	36	2.75489	Microtubule-based movement	http://amigo.geneontology.org/amigo/term/GO:0007018	ANIA_00118 ANIA_00316 ANIA_00420 ANIA_01182 ANIA_01454 ANIA_01953 ANIA_03124 ANIA_03185 ANIA_03721 ANIA_04513 ANIA_04664 ANIA_04706 ANIA_05829 ANIA_06125 ANIA_06340 ANIA_06863 ANIA_06875 ANIA_07570 ANIA_08286 ANIA_08862 ANIA_10627
3.49651e-05	79	228	1.63636	Pyrophosphatase activity	http://amigo.geneontology.org/amigo/term/GO:0016462	ANIA_00118 ANIA_00126 ANIA_00182 ANIA_00193 ANIA_00271 ANIA_00316 ANIA_00395 ANIA_00404 ANIA_00449 ANIA_00676 ANIA_00848 ANIA_00889 ANIA_01084 ANIA_01182 ANIA_01202 ANIA_01215 ANIA_01223 ANIA_01256 ANIA_01322 ANIA_01366 ANIA_01394 ANIA_01408 ANIA_01523 ANIA_01564 ANIA_01624 ANIA_01628 ANIA_01666 ANIA_02062 ANIA_02210 ANIA_02315 ANIA_02687 ANIA_02968 ANIA_03124 ANIA_03171 ANIA_03721 ANIA_03832 ANI…
3.91987e-05	10	11	4.29334	RRNA 3 -end processing	http://amigo.geneontology.org/amigo/term/GO:0031125	ANIA_02153 ANIA_03172 ANIA_03657 ANIA_03812 ANIA_03823 ANIA_04617 ANIA_06111 ANIA_06244 ANIA_10406 ANIA_11250
3.91987e-05	10	11	4.29334	RNA polymerase I complex	http://amigo.geneontology.org/amigo/term/GO:0005736	ANIA_00192 ANIA_00752 ANIA_02283 ANIA_02415 ANIA_02747 ANIA_03933 ANIA_06558 ANIA_09102 ANIA_10970 ANIA_11183
3.96563e-05	33	71	2.19504	Protein-containing complex localization	http://amigo.geneontology.org/amigo/term/GO:0031503	ANIA_00282 ANIA_00843 ANIA_00844 ANIA_01157 ANIA_01190 ANIA_01256 ANIA_01379 ANIA_02210 ANIA_02262 ANIA_03172 ANIA_03413 ANIA_03657 ANIA_03739 ANIA_03745 ANIA_04087 ANIA_04499 ANIA_05337 ANIA_05482 ANIA_05717 ANIA_05789 ANIA_05865 ANIA_05889 ANIA_06143 ANIA_06507 ANIA_06651 ANIA_06978 ANIA_07143 ANIA_08038 ANIA_08787 ANIA_09109 ANIA_10618 ANIA_10943 ANIA_11250
4.05876e-05	13	17	3.61145	RNA surveillance	http://amigo.geneontology.org/amigo/term/GO:0071025	ANIA_00282 ANIA_00707 ANIA_02153 ANIA_03657 ANIA_03739 ANIA_03812 ANIA_04617 ANIA_05337 ANIA_06111 ANIA_06244 ANIA_08038 ANIA_10406 ANIA_11250
4.05876e-05	13	17	3.61145	RNA polymerase III complex	http://amigo.geneontology.org/amigo/term/GO:0005666	ANIA_00192 ANIA_00321 ANIA_00752 ANIA_01447 ANIA_02135 ANIA_02415 ANIA_02747 ANIA_03166 ANIA_06558 ANIA_07608 ANIA_08272 ANIA_09125 ANIA_11183
4.54535e-05	42	100	1.98352	Nucleobase-containing compound transport	http://amigo.geneontology.org/amigo/term/GO:0015931	ANIA_00124 ANIA_00282 ANIA_00346 ANIA_00420 ANIA_00559 ANIA_00843 ANIA_01157 ANIA_01190 ANIA_01379 ANIA_02086 ANIA_03172 ANIA_03413 ANIA_03657 ANIA_03739 ANIA_04000 ANIA_04064 ANIA_04068 ANIA_04087 ANIA_04250 ANIA_04293 ANIA_04317 ANIA_04417 ANIA_04499 ANIA_04836 ANIA_05337 ANIA_05493 ANIA_05627 ANIA_05717 ANIA_05889 ANIA_06143 ANIA_06507 ANIA_06556 ANIA_06651 ANIA_06738 ANIA_06978 ANIA_08038 ANI…
4.54535e-05	12	15	3.77814	Nuclear mRNA surveillance	http://amigo.geneontology.org/amigo/term/GO:0071028	ANIA_00282 ANIA_00707 ANIA_02153 ANIA_03657 ANIA_03739 ANIA_03812 ANIA_04617 ANIA_05337 ANIA_06111 ANIA_06244 ANIA_08038 ANIA_10406
4.57226e-05	11	13	3.9961	Ribosomal small subunit assembly	http://amigo.geneontology.org/amigo/term/GO:0000028	ANIA_00421 ANIA_00843 ANIA_03172 ANIA_03706 ANIA_04060 ANIA_05960 ANIA_05979 ANIA_05997 ANIA_06632 ANIA_07305 ANIA_08183
5.67289e-05	46	114	1.90564	Chromosome segregation	http://amigo.geneontology.org/amigo/term/GO:0007059	ANIA_00276 ANIA_00676 ANIA_00707 ANIA_00848 ANIA_00905 ANIA_01182 ANIA_01223 ANIA_01286 ANIA_01399 ANIA_01560 ANIA_01977 ANIA_02128 ANIA_02160 ANIA_02511 ANIA_02927 ANIA_02963 ANIA_03910 ANIA_03946 ANIA_04265 ANIA_04513 ANIA_04597 ANIA_04735 ANIA_04752 ANIA_04969 ANIA_05057 ANIA_05102 ANIA_05115 ANIA_05133 ANIA_05221 ANIA_05406 ANIA_05495 ANIA_05899 ANIA_06125 ANIA_06160 ANIA_06364 ANIA_06517 ANI…
5.96016e-05	214	767	1.31767	Carbohydrate derivative binding	http://amigo.geneontology.org/amigo/term/GO:0097367	ANIA_00044 ANIA_00114 ANIA_00118 ANIA_00124 ANIA_00126 ANIA_00133 ANIA_00182 ANIA_00204 ANIA_00221 ANIA_00228 ANIA_00247 ANIA_00259 ANIA_00316 ANIA_00321 ANIA_00327 ANIA_00381 ANIA_00404 ANIA_00449 ANIA_00490 ANIA_00502 ANIA_00549 ANIA_00565 ANIA_00583 ANIA_00589 ANIA_00637 ANIA_00676 ANIA_00804 ANIA_00822 ANIA_00847 ANIA_00873 ANIA_00889 ANIA_00894 ANIA_00944 ANIA_01084 ANIA_01182 ANIA_01189 ANI…
6.19861e-05	80	235	1.60772	Hydrolase activity, acting on acid anhydrides, in phosphorus-containing anhydrides	http://amigo.geneontology.org/amigo/term/GO:0016818	ANIA_00044 ANIA_00118 ANIA_00126 ANIA_00182 ANIA_00193 ANIA_00271 ANIA_00316 ANIA_00395 ANIA_00404 ANIA_00449 ANIA_00676 ANIA_00848 ANIA_00889 ANIA_01084 ANIA_01182 ANIA_01202 ANIA_01215 ANIA_01223 ANIA_01256 ANIA_01322 ANIA_01366 ANIA_01394 ANIA_01408 ANIA_01523 ANIA_01564 ANIA_01624 ANIA_01628 ANIA_01666 ANIA_02062 ANIA_02210 ANIA_02315 ANIA_02687 ANIA_02968 ANIA_03124 ANIA_03171 ANIA_03721 ANI…
6.19861e-05	71	202	1.65995	Nucleoside-triphosphatase activity	http://amigo.geneontology.org/amigo/term/GO:0017111	ANIA_00118 ANIA_00126 ANIA_00182 ANIA_00316 ANIA_00404 ANIA_00449 ANIA_00676 ANIA_00848 ANIA_00889 ANIA_01084 ANIA_01182 ANIA_01215 ANIA_01223 ANIA_01256 ANIA_01322 ANIA_01366 ANIA_01394 ANIA_01408 ANIA_01523 ANIA_01564 ANIA_01624 ANIA_01628 ANIA_01666 ANIA_02062 ANIA_02210 ANIA_02315 ANIA_02687 ANIA_03124 ANIA_03171 ANIA_03721 ANIA_03832 ANIA_03952 ANIA_04038 ANIA_04218 ANIA_04470 ANIA_04513 ANI…
6.36146e-05	15	22	3.22	NcRNA 3 -end processing	http://amigo.geneontology.org/amigo/term/GO:0043628	ANIA_00745 ANIA_02153 ANIA_03172 ANIA_03657 ANIA_03812 ANIA_03823 ANIA_04617 ANIA_05694 ANIA_06111 ANIA_06244 ANIA_08276 ANIA_08851 ANIA_10406 ANIA_11066 ANIA_11250
7.08046e-05	17	27	2.97353	Transcription by RNA polymerase I	http://amigo.geneontology.org/amigo/term/GO:0006360	ANIA_00192 ANIA_00312 ANIA_00752 ANIA_01272 ANIA_02283 ANIA_02415 ANIA_03933 ANIA_04600 ANIA_04648 ANIA_05455 ANIA_06085 ANIA_06706 ANIA_08079 ANIA_09102 ANIA_10501 ANIA_10970 ANIA_11183
7.17618e-05	23	43	2.52608	Meiosis	http://www.genome.jp/kegg-bin/show_pathway?ani04113	ANIA_00228 ANIA_00814 ANIA_00872 ANIA_00905 ANIA_01207 ANIA_02452 ANIA_02511 ANIA_02963 ANIA_03620 ANIA_03946 ANIA_04182 ANIA_04735 ANIA_05057 ANIA_05676 ANIA_05836 ANIA_05892 ANIA_05992 ANIA_06015 ANIA_06070 ANIA_06243 ANIA_06364 ANIA_07994 ANIA_08013
8.33126e-05	25	49	2.40953	Mitochondrial gene expression	http://amigo.geneontology.org/amigo/term/GO:0140053	ANIA_00123 ANIA_01084 ANIA_01954 ANIA_02057 ANIA_03173 ANIA_03603 ANIA_03649 ANIA_03832 ANIA_03894 ANIA_04954 ANIA_05897 ANIA_06039 ANIA_06376 ANIA_06526 ANIA_06540 ANIA_06577 ANIA_06904 ANIA_07449 ANIA_07609 ANIA_07699 ANIA_07701 ANIA_08653 ANIA_08794 ANIA_10353 ANIA_10361
9.14301e-05	8	8	4.72267	Chaperonin-containing T-complex	http://amigo.geneontology.org/amigo/term/GO:0005832	ANIA_00381 ANIA_01851 ANIA_01904 ANIA_02149 ANIA_02918 ANIA_03070 ANIA_03134 ANIA_05713
0.000104433	80	238	1.58745	Hydrolase activity, acting on acid anhydrides	http://amigo.geneontology.org/amigo/term/GO:0016817	ANIA_00044 ANIA_00118 ANIA_00126 ANIA_00182 ANIA_00193 ANIA_00271 ANIA_00316 ANIA_00395 ANIA_00404 ANIA_00449 ANIA_00676 ANIA_00848 ANIA_00889 ANIA_01084 ANIA_01182 ANIA_01202 ANIA_01215 ANIA_01223 ANIA_01256 ANIA_01322 ANIA_01366 ANIA_01394 ANIA_01408 ANIA_01523 ANIA_01564 ANIA_01624 ANIA_01628 ANIA_01666 ANIA_02062 ANIA_02210 ANIA_02315 ANIA_02687 ANIA_02968 ANIA_03124 ANIA_03171 ANIA_03721 ANI…
0.000137659	12	16	3.542	RNA 5 -end processing	http://amigo.geneontology.org/amigo/term/GO:0000966	ANIA_00189 ANIA_00421 ANIA_00804 ANIA_03167 ANIA_03652 ANIA_04460 ANIA_05785 ANIA_06334 ANIA_06540 ANIA_07305 ANIA_10055 ANIA_10618
0.00015249	9	10	4.2504	Nuclear localization sequence binding	http://amigo.geneontology.org/amigo/term/GO:0008139	ANIA_00906 ANIA_00926 ANIA_02086 ANIA_02120 ANIA_02142 ANIA_02431 ANIA_05627 ANIA_05717 ANIA_07731
0.00015249	9	10	4.2504	Pyrimidine nucleoside monophosphate metabolic process	http://amigo.geneontology.org/amigo/term/GO:0009129	ANIA_00271 ANIA_00565 ANIA_05884 ANIA_05909 ANIA_06157 ANIA_07028 ANIA_07429 ANIA_07502 ANIA_10131
0.00015249	9	10	4.2504	Pyrimidine nucleoside monophosphate biosynthetic process	http://amigo.geneontology.org/amigo/term/GO:0009130	ANIA_00271 ANIA_00565 ANIA_05884 ANIA_05909 ANIA_06157 ANIA_07028 ANIA_07429 ANIA_07502 ANIA_10131
0.000196314	14	21	3.14845	TRNA methylation	http://amigo.geneontology.org/amigo/term/GO:0030488	ANIA_00130 ANIA_00141 ANIA_00757 ANIA_01751 ANIA_02190 ANIA_02735 ANIA_03603 ANIA_06577 ANIA_08066 ANIA_08799 ANIA_09406 ANIA_10361 ANIA_10451 ANIA_10721
0.000196314	14	21	3.14845	Vesicle coat	http://amigo.geneontology.org/amigo/term/GO:0030120	ANIA_00261 ANIA_00922 ANIA_01177 ANIA_03026 ANIA_03080 ANIA_03720 ANIA_04317 ANIA_04463 ANIA_04547 ANIA_05972 ANIA_06080 ANIA_06257 ANIA_07016 ANIA_07741
0.000201314	26	54	2.27388	RNA export from nucleus	http://amigo.geneontology.org/amigo/term/GO:0006405	ANIA_00282 ANIA_00843 ANIA_01157 ANIA_01190 ANIA_01379 ANIA_02086 ANIA_03172 ANIA_03413 ANIA_03657 ANIA_03739 ANIA_04087 ANIA_04293 ANIA_04499 ANIA_05337 ANIA_05627 ANIA_05717 ANIA_06143 ANIA_06507 ANIA_06651 ANIA_06738 ANIA_06978 ANIA_08038 ANIA_08787 ANIA_09109 ANIA_10112 ANIA_11250
0.000221636	109	354	1.45416	Endoplasmic reticulum	http://amigo.geneontology.org/amigo/term/GO:0005783	ANIA_00104 ANIA_00248 ANIA_00261 ANIA_00417 ANIA_00502 ANIA_00551 ANIA_00636 ANIA_00743 ANIA_00753 ANIA_00787 ANIA_00834 ANIA_00847 ANIA_00851 ANIA_01154 ANIA_01165 ANIA_01382 ANIA_01455 ANIA_01459 ANIA_01525 ANIA_01771 ANIA_01775 ANIA_02062 ANIA_02096 ANIA_02140 ANIA_02240 ANIA_02464 ANIA_02738 ANIA_03080 ANIA_03370 ANIA_03463 ANIA_03592 ANIA_03720 ANIA_03733 ANIA_03817 ANIA_03826 ANIA_03833 ANI…
0.000232233	32	73	2.07021	Establishment of organelle localization	http://amigo.geneontology.org/amigo/term/GO:0051656	ANIA_00118 ANIA_00316 ANIA_00420 ANIA_00844 ANIA_01182 ANIA_01256 ANIA_01454 ANIA_01953 ANIA_02210 ANIA_02262 ANIA_03062 ANIA_03589 ANIA_03745 ANIA_03910 ANIA_04087 ANIA_04664 ANIA_04969 ANIA_05115 ANIA_05482 ANIA_05789 ANIA_05829 ANIA_05865 ANIA_06125 ANIA_06143 ANIA_06865 ANIA_06978 ANIA_07143 ANIA_07570 ANIA_08862 ANIA_10618 ANIA_10627 ANIA_10943
0.000232233	32	73	2.07021	Protein folding	http://amigo.geneontology.org/amigo/term/GO:0006457	ANIA_00248 ANIA_00380 ANIA_00381 ANIA_00862 ANIA_01205 ANIA_01282 ANIA_01851 ANIA_01904 ANIA_02062 ANIA_02149 ANIA_02918 ANIA_03070 ANIA_03134 ANIA_03463 ANIA_03592 ANIA_03598 ANIA_04467 ANIA_04602 ANIA_04616 ANIA_04623 ANIA_04728 ANIA_05438 ANIA_05531 ANIA_05713 ANIA_05970 ANIA_06170 ANIA_06248 ANIA_06736 ANIA_07143 ANIA_07436 ANIA_08343 ANIA_08631
0.000232233	163	571	1.34815	ATP binding	http://amigo.geneontology.org/amigo/term/GO:0005524	ANIA_00044 ANIA_00114 ANIA_00118 ANIA_00124 ANIA_00126 ANIA_00133 ANIA_00204 ANIA_00228 ANIA_00247 ANIA_00259 ANIA_00327 ANIA_00381 ANIA_00404 ANIA_00490 ANIA_00565 ANIA_00583 ANIA_00589 ANIA_00637 ANIA_00822 ANIA_00847 ANIA_00873 ANIA_00894 ANIA_00944 ANIA_01189 ANIA_01201 ANIA_01207 ANIA_01222 ANIA_01256 ANIA_01366 ANIA_01523 ANIA_01560 ANIA_01564 ANIA_01628 ANIA_01708 ANIA_01709 ANIA_01710 ANI…
0.000259382	17	29	2.76846	DNA replication initiation	http://amigo.geneontology.org/amigo/term/GO:0006270	ANIA_00228 ANIA_00872 ANIA_01207 ANIA_02491 ANIA_03067 ANIA_04771 ANIA_04959 ANIA_05676 ANIA_05892 ANIA_05992 ANIA_06070 ANIA_06896 ANIA_07994 ANIA_10434 ANIA_10497 ANIA_10755 ANIA_10855
0.000277588	34	80	2.00713	Regulation of translation	http://amigo.geneontology.org/amigo/term/GO:0006417	ANIA_00406 ANIA_00974 ANIA_01157 ANIA_01256 ANIA_02775 ANIA_03055 ANIA_03411 ANIA_03413 ANIA_04000 ANIA_04015 ANIA_04163 ANIA_04202 ANIA_04470 ANIA_04617 ANIA_04695 ANIA_04803 ANIA_05111 ANIA_05164 ANIA_06111 ANIA_06244 ANIA_06587 ANIA_06651 ANIA_07474 ANIA_07492 ANIA_07554 ANIA_09090 ANIA_09093 ANIA_10173 ANIA_10182 ANIA_10224 ANIA_10248 ANIA_10315 ANIA_10406 ANIA_10417
0.000293705	47	124	1.79004	Mitochondrial matrix	http://amigo.geneontology.org/amigo/term/GO:0005759	ANIA_00123 ANIA_00142 ANIA_00259 ANIA_00747 ANIA_01095 ANIA_01733 ANIA_01770 ANIA_01954 ANIA_02057 ANIA_02295 ANIA_02949 ANIA_03173 ANIA_03313 ANIA_03635 ANIA_03649 ANIA_03744 ANIA_04251 ANIA_04434 ANIA_04613 ANIA_04652 ANIA_04977 ANIA_05162 ANIA_05164 ANIA_05753 ANIA_05897 ANIA_06039 ANIA_06248 ANIA_06376 ANIA_06564 ANIA_06708 ANIA_06891 ANIA_06904 ANIA_07449 ANIA_07699 ANIA_07701 ANIA_07878 ANI…
0.000303867	120	400	1.4168	Protein-containing complex subunit organization	http://amigo.geneontology.org/amigo/term/GO:0043933	ANIA_00133 ANIA_00228 ANIA_00262 ANIA_00316 ANIA_00327 ANIA_00359 ANIA_00421 ANIA_00448 ANIA_00559 ANIA_00676 ANIA_00728 ANIA_00794 ANIA_00843 ANIA_00872 ANIA_00906 ANIA_01013 ANIA_01064 ANIA_01157 ANIA_01166 ANIA_01182 ANIA_01256 ANIA_01270 ANIA_01286 ANIA_01322 ANIA_01382 ANIA_01495 ANIA_01635 ANIA_02007 ANIA_02105 ANIA_02268 ANIA_02283 ANIA_02491 ANIA_02693 ANIA_02734 ANIA_02743 ANIA_02850 ANI…
0.000347333	94	299	1.48472	ATP-dependent activity	http://amigo.geneontology.org/amigo/term/GO:0140657	ANIA_00044 ANIA_00118 ANIA_00126 ANIA_00133 ANIA_00204 ANIA_00228 ANIA_00327 ANIA_00404 ANIA_00559 ANIA_00583 ANIA_00589 ANIA_00637 ANIA_00872 ANIA_00894 ANIA_00944 ANIA_01189 ANIA_01256 ANIA_01366 ANIA_01523 ANIA_01564 ANIA_01624 ANIA_01628 ANIA_01708 ANIA_01750 ANIA_01949 ANIA_02062 ANIA_02138 ANIA_02160 ANIA_02210 ANIA_02315 ANIA_02491 ANIA_02545 ANIA_02932 ANIA_02969 ANIA_02973 ANIA_03124 ANI…
0.000349391	12	17	3.33365	TRNA methyltransferase activity	http://amigo.geneontology.org/amigo/term/GO:0008175	ANIA_00130 ANIA_00141 ANIA_00757 ANIA_01751 ANIA_02190 ANIA_02735 ANIA_03603 ANIA_08066 ANIA_08799 ANIA_09406 ANIA_10361 ANIA_10451
0.000354734	19	35	2.56373	Pyrimidine-containing compound metabolic process	http://amigo.geneontology.org/amigo/term/GO:0072527	ANIA_00067 ANIA_00271 ANIA_00474 ANIA_00490 ANIA_00565 ANIA_01823 ANIA_03591 ANIA_05884 ANIA_05909 ANIA_06157 ANIA_07028 ANIA_07429 ANIA_07502 ANIA_08213 ANIA_08216 ANIA_08418 ANIA_10131 ANIA_10472 ANIA_10762
0.000376779	16	27	2.79862	Pyrimidine-containing compound biosynthetic process	http://amigo.geneontology.org/amigo/term/GO:0072528	ANIA_00067 ANIA_00271 ANIA_00474 ANIA_00490 ANIA_00565 ANIA_05884 ANIA_05909 ANIA_06157 ANIA_07028 ANIA_07429 ANIA_07502 ANIA_08213 ANIA_08216 ANIA_10131 ANIA_10472 ANIA_10762
0.000380672	68	201	1.59772	Cytoskeleton	http://amigo.geneontology.org/amigo/term/GO:0005856	ANIA_00118 ANIA_00316 ANIA_00420 ANIA_00676 ANIA_00926 ANIA_00995 ANIA_01099 ANIA_01156 ANIA_01182 ANIA_01394 ANIA_01454 ANIA_01560 ANIA_01953 ANIA_02128 ANIA_02687 ANIA_02773 ANIA_02862 ANIA_02927 ANIA_03062 ANIA_03124 ANIA_03171 ANIA_03185 ANIA_03589 ANIA_03721 ANIA_04182 ANIA_04417 ANIA_04463 ANIA_04513 ANIA_04596 ANIA_04664 ANIA_04667 ANIA_04706 ANIA_04743 ANIA_05007 ANIA_05057 ANIA_05403 ANI…
0.000380742	7	7	4.72267	Polyadenylation-dependent RNA catabolic process	http://amigo.geneontology.org/amigo/term/GO:0043633	ANIA_00707 ANIA_03657 ANIA_04617 ANIA_06111 ANIA_06244 ANIA_10406 ANIA_11250
0.000380742	7	7	4.72267	Polyadenylation-dependent ncRNA catabolic process	http://amigo.geneontology.org/amigo/term/GO:0043634	ANIA_00707 ANIA_03657 ANIA_04617 ANIA_06111 ANIA_06244 ANIA_10406 ANIA_11250
0.000380742	7	7	4.72267	Nuclear ncRNA surveillance	http://amigo.geneontology.org/amigo/term/GO:0071029	ANIA_00707 ANIA_03657 ANIA_04617 ANIA_06111 ANIA_06244 ANIA_10406 ANIA_11250
0.000380742	7	7	4.72267	Nuclear polyadenylation-dependent rRNA catabolic process	http://amigo.geneontology.org/amigo/term/GO:0071035	ANIA_00707 ANIA_03657 ANIA_04617 ANIA_06111 ANIA_06244 ANIA_10406 ANIA_11250
0.000380742	7	7	4.72267	Nuclear polyadenylation-dependent ncRNA catabolic process	http://amigo.geneontology.org/amigo/term/GO:0071046	ANIA_00707 ANIA_03657 ANIA_04617 ANIA_06111 ANIA_06244 ANIA_10406 ANIA_11250
0.000380742	7	7	4.72267	Exonucleolytic trimming involved in rRNA processing	http://amigo.geneontology.org/amigo/term/GO:0000459	ANIA_03657 ANIA_04617 ANIA_06111 ANIA_06244 ANIA_10055 ANIA_10406 ANIA_11250
0.000392241	14	22	3.00533	Ribosome localization	http://amigo.geneontology.org/amigo/term/GO:0033750	ANIA_00844 ANIA_01256 ANIA_02210 ANIA_02262 ANIA_03745 ANIA_04087 ANIA_05482 ANIA_05789 ANIA_05865 ANIA_06143 ANIA_06978 ANIA_07143 ANIA_10618 ANIA_10943
0.000392241	14	22	3.00533	Ribosomal subunit export from nucleus	http://amigo.geneontology.org/amigo/term/GO:0000054	ANIA_00844 ANIA_01256 ANIA_02210 ANIA_02262 ANIA_03745 ANIA_04087 ANIA_05482 ANIA_05789 ANIA_05865 ANIA_06143 ANIA_06978 ANIA_07143 ANIA_10618 ANIA_10943
0.000402615	36	88	1.932	GTPase activity	http://amigo.geneontology.org/amigo/term/GO:0003924	ANIA_00182 ANIA_00316 ANIA_00449 ANIA_00676 ANIA_00848 ANIA_00889 ANIA_01084 ANIA_01182 ANIA_01215 ANIA_01223 ANIA_01322 ANIA_01394 ANIA_01408 ANIA_01666 ANIA_02687 ANIA_03171 ANIA_03832 ANIA_04038 ANIA_04218 ANIA_04470 ANIA_04667 ANIA_04685 ANIA_04708 ANIA_04743 ANIA_05020 ANIA_05482 ANIA_06266 ANIA_06334 ANIA_06688 ANIA_06838 ANIA_07487 ANIA_07570 ANIA_08182 ANIA_10315 ANIA_10595 ANIA_10627
0.000424884	24	50	2.26688	Protein processing in endoplasmic reticulum	http://www.genome.jp/kegg-bin/show_pathway?ani04141	ANIA_00261 ANIA_00417 ANIA_00551 ANIA_00787 ANIA_00834 ANIA_00847 ANIA_02062 ANIA_03463 ANIA_03720 ANIA_03733 ANIA_04317 ANIA_04589 ANIA_04623 ANIA_04683 ANIA_05748 ANIA_06170 ANIA_06257 ANIA_06307 ANIA_07302 ANIA_07338 ANIA_07426 ANIA_07436 ANIA_07472 ANIA_07721
0.000428311	11	15	3.46329	NcRNA 5 -end processing	http://amigo.geneontology.org/amigo/term/GO:0034471	ANIA_00189 ANIA_00421 ANIA_00804 ANIA_03167 ANIA_03652 ANIA_04460 ANIA_05785 ANIA_06334 ANIA_07305 ANIA_10055 ANIA_10618
0.000438946	17	30	2.67618	Transcription by RNA polymerase III	http://amigo.geneontology.org/amigo/term/GO:0006383	ANIA_00192 ANIA_00321 ANIA_00752 ANIA_01272 ANIA_01447 ANIA_02135 ANIA_02415 ANIA_02747 ANIA_03166 ANIA_04949 ANIA_06558 ANIA_07342 ANIA_07608 ANIA_07997 ANIA_08272 ANIA_09125 ANIA_11183
0.000529689	15	25	2.8336	COPII-coated ER to Golgi transport vesicle	http://amigo.geneontology.org/amigo/term/GO:0030134	ANIA_00261 ANIA_01154 ANIA_02738 ANIA_03080 ANIA_03720 ANIA_04165 ANIA_04317 ANIA_04446 ANIA_06257 ANIA_06307 ANIA_07302 ANIA_07679 ANIA_08194 ANIA_10313 ANIA_10724
0.000551027	13	20	3.06973	Nuclear periphery	http://amigo.geneontology.org/amigo/term/GO:0034399	ANIA_00074 ANIA_00905 ANIA_00906 ANIA_00926 ANIA_01379 ANIA_02120 ANIA_02431 ANIA_02773 ANIA_04499 ANIA_04595 ANIA_04596 ANIA_05717 ANIA_08787
0.000565174	8	9	4.19793	Nuclear exosome (RNase complex)	http://amigo.geneontology.org/amigo/term/GO:0000176	ANIA_02153 ANIA_03657 ANIA_03812 ANIA_04617 ANIA_06111 ANIA_06244 ANIA_10406 ANIA_11250
0.000574846	165	589	1.32299	Adenyl nucleotide binding	http://amigo.geneontology.org/amigo/term/GO:0030554	ANIA_00044 ANIA_00114 ANIA_00118 ANIA_00124 ANIA_00126 ANIA_00133 ANIA_00204 ANIA_00228 ANIA_00247 ANIA_00259 ANIA_00327 ANIA_00381 ANIA_00404 ANIA_00490 ANIA_00565 ANIA_00583 ANIA_00589 ANIA_00637 ANIA_00822 ANIA_00847 ANIA_00873 ANIA_00894 ANIA_00944 ANIA_01189 ANIA_01201 ANIA_01207 ANIA_01222 ANIA_01256 ANIA_01366 ANIA_01523 ANIA_01560 ANIA_01564 ANIA_01628 ANIA_01708 ANIA_01709 ANIA_01710 ANI…
0.000584307	9	11	3.864	SnRNA metabolic process	http://amigo.geneontology.org/amigo/term/GO:0016073	ANIA_00695 ANIA_02153 ANIA_03812 ANIA_04617 ANIA_06111 ANIA_06244 ANIA_08254 ANIA_08851 ANIA_10406
0.000591202	20	39	2.42188	Mitochondrial translation	http://amigo.geneontology.org/amigo/term/GO:0032543	ANIA_00123 ANIA_01084 ANIA_01954 ANIA_02057 ANIA_03173 ANIA_03649 ANIA_03832 ANIA_03894 ANIA_04954 ANIA_05897 ANIA_06039 ANIA_06376 ANIA_06526 ANIA_06904 ANIA_07449 ANIA_07699 ANIA_07701 ANIA_08653 ANIA_08794 ANIA_10353
0.000621142	103	339	1.43491	Cellular protein-containing complex assembly	http://amigo.geneontology.org/amigo/term/GO:0034622	ANIA_00228 ANIA_00262 ANIA_00316 ANIA_00327 ANIA_00359 ANIA_00421 ANIA_00448 ANIA_00559 ANIA_00676 ANIA_00728 ANIA_00794 ANIA_00843 ANIA_00872 ANIA_00906 ANIA_01013 ANIA_01166 ANIA_01270 ANIA_01286 ANIA_01322 ANIA_01382 ANIA_01495 ANIA_01635 ANIA_02007 ANIA_02105 ANIA_02268 ANIA_02283 ANIA_02491 ANIA_02693 ANIA_02734 ANIA_02743 ANIA_02850 ANIA_02907 ANIA_02997 ANIA_03055 ANIA_03062 ANIA_03067 ANI…
0.000622101	23	48	2.26295	MRNA transport	http://amigo.geneontology.org/amigo/term/GO:0051028	ANIA_00282 ANIA_00420 ANIA_01157 ANIA_01190 ANIA_01379 ANIA_03657 ANIA_03739 ANIA_04000 ANIA_04317 ANIA_04417 ANIA_05337 ANIA_05627 ANIA_05717 ANIA_05889 ANIA_06143 ANIA_06507 ANIA_06556 ANIA_06651 ANIA_06978 ANIA_08038 ANIA_09109 ANIA_10112 ANIA_11250
0.000622101	165	590	1.32075	Catalytic complex	http://amigo.geneontology.org/amigo/term/GO:1902494	ANIA_00067 ANIA_00118 ANIA_00189 ANIA_00190 ANIA_00192 ANIA_00260 ANIA_00292 ANIA_00321 ANIA_00327 ANIA_00357 ANIA_00420 ANIA_00636 ANIA_00695 ANIA_00747 ANIA_00752 ANIA_00794 ANIA_00808 ANIA_00814 ANIA_00883 ANIA_00896 ANIA_00901 ANIA_00905 ANIA_01063 ANIA_01208 ANIA_01217 ANIA_01369 ANIA_01408 ANIA_01447 ANIA_01454 ANIA_01455 ANIA_01459 ANIA_01495 ANIA_01525 ANIA_01620 ANIA_01775 ANIA_01929 ANI…
0.000634546	59	171	1.62946	Methyltransferase activity	http://amigo.geneontology.org/amigo/term/GO:0008168	ANIA_00092 ANIA_00130 ANIA_00134 ANIA_00141 ANIA_00288 ANIA_00625 ANIA_00745 ANIA_00757 ANIA_00761 ANIA_00807 ANIA_01170 ANIA_01445 ANIA_01751 ANIA_01957 ANIA_02190 ANIA_02547 ANIA_02557 ANIA_02609 ANIA_02735 ANIA_03096 ANIA_03313 ANIA_03537 ANIA_03603 ANIA_04008 ANIA_04443 ANIA_04587 ANIA_04613 ANIA_05415 ANIA_05688 ANIA_05789 ANIA_05871 ANIA_05914 ANIA_05998 ANIA_06072 ANIA_06162 ANIA_06568 ANI…
0.000668538	291	1125	1.2216	Cellular component organization	http://amigo.geneontology.org/amigo/term/GO:0016043	ANIA_00118 ANIA_00133 ANIA_00228 ANIA_00261 ANIA_00262 ANIA_00316 ANIA_00327 ANIA_00359 ANIA_00414 ANIA_00421 ANIA_00448 ANIA_00558 ANIA_00559 ANIA_00667 ANIA_00676 ANIA_00715 ANIA_00728 ANIA_00747 ANIA_00794 ANIA_00808 ANIA_00843 ANIA_00844 ANIA_00848 ANIA_00872 ANIA_00905 ANIA_00906 ANIA_00910 ANIA_01013 ANIA_01064 ANIA_01099 ANIA_01154 ANIA_01157 ANIA_01166 ANIA_01182 ANIA_01189 ANIA_01190 ANI…
0.000687739	164	587	1.31945	Adenyl ribonucleotide binding	http://amigo.geneontology.org/amigo/term/GO:0032559	ANIA_00044 ANIA_00114 ANIA_00118 ANIA_00124 ANIA_00126 ANIA_00133 ANIA_00204 ANIA_00228 ANIA_00247 ANIA_00259 ANIA_00327 ANIA_00381 ANIA_00404 ANIA_00490 ANIA_00565 ANIA_00583 ANIA_00589 ANIA_00637 ANIA_00822 ANIA_00847 ANIA_00873 ANIA_00894 ANIA_00944 ANIA_01189 ANIA_01201 ANIA_01207 ANIA_01222 ANIA_01256 ANIA_01366 ANIA_01523 ANIA_01560 ANIA_01564 ANIA_01628 ANIA_01708 ANIA_01709 ANIA_01710 ANI…
0.000744488	14	23	2.87467	Sno(s)RNA-containing ribonucleoprotein complex	http://amigo.geneontology.org/amigo/term/GO:0005732	ANIA_00189 ANIA_00695 ANIA_00728 ANIA_00745 ANIA_01319 ANIA_03167 ANIA_03652 ANIA_04298 ANIA_04631 ANIA_08254 ANIA_08851 ANIA_10352 ANIA_10712 ANIA_10966
0.000744488	12	18	3.14845	DNA replication origin binding	http://amigo.geneontology.org/amigo/term/GO:0003688	ANIA_00228 ANIA_00872 ANIA_01207 ANIA_02491 ANIA_04959 ANIA_05676 ANIA_05892 ANIA_05992 ANIA_06070 ANIA_07994 ANIA_10497 ANIA_10755
0.000744488	12	18	3.14845	Pyrimidine metabolism	http://www.genome.jp/kegg-bin/show_pathway?ani00240	ANIA_00271 ANIA_00474 ANIA_00565 ANIA_01823 ANIA_05884 ANIA_05909 ANIA_05939 ANIA_06157 ANIA_07429 ANIA_07471 ANIA_08216 ANIA_08418
0.000795194	179	651	1.29855	Endomembrane system	http://amigo.geneontology.org/amigo/term/GO:0012505	ANIA_00104 ANIA_00112 ANIA_00246 ANIA_00248 ANIA_00261 ANIA_00367 ANIA_00417 ANIA_00420 ANIA_00502 ANIA_00551 ANIA_00554 ANIA_00636 ANIA_00676 ANIA_00743 ANIA_00753 ANIA_00787 ANIA_00834 ANIA_00847 ANIA_00851 ANIA_00906 ANIA_00922 ANIA_00926 ANIA_00954 ANIA_01064 ANIA_01154 ANIA_01157 ANIA_01165 ANIA_01177 ANIA_01190 ANIA_01238 ANIA_01272 ANIA_01379 ANIA_01382 ANIA_01455 ANIA_01459 ANIA_01525 ANI…
0.000795194	31	74	1.97842	Microtubule cytoskeleton organization	http://amigo.geneontology.org/amigo/term/GO:0000226	ANIA_00118 ANIA_00316 ANIA_00414 ANIA_00676 ANIA_00715 ANIA_00848 ANIA_01182 ANIA_01560 ANIA_02128 ANIA_02862 ANIA_03062 ANIA_03589 ANIA_04182 ANIA_04417 ANIA_04513 ANIA_04664 ANIA_05057 ANIA_05531 ANIA_05815 ANIA_05829 ANIA_06125 ANIA_06340 ANIA_06838 ANIA_06865 ANIA_06978 ANIA_07498 ANIA_07570 ANIA_08286 ANIA_08862 ANIA_10137 ANIA_10627
0.000806917	18	34	2.50024	Replication fork	http://amigo.geneontology.org/amigo/term/GO:0005657	ANIA_00260 ANIA_00872 ANIA_01208 ANIA_02491 ANIA_02969 ANIA_03033 ANIA_04959 ANIA_05102 ANIA_06070 ANIA_06300 ANIA_06517 ANIA_06687 ANIA_06895 ANIA_07325 ANIA_10470 ANIA_10635 ANIA_10755 ANIA_10855
0.000833247	61	180	1.60046	Transferase activity, transferring one-carbon groups	http://amigo.geneontology.org/amigo/term/GO:0016741	ANIA_00092 ANIA_00130 ANIA_00134 ANIA_00141 ANIA_00288 ANIA_00565 ANIA_00625 ANIA_00745 ANIA_00757 ANIA_00761 ANIA_00807 ANIA_01170 ANIA_01445 ANIA_01751 ANIA_01957 ANIA_02190 ANIA_02547 ANIA_02557 ANIA_02609 ANIA_02735 ANIA_03096 ANIA_03313 ANIA_03537 ANIA_03603 ANIA_04008 ANIA_04443 ANIA_04464 ANIA_04587 ANIA_04613 ANIA_05415 ANIA_05688 ANIA_05789 ANIA_05871 ANIA_05914 ANIA_05998 ANIA_06072 ANI…
0.000852386	99	326	1.43418	Cellular macromolecule localization	http://amigo.geneontology.org/amigo/term/GO:0070727	ANIA_00261 ANIA_00417 ANIA_00559 ANIA_00747 ANIA_00753 ANIA_00834 ANIA_00846 ANIA_00906 ANIA_00926 ANIA_01064 ANIA_01099 ANIA_01154 ANIA_01177 ANIA_01190 ANIA_01223 ANIA_01272 ANIA_01282 ANIA_01379 ANIA_01394 ANIA_01525 ANIA_01560 ANIA_01892 ANIA_01940 ANIA_01980 ANIA_02062 ANIA_02086 ANIA_02120 ANIA_02140 ANIA_02142 ANIA_02431 ANIA_02518 ANIA_02687 ANIA_02862 ANIA_02927 ANIA_03026 ANIA_03029 ANI…
0.000902254	38	98	1.83124	Nuclear chromosome segregation	http://amigo.geneontology.org/amigo/term/GO:0098813	ANIA_00676 ANIA_00848 ANIA_00905 ANIA_01182 ANIA_01223 ANIA_01286 ANIA_01560 ANIA_02128 ANIA_02160 ANIA_02511 ANIA_02927 ANIA_02963 ANIA_03910 ANIA_03946 ANIA_04265 ANIA_04513 ANIA_04597 ANIA_04735 ANIA_04752 ANIA_04969 ANIA_05057 ANIA_05102 ANIA_05115 ANIA_05133 ANIA_05221 ANIA_05406 ANIA_05495 ANIA_05899 ANIA_06517 ANIA_06554 ANIA_06978 ANIA_07296 ANIA_08013 ANIA_08056 ANIA_08783 ANIA_10137 ANI…
0.000925271	42	112	1.771	GTP binding	http://amigo.geneontology.org/amigo/term/GO:0005525	ANIA_00182 ANIA_00259 ANIA_00316 ANIA_00449 ANIA_00676 ANIA_00804 ANIA_00889 ANIA_01084 ANIA_01182 ANIA_01215 ANIA_01223 ANIA_01322 ANIA_01394 ANIA_01408 ANIA_01666 ANIA_01911 ANIA_02687 ANIA_03171 ANIA_03419 ANIA_03832 ANIA_04038 ANIA_04218 ANIA_04470 ANIA_04667 ANIA_04685 ANIA_04708 ANIA_04743 ANIA_05020 ANIA_05482 ANIA_05865 ANIA_06150 ANIA_06266 ANIA_06334 ANIA_06688 ANIA_06838 ANIA_07487 ANI…
0.000925271	42	112	1.771	Guanyl nucleotide binding	http://amigo.geneontology.org/amigo/term/GO:0019001	ANIA_00182 ANIA_00259 ANIA_00316 ANIA_00449 ANIA_00676 ANIA_00804 ANIA_00889 ANIA_01084 ANIA_01182 ANIA_01215 ANIA_01223 ANIA_01322 ANIA_01394 ANIA_01408 ANIA_01666 ANIA_01911 ANIA_02687 ANIA_03171 ANIA_03419 ANIA_03832 ANIA_04038 ANIA_04218 ANIA_04470 ANIA_04667 ANIA_04685 ANIA_04708 ANIA_04743 ANIA_05020 ANIA_05482 ANIA_05865 ANIA_06150 ANIA_06266 ANIA_06334 ANIA_06688 ANIA_06838 ANIA_07487 ANI…
0.000925271	42	112	1.771	Guanyl ribonucleotide binding	http://amigo.geneontology.org/amigo/term/GO:0032561	ANIA_00182 ANIA_00259 ANIA_00316 ANIA_00449 ANIA_00676 ANIA_00804 ANIA_00889 ANIA_01084 ANIA_01182 ANIA_01215 ANIA_01223 ANIA_01322 ANIA_01394 ANIA_01408 ANIA_01666 ANIA_01911 ANIA_02687 ANIA_03171 ANIA_03419 ANIA_03832 ANIA_04038 ANIA_04218 ANIA_04470 ANIA_04667 ANIA_04685 ANIA_04708 ANIA_04743 ANIA_05020 ANIA_05482 ANIA_05865 ANIA_06150 ANIA_06266 ANIA_06334 ANIA_06688 ANIA_06838 ANIA_07487 ANI…
0.00134051	10	14	3.37334	Pseudouridine synthesis	http://amigo.geneontology.org/amigo/term/GO:0001522	ANIA_00072 ANIA_00695 ANIA_00728 ANIA_03170 ANIA_05155 ANIA_06165 ANIA_08254 ANIA_08851 ANIA_10712 ANIA_10936
0.00134051	123	426	1.36359	Carbohydrate derivative metabolic process	http://amigo.geneontology.org/amigo/term/GO:1901135	ANIA_00067 ANIA_00104 ANIA_00130 ANIA_00221 ANIA_00246 ANIA_00259 ANIA_00271 ANIA_00357 ANIA_00367 ANIA_00474 ANIA_00490 ANIA_00502 ANIA_00549 ANIA_00551 ANIA_00565 ANIA_00636 ANIA_00667 ANIA_00743 ANIA_00787 ANIA_01115 ANIA_01165 ANIA_01202 ANIA_01263 ANIA_01455 ANIA_01459 ANIA_01502 ANIA_01523 ANIA_01620 ANIA_01624 ANIA_01775 ANIA_01888 ANIA_01911 ANIA_01965 ANIA_02096 ANIA_02240 ANIA_02315 ANI…
0.00134051	10	14	3.37334	Exoribonuclease complex	http://amigo.geneontology.org/amigo/term/GO:1905354	ANIA_02153 ANIA_03657 ANIA_03812 ANIA_04617 ANIA_06111 ANIA_06244 ANIA_06822 ANIA_10406 ANIA_10590 ANIA_11250
0.00134051	19	38	2.36133	Nucleocytoplasmic transport	http://www.genome.jp/kegg-bin/show_pathway?ani03013	ANIA_00906 ANIA_01064 ANIA_01157 ANIA_01238 ANIA_01379 ANIA_02120 ANIA_02142 ANIA_02431 ANIA_04293 ANIA_04317 ANIA_04499 ANIA_04596 ANIA_05627 ANIA_05717 ANIA_05889 ANIA_06006 ANIA_06507 ANIA_06591 ANIA_08016
0.00135604	14	24	2.75489	Chaperone-mediated protein folding	http://amigo.geneontology.org/amigo/term/GO:0061077	ANIA_00381 ANIA_01282 ANIA_01851 ANIA_01904 ANIA_02062 ANIA_02149 ANIA_02918 ANIA_03070 ANIA_03134 ANIA_03598 ANIA_04616 ANIA_05713 ANIA_08343 ANIA_08631
0.00135604	14	24	2.75489	Nuclear replication fork	http://amigo.geneontology.org/amigo/term/GO:0043596	ANIA_00260 ANIA_00872 ANIA_01208 ANIA_02491 ANIA_03033 ANIA_04959 ANIA_05102 ANIA_06070 ANIA_06687 ANIA_07325 ANIA_10470 ANIA_10635 ANIA_10755 ANIA_10855
0.0014487	38	100	1.79461	Mitotic nuclear division	http://amigo.geneontology.org/amigo/term/GO:0140014	ANIA_00676 ANIA_00715 ANIA_00808 ANIA_00848 ANIA_00905 ANIA_01182 ANIA_01223 ANIA_01286 ANIA_01560 ANIA_02128 ANIA_02160 ANIA_02511 ANIA_02927 ANIA_02963 ANIA_03941 ANIA_03946 ANIA_04265 ANIA_04513 ANIA_04597 ANIA_04735 ANIA_04969 ANIA_05057 ANIA_05115 ANIA_05133 ANIA_05495 ANIA_05717 ANIA_05881 ANIA_05899 ANIA_06340 ANIA_06554 ANIA_06865 ANIA_06978 ANIA_07296 ANIA_08013 ANIA_08056 ANIA_10137 ANI…
0.00150068	6	6	4.72267	Exonucleolytic trimming to generate mature 3 -end of 5.8S rRNA from tricistronic rRNA transcript (SSU-rRNA, 5.8S rRNA, LSU-rRNA)	http://amigo.geneontology.org/amigo/term/GO:0000467	ANIA_03657 ANIA_04617 ANIA_06111 ANIA_06244 ANIA_10406 ANIA_11250
0.00150068	6	6	4.72267	TRNA catabolic process	http://amigo.geneontology.org/amigo/term/GO:0016078	ANIA_03657 ANIA_04617 ANIA_06111 ANIA_06244 ANIA_10406 ANIA_11250
0.00150068	6	6	4.72267	Nuclear polyadenylation-dependent tRNA catabolic process	http://amigo.geneontology.org/amigo/term/GO:0071038	ANIA_03657 ANIA_04617 ANIA_06111 ANIA_06244 ANIA_10406 ANIA_11250
0.00150068	6	6	4.72267	TRNA surveillance	http://amigo.geneontology.org/amigo/term/GO:0106354	ANIA_03657 ANIA_04617 ANIA_06111 ANIA_06244 ANIA_10406 ANIA_11250
0.00150068	6	6	4.72267	MCM complex	http://amigo.geneontology.org/amigo/term/GO:0042555	ANIA_00228 ANIA_02491 ANIA_05992 ANIA_06070 ANIA_07994 ANIA_10497
0.00150068	6	6	4.72267	Eukaryotic translation initiation factor 3 complex, eIF3m	http://amigo.geneontology.org/amigo/term/GO:0071541	ANIA_02743 ANIA_02997 ANIA_04259 ANIA_07540 ANIA_10182 ANIA_10765
0.00150068	6	6	4.72267	U3 snoRNA binding	http://amigo.geneontology.org/amigo/term/GO:0034511	ANIA_01319 ANIA_01354 ANIA_04456 ANIA_04460 ANIA_06266 ANIA_06334
0.00150068	6	6	4.72267	Small ribosomal subunit rRNA binding	http://amigo.geneontology.org/amigo/term/GO:0070181	ANIA_03413 ANIA_05960 ANIA_06679 ANIA_07449 ANIA_10052 ANIA_10161
0.00152616	103	347	1.40183	Protein-containing complex assembly	http://amigo.geneontology.org/amigo/term/GO:0065003	ANIA_00228 ANIA_00262 ANIA_00316 ANIA_00327 ANIA_00359 ANIA_00421 ANIA_00448 ANIA_00559 ANIA_00676 ANIA_00728 ANIA_00794 ANIA_00843 ANIA_00872 ANIA_00906 ANIA_01013 ANIA_01166 ANIA_01270 ANIA_01286 ANIA_01322 ANIA_01382 ANIA_01495 ANIA_01635 ANIA_02007 ANIA_02105 ANIA_02268 ANIA_02283 ANIA_02491 ANIA_02693 ANIA_02734 ANIA_02743 ANIA_02850 ANIA_02907 ANIA_02997 ANIA_03055 ANIA_03062 ANIA_03067 ANI…
0.00164359	9	12	3.542	Pyrimidine ribonucleotide metabolic process	http://amigo.geneontology.org/amigo/term/GO:0009218	ANIA_00067 ANIA_00490 ANIA_00565 ANIA_05884 ANIA_05909 ANIA_06157 ANIA_07502 ANIA_08216 ANIA_10131
0.00169697	34	87	1.84564	Sister chromatid segregation	http://amigo.geneontology.org/amigo/term/GO:0000819	ANIA_00676 ANIA_00848 ANIA_00905 ANIA_01182 ANIA_01223 ANIA_01286 ANIA_01560 ANIA_02128 ANIA_02160 ANIA_02511 ANIA_02927 ANIA_02963 ANIA_03946 ANIA_04265 ANIA_04513 ANIA_04597 ANIA_04735 ANIA_04969 ANIA_05057 ANIA_05102 ANIA_05115 ANIA_05133 ANIA_05406 ANIA_05495 ANIA_05899 ANIA_06517 ANIA_06554 ANIA_06978 ANIA_07296 ANIA_08013 ANIA_08056 ANIA_10137 ANIA_10225 ANIA_10433
0.00170085	138	490	1.33006	Macromolecule localization	http://amigo.geneontology.org/amigo/term/GO:0033036	ANIA_00124 ANIA_00261 ANIA_00282 ANIA_00406 ANIA_00417 ANIA_00420 ANIA_00448 ANIA_00559 ANIA_00747 ANIA_00753 ANIA_00834 ANIA_00843 ANIA_00844 ANIA_00846 ANIA_00906 ANIA_00922 ANIA_00926 ANIA_01064 ANIA_01099 ANIA_01154 ANIA_01157 ANIA_01177 ANIA_01190 ANIA_01223 ANIA_01272 ANIA_01282 ANIA_01379 ANIA_01394 ANIA_01525 ANIA_01560 ANIA_01892 ANIA_01940 ANIA_01980 ANIA_02062 ANIA_02086 ANIA_02120 ANI…
0.00172366	16	30	2.51876	Membrane coat	http://amigo.geneontology.org/amigo/term/GO:0030117	ANIA_00261 ANIA_00922 ANIA_01177 ANIA_03026 ANIA_03029 ANIA_03080 ANIA_03720 ANIA_04317 ANIA_04463 ANIA_04547 ANIA_05972 ANIA_06080 ANIA_06257 ANIA_07016 ANIA_07741 ANIA_08795
0.00172366	16	30	2.51876	Coated membrane	http://amigo.geneontology.org/amigo/term/GO:0048475	ANIA_00261 ANIA_00922 ANIA_01177 ANIA_03026 ANIA_03029 ANIA_03080 ANIA_03720 ANIA_04317 ANIA_04463 ANIA_04547 ANIA_05972 ANIA_06080 ANIA_06257 ANIA_07016 ANIA_07741 ANIA_08795
0.00174624	31	77	1.90133	DNA-dependent DNA replication	http://amigo.geneontology.org/amigo/term/GO:0006261	ANIA_00228 ANIA_00260 ANIA_00872 ANIA_01207 ANIA_02491 ANIA_02969 ANIA_03033 ANIA_03067 ANIA_04752 ANIA_04771 ANIA_04959 ANIA_05102 ANIA_05676 ANIA_05892 ANIA_05992 ANIA_06070 ANIA_06261 ANIA_06300 ANIA_06517 ANIA_06687 ANIA_06891 ANIA_06895 ANIA_06896 ANIA_07325 ANIA_07994 ANIA_10434 ANIA_10470 ANIA_10497 ANIA_10635 ANIA_10755 ANIA_10855
0.00185034	79	254	1.46886	Chromosome	http://amigo.geneontology.org/amigo/term/GO:0005694	ANIA_00044 ANIA_00126 ANIA_00260 ANIA_00276 ANIA_00327 ANIA_00872 ANIA_01170 ANIA_01207 ANIA_01208 ANIA_01217 ANIA_01286 ANIA_01392 ANIA_01399 ANIA_01660 ANIA_01690 ANIA_01905 ANIA_01929 ANIA_01977 ANIA_02141 ANIA_02160 ANIA_02452 ANIA_02491 ANIA_02511 ANIA_02513 ANIA_02927 ANIA_02963 ANIA_02969 ANIA_03033 ANIA_03067 ANIA_03158 ANIA_03620 ANIA_04265 ANIA_04320 ANIA_04509 ANIA_04597 ANIA_04752 ANI…
0.00187304	48	137	1.65466	Nuclear division	http://amigo.geneontology.org/amigo/term/GO:0000280	ANIA_00316 ANIA_00676 ANIA_00715 ANIA_00808 ANIA_00848 ANIA_00905 ANIA_01182 ANIA_01223 ANIA_01286 ANIA_01560 ANIA_02068 ANIA_02128 ANIA_02160 ANIA_02511 ANIA_02927 ANIA_02963 ANIA_03910 ANIA_03941 ANIA_03946 ANIA_04265 ANIA_04513 ANIA_04597 ANIA_04735 ANIA_04752 ANIA_04969 ANIA_05057 ANIA_05115 ANIA_05133 ANIA_05406 ANIA_05495 ANIA_05717 ANIA_05829 ANIA_05881 ANIA_05899 ANIA_06340 ANIA_06554 ANI…
0.00189122	8	10	3.77814	RRNA 5 -end processing	http://amigo.geneontology.org/amigo/term/GO:0000967	ANIA_00421 ANIA_03167 ANIA_04460 ANIA_05785 ANIA_06334 ANIA_07305 ANIA_10055 ANIA_10618
0.00189122	13	22	2.79067	Nucleus localization	http://amigo.geneontology.org/amigo/term/GO:0051647	ANIA_00118 ANIA_00316 ANIA_00420 ANIA_01182 ANIA_01454 ANIA_01953 ANIA_03062 ANIA_03589 ANIA_04664 ANIA_05829 ANIA_06125 ANIA_07570 ANIA_10627
0.00189122	8	10	3.77814	Cytoplasmic exosome (RNase complex)	http://amigo.geneontology.org/amigo/term/GO:0000177	ANIA_02153 ANIA_03657 ANIA_03812 ANIA_04617 ANIA_06111 ANIA_06244 ANIA_10406 ANIA_11250
0.00189122	8	10	3.77814	Chaperone complex	http://amigo.geneontology.org/amigo/term/GO:0101031	ANIA_00381 ANIA_01851 ANIA_01904 ANIA_02149 ANIA_02918 ANIA_03070 ANIA_03134 ANIA_05713
0.00189122	13	22	2.79067	Nuclear migration	http://amigo.geneontology.org/amigo/term/GO:0007097	ANIA_00118 ANIA_00316 ANIA_00420 ANIA_01182 ANIA_01454 ANIA_01953 ANIA_03062 ANIA_03589 ANIA_04664 ANIA_05829 ANIA_06125 ANIA_07570 ANIA_10627
0.00190045	19	39	2.30079	Nucleoside monophosphate metabolic process	http://amigo.geneontology.org/amigo/term/GO:0009123	ANIA_00259 ANIA_00271 ANIA_00565 ANIA_01965 ANIA_04464 ANIA_05566 ANIA_05884 ANIA_05909 ANIA_06157 ANIA_06209 ANIA_06541 ANIA_06711 ANIA_06993 ANIA_07028 ANIA_07429 ANIA_07502 ANIA_08213 ANIA_10131 ANIA_10188
0.00193801	7	8	4.13234	Pre-replicative complex assembly	http://amigo.geneontology.org/amigo/term/GO:0036388	ANIA_00228 ANIA_00872 ANIA_02491 ANIA_05992 ANIA_06070 ANIA_07994 ANIA_10497
0.00193801	7	8	4.13234	Pre-replicative complex assembly involved in nuclear cell cycle DNA replication	http://amigo.geneontology.org/amigo/term/GO:0006267	ANIA_00228 ANIA_00872 ANIA_02491 ANIA_05992 ANIA_06070 ANIA_07994 ANIA_10497
0.00193801	7	8	4.13234	Pre-replicative complex assembly involved in cell cycle DNA replication	http://amigo.geneontology.org/amigo/term/GO:1902299	ANIA_00228 ANIA_00872 ANIA_02491 ANIA_05992 ANIA_06070 ANIA_07994 ANIA_10497
0.00201671	11	17	3.05584	RRNA methylation	http://amigo.geneontology.org/amigo/term/GO:0031167	ANIA_00092 ANIA_00625 ANIA_00745 ANIA_01957 ANIA_03313 ANIA_05789 ANIA_05871 ANIA_08073 ANIA_08849 ANIA_08855 ANIA_10721
0.00210699	40	109	1.73309	Negative regulation of gene expression	http://amigo.geneontology.org/amigo/term/GO:0010629	ANIA_00242 ANIA_00282 ANIA_00406 ANIA_00707 ANIA_00974 ANIA_00997 ANIA_01286 ANIA_01519 ANIA_02153 ANIA_02717 ANIA_03067 ANIA_03411 ANIA_03657 ANIA_03739 ANIA_03812 ANIA_03825 ANIA_04000 ANIA_04202 ANIA_04617 ANIA_04631 ANIA_05337 ANIA_05408 ANIA_05694 ANIA_05931 ANIA_06111 ANIA_06244 ANIA_06507 ANIA_06540 ANIA_06587 ANIA_06600 ANIA_06902 ANIA_07474 ANIA_07492 ANIA_08038 ANIA_09077 ANIA_09090 ANI…
0.0023773	39	106	1.73759	Organelle localization	http://amigo.geneontology.org/amigo/term/GO:0051640	ANIA_00118 ANIA_00316 ANIA_00420 ANIA_00844 ANIA_00848 ANIA_00922 ANIA_01182 ANIA_01256 ANIA_01454 ANIA_01953 ANIA_02210 ANIA_02262 ANIA_02518 ANIA_03062 ANIA_03589 ANIA_03745 ANIA_03910 ANIA_04087 ANIA_04664 ANIA_04908 ANIA_04969 ANIA_05115 ANIA_05482 ANIA_05627 ANIA_05789 ANIA_05829 ANIA_05865 ANIA_06125 ANIA_06143 ANIA_06865 ANIA_06978 ANIA_07143 ANIA_07570 ANIA_08862 ANIA_10061 ANIA_10434 ANI…
0.00269881	16	31	2.43751	Organellar large ribosomal subunit	http://amigo.geneontology.org/amigo/term/GO:0000315	ANIA_00123 ANIA_01095 ANIA_01770 ANIA_02057 ANIA_02949 ANIA_03635 ANIA_03649 ANIA_04652 ANIA_05897 ANIA_06376 ANIA_06891 ANIA_06904 ANIA_08256 ANIA_08794 ANIA_10922 ANIA_11230
0.00269881	16	31	2.43751	Mitochondrial large ribosomal subunit	http://amigo.geneontology.org/amigo/term/GO:0005762	ANIA_00123 ANIA_01095 ANIA_01770 ANIA_02057 ANIA_02949 ANIA_03635 ANIA_03649 ANIA_04652 ANIA_05897 ANIA_06376 ANIA_06891 ANIA_06904 ANIA_08256 ANIA_08794 ANIA_10922 ANIA_11230
0.00280556	263	1027	1.20941	Protein binding	http://amigo.geneontology.org/amigo/term/GO:0005515	ANIA_00067 ANIA_00118 ANIA_00203 ANIA_00211 ANIA_00214 ANIA_00288 ANIA_00292 ANIA_00305 ANIA_00310 ANIA_00312 ANIA_00359 ANIA_00380 ANIA_00381 ANIA_00406 ANIA_00414 ANIA_00420 ANIA_00435 ANIA_00461 ANIA_00463 ANIA_00481 ANIA_00490 ANIA_00539 ANIA_00698 ANIA_00750 ANIA_00794 ANIA_00808 ANIA_00814 ANIA_00862 ANIA_00883 ANIA_00905 ANIA_00906 ANIA_00910 ANIA_01099 ANIA_01157 ANIA_01170 ANIA_01205 ANI…
0.00301465	35	93	1.77735	DNA replication	http://amigo.geneontology.org/amigo/term/GO:0006260	ANIA_00228 ANIA_00260 ANIA_00872 ANIA_01207 ANIA_02160 ANIA_02452 ANIA_02491 ANIA_02969 ANIA_03033 ANIA_03067 ANIA_04509 ANIA_04752 ANIA_04771 ANIA_04959 ANIA_05102 ANIA_05676 ANIA_05892 ANIA_05992 ANIA_06070 ANIA_06261 ANIA_06300 ANIA_06517 ANIA_06687 ANIA_06891 ANIA_06895 ANIA_06896 ANIA_07007 ANIA_07325 ANIA_07994 ANIA_10434 ANIA_10470 ANIA_10497 ANIA_10635 ANIA_10755 ANIA_10855
0.00333055	13	23	2.66933	de novo protein folding	http://amigo.geneontology.org/amigo/term/GO:0006458	ANIA_00381 ANIA_01851 ANIA_01904 ANIA_02062 ANIA_02149 ANIA_02918 ANIA_03070 ANIA_03134 ANIA_04616 ANIA_04623 ANIA_05713 ANIA_06736 ANIA_07143
0.00333055	13	23	2.66933	Signal sequence binding	http://amigo.geneontology.org/amigo/term/GO:0005048	ANIA_00559 ANIA_00906 ANIA_00926 ANIA_02086 ANIA_02120 ANIA_02142 ANIA_02431 ANIA_04580 ANIA_05627 ANIA_05717 ANIA_07721 ANIA_07731 ANIA_11226
0.00333055	23	53	2.04946	Endoplasmic reticulum to Golgi vesicle-mediated transport	http://amigo.geneontology.org/amigo/term/GO:0006888	ANIA_00261 ANIA_00922 ANIA_01154 ANIA_01177 ANIA_02518 ANIA_02738 ANIA_03026 ANIA_03080 ANIA_03720 ANIA_04165 ANIA_04317 ANIA_04446 ANIA_04495 ANIA_04547 ANIA_05972 ANIA_06257 ANIA_06307 ANIA_07302 ANIA_07679 ANIA_08194 ANIA_10313 ANIA_10724 ANIA_11226
0.0034997	41	115	1.68373	Isomerase activity	http://amigo.geneontology.org/amigo/term/GO:0016853	ANIA_00072 ANIA_00248 ANIA_00380 ANIA_00579 ANIA_00667 ANIA_00765 ANIA_00851 ANIA_01009 ANIA_01564 ANIA_01895 ANIA_02293 ANIA_02545 ANIA_03112 ANIA_03170 ANIA_03184 ANIA_03598 ANIA_04069 ANIA_04234 ANIA_04290 ANIA_04467 ANIA_04555 ANIA_04727 ANIA_05155 ANIA_05406 ANIA_05694 ANIA_05907 ANIA_05970 ANIA_06165 ANIA_06235 ANIA_06993 ANIA_07436 ANIA_07575 ANIA_07625 ANIA_08343 ANIA_08631 ANIA_08851 ANI…
0.0035359	50	148	1.5955	Mitochondrial protein-containing complex	http://amigo.geneontology.org/amigo/term/GO:0098798	ANIA_00123 ANIA_00142 ANIA_00357 ANIA_00559 ANIA_00747 ANIA_00896 ANIA_01063 ANIA_01095 ANIA_01624 ANIA_01770 ANIA_01892 ANIA_01954 ANIA_02057 ANIA_02315 ANIA_02916 ANIA_02949 ANIA_03173 ANIA_03635 ANIA_03649 ANIA_03744 ANIA_04251 ANIA_04434 ANIA_04613 ANIA_04652 ANIA_04977 ANIA_05162 ANIA_05164 ANIA_05597 ANIA_05753 ANIA_05897 ANIA_06039 ANIA_06077 ANIA_06248 ANIA_06306 ANIA_06376 ANIA_06510 ANI…
0.00364903	94	319	1.39163	Cellular protein localization	http://amigo.geneontology.org/amigo/term/GO:0034613	ANIA_00261 ANIA_00417 ANIA_00559 ANIA_00747 ANIA_00834 ANIA_00846 ANIA_00906 ANIA_00926 ANIA_01064 ANIA_01099 ANIA_01154 ANIA_01177 ANIA_01190 ANIA_01223 ANIA_01272 ANIA_01282 ANIA_01379 ANIA_01394 ANIA_01525 ANIA_01560 ANIA_01892 ANIA_01940 ANIA_01980 ANIA_02062 ANIA_02086 ANIA_02120 ANIA_02140 ANIA_02142 ANIA_02431 ANIA_02518 ANIA_02687 ANIA_02862 ANIA_02927 ANIA_03026 ANIA_03029 ANIA_03080 ANI…
0.00373266	14	26	2.54298	Cytoskeleton-dependent cytokinesis	http://amigo.geneontology.org/amigo/term/GO:0061640	ANIA_00676 ANIA_01394 ANIA_02128 ANIA_02687 ANIA_04667 ANIA_05666 ANIA_05686 ANIA_06688 ANIA_06732 ANIA_07032 ANIA_07576 ANIA_08182 ANIA_09463 ANIA_10595
0.00373266	14	26	2.54298	Coated vesicle membrane	http://amigo.geneontology.org/amigo/term/GO:0030662	ANIA_00261 ANIA_00922 ANIA_01177 ANIA_03026 ANIA_03080 ANIA_03720 ANIA_04317 ANIA_04463 ANIA_04547 ANIA_05972 ANIA_06080 ANIA_06257 ANIA_07016 ANIA_07741
0.00383552	9	13	3.26954	RRNA catabolic process	http://amigo.geneontology.org/amigo/term/GO:0016075	ANIA_00707 ANIA_02153 ANIA_03657 ANIA_03812 ANIA_04617 ANIA_06111 ANIA_06244 ANIA_10406 ANIA_11250
0.00383552	9	13	3.26954	NcRNA catabolic process	http://amigo.geneontology.org/amigo/term/GO:0034661	ANIA_00707 ANIA_02153 ANIA_03657 ANIA_03812 ANIA_04617 ANIA_06111 ANIA_06244 ANIA_10406 ANIA_11250
0.00383552	9	13	3.26954	Exosome (RNase complex)	http://amigo.geneontology.org/amigo/term/GO:0000178	ANIA_02153 ANIA_03657 ANIA_03812 ANIA_04617 ANIA_06111 ANIA_06244 ANIA_10406 ANIA_10590 ANIA_11250
0.00383552	262	1028	1.20364	Nucleotide binding	http://amigo.geneontology.org/amigo/term/GO:0000166	ANIA_00044 ANIA_00114 ANIA_00118 ANIA_00124 ANIA_00126 ANIA_00133 ANIA_00174 ANIA_00182 ANIA_00204 ANIA_00228 ANIA_00247 ANIA_00259 ANIA_00316 ANIA_00327 ANIA_00381 ANIA_00404 ANIA_00406 ANIA_00449 ANIA_00490 ANIA_00502 ANIA_00565 ANIA_00583 ANIA_00589 ANIA_00593 ANIA_00623 ANIA_00637 ANIA_00676 ANIA_00804 ANIA_00818 ANIA_00822 ANIA_00847 ANIA_00873 ANIA_00889 ANIA_00894 ANIA_00944 ANIA_00956 ANI…
0.00383552	262	1028	1.20364	Nucleoside phosphate binding	http://amigo.geneontology.org/amigo/term/GO:1901265	ANIA_00044 ANIA_00114 ANIA_00118 ANIA_00124 ANIA_00126 ANIA_00133 ANIA_00174 ANIA_00182 ANIA_00204 ANIA_00228 ANIA_00247 ANIA_00259 ANIA_00316 ANIA_00327 ANIA_00381 ANIA_00404 ANIA_00406 ANIA_00449 ANIA_00490 ANIA_00502 ANIA_00565 ANIA_00583 ANIA_00589 ANIA_00593 ANIA_00623 ANIA_00637 ANIA_00676 ANIA_00804 ANIA_00818 ANIA_00822 ANIA_00847 ANIA_00873 ANIA_00889 ANIA_00894 ANIA_00944 ANIA_00956 ANI…
0.00389613	11	18	2.88608	Sno(s)RNA metabolic process	http://amigo.geneontology.org/amigo/term/GO:0016074	ANIA_00707 ANIA_00745 ANIA_02153 ANIA_03812 ANIA_04617 ANIA_04631 ANIA_05694 ANIA_08276 ANIA_08851 ANIA_10406 ANIA_11066
0.00389613	11	18	2.88608	Sno(s)RNA processing	http://amigo.geneontology.org/amigo/term/GO:0043144	ANIA_00707 ANIA_00745 ANIA_02153 ANIA_03812 ANIA_04617 ANIA_04631 ANIA_05694 ANIA_08276 ANIA_08851 ANIA_10406 ANIA_11066
0.00389613	11	18	2.88608	DNA replication	http://www.genome.jp/kegg-bin/show_pathway?ani03030	ANIA_00260 ANIA_03033 ANIA_03067 ANIA_05114 ANIA_05992 ANIA_06070 ANIA_06300 ANIA_06517 ANIA_07325 ANIA_07493 ANIA_07994
0.0040393	205	783	1.23646	Organelle organization	http://amigo.geneontology.org/amigo/term/GO:0006996	ANIA_00118 ANIA_00228 ANIA_00261 ANIA_00262 ANIA_00316 ANIA_00327 ANIA_00414 ANIA_00421 ANIA_00559 ANIA_00676 ANIA_00715 ANIA_00747 ANIA_00808 ANIA_00843 ANIA_00844 ANIA_00848 ANIA_00905 ANIA_00906 ANIA_00910 ANIA_01013 ANIA_01064 ANIA_01099 ANIA_01154 ANIA_01166 ANIA_01182 ANIA_01190 ANIA_01223 ANIA_01256 ANIA_01286 ANIA_01322 ANIA_01372 ANIA_01379 ANIA_01382 ANIA_01560 ANIA_01660 ANIA_01708 ANI…
0.00406493	16	32	2.36133	Nucleoside monophosphate biosynthetic process	http://amigo.geneontology.org/amigo/term/GO:0009124	ANIA_00271 ANIA_00565 ANIA_01965 ANIA_04464 ANIA_05566 ANIA_05884 ANIA_05909 ANIA_06157 ANIA_06209 ANIA_06541 ANIA_06711 ANIA_06993 ANIA_07028 ANIA_07429 ANIA_07502 ANIA_10131
0.00418449	44	127	1.6362	Nucleobase-containing compound catabolic process	http://amigo.geneontology.org/amigo/term/GO:0034655	ANIA_00242 ANIA_00258 ANIA_00271 ANIA_00282 ANIA_00406 ANIA_00707 ANIA_01115 ANIA_01202 ANIA_01263 ANIA_02153 ANIA_02185 ANIA_02938 ANIA_03411 ANIA_03657 ANIA_03739 ANIA_03812 ANIA_04000 ANIA_04075 ANIA_04412 ANIA_04617 ANIA_04631 ANIA_04958 ANIA_04964 ANIA_05114 ANIA_05337 ANIA_05694 ANIA_05931 ANIA_05939 ANIA_06111 ANIA_06244 ANIA_06507 ANIA_06540 ANIA_06587 ANIA_06600 ANIA_06895 ANIA_06902 ANI…
0.00423126	77	253	1.43733	Chromosome organization	http://amigo.geneontology.org/amigo/term/GO:0051276	ANIA_00228 ANIA_00327 ANIA_00676 ANIA_00848 ANIA_00905 ANIA_01182 ANIA_01190 ANIA_01223 ANIA_01286 ANIA_01379 ANIA_01560 ANIA_01660 ANIA_01708 ANIA_02128 ANIA_02141 ANIA_02160 ANIA_02491 ANIA_02511 ANIA_02717 ANIA_02927 ANIA_02963 ANIA_03067 ANIA_03749 ANIA_03825 ANIA_03910 ANIA_03946 ANIA_04265 ANIA_04293 ANIA_04320 ANIA_04513 ANIA_04555 ANIA_04597 ANIA_04735 ANIA_04969 ANIA_05057 ANIA_05102 ANI…
0.00437367	29	74	1.85078	RNA polymerase complex	http://amigo.geneontology.org/amigo/term/GO:0030880	ANIA_00192 ANIA_00260 ANIA_00292 ANIA_00321 ANIA_00752 ANIA_00794 ANIA_01369 ANIA_01447 ANIA_02135 ANIA_02283 ANIA_02415 ANIA_02717 ANIA_02747 ANIA_02850 ANIA_03033 ANIA_03166 ANIA_03933 ANIA_05910 ANIA_06558 ANIA_06687 ANIA_07608 ANIA_07609 ANIA_08272 ANIA_09102 ANIA_09125 ANIA_10755 ANIA_10855 ANIA_10970 ANIA_11183
0.00447141	210	806	1.23047	Macromolecule modification	http://amigo.geneontology.org/amigo/term/GO:0043412	ANIA_00044 ANIA_00062 ANIA_00072 ANIA_00092 ANIA_00104 ANIA_00124 ANIA_00130 ANIA_00134 ANIA_00141 ANIA_00247 ANIA_00288 ANIA_00292 ANIA_00327 ANIA_00367 ANIA_00380 ANIA_00502 ANIA_00551 ANIA_00625 ANIA_00636 ANIA_00667 ANIA_00695 ANIA_00707 ANIA_00728 ANIA_00745 ANIA_00757 ANIA_00787 ANIA_00794 ANIA_00804 ANIA_00814 ANIA_00818 ANIA_00822 ANIA_00883 ANIA_00905 ANIA_00906 ANIA_00914 ANIA_00956 ANI…
0.00449661	31	81	1.80744	Mitotic sister chromatid segregation	http://amigo.geneontology.org/amigo/term/GO:0000070	ANIA_00676 ANIA_00848 ANIA_00905 ANIA_01182 ANIA_01223 ANIA_01286 ANIA_01560 ANIA_02128 ANIA_02160 ANIA_02511 ANIA_02927 ANIA_02963 ANIA_03946 ANIA_04265 ANIA_04513 ANIA_04597 ANIA_04735 ANIA_04969 ANIA_05057 ANIA_05115 ANIA_05133 ANIA_05495 ANIA_05899 ANIA_06554 ANIA_06978 ANIA_07296 ANIA_08013 ANIA_08056 ANIA_10137 ANIA_10225 ANIA_10433
0.00451075	292	1162	1.18676	Small molecule binding	http://amigo.geneontology.org/amigo/term/GO:0036094	ANIA_00044 ANIA_00114 ANIA_00118 ANIA_00124 ANIA_00126 ANIA_00133 ANIA_00150 ANIA_00174 ANIA_00182 ANIA_00204 ANIA_00228 ANIA_00247 ANIA_00259 ANIA_00316 ANIA_00321 ANIA_00327 ANIA_00381 ANIA_00404 ANIA_00406 ANIA_00449 ANIA_00490 ANIA_00502 ANIA_00565 ANIA_00583 ANIA_00589 ANIA_00593 ANIA_00623 ANIA_00637 ANIA_00676 ANIA_00743 ANIA_00744 ANIA_00804 ANIA_00818 ANIA_00822 ANIA_00847 ANIA_00873 ANI…
0.00468397	22	51	2.03723	Spindle	http://amigo.geneontology.org/amigo/term/GO:0005819	ANIA_00316 ANIA_00676 ANIA_00926 ANIA_00995 ANIA_01182 ANIA_01560 ANIA_02128 ANIA_02862 ANIA_02927 ANIA_04182 ANIA_04513 ANIA_05057 ANIA_05403 ANIA_05815 ANIA_06340 ANIA_06865 ANIA_06978 ANIA_07570 ANIA_08286 ANIA_08783 ANIA_10137 ANIA_10627
0.0048082	28	71	1.86246	DNA-directed RNA polymerase complex	http://amigo.geneontology.org/amigo/term/GO:0000428	ANIA_00192 ANIA_00260 ANIA_00292 ANIA_00321 ANIA_00752 ANIA_00794 ANIA_01369 ANIA_01447 ANIA_02135 ANIA_02283 ANIA_02415 ANIA_02747 ANIA_02850 ANIA_03033 ANIA_03166 ANIA_03933 ANIA_05910 ANIA_06558 ANIA_06687 ANIA_07608 ANIA_07609 ANIA_08272 ANIA_09102 ANIA_09125 ANIA_10755 ANIA_10855 ANIA_10970 ANIA_11183
0.00491587	25	61	1.93552	Endoplasmic reticulum protein-containing complex	http://amigo.geneontology.org/amigo/term/GO:0140534	ANIA_00417 ANIA_00636 ANIA_00834 ANIA_00847 ANIA_01455 ANIA_01459 ANIA_01525 ANIA_01775 ANIA_02062 ANIA_02240 ANIA_03370 ANIA_03826 ANIA_04589 ANIA_04616 ANIA_04683 ANIA_04728 ANIA_04761 ANIA_07426 ANIA_07472 ANIA_07721 ANIA_09460 ANIA_10439 ANIA_10639 ANIA_10702 ANIA_11232
0.00495743	8	11	3.43467	Pyrimidine ribonucleotide biosynthetic process	http://amigo.geneontology.org/amigo/term/GO:0009220	ANIA_00490 ANIA_00565 ANIA_05884 ANIA_05909 ANIA_06157 ANIA_07502 ANIA_08216 ANIA_10131
0.00529446	27	68	1.87518	Nuclear-transcribed mRNA catabolic process	http://amigo.geneontology.org/amigo/term/GO:0000956	ANIA_00282 ANIA_00406 ANIA_00707 ANIA_02153 ANIA_03411 ANIA_03657 ANIA_03739 ANIA_03812 ANIA_04000 ANIA_04617 ANIA_04631 ANIA_05337 ANIA_05694 ANIA_05931 ANIA_06111 ANIA_06244 ANIA_06507 ANIA_06587 ANIA_06600 ANIA_06902 ANIA_07474 ANIA_07492 ANIA_08038 ANIA_09090 ANIA_10164 ANIA_10406 ANIA_11250
0.00529446	20	45	2.09896	Ribonucleoprotein complex binding	http://amigo.geneontology.org/amigo/term/GO:0043021	ANIA_01256 ANIA_01366 ANIA_01367 ANIA_02775 ANIA_03055 ANIA_03096 ANIA_03427 ANIA_03827 ANIA_04015 ANIA_04163 ANIA_04469 ANIA_04695 ANIA_05719 ANIA_06651 ANIA_07143 ANIA_07350 ANIA_07721 ANIA_10170 ANIA_10205 ANIA_10315
0.00553133	35	96	1.72181	RNA catabolic process	http://amigo.geneontology.org/amigo/term/GO:0006401	ANIA_00242 ANIA_00258 ANIA_00282 ANIA_00406 ANIA_00707 ANIA_02153 ANIA_03411 ANIA_03657 ANIA_03739 ANIA_03812 ANIA_04000 ANIA_04412 ANIA_04617 ANIA_04631 ANIA_04958 ANIA_05114 ANIA_05337 ANIA_05694 ANIA_05931 ANIA_06111 ANIA_06244 ANIA_06507 ANIA_06540 ANIA_06587 ANIA_06600 ANIA_06895 ANIA_06902 ANIA_07474 ANIA_07492 ANIA_07493 ANIA_08038 ANIA_09090 ANIA_10164 ANIA_10406 ANIA_11250
0.00553307	10	16	2.95167	RNA polymerase	http://www.genome.jp/kegg-bin/show_pathway?ani03020	ANIA_01447 ANIA_02135 ANIA_02283 ANIA_02415 ANIA_02747 ANIA_03933 ANIA_06558 ANIA_08272 ANIA_09102 ANIA_10315
0.00554541	50	151	1.5638	Organelle fission	http://amigo.geneontology.org/amigo/term/GO:0048285	ANIA_00316 ANIA_00676 ANIA_00715 ANIA_00808 ANIA_00848 ANIA_00905 ANIA_01182 ANIA_01223 ANIA_01286 ANIA_01322 ANIA_01560 ANIA_02068 ANIA_02128 ANIA_02160 ANIA_02511 ANIA_02927 ANIA_02963 ANIA_03910 ANIA_03941 ANIA_03946 ANIA_04265 ANIA_04513 ANIA_04597 ANIA_04735 ANIA_04752 ANIA_04969 ANIA_05057 ANIA_05115 ANIA_05133 ANIA_05406 ANIA_05428 ANIA_05495 ANIA_05717 ANIA_05829 ANIA_05881 ANIA_05899 ANI…
0.00559083	31	82	1.7854	Catalytic activity, acting on a tRNA	http://amigo.geneontology.org/amigo/term/GO:0140101	ANIA_00130 ANIA_00141 ANIA_00189 ANIA_00190 ANIA_00502 ANIA_00757 ANIA_00818 ANIA_00956 ANIA_01201 ANIA_01709 ANIA_01710 ANIA_01751 ANIA_02190 ANIA_02735 ANIA_03603 ANIA_03652 ANIA_03702 ANIA_04067 ANIA_04631 ANIA_06526 ANIA_07028 ANIA_08066 ANIA_08214 ANIA_08653 ANIA_08799 ANIA_09406 ANIA_10249 ANIA_10353 ANIA_10361 ANIA_10451 ANIA_10474
0.00561772	5	5	4.72267	MRNA modification	http://amigo.geneontology.org/amigo/term/GO:0016556	ANIA_00072 ANIA_00247 ANIA_03170 ANIA_06165 ANIA_08851
0.00561772	5	5	4.72267	Peptidyl-asparagine modification	http://amigo.geneontology.org/amigo/term/GO:0018196	ANIA_01455 ANIA_04623 ANIA_04683 ANIA_07426 ANIA_07472
0.00561772	5	5	4.72267	Protein N-linked glycosylation via asparagine	http://amigo.geneontology.org/amigo/term/GO:0018279	ANIA_01455 ANIA_04623 ANIA_04683 ANIA_07426 ANIA_07472
0.00561772	5	5	4.72267	de novo UMP biosynthetic process	http://amigo.geneontology.org/amigo/term/GO:0044205	ANIA_00565 ANIA_05884 ANIA_05909 ANIA_06157 ANIA_10131
0.00561772	5	5	4.72267	Deoxyribose phosphate biosynthetic process	http://amigo.geneontology.org/amigo/term/GO:0046385	ANIA_00067 ANIA_00271 ANIA_07028 ANIA_07429 ANIA_08213
0.00561772	5	5	4.72267	RRNA transport	http://amigo.geneontology.org/amigo/term/GO:0051029	ANIA_00843 ANIA_03172 ANIA_03413 ANIA_04087 ANIA_06978
0.00561772	5	5	4.72267	Alpha DNA polymerase:primase complex	http://amigo.geneontology.org/amigo/term/GO:0005658	ANIA_00260 ANIA_03033 ANIA_06687 ANIA_10755 ANIA_10855
0.00561772	5	5	4.72267	Nuclear pore outer ring	http://amigo.geneontology.org/amigo/term/GO:0031080	ANIA_01190 ANIA_04293 ANIA_04317 ANIA_05889 ANIA_09109
0.00561772	5	5	4.72267	RRNA export from nucleus	http://amigo.geneontology.org/amigo/term/GO:0006407	ANIA_00843 ANIA_03172 ANIA_03413 ANIA_04087 ANIA_06978
0.00561772	5	5	4.72267	Pyrimidine deoxyribonucleotide metabolic process	http://amigo.geneontology.org/amigo/term/GO:0009219	ANIA_00067 ANIA_00271 ANIA_07028 ANIA_07429 ANIA_08213
0.00561772	5	5	4.72267	Pyrimidine deoxyribonucleotide biosynthetic process	http://amigo.geneontology.org/amigo/term/GO:0009221	ANIA_00067 ANIA_00271 ANIA_07028 ANIA_07429 ANIA_08213
0.00561772	5	5	4.72267	2 -deoxyribonucleotide biosynthetic process	http://amigo.geneontology.org/amigo/term/GO:0009265	ANIA_00067 ANIA_00271 ANIA_07028 ANIA_07429 ANIA_08213
0.00593616	7	9	3.67319	Endonucleolytic cleavage to generate mature 5 -end of SSU-rRNA from (SSU-rRNA, 5.8S rRNA, LSU-rRNA)	http://amigo.geneontology.org/amigo/term/GO:0000472	ANIA_00421 ANIA_03167 ANIA_04460 ANIA_05785 ANIA_06334 ANIA_07305 ANIA_10618
0.00593616	7	9	3.67319	Nuclear-transcribed mRNA catabolic process, exonucleolytic, 3 -5	http://amigo.geneontology.org/amigo/term/GO:0034427	ANIA_02153 ANIA_03812 ANIA_04617 ANIA_06111 ANIA_06244 ANIA_10406 ANIA_11250
0.00593616	34	93	1.72657	Golgi membrane	http://amigo.geneontology.org/amigo/term/GO:0000139	ANIA_00261 ANIA_00367 ANIA_00551 ANIA_00787 ANIA_00922 ANIA_01177 ANIA_01272 ANIA_01620 ANIA_02222 ANIA_02518 ANIA_02626 ANIA_02738 ANIA_03026 ANIA_03080 ANIA_03720 ANIA_03733 ANIA_04068 ANIA_04165 ANIA_04317 ANIA_04547 ANIA_05748 ANIA_05915 ANIA_05972 ANIA_06080 ANIA_06257 ANIA_06307 ANIA_07302 ANIA_07464 ANIA_07534 ANIA_07679 ANIA_08848 ANIA_09298 ANIA_10313 ANIA_11141
0.00593616	34	93	1.72657	Endonuclease activity	http://amigo.geneontology.org/amigo/term/GO:0004519	ANIA_00189 ANIA_00190 ANIA_00242 ANIA_00258 ANIA_00392 ANIA_00997 ANIA_01351 ANIA_01474 ANIA_01723 ANIA_02185 ANIA_02457 ANIA_02847 ANIA_03035 ANIA_03652 ANIA_03657 ANIA_03812 ANIA_03947 ANIA_04067 ANIA_04087 ANIA_04509 ANIA_04631 ANIA_04958 ANIA_04964 ANIA_04994 ANIA_05040 ANIA_05114 ANIA_05408 ANIA_06111 ANIA_06682 ANIA_06822 ANIA_08212 ANIA_08253 ANIA_08794 ANIA_10555
0.00605836	354	1442	1.15938	Hydrolase activity	http://amigo.geneontology.org/amigo/term/GO:0016787	ANIA_00009 ANIA_00030 ANIA_00044 ANIA_00050 ANIA_00118 ANIA_00126 ANIA_00133 ANIA_00182 ANIA_00189 ANIA_00190 ANIA_00193 ANIA_00194 ANIA_00204 ANIA_00221 ANIA_00228 ANIA_00242 ANIA_00258 ANIA_00271 ANIA_00316 ANIA_00327 ANIA_00383 ANIA_00392 ANIA_00395 ANIA_00404 ANIA_00449 ANIA_00549 ANIA_00551 ANIA_00565 ANIA_00579 ANIA_00583 ANIA_00589 ANIA_00637 ANIA_00676 ANIA_00707 ANIA_00747 ANIA_00750 ANI…
0.0063759	6	7	4.048	Deoxyribose phosphate metabolic process	http://amigo.geneontology.org/amigo/term/GO:0019692	ANIA_00067 ANIA_00271 ANIA_01202 ANIA_07028 ANIA_07429 ANIA_08213
0.0063759	11	19	2.73418	DNA strand elongation	http://amigo.geneontology.org/amigo/term/GO:0022616	ANIA_02491 ANIA_02969 ANIA_03067 ANIA_05992 ANIA_06070 ANIA_06517 ANIA_06895 ANIA_07325 ANIA_10470 ANIA_10497 ANIA_10755
0.0063759	6	7	4.048	Transcription-dependent tethering of RNA polymerase II gene DNA at nuclear periphery	http://amigo.geneontology.org/amigo/term/GO:0000972	ANIA_01190 ANIA_01379 ANIA_04293 ANIA_05337 ANIA_05627 ANIA_06738
0.0063759	35	97	1.70406	Regulation of cellular amide metabolic process	http://amigo.geneontology.org/amigo/term/GO:0034248	ANIA_00406 ANIA_00807 ANIA_00974 ANIA_01157 ANIA_01256 ANIA_02775 ANIA_03055 ANIA_03411 ANIA_03413 ANIA_04000 ANIA_04015 ANIA_04163 ANIA_04202 ANIA_04470 ANIA_04617 ANIA_04695 ANIA_04803 ANIA_05111 ANIA_05164 ANIA_06111 ANIA_06244 ANIA_06587 ANIA_06651 ANIA_07474 ANIA_07492 ANIA_07554 ANIA_09090 ANIA_09093 ANIA_10173 ANIA_10182 ANIA_10224 ANIA_10248 ANIA_10315 ANIA_10406 ANIA_10417
0.0063759	6	7	4.048	Primary alcohol catabolic process	http://amigo.geneontology.org/amigo/term/GO:0034310	ANIA_00554 ANIA_05226 ANIA_08978 ANIA_08979 ANIA_08980 ANIA_08981
0.0063759	6	7	4.048	U4 snRNA 3 -end processing	http://amigo.geneontology.org/amigo/term/GO:0034475	ANIA_02153 ANIA_03812 ANIA_04617 ANIA_06111 ANIA_06244 ANIA_10406
0.0063759	6	7	4.048	UMP metabolic process	http://amigo.geneontology.org/amigo/term/GO:0046049	ANIA_00565 ANIA_05884 ANIA_05909 ANIA_06157 ANIA_07502 ANIA_10131
0.0063759	6	7	4.048	Ethanol catabolic process	http://amigo.geneontology.org/amigo/term/GO:0006068	ANIA_00554 ANIA_05226 ANIA_08978 ANIA_08979 ANIA_08980 ANIA_08981
0.0063759	6	7	4.048	UMP biosynthetic process	http://amigo.geneontology.org/amigo/term/GO:0006222	ANIA_00565 ANIA_05884 ANIA_05909 ANIA_06157 ANIA_07502 ANIA_10131
0.0063759	11	19	2.73418	DNA strand elongation involved in DNA replication	http://amigo.geneontology.org/amigo/term/GO:0006271	ANIA_02491 ANIA_02969 ANIA_03067 ANIA_05992 ANIA_06070 ANIA_06517 ANIA_06895 ANIA_07325 ANIA_10470 ANIA_10497 ANIA_10755
0.0063759	6	7	4.048	COPI vesicle coat	http://amigo.geneontology.org/amigo/term/GO:0030126	ANIA_00922 ANIA_01177 ANIA_03026 ANIA_04547 ANIA_05972 ANIA_06080
0.0063759	6	7	4.048	COPI-coated vesicle	http://amigo.geneontology.org/amigo/term/GO:0030137	ANIA_00922 ANIA_01177 ANIA_03026 ANIA_04547 ANIA_05972 ANIA_06080
0.0063759	6	7	4.048	COPI-coated vesicle membrane	http://amigo.geneontology.org/amigo/term/GO:0030663	ANIA_00922 ANIA_01177 ANIA_03026 ANIA_04547 ANIA_05972 ANIA_06080
0.0063759	6	7	4.048	NLS-bearing protein import into nucleus	http://amigo.geneontology.org/amigo/term/GO:0006607	ANIA_00906 ANIA_00926 ANIA_01064 ANIA_02120 ANIA_02142 ANIA_05717
0.0063759	6	7	4.048	Single-stranded DNA helicase activity	http://amigo.geneontology.org/amigo/term/GO:0017116	ANIA_00228 ANIA_02491 ANIA_05992 ANIA_06070 ANIA_06895 ANIA_07994
0.0063759	6	7	4.048	Pyrimidine nucleoside triphosphate metabolic process	http://amigo.geneontology.org/amigo/term/GO:0009147	ANIA_00271 ANIA_00490 ANIA_00565 ANIA_07028 ANIA_08213 ANIA_08216
0.0063759	6	7	4.048	Pyrimidine ribonucleoside monophosphate metabolic process	http://amigo.geneontology.org/amigo/term/GO:0009173	ANIA_00565 ANIA_05884 ANIA_05909 ANIA_06157 ANIA_07502 ANIA_10131
0.0063759	6	7	4.048	Pyrimidine ribonucleoside monophosphate biosynthetic process	http://amigo.geneontology.org/amigo/term/GO:0009174	ANIA_00565 ANIA_05884 ANIA_05909 ANIA_06157 ANIA_07502 ANIA_10131
0.0063759	6	7	4.048	2 -deoxyribonucleotide metabolic process	http://amigo.geneontology.org/amigo/term/GO:0009394	ANIA_00067 ANIA_00271 ANIA_01202 ANIA_07028 ANIA_07429 ANIA_08213
0.00667354	20	46	2.05333	Cytokinesis	http://amigo.geneontology.org/amigo/term/GO:0000910	ANIA_00676 ANIA_01394 ANIA_01560 ANIA_02128 ANIA_02687 ANIA_04667 ANIA_05057 ANIA_05666 ANIA_05686 ANIA_05815 ANIA_06688 ANIA_06732 ANIA_07032 ANIA_07576 ANIA_08182 ANIA_08244 ANIA_08862 ANIA_09463 ANIA_10595 ANIA_10635
0.00707966	23	56	1.93967	Regulation of mitotic cell cycle phase transition	http://amigo.geneontology.org/amigo/term/GO:1901990	ANIA_00872 ANIA_00905 ANIA_01207 ANIA_02511 ANIA_02927 ANIA_02969 ANIA_03941 ANIA_03946 ANIA_04182 ANIA_04571 ANIA_04735 ANIA_05057 ANIA_05133 ANIA_05495 ANIA_05676 ANIA_05717 ANIA_05881 ANIA_06616 ANIA_06896 ANIA_06978 ANIA_08013 ANIA_10433 ANIA_10434
0.00713679	28	73	1.81143	MRNA catabolic process	http://amigo.geneontology.org/amigo/term/GO:0006402	ANIA_00282 ANIA_00406 ANIA_00707 ANIA_02153 ANIA_03411 ANIA_03657 ANIA_03739 ANIA_03812 ANIA_04000 ANIA_04617 ANIA_04631 ANIA_05337 ANIA_05694 ANIA_05931 ANIA_06111 ANIA_06244 ANIA_06507 ANIA_06540 ANIA_06587 ANIA_06600 ANIA_06902 ANIA_07474 ANIA_07492 ANIA_08038 ANIA_09090 ANIA_10164 ANIA_10406 ANIA_11250
0.00725607	9	14	3.036	Sno(s)RNA 3 -end processing	http://amigo.geneontology.org/amigo/term/GO:0031126	ANIA_00745 ANIA_02153 ANIA_03812 ANIA_04617 ANIA_05694 ANIA_08276 ANIA_08851 ANIA_10406 ANIA_11066
0.00730147	12	22	2.576	Primary alcohol metabolic process	http://amigo.geneontology.org/amigo/term/GO:0034308	ANIA_00554 ANIA_02548 ANIA_03132 ANIA_05226 ANIA_07632 ANIA_08396 ANIA_08978 ANIA_08979 ANIA_08980 ANIA_08981 ANIA_10472 ANIA_10762
0.00737658	67	219	1.44483	Endoplasmic reticulum membrane	http://amigo.geneontology.org/amigo/term/GO:0005789	ANIA_00104 ANIA_00261 ANIA_00417 ANIA_00636 ANIA_00834 ANIA_00851 ANIA_01165 ANIA_01382 ANIA_01455 ANIA_01459 ANIA_01525 ANIA_01771 ANIA_01775 ANIA_02140 ANIA_02240 ANIA_02738 ANIA_03080 ANIA_03370 ANIA_03592 ANIA_03720 ANIA_03817 ANIA_03826 ANIA_03833 ANIA_04068 ANIA_04165 ANIA_04235 ANIA_04317 ANIA_04446 ANIA_04465 ANIA_04589 ANIA_04683 ANIA_04728 ANIA_04761 ANIA_04864 ANIA_05000 ANIA_05850 ANI…
0.00793526	27	70	1.8216	Nuclear DNA-directed RNA polymerase complex	http://amigo.geneontology.org/amigo/term/GO:0055029	ANIA_00192 ANIA_00260 ANIA_00292 ANIA_00321 ANIA_00752 ANIA_00794 ANIA_01369 ANIA_01447 ANIA_02135 ANIA_02283 ANIA_02415 ANIA_02747 ANIA_02850 ANIA_03033 ANIA_03166 ANIA_03933 ANIA_05910 ANIA_06558 ANIA_06687 ANIA_07608 ANIA_08272 ANIA_09102 ANIA_09125 ANIA_10755 ANIA_10855 ANIA_10970 ANIA_11183
0.00803767	29	77	1.77867	Mitotic cell cycle phase transition	http://amigo.geneontology.org/amigo/term/GO:0044772	ANIA_00808 ANIA_00872 ANIA_00905 ANIA_01207 ANIA_01560 ANIA_02137 ANIA_02511 ANIA_02927 ANIA_02969 ANIA_03795 ANIA_03941 ANIA_03946 ANIA_04182 ANIA_04571 ANIA_04735 ANIA_05057 ANIA_05133 ANIA_05495 ANIA_05676 ANIA_05717 ANIA_05881 ANIA_06616 ANIA_06715 ANIA_06896 ANIA_06978 ANIA_08013 ANIA_08805 ANIA_10433 ANIA_10434
0.00805799	16	34	2.22243	GPI anchor metabolic process	http://amigo.geneontology.org/amigo/term/GO:0006505	ANIA_00367 ANIA_00636 ANIA_01775 ANIA_02096 ANIA_02240 ANIA_03370 ANIA_03826 ANIA_04235 ANIA_04495 ANIA_06496 ANIA_06589 ANIA_07049 ANIA_10118 ANIA_10439 ANIA_10639 ANIA_11232
0.00805799	16	34	2.22243	GPI anchor biosynthetic process	http://amigo.geneontology.org/amigo/term/GO:0006506	ANIA_00367 ANIA_00636 ANIA_01775 ANIA_02096 ANIA_02240 ANIA_03370 ANIA_03826 ANIA_04235 ANIA_04495 ANIA_06496 ANIA_06589 ANIA_07049 ANIA_10118 ANIA_10439 ANIA_10639 ANIA_11232
0.00841717	68	224	1.43367	Nuclear outer membrane-endoplasmic reticulum membrane network	http://amigo.geneontology.org/amigo/term/GO:0042175	ANIA_00104 ANIA_00261 ANIA_00417 ANIA_00636 ANIA_00753 ANIA_00834 ANIA_00851 ANIA_01165 ANIA_01382 ANIA_01455 ANIA_01459 ANIA_01525 ANIA_01771 ANIA_01775 ANIA_02140 ANIA_02240 ANIA_02738 ANIA_03080 ANIA_03370 ANIA_03592 ANIA_03720 ANIA_03817 ANIA_03826 ANIA_03833 ANIA_04068 ANIA_04165 ANIA_04235 ANIA_04317 ANIA_04446 ANIA_04465 ANIA_04589 ANIA_04683 ANIA_04728 ANIA_04761 ANIA_04864 ANIA_05000 ANI…
0.00897579	28	74	1.78696	Protein import	http://amigo.geneontology.org/amigo/term/GO:0017038	ANIA_00559 ANIA_00906 ANIA_00926 ANIA_01064 ANIA_01190 ANIA_01223 ANIA_01379 ANIA_01892 ANIA_02086 ANIA_02120 ANIA_02142 ANIA_02431 ANIA_03375 ANIA_04293 ANIA_04499 ANIA_05482 ANIA_05627 ANIA_05717 ANIA_06006 ANIA_06143 ANIA_06248 ANIA_06510 ANIA_06591 ANIA_06738 ANIA_07721 ANIA_07731 ANIA_09109 ANIA_10112
0.00941877	10	17	2.77804	Protein folding chaperone	http://amigo.geneontology.org/amigo/term/GO:0044183	ANIA_00381 ANIA_01851 ANIA_01904 ANIA_02062 ANIA_02149 ANIA_02918 ANIA_03070 ANIA_03134 ANIA_04616 ANIA_05713
0.00965479	70	233	1.41883	Intracellular protein transport	http://amigo.geneontology.org/amigo/term/GO:0006886	ANIA_00261 ANIA_00417 ANIA_00559 ANIA_00747 ANIA_00834 ANIA_00906 ANIA_00926 ANIA_01064 ANIA_01154 ANIA_01177 ANIA_01190 ANIA_01223 ANIA_01272 ANIA_01282 ANIA_01379 ANIA_01525 ANIA_01892 ANIA_01940 ANIA_01980 ANIA_02062 ANIA_02086 ANIA_02120 ANIA_02140 ANIA_02142 ANIA_02431 ANIA_02518 ANIA_03026 ANIA_03029 ANIA_03080 ANIA_03094 ANIA_03375 ANIA_03720 ANIA_04165 ANIA_04293 ANIA_04446 ANIA_04463 ANI…
0.0096803	51	159	1.51482	Heterocycle catabolic process	http://amigo.geneontology.org/amigo/term/GO:0046700	ANIA_00242 ANIA_00258 ANIA_00271 ANIA_00282 ANIA_00406 ANIA_00707 ANIA_01115 ANIA_01202 ANIA_01263 ANIA_01823 ANIA_01857 ANIA_02153 ANIA_02185 ANIA_02938 ANIA_03411 ANIA_03591 ANIA_03657 ANIA_03739 ANIA_03812 ANIA_04000 ANIA_04075 ANIA_04412 ANIA_04617 ANIA_04631 ANIA_04958 ANIA_04964 ANIA_05068 ANIA_05114 ANIA_05337 ANIA_05694 ANIA_05931 ANIA_05939 ANIA_06111 ANIA_06244 ANIA_06507 ANIA_06540 ANI…
0.00971592	19	44	2.03933	RNA 3 -end processing	http://amigo.geneontology.org/amigo/term/GO:0031123	ANIA_00745 ANIA_01456 ANIA_02153 ANIA_02850 ANIA_03082 ANIA_03172 ANIA_03657 ANIA_03812 ANIA_03823 ANIA_04617 ANIA_05694 ANIA_06111 ANIA_06160 ANIA_06244 ANIA_08276 ANIA_08851 ANIA_10406 ANIA_11066 ANIA_11250
0.00982515	31	85	1.72239	Regulation of mitotic cell cycle	http://amigo.geneontology.org/amigo/term/GO:0007346	ANIA_00676 ANIA_00808 ANIA_00872 ANIA_00905 ANIA_01207 ANIA_02511 ANIA_02927 ANIA_02969 ANIA_03941 ANIA_03946 ANIA_04182 ANIA_04279 ANIA_04571 ANIA_04735 ANIA_05057 ANIA_05133 ANIA_05406 ANIA_05495 ANIA_05674 ANIA_05676 ANIA_05717 ANIA_05881 ANIA_06339 ANIA_06616 ANIA_06896 ANIA_06978 ANIA_08013 ANIA_08836 ANIA_10433 ANIA_10434 ANIA_11032
0.0101777	8	12	3.14845	Spindle midzone	http://amigo.geneontology.org/amigo/term/GO:0051233	ANIA_00926 ANIA_02128 ANIA_02862 ANIA_04513 ANIA_05057 ANIA_05815 ANIA_06978 ANIA_08286
0.0101777	8	12	3.14845	Nuclear-transcribed mRNA catabolic process, exonucleolytic	http://amigo.geneontology.org/amigo/term/GO:0000291	ANIA_00707 ANIA_02153 ANIA_03812 ANIA_04617 ANIA_06111 ANIA_06244 ANIA_10406 ANIA_11250
0.0102806	40	118	1.6009	Regulation of cell cycle process	http://amigo.geneontology.org/amigo/term/GO:0010564	ANIA_00676 ANIA_00807 ANIA_00808 ANIA_00872 ANIA_00905 ANIA_01207 ANIA_01359 ANIA_01560 ANIA_01661 ANIA_02059 ANIA_02511 ANIA_02687 ANIA_02927 ANIA_02969 ANIA_03620 ANIA_03941 ANIA_03946 ANIA_04182 ANIA_04279 ANIA_04571 ANIA_04735 ANIA_05028 ANIA_05057 ANIA_05102 ANIA_05133 ANIA_05406 ANIA_05495 ANIA_05666 ANIA_05676 ANIA_05717 ANIA_05815 ANIA_05881 ANIA_06243 ANIA_06616 ANIA_06896 ANIA_06978 ANI…
0.0102806	54	171	1.49137	Cellular nitrogen compound catabolic process	http://amigo.geneontology.org/amigo/term/GO:0044270	ANIA_00242 ANIA_00258 ANIA_00271 ANIA_00282 ANIA_00406 ANIA_00418 ANIA_00707 ANIA_01115 ANIA_01202 ANIA_01263 ANIA_01823 ANIA_01857 ANIA_02153 ANIA_02185 ANIA_02938 ANIA_03411 ANIA_03591 ANIA_03657 ANIA_03739 ANIA_03812 ANIA_03957 ANIA_04000 ANIA_04075 ANIA_04412 ANIA_04617 ANIA_04631 ANIA_04958 ANIA_04964 ANIA_05068 ANIA_05114 ANIA_05337 ANIA_05694 ANIA_05931 ANIA_05939 ANIA_06111 ANIA_06244 ANI…
0.0107594	11	20	2.59747	Positive regulation of translation	http://amigo.geneontology.org/amigo/term/GO:0045727	ANIA_01256 ANIA_03413 ANIA_04000 ANIA_04015 ANIA_04470 ANIA_04695 ANIA_04803 ANIA_05111 ANIA_05164 ANIA_09093 ANIA_10315
0.0107594	11	20	2.59747	Microtubule-based transport	http://amigo.geneontology.org/amigo/term/GO:0099111	ANIA_00118 ANIA_00316 ANIA_00420 ANIA_01182 ANIA_01454 ANIA_01953 ANIA_04664 ANIA_05829 ANIA_06125 ANIA_07570 ANIA_10627
0.0107594	11	20	2.59747	Methyltransferase complex	http://amigo.geneontology.org/amigo/term/GO:0034708	ANIA_00808 ANIA_02735 ANIA_02850 ANIA_03603 ANIA_06677 ANIA_07553 ANIA_08066 ANIA_08211 ANIA_08668 ANIA_08799 ANIA_10451
0.0109629	21	51	1.94463	Unfolded protein binding	http://amigo.geneontology.org/amigo/term/GO:0051082	ANIA_00381 ANIA_00862 ANIA_01205 ANIA_01851 ANIA_01904 ANIA_01940 ANIA_02062 ANIA_02149 ANIA_02918 ANIA_03070 ANIA_03134 ANIA_03592 ANIA_04616 ANIA_04623 ANIA_05713 ANIA_05785 ANIA_06170 ANIA_06248 ANIA_06630 ANIA_06736 ANIA_07205
0.0119241	15	32	2.21375	Ribonucleoside monophosphate metabolic process	http://amigo.geneontology.org/amigo/term/GO:0009161	ANIA_00259 ANIA_00565 ANIA_01965 ANIA_04464 ANIA_05566 ANIA_05884 ANIA_05909 ANIA_06157 ANIA_06209 ANIA_06541 ANIA_06711 ANIA_06993 ANIA_07502 ANIA_10131 ANIA_10188
0.0126777	89	312	1.34717	Transferase complex	http://amigo.geneontology.org/amigo/term/GO:1990234	ANIA_00192 ANIA_00260 ANIA_00292 ANIA_00321 ANIA_00327 ANIA_00636 ANIA_00752 ANIA_00794 ANIA_00808 ANIA_00814 ANIA_00883 ANIA_00905 ANIA_01208 ANIA_01369 ANIA_01447 ANIA_01455 ANIA_01459 ANIA_01620 ANIA_01965 ANIA_02135 ANIA_02137 ANIA_02240 ANIA_02283 ANIA_02415 ANIA_02626 ANIA_02717 ANIA_02735 ANIA_02747 ANIA_02772 ANIA_02850 ANIA_02935 ANIA_03033 ANIA_03067 ANIA_03166 ANIA_03169 ANIA_03370 ANI…
0.0135279	67	224	1.41258	Endoplasmic reticulum subcompartment	http://amigo.geneontology.org/amigo/term/GO:0098827	ANIA_00104 ANIA_00261 ANIA_00417 ANIA_00636 ANIA_00834 ANIA_00851 ANIA_01165 ANIA_01382 ANIA_01455 ANIA_01459 ANIA_01525 ANIA_01771 ANIA_01775 ANIA_02140 ANIA_02240 ANIA_02738 ANIA_03080 ANIA_03370 ANIA_03592 ANIA_03720 ANIA_03817 ANIA_03826 ANIA_03833 ANIA_04068 ANIA_04165 ANIA_04235 ANIA_04317 ANIA_04446 ANIA_04465 ANIA_04589 ANIA_04683 ANIA_04728 ANIA_04761 ANIA_04864 ANIA_05000 ANIA_05850 ANI…
0.0135612	30	83	1.70699	Ribose phosphate biosynthetic process	http://amigo.geneontology.org/amigo/term/GO:0046390	ANIA_00259 ANIA_00357 ANIA_00490 ANIA_00565 ANIA_01523 ANIA_01624 ANIA_01965 ANIA_02315 ANIA_02435 ANIA_02436 ANIA_03169 ANIA_04464 ANIA_05162 ANIA_05566 ANIA_05626 ANIA_05884 ANIA_05909 ANIA_06157 ANIA_06209 ANIA_06541 ANIA_06708 ANIA_06711 ANIA_06993 ANIA_07502 ANIA_07754 ANIA_08216 ANIA_09446 ANIA_10131 ANIA_10188 ANIA_10626
0.013695	9	15	2.8336	Conidiophore development	http://amigo.geneontology.org/amigo/term/GO:0070787	ANIA_00118 ANIA_01359 ANIA_01459 ANIA_03113 ANIA_04667 ANIA_05836 ANIA_06150 ANIA_06688 ANIA_08244
0.013695	9	15	2.8336	RRNA methyltransferase activity	http://amigo.geneontology.org/amigo/term/GO:0008649	ANIA_00092 ANIA_00745 ANIA_01957 ANIA_03313 ANIA_05789 ANIA_05871 ANIA_08073 ANIA_08849 ANIA_08855
0.013695	9	15	2.8336	Catalytic activity, acting on a rRNA	http://amigo.geneontology.org/amigo/term/GO:0140102	ANIA_00092 ANIA_00745 ANIA_01957 ANIA_03313 ANIA_05789 ANIA_05871 ANIA_08073 ANIA_08849 ANIA_08855
0.0139297	7	10	3.30587	Mitotic DNA replication checkpoint signaling	http://amigo.geneontology.org/amigo/term/GO:0033314	ANIA_01207 ANIA_02969 ANIA_04571 ANIA_05676 ANIA_06616 ANIA_06896 ANIA_10434
0.0139297	7	10	3.30587	Septin ring	http://amigo.geneontology.org/amigo/term/GO:0005940	ANIA_01394 ANIA_04667 ANIA_04706 ANIA_06150 ANIA_06688 ANIA_08182 ANIA_10595
0.0139297	7	10	3.30587	Golgi-associated vesicle membrane	http://amigo.geneontology.org/amigo/term/GO:0030660	ANIA_00922 ANIA_01177 ANIA_03026 ANIA_04463 ANIA_04547 ANIA_05972 ANIA_06080
0.0155487	42	128	1.54963	Nuclease activity	http://amigo.geneontology.org/amigo/term/GO:0004518	ANIA_00189 ANIA_00190 ANIA_00242 ANIA_00258 ANIA_00392 ANIA_00707 ANIA_00997 ANIA_01351 ANIA_01474 ANIA_01723 ANIA_02185 ANIA_02457 ANIA_02847 ANIA_03035 ANIA_03067 ANIA_03652 ANIA_03657 ANIA_03812 ANIA_03947 ANIA_04067 ANIA_04087 ANIA_04509 ANIA_04617 ANIA_04631 ANIA_04958 ANIA_04964 ANIA_04994 ANIA_05040 ANIA_05114 ANIA_05408 ANIA_06111 ANIA_06583 ANIA_06682 ANIA_06822 ANIA_07325 ANIA_08212 ANI…
0.0158873	20	49	1.92762	Single-stranded DNA binding	http://amigo.geneontology.org/amigo/term/GO:0003697	ANIA_00126 ANIA_00228 ANIA_00260 ANIA_00872 ANIA_01564 ANIA_02141 ANIA_02491 ANIA_02847 ANIA_03033 ANIA_04959 ANIA_05992 ANIA_06070 ANIA_06583 ANIA_06891 ANIA_06895 ANIA_07309 ANIA_07994 ANIA_08272 ANIA_10497 ANIA_10755
0.0160145	57	186	1.44727	Organic cyclic compound catabolic process	http://amigo.geneontology.org/amigo/term/GO:1901361	ANIA_00242 ANIA_00258 ANIA_00271 ANIA_00282 ANIA_00406 ANIA_00707 ANIA_01115 ANIA_01202 ANIA_01263 ANIA_01809 ANIA_01823 ANIA_01857 ANIA_01895 ANIA_01896 ANIA_02153 ANIA_02185 ANIA_02938 ANIA_03411 ANIA_03591 ANIA_03657 ANIA_03739 ANIA_03812 ANIA_04000 ANIA_04009 ANIA_04075 ANIA_04412 ANIA_04617 ANIA_04631 ANIA_04958 ANIA_04964 ANIA_05068 ANIA_05114 ANIA_05337 ANIA_05694 ANIA_05931 ANIA_05939 ANI…
0.016049	10	18	2.62371	Poly(A)+ mRNA export from nucleus	http://amigo.geneontology.org/amigo/term/GO:0016973	ANIA_00282 ANIA_01157 ANIA_01379 ANIA_03657 ANIA_03739 ANIA_05337 ANIA_06651 ANIA_06978 ANIA_08038 ANIA_11250
0.016049	16	36	2.09896	Microtubule associated complex	http://amigo.geneontology.org/amigo/term/GO:0005875	ANIA_00118 ANIA_00420 ANIA_01454 ANIA_01953 ANIA_03124 ANIA_03185 ANIA_03589 ANIA_03721 ANIA_04513 ANIA_04664 ANIA_05815 ANIA_06125 ANIA_06340 ANIA_06863 ANIA_06875 ANIA_08286
0.0168471	40	121	1.56121	Transferase complex, transferring phosphorus-containing groups	http://amigo.geneontology.org/amigo/term/GO:0061695	ANIA_00192 ANIA_00260 ANIA_00292 ANIA_00321 ANIA_00752 ANIA_00794 ANIA_01369 ANIA_01447 ANIA_01965 ANIA_02135 ANIA_02137 ANIA_02283 ANIA_02415 ANIA_02717 ANIA_02747 ANIA_02850 ANIA_03033 ANIA_03067 ANIA_03166 ANIA_03169 ANIA_03795 ANIA_03933 ANIA_04182 ANIA_05910 ANIA_06558 ANIA_06687 ANIA_06711 ANIA_06822 ANIA_07325 ANIA_07608 ANIA_07609 ANIA_08272 ANIA_09102 ANIA_09125 ANIA_10470 ANIA_10640 ANI…
0.0172933	19	46	1.95067	Protein methylation	http://amigo.geneontology.org/amigo/term/GO:0006479	ANIA_00134 ANIA_00288 ANIA_00745 ANIA_01170 ANIA_01445 ANIA_01905 ANIA_02557 ANIA_03096 ANIA_05998 ANIA_06072 ANIA_06162 ANIA_06568 ANIA_06677 ANIA_07340 ANIA_08825 ANIA_10189 ANIA_10526 ANIA_10583 ANIA_10721
0.0172933	19	46	1.95067	Protein alkylation	http://amigo.geneontology.org/amigo/term/GO:0008213	ANIA_00134 ANIA_00288 ANIA_00745 ANIA_01170 ANIA_01445 ANIA_01905 ANIA_02557 ANIA_03096 ANIA_05998 ANIA_06072 ANIA_06162 ANIA_06568 ANIA_06677 ANIA_07340 ANIA_08825 ANIA_10189 ANIA_10526 ANIA_10583 ANIA_10721
0.0174014	11	21	2.47378	Nuclear membrane	http://amigo.geneontology.org/amigo/term/GO:0031965	ANIA_00676 ANIA_00906 ANIA_00926 ANIA_01190 ANIA_01771 ANIA_02120 ANIA_03910 ANIA_05717 ANIA_07182 ANIA_07731 ANIA_09109
0.0175683	14	30	2.20391	Peptide binding	http://amigo.geneontology.org/amigo/term/GO:0042277	ANIA_00559 ANIA_00906 ANIA_00926 ANIA_02086 ANIA_02120 ANIA_02142 ANIA_02431 ANIA_04467 ANIA_04580 ANIA_05627 ANIA_05717 ANIA_07721 ANIA_07731 ANIA_11226
0.0178887	13	27	2.27388	Cell cycle G2/M phase transition	http://amigo.geneontology.org/amigo/term/GO:0044839	ANIA_00808 ANIA_01207 ANIA_01560 ANIA_02969 ANIA_03941 ANIA_04182 ANIA_04571 ANIA_05676 ANIA_05717 ANIA_06616 ANIA_06896 ANIA_06978 ANIA_10434
0.0178887	13	27	2.27388	G2/M transition of mitotic cell cycle	http://amigo.geneontology.org/amigo/term/GO:0000086	ANIA_00808 ANIA_01207 ANIA_01560 ANIA_02969 ANIA_03941 ANIA_04182 ANIA_04571 ANIA_05676 ANIA_05717 ANIA_06616 ANIA_06896 ANIA_06978 ANIA_10434
0.0178887	13	27	2.27388	Cytoskeletal motor activity	http://amigo.geneontology.org/amigo/term/GO:0003774	ANIA_00118 ANIA_00420 ANIA_03124 ANIA_03721 ANIA_04513 ANIA_04664 ANIA_04706 ANIA_06318 ANIA_06340 ANIA_06863 ANIA_06875 ANIA_08286 ANIA_08862
0.0181522	6	8	3.542	Endonucleolytic cleavage in 5 -ETS of tricistronic rRNA transcript (SSU-rRNA, 5.8S rRNA, LSU-rRNA)	http://amigo.geneontology.org/amigo/term/GO:0000480	ANIA_00421 ANIA_03167 ANIA_04460 ANIA_06334 ANIA_07305 ANIA_10618
0.0181522	6	8	3.542	SnRNA processing	http://amigo.geneontology.org/amigo/term/GO:0016180	ANIA_02153 ANIA_03812 ANIA_04617 ANIA_06111 ANIA_06244 ANIA_10406
0.0181522	6	8	3.542	SnRNA 3 -end processing	http://amigo.geneontology.org/amigo/term/GO:0034472	ANIA_02153 ANIA_03812 ANIA_04617 ANIA_06111 ANIA_06244 ANIA_10406
0.0181522	6	8	3.542	Ribosomal small subunit export from nucleus	http://amigo.geneontology.org/amigo/term/GO:0000056	ANIA_02210 ANIA_02262 ANIA_04087 ANIA_05789 ANIA_06143 ANIA_10618
0.0181522	6	8	3.542	Pseudouridine synthase activity	http://amigo.geneontology.org/amigo/term/GO:0009982	ANIA_00072 ANIA_03170 ANIA_05155 ANIA_06165 ANIA_08851 ANIA_10936
0.0181522	6	8	3.542	Deoxyribonucleotide metabolic process	http://amigo.geneontology.org/amigo/term/GO:0009262	ANIA_00067 ANIA_00271 ANIA_01202 ANIA_07028 ANIA_07429 ANIA_08213
0.0181907	43	133	1.52688	Ribose phosphate metabolic process	http://amigo.geneontology.org/amigo/term/GO:0019693	ANIA_00067 ANIA_00259 ANIA_00357 ANIA_00490 ANIA_00565 ANIA_01202 ANIA_01523 ANIA_01624 ANIA_01888 ANIA_01965 ANIA_02315 ANIA_02334 ANIA_02435 ANIA_02436 ANIA_02938 ANIA_03169 ANIA_03817 ANIA_03869 ANIA_04414 ANIA_04464 ANIA_04923 ANIA_04958 ANIA_05162 ANIA_05210 ANIA_05566 ANIA_05626 ANIA_05884 ANIA_05909 ANIA_06157 ANIA_06209 ANIA_06541 ANIA_06708 ANIA_06711 ANIA_06993 ANIA_07000 ANIA_07502 ANI…
0.0194707	8	13	2.90626	Golgi-associated vesicle	http://amigo.geneontology.org/amigo/term/GO:0005798	ANIA_00922 ANIA_01177 ANIA_03026 ANIA_03122 ANIA_04463 ANIA_04547 ANIA_05972 ANIA_06080
0.0194707	8	13	2.90626	Replisome	http://amigo.geneontology.org/amigo/term/GO:0030894	ANIA_00260 ANIA_01208 ANIA_03033 ANIA_06687 ANIA_07325 ANIA_10470 ANIA_10755 ANIA_10855
0.0194707	8	13	2.90626	Nuclear replisome	http://amigo.geneontology.org/amigo/term/GO:0043601	ANIA_00260 ANIA_01208 ANIA_03033 ANIA_06687 ANIA_07325 ANIA_10470 ANIA_10755 ANIA_10855
0.0194707	8	13	2.90626	N-glycan processing	http://amigo.geneontology.org/amigo/term/GO:0006491	ANIA_00551 ANIA_00787 ANIA_01620 ANIA_02626 ANIA_03733 ANIA_05748 ANIA_07534 ANIA_10702
0.0194707	8	13	2.90626	Protein transporter activity	http://amigo.geneontology.org/amigo/term/GO:0140318	ANIA_00559 ANIA_00834 ANIA_01892 ANIA_04589 ANIA_06306 ANIA_06510 ANIA_07687 ANIA_07721
0.0194946	33	96	1.62342	Cell cycle phase transition	http://amigo.geneontology.org/amigo/term/GO:0044770	ANIA_00676 ANIA_00808 ANIA_00872 ANIA_00905 ANIA_01207 ANIA_01560 ANIA_02137 ANIA_02511 ANIA_02927 ANIA_02969 ANIA_03620 ANIA_03795 ANIA_03941 ANIA_03946 ANIA_04182 ANIA_04279 ANIA_04571 ANIA_04735 ANIA_05057 ANIA_05133 ANIA_05406 ANIA_05495 ANIA_05676 ANIA_05717 ANIA_05881 ANIA_06616 ANIA_06715 ANIA_06896 ANIA_06978 ANIA_08013 ANIA_08805 ANIA_10433 ANIA_10434
0.019688	77	268	1.35689	Organelle subcompartment	http://amigo.geneontology.org/amigo/term/GO:0031984	ANIA_00104 ANIA_00112 ANIA_00261 ANIA_00417 ANIA_00636 ANIA_00834 ANIA_00851 ANIA_01165 ANIA_01382 ANIA_01455 ANIA_01459 ANIA_01525 ANIA_01620 ANIA_01771 ANIA_01775 ANIA_02140 ANIA_02240 ANIA_02626 ANIA_02738 ANIA_03080 ANIA_03113 ANIA_03370 ANIA_03592 ANIA_03720 ANIA_03817 ANIA_03826 ANIA_03833 ANIA_04068 ANIA_04165 ANIA_04235 ANIA_04317 ANIA_04446 ANIA_04465 ANIA_04589 ANIA_04683 ANIA_04728 ANI…
0.0201406	258	1043	1.16822	Anion binding	http://amigo.geneontology.org/amigo/term/GO:0043168	ANIA_00044 ANIA_00114 ANIA_00118 ANIA_00124 ANIA_00126 ANIA_00133 ANIA_00174 ANIA_00182 ANIA_00204 ANIA_00228 ANIA_00247 ANIA_00259 ANIA_00316 ANIA_00327 ANIA_00381 ANIA_00404 ANIA_00449 ANIA_00490 ANIA_00502 ANIA_00565 ANIA_00583 ANIA_00589 ANIA_00623 ANIA_00637 ANIA_00676 ANIA_00744 ANIA_00804 ANIA_00818 ANIA_00822 ANIA_00847 ANIA_00873 ANIA_00889 ANIA_00894 ANIA_00944 ANIA_00956 ANIA_01084 ANI…
0.0205316	4	4	4.72267	Vesicle cargo loading	http://amigo.geneontology.org/amigo/term/GO:0035459	ANIA_00261 ANIA_03080 ANIA_03720 ANIA_06257
0.0205316	4	4	4.72267	Positive regulation of translational fidelity	http://amigo.geneontology.org/amigo/term/GO:0045903	ANIA_03413 ANIA_04470 ANIA_04803 ANIA_05164
0.0205316	4	4	4.72267	Regulation of telomerase activity	http://amigo.geneontology.org/amigo/term/GO:0051972	ANIA_01366 ANIA_02141 ANIA_06895 ANIA_11066
0.0205316	4	4	4.72267	COPII-coated vesicle cargo loading	http://amigo.geneontology.org/amigo/term/GO:0090110	ANIA_00261 ANIA_03080 ANIA_03720 ANIA_06257
0.0205316	4	4	4.72267	MRNA pseudouridine synthesis	http://amigo.geneontology.org/amigo/term/GO:1990481	ANIA_00072 ANIA_03170 ANIA_06165 ANIA_08851
0.0205316	4	4	4.72267	Transcription initiation from RNA polymerase I promoter	http://amigo.geneontology.org/amigo/term/GO:0006361	ANIA_00312 ANIA_02283 ANIA_06706 ANIA_10501
0.0205316	4	4	4.72267	Nuclear pore inner ring	http://amigo.geneontology.org/amigo/term/GO:0044611	ANIA_05978 ANIA_06738 ANIA_10002 ANIA_10112
0.0205316	4	4	4.72267	Eukaryotic translation initiation factor 3 complex, eIF3e	http://amigo.geneontology.org/amigo/term/GO:0071540	ANIA_02743 ANIA_02907 ANIA_07540 ANIA_10765
0.0205316	4	4	4.72267	Macrolide binding	http://amigo.geneontology.org/amigo/term/GO:0005527	ANIA_03598 ANIA_08343 ANIA_08631 ANIA_10489
0.0205316	4	4	4.72267	FK506 binding	http://amigo.geneontology.org/amigo/term/GO:0005528	ANIA_03598 ANIA_08343 ANIA_08631 ANIA_10489
0.0205316	4	4	4.72267	Protein-transporting ATPase activity	http://amigo.geneontology.org/amigo/term/GO:0015450	ANIA_00559 ANIA_04589 ANIA_07687 ANIA_07721
0.0205316	4	4	4.72267	Ribosomal protein import into nucleus	http://amigo.geneontology.org/amigo/term/GO:0006610	ANIA_00906 ANIA_00926 ANIA_02120 ANIA_05717
0.0205316	4	4	4.72267	DNA/RNA helicase activity	http://amigo.geneontology.org/amigo/term/GO:0033677	ANIA_00228 ANIA_05992 ANIA_06070 ANIA_06895
0.0209816	5	6	3.93556	S-adenosylmethionine metabolic process	http://amigo.geneontology.org/amigo/term/GO:0046500	ANIA_01222 ANIA_01263 ANIA_03593 ANIA_04290 ANIA_06072
0.0209816	5	6	3.93556	Negative regulation of DNA metabolic process	http://amigo.geneontology.org/amigo/term/GO:0051053	ANIA_01708 ANIA_02141 ANIA_06895 ANIA_10621 ANIA_11066
0.0209816	5	6	3.93556	Assembly of large subunit precursor of preribosome	http://amigo.geneontology.org/amigo/term/GO:1902626	ANIA_04560 ANIA_05865 ANIA_08073 ANIA_08491 ANIA_08704
0.0209816	5	6	3.93556	Cytoplasmic dynein complex	http://amigo.geneontology.org/amigo/term/GO:0005868	ANIA_00118 ANIA_00420 ANIA_01454 ANIA_01953 ANIA_04664
0.0209816	5	6	3.93556	COPII vesicle coat	http://amigo.geneontology.org/amigo/term/GO:0030127	ANIA_00261 ANIA_03080 ANIA_03720 ANIA_04317 ANIA_06257
0.0209816	5	6	3.93556	Septin complex	http://amigo.geneontology.org/amigo/term/GO:0031105	ANIA_01394 ANIA_04667 ANIA_06688 ANIA_08182 ANIA_10595
0.0209816	5	6	3.93556	Pwp2p-containing subcomplex of 90S preribosome	http://amigo.geneontology.org/amigo/term/GO:0034388	ANIA_00305 ANIA_04460 ANIA_07458 ANIA_08183 ANIA_08293
0.0209816	5	6	3.93556	TRNA methyltransferase complex	http://amigo.geneontology.org/amigo/term/GO:0043527	ANIA_02735 ANIA_03603 ANIA_08066 ANIA_08799 ANIA_10451
0.0209816	5	6	3.93556	Pyrimidine nucleoside triphosphate biosynthetic process	http://amigo.geneontology.org/amigo/term/GO:0009148	ANIA_00490 ANIA_00565 ANIA_07028 ANIA_08213 ANIA_08216
0.0209816	5	6	3.93556	Deoxyribonucleotide biosynthetic process	http://amigo.geneontology.org/amigo/term/GO:0009263	ANIA_00067 ANIA_00271 ANIA_07028 ANIA_07429 ANIA_08213
0.0217646	27	75	1.70016	Regulation of cell cycle phase transition	http://amigo.geneontology.org/amigo/term/GO:1901987	ANIA_00676 ANIA_00872 ANIA_00905 ANIA_01207 ANIA_02511 ANIA_02927 ANIA_02969 ANIA_03620 ANIA_03941 ANIA_03946 ANIA_04182 ANIA_04279 ANIA_04571 ANIA_04735 ANIA_05057 ANIA_05133 ANIA_05406 ANIA_05495 ANIA_05676 ANIA_05717 ANIA_05881 ANIA_06616 ANIA_06896 ANIA_06978 ANIA_08013 ANIA_10433 ANIA_10434
0.021952	15	34	2.08353	Spindle organization	http://amigo.geneontology.org/amigo/term/GO:0007051	ANIA_00414 ANIA_00676 ANIA_00715 ANIA_00848 ANIA_01182 ANIA_01560 ANIA_02128 ANIA_02862 ANIA_03589 ANIA_05057 ANIA_05815 ANIA_06340 ANIA_06865 ANIA_06978 ANIA_10137
0.021982	110	406	1.27954	Protein localization	http://amigo.geneontology.org/amigo/term/GO:0008104	ANIA_00261 ANIA_00406 ANIA_00417 ANIA_00420 ANIA_00559 ANIA_00747 ANIA_00834 ANIA_00844 ANIA_00846 ANIA_00906 ANIA_00922 ANIA_00926 ANIA_01064 ANIA_01099 ANIA_01154 ANIA_01157 ANIA_01177 ANIA_01190 ANIA_01223 ANIA_01272 ANIA_01282 ANIA_01379 ANIA_01394 ANIA_01525 ANIA_01560 ANIA_01892 ANIA_01940 ANIA_01980 ANIA_02062 ANIA_02086 ANIA_02120 ANIA_02140 ANIA_02142 ANIA_02431 ANIA_02518 ANIA_02687 ANI…
0.0221955	9	16	2.6565	Endoplasmic reticulum-Golgi intermediate compartment	http://amigo.geneontology.org/amigo/term/GO:0005793	ANIA_00131 ANIA_00743 ANIA_01154 ANIA_04165 ANIA_04446 ANIA_04547 ANIA_06307 ANIA_07302 ANIA_08194
0.022226	30	86	1.64744	Nuclear chromosome	http://amigo.geneontology.org/amigo/term/GO:0000228	ANIA_00126 ANIA_00260 ANIA_00327 ANIA_00872 ANIA_01207 ANIA_01208 ANIA_02452 ANIA_02491 ANIA_03033 ANIA_03067 ANIA_03620 ANIA_04320 ANIA_04509 ANIA_04959 ANIA_05102 ANIA_05892 ANIA_06015 ANIA_06070 ANIA_06616 ANIA_06687 ANIA_07009 ANIA_07325 ANIA_08076 ANIA_08212 ANIA_09077 ANIA_10470 ANIA_10560 ANIA_10635 ANIA_10755 ANIA_10855
0.023127	18	44	1.932	N-methyltransferase activity	http://amigo.geneontology.org/amigo/term/GO:0008170	ANIA_00134 ANIA_00288 ANIA_00745 ANIA_01170 ANIA_01445 ANIA_02557 ANIA_03096 ANIA_03313 ANIA_05998 ANIA_06072 ANIA_06568 ANIA_07340 ANIA_08825 ANIA_08849 ANIA_09406 ANIA_10189 ANIA_10526 ANIA_10583
0.0242904	10	19	2.48562	Serine-type endopeptidase activity	http://amigo.geneontology.org/amigo/term/GO:0004252	ANIA_01372 ANIA_02194 ANIA_02366 ANIA_02572 ANIA_05558 ANIA_07159 ANIA_07201 ANIA_09460 ANIA_10198 ANIA_10465
0.0250114	11	22	2.36133	Regulation of G2/M transition of mitotic cell cycle	http://amigo.geneontology.org/amigo/term/GO:0010389	ANIA_01207 ANIA_02969 ANIA_03941 ANIA_04182 ANIA_04571 ANIA_05676 ANIA_05717 ANIA_06616 ANIA_06896 ANIA_06978 ANIA_10434
0.0250114	11	22	2.36133	Regulation of cell cycle G2/M phase transition	http://amigo.geneontology.org/amigo/term/GO:1902749	ANIA_01207 ANIA_02969 ANIA_03941 ANIA_04182 ANIA_04571 ANIA_05676 ANIA_05717 ANIA_06616 ANIA_06896 ANIA_06978 ANIA_10434
0.0250114	11	22	2.36133	Single-stranded RNA binding	http://amigo.geneontology.org/amigo/term/GO:0003727	ANIA_00228 ANIA_03427 ANIA_03745 ANIA_04000 ANIA_05111 ANIA_05992 ANIA_06070 ANIA_07350 ANIA_09093 ANIA_10200 ANIA_10966
0.0250573	29	83	1.65009	Glycosylation	http://amigo.geneontology.org/amigo/term/GO:0070085	ANIA_00104 ANIA_00487 ANIA_00551 ANIA_00667 ANIA_00787 ANIA_01455 ANIA_01459 ANIA_01620 ANIA_02240 ANIA_02626 ANIA_03370 ANIA_03733 ANIA_04623 ANIA_04683 ANIA_04761 ANIA_04864 ANIA_05346 ANIA_05748 ANIA_05888 ANIA_06736 ANIA_07301 ANIA_07426 ANIA_07472 ANIA_07534 ANIA_08138 ANIA_08290 ANIA_10118 ANIA_10710 ANIA_11141
0.02523	17	41	1.95818	Regulation of chromosome organization	http://amigo.geneontology.org/amigo/term/GO:0033044	ANIA_00905 ANIA_02141 ANIA_02491 ANIA_02511 ANIA_02927 ANIA_03067 ANIA_03946 ANIA_04735 ANIA_05102 ANIA_05133 ANIA_05495 ANIA_06070 ANIA_06895 ANIA_06978 ANIA_08013 ANIA_10433 ANIA_11066
0.0268621	7	11	3.00533	Septin cytoskeleton	http://amigo.geneontology.org/amigo/term/GO:0032156	ANIA_01394 ANIA_04667 ANIA_04706 ANIA_06150 ANIA_06688 ANIA_08182 ANIA_10595
0.0268621	7	11	3.00533	Protein transmembrane transporter activity	http://amigo.geneontology.org/amigo/term/GO:0008320	ANIA_00559 ANIA_00834 ANIA_01892 ANIA_04589 ANIA_06510 ANIA_07687 ANIA_07721
0.0268621	7	11	3.00533	Macromolecule transmembrane transporter activity	http://amigo.geneontology.org/amigo/term/GO:0022884	ANIA_00559 ANIA_00834 ANIA_01892 ANIA_04589 ANIA_06510 ANIA_07687 ANIA_07721
0.0269454	38	117	1.53386	Protein-containing complex binding	http://amigo.geneontology.org/amigo/term/GO:0044877	ANIA_00814 ANIA_00906 ANIA_01256 ANIA_01286 ANIA_01366 ANIA_01367 ANIA_01708 ANIA_02775 ANIA_03055 ANIA_03096 ANIA_03427 ANIA_03827 ANIA_04015 ANIA_04163 ANIA_04469 ANIA_04571 ANIA_04695 ANIA_04706 ANIA_05007 ANIA_05102 ANIA_05168 ANIA_05686 ANIA_05719 ANIA_06341 ANIA_06554 ANIA_06651 ANIA_06687 ANIA_07009 ANIA_07143 ANIA_07350 ANIA_07721 ANIA_08862 ANIA_09003 ANIA_09463 ANIA_10170 ANIA_10205 ANI…
0.0272716	25	69	1.71111	Chromatin binding	http://amigo.geneontology.org/amigo/term/GO:0003682	ANIA_00292 ANIA_00872 ANIA_01207 ANIA_01286 ANIA_02491 ANIA_02963 ANIA_02969 ANIA_02973 ANIA_03910 ANIA_04265 ANIA_04752 ANIA_05102 ANIA_05910 ANIA_06070 ANIA_06221 ANIA_06554 ANIA_06687 ANIA_06978 ANIA_07009 ANIA_07260 ANIA_07441 ANIA_07994 ANIA_09517 ANIA_10635 ANIA_10755
0.0278726	21	55	1.8032	Liposaccharide metabolic process	http://amigo.geneontology.org/amigo/term/GO:1903509	ANIA_00246 ANIA_00367 ANIA_00636 ANIA_01165 ANIA_01775 ANIA_02096 ANIA_02240 ANIA_02464 ANIA_03370 ANIA_03826 ANIA_04084 ANIA_04235 ANIA_04495 ANIA_06496 ANIA_06589 ANIA_07049 ANIA_07548 ANIA_10118 ANIA_10439 ANIA_10639 ANIA_11232
0.0278726	21	55	1.8032	Glycolipid metabolic process	http://amigo.geneontology.org/amigo/term/GO:0006664	ANIA_00246 ANIA_00367 ANIA_00636 ANIA_01165 ANIA_01775 ANIA_02096 ANIA_02240 ANIA_02464 ANIA_03370 ANIA_03826 ANIA_04084 ANIA_04235 ANIA_04495 ANIA_06496 ANIA_06589 ANIA_07049 ANIA_07548 ANIA_10118 ANIA_10439 ANIA_10639 ANIA_11232
0.0291593	70	244	1.35486	Organophosphate biosynthetic process	http://amigo.geneontology.org/amigo/term/GO:0090407	ANIA_00067 ANIA_00259 ANIA_00271 ANIA_00357 ANIA_00367 ANIA_00490 ANIA_00565 ANIA_00579 ANIA_00636 ANIA_00906 ANIA_00910 ANIA_01523 ANIA_01624 ANIA_01769 ANIA_01775 ANIA_01857 ANIA_01965 ANIA_02096 ANIA_02240 ANIA_02261 ANIA_02315 ANIA_02435 ANIA_02436 ANIA_03169 ANIA_03370 ANIA_03826 ANIA_03869 ANIA_03916 ANIA_04235 ANIA_04414 ANIA_04464 ANIA_04495 ANIA_04923 ANIA_05162 ANIA_05566 ANIA_05626 ANI…
0.0297466	15	35	2.024	Microtubule cytoskeleton organization involved in mitosis	http://amigo.geneontology.org/amigo/term/GO:1902850	ANIA_00676 ANIA_00715 ANIA_00848 ANIA_01182 ANIA_01560 ANIA_02128 ANIA_03589 ANIA_05057 ANIA_05815 ANIA_06125 ANIA_06340 ANIA_06865 ANIA_06978 ANIA_08862 ANIA_10137
0.0321135	14	32	2.06617	Protein localization to endoplasmic reticulum	http://amigo.geneontology.org/amigo/term/GO:0070972	ANIA_00417 ANIA_00834 ANIA_01154 ANIA_01282 ANIA_01525 ANIA_02062 ANIA_04580 ANIA_04589 ANIA_05915 ANIA_07721 ANIA_08194 ANIA_09460 ANIA_10710 ANIA_11226
0.0321135	14	32	2.06617	Translational elongation	http://amigo.geneontology.org/amigo/term/GO:0006414	ANIA_01084 ANIA_01162 ANIA_03832 ANIA_04015 ANIA_04163 ANIA_04218 ANIA_04695 ANIA_05719 ANIA_05996 ANIA_06563 ANIA_06700 ANIA_07143 ANIA_10224 ANIA_10248
0.0331281	8	14	2.69867	Citrate cycle (TCA cycle)	http://www.genome.jp/kegg-bin/show_pathway?ani00020	ANIA_02295 ANIA_02332 ANIA_02435 ANIA_02436 ANIA_05162 ANIA_06708 ANIA_08275 ANIA_08707
0.0342338	13	29	2.11706	Mitotic spindle organization	http://amigo.geneontology.org/amigo/term/GO:0007052	ANIA_00676 ANIA_00715 ANIA_00848 ANIA_01182 ANIA_01560 ANIA_02128 ANIA_03589 ANIA_05057 ANIA_05815 ANIA_06340 ANIA_06865 ANIA_06978 ANIA_10137
0.0342338	13	29	2.11706	Ribonucleoside monophosphate biosynthetic process	http://amigo.geneontology.org/amigo/term/GO:0009156	ANIA_00565 ANIA_01965 ANIA_04464 ANIA_05566 ANIA_05884 ANIA_05909 ANIA_06157 ANIA_06209 ANIA_06541 ANIA_06711 ANIA_06993 ANIA_07502 ANIA_10131
0.0346302	23	63	1.72415	Polymeric cytoskeletal fiber	http://amigo.geneontology.org/amigo/term/GO:0099513	ANIA_00118 ANIA_00316 ANIA_00420 ANIA_00676 ANIA_00995 ANIA_01182 ANIA_02862 ANIA_03124 ANIA_03721 ANIA_04513 ANIA_05531 ANIA_05686 ANIA_05815 ANIA_06125 ANIA_06340 ANIA_06838 ANIA_06863 ANIA_06875 ANIA_07570 ANIA_08286 ANIA_08851 ANIA_08862 ANIA_10627
0.0351793	21	56	1.771	Regulation of mRNA metabolic process	http://amigo.geneontology.org/amigo/term/GO:1903311	ANIA_00282 ANIA_00406 ANIA_02850 ANIA_03739 ANIA_04000 ANIA_04617 ANIA_04760 ANIA_05802 ANIA_06111 ANIA_06244 ANIA_06540 ANIA_06587 ANIA_06600 ANIA_07474 ANIA_07492 ANIA_08038 ANIA_09090 ANIA_10082 ANIA_10164 ANIA_10406 ANIA_10895
0.0363812	33	100	1.55848	Nucleotidyltransferase activity	http://amigo.geneontology.org/amigo/term/GO:0016779	ANIA_00192 ANIA_00260 ANIA_00321 ANIA_00752 ANIA_00804 ANIA_01447 ANIA_01911 ANIA_02135 ANIA_02283 ANIA_02415 ANIA_02670 ANIA_02717 ANIA_02747 ANIA_03033 ANIA_03067 ANIA_03419 ANIA_03933 ANIA_03944 ANIA_04769 ANIA_05694 ANIA_06558 ANIA_07325 ANIA_07608 ANIA_07609 ANIA_08272 ANIA_09094 ANIA_09102 ANIA_09125 ANIA_10470 ANIA_10755 ANIA_10855 ANIA_10970 ANIA_11183
0.0365205	16	39	1.93751	Glycolipid biosynthetic process	http://amigo.geneontology.org/amigo/term/GO:0009247	ANIA_00367 ANIA_00636 ANIA_01775 ANIA_02096 ANIA_02240 ANIA_03370 ANIA_03826 ANIA_04235 ANIA_04495 ANIA_06496 ANIA_06589 ANIA_07049 ANIA_10118 ANIA_10439 ANIA_10639 ANIA_11232
0.0370123	11	23	2.25867	Pyrimidine nucleobase metabolic process	http://amigo.geneontology.org/amigo/term/GO:0006206	ANIA_00474 ANIA_00490 ANIA_00565 ANIA_01823 ANIA_03591 ANIA_05884 ANIA_05909 ANIA_06157 ANIA_07502 ANIA_08418 ANIA_10131
0.0370123	11	23	2.25867	Ribosome binding	http://amigo.geneontology.org/amigo/term/GO:0043022	ANIA_02775 ANIA_03055 ANIA_03096 ANIA_04015 ANIA_04163 ANIA_04695 ANIA_06651 ANIA_07143 ANIA_07721 ANIA_10170 ANIA_10315
0.0370123	49	162	1.42846	Cytoskeleton organization	http://amigo.geneontology.org/amigo/term/GO:0007010	ANIA_00118 ANIA_00316 ANIA_00414 ANIA_00676 ANIA_00715 ANIA_00844 ANIA_00848 ANIA_01099 ANIA_01182 ANIA_01382 ANIA_01560 ANIA_02128 ANIA_02687 ANIA_02862 ANIA_03062 ANIA_03171 ANIA_03589 ANIA_04182 ANIA_04417 ANIA_04513 ANIA_04664 ANIA_04743 ANIA_04998 ANIA_05007 ANIA_05057 ANIA_05531 ANIA_05648 ANIA_05686 ANIA_05815 ANIA_05829 ANIA_06125 ANIA_06340 ANIA_06341 ANIA_06732 ANIA_06838 ANIA_06865 ANI…
0.0383548	6	9	3.14845	RRNA pseudouridine synthesis	http://amigo.geneontology.org/amigo/term/GO:0031118	ANIA_00695 ANIA_05155 ANIA_08254 ANIA_08851 ANIA_10712 ANIA_10936
0.0383548	6	9	3.14845	SWI/SNF complex	http://amigo.geneontology.org/amigo/term/GO:0016514	ANIA_01929 ANIA_04320 ANIA_06705 ANIA_07441 ANIA_09359 ANIA_10524
0.0383548	6	9	3.14845	Posttranslational protein targeting to endoplasmic reticulum membrane	http://amigo.geneontology.org/amigo/term/GO:0006620	ANIA_00417 ANIA_00834 ANIA_01282 ANIA_02062 ANIA_04589 ANIA_07721
0.0383548	6	9	3.14845	Nucleocytoplasmic carrier activity	http://amigo.geneontology.org/amigo/term/GO:0140142	ANIA_00906 ANIA_00926 ANIA_02120 ANIA_02142 ANIA_05717 ANIA_06591
0.0394818	43	139	1.46097	Supramolecular complex	http://amigo.geneontology.org/amigo/term/GO:0099080	ANIA_00118 ANIA_00276 ANIA_00316 ANIA_00359 ANIA_00406 ANIA_00420 ANIA_00676 ANIA_00995 ANIA_01182 ANIA_01392 ANIA_01495 ANIA_01977 ANIA_02511 ANIA_02862 ANIA_02927 ANIA_02932 ANIA_03124 ANIA_03411 ANIA_03721 ANIA_04000 ANIA_04513 ANIA_04969 ANIA_05115 ANIA_05531 ANIA_05686 ANIA_05815 ANIA_06125 ANIA_06340 ANIA_06554 ANIA_06600 ANIA_06711 ANIA_06838 ANIA_06863 ANIA_06875 ANIA_07480 ANIA_07492 ANI…
0.0395653	15	36	1.96778	Regulation of mRNA stability	http://amigo.geneontology.org/amigo/term/GO:0043488	ANIA_00282 ANIA_00406 ANIA_03739 ANIA_04000 ANIA_04617 ANIA_06111 ANIA_06244 ANIA_06540 ANIA_06587 ANIA_07474 ANIA_07492 ANIA_08038 ANIA_09090 ANIA_10164 ANIA_10406
0.0395653	15	36	1.96778	Regulation of mRNA catabolic process	http://amigo.geneontology.org/amigo/term/GO:0061013	ANIA_00282 ANIA_00406 ANIA_03739 ANIA_04000 ANIA_04617 ANIA_06111 ANIA_06244 ANIA_06540 ANIA_06587 ANIA_07474 ANIA_07492 ANIA_08038 ANIA_09090 ANIA_10164 ANIA_10406
0.0401151	28	82	1.61262	Glycoprotein metabolic process	http://amigo.geneontology.org/amigo/term/GO:0009100	ANIA_00104 ANIA_00551 ANIA_00667 ANIA_00787 ANIA_01455 ANIA_01459 ANIA_01620 ANIA_02325 ANIA_02626 ANIA_03054 ANIA_03733 ANIA_04623 ANIA_04683 ANIA_04761 ANIA_04864 ANIA_05346 ANIA_05748 ANIA_05888 ANIA_06736 ANIA_07301 ANIA_07426 ANIA_07472 ANIA_07534 ANIA_08290 ANIA_10118 ANIA_10702 ANIA_10710 ANIA_11141
0.0420218	23	64	1.69721	Supramolecular polymer	http://amigo.geneontology.org/amigo/term/GO:0099081	ANIA_00118 ANIA_00316 ANIA_00420 ANIA_00676 ANIA_00995 ANIA_01182 ANIA_02862 ANIA_03124 ANIA_03721 ANIA_04513 ANIA_05531 ANIA_05686 ANIA_05815 ANIA_06125 ANIA_06340 ANIA_06838 ANIA_06863 ANIA_06875 ANIA_07570 ANIA_08286 ANIA_08851 ANIA_08862 ANIA_10627
0.0420218	23	64	1.69721	Supramolecular fiber	http://amigo.geneontology.org/amigo/term/GO:0099512	ANIA_00118 ANIA_00316 ANIA_00420 ANIA_00676 ANIA_00995 ANIA_01182 ANIA_02862 ANIA_03124 ANIA_03721 ANIA_04513 ANIA_05531 ANIA_05686 ANIA_05815 ANIA_06125 ANIA_06340 ANIA_06838 ANIA_06863 ANIA_06875 ANIA_07570 ANIA_08286 ANIA_08851 ANIA_08862 ANIA_10627
0.0430343	40	128	1.47583	Ribonucleotide metabolic process	http://amigo.geneontology.org/amigo/term/GO:0009259	ANIA_00067 ANIA_00259 ANIA_00357 ANIA_00490 ANIA_00565 ANIA_01202 ANIA_01523 ANIA_01624 ANIA_01888 ANIA_02315 ANIA_02334 ANIA_02435 ANIA_02436 ANIA_02938 ANIA_03817 ANIA_03869 ANIA_04414 ANIA_04464 ANIA_04923 ANIA_04958 ANIA_05162 ANIA_05210 ANIA_05566 ANIA_05626 ANIA_05884 ANIA_05909 ANIA_06157 ANIA_06209 ANIA_06541 ANIA_06708 ANIA_06993 ANIA_07000 ANIA_07502 ANIA_07754 ANIA_08216 ANIA_09446 ANI…
0.0432549	21	57	1.73993	Microtubule	http://amigo.geneontology.org/amigo/term/GO:0005874	ANIA_00118 ANIA_00316 ANIA_00420 ANIA_00676 ANIA_00995 ANIA_01182 ANIA_02862 ANIA_03124 ANIA_03721 ANIA_04513 ANIA_05531 ANIA_05815 ANIA_06125 ANIA_06340 ANIA_06838 ANIA_06863 ANIA_06875 ANIA_07570 ANIA_08286 ANIA_08851 ANIA_10627
0.0445471	65	228	1.34637	MRNA metabolic process	http://amigo.geneontology.org/amigo/term/GO:0016071	ANIA_00072 ANIA_00133 ANIA_00189 ANIA_00211 ANIA_00247 ANIA_00282 ANIA_00406 ANIA_00707 ANIA_00753 ANIA_01208 ANIA_01249 ANIA_01319 ANIA_01408 ANIA_01456 ANIA_01495 ANIA_01635 ANIA_02007 ANIA_02105 ANIA_02147 ANIA_02153 ANIA_02457 ANIA_02850 ANIA_03082 ANIA_03170 ANIA_03411 ANIA_03657 ANIA_03739 ANIA_03812 ANIA_03937 ANIA_04000 ANIA_04617 ANIA_04631 ANIA_04760 ANIA_05337 ANIA_05452 ANIA_05694 ANI…
0.0453781	27	79	1.61408	Ribonucleotide biosynthetic process	http://amigo.geneontology.org/amigo/term/GO:0009260	ANIA_00259 ANIA_00357 ANIA_00490 ANIA_00565 ANIA_01523 ANIA_01624 ANIA_02315 ANIA_02435 ANIA_02436 ANIA_04464 ANIA_05162 ANIA_05566 ANIA_05626 ANIA_05884 ANIA_05909 ANIA_06157 ANIA_06209 ANIA_06541 ANIA_06708 ANIA_06993 ANIA_07502 ANIA_07754 ANIA_08216 ANIA_09446 ANIA_10131 ANIA_10188 ANIA_10626
0.0468163	54	184	1.386	Aromatic compound catabolic process	http://amigo.geneontology.org/amigo/term/GO:0019439	ANIA_00242 ANIA_00258 ANIA_00271 ANIA_00282 ANIA_00406 ANIA_00707 ANIA_01115 ANIA_01202 ANIA_01263 ANIA_01809 ANIA_01857 ANIA_01895 ANIA_01896 ANIA_02153 ANIA_02185 ANIA_02938 ANIA_03411 ANIA_03657 ANIA_03739 ANIA_03812 ANIA_04000 ANIA_04009 ANIA_04075 ANIA_04412 ANIA_04617 ANIA_04631 ANIA_04958 ANIA_04964 ANIA_05068 ANIA_05114 ANIA_05337 ANIA_05694 ANIA_05931 ANIA_05939 ANIA_06075 ANIA_06111 ANI…
0.0468163	50	168	1.40556	Regulation of cell cycle	http://amigo.geneontology.org/amigo/term/GO:0051726	ANIA_00676 ANIA_00807 ANIA_00808 ANIA_00872 ANIA_00905 ANIA_01207 ANIA_01359 ANIA_01560 ANIA_01661 ANIA_02059 ANIA_02137 ANIA_02511 ANIA_02687 ANIA_02927 ANIA_02969 ANIA_03411 ANIA_03620 ANIA_03795 ANIA_03941 ANIA_03946 ANIA_04182 ANIA_04279 ANIA_04571 ANIA_04735 ANIA_05028 ANIA_05057 ANIA_05102 ANIA_05133 ANIA_05406 ANIA_05495 ANIA_05666 ANIA_05674 ANIA_05676 ANIA_05717 ANIA_05815 ANIA_05881 ANI…
0.0487491	7	12	2.75489	Double-strand break repair via break-induced replication	http://amigo.geneontology.org/amigo/term/GO:0000727	ANIA_00228 ANIA_00872 ANIA_02491 ANIA_05992 ANIA_06070 ANIA_07994 ANIA_10497
Species	Type of genes	Criteria	Number of genes
A. nidulans	downregulated	DEG; log2FC<-2	929
Enrichment FDR	nGenes	Pathway Genes	Fold Enrichment	Pathway	URL	Genes
3.61146e-100	158	259	6.96291	Ribosome biogenesis	http://amigo.geneontology.org/amigo/term/GO:0042254	ANIA_00074 ANIA_00092 ANIA_00189 ANIA_00204 ANIA_00237 ANIA_00247 ANIA_00262 ANIA_00305 ANIA_00421 ANIA_00465 ANIA_00475 ANIA_00570 ANIA_00583 ANIA_00589 ANIA_00625 ANIA_00637 ANIA_00695 ANIA_00728 ANIA_00745 ANIA_00843 ANIA_00844 ANIA_00944 ANIA_00946 ANIA_01013 ANIA_01122 ANIA_01164 ANIA_01166 ANIA_01175 ANIA_01200 ANIA_01215 ANIA_01228 ANIA_01256 ANIA_01319 ANIA_01354 ANIA_01366 ANIA_01367 ANI…
2.28979e-97	174	326	6.0725	Ribonucleoprotein complex biogenesis	http://amigo.geneontology.org/amigo/term/GO:0022613	ANIA_00074 ANIA_00092 ANIA_00189 ANIA_00204 ANIA_00237 ANIA_00247 ANIA_00262 ANIA_00305 ANIA_00359 ANIA_00421 ANIA_00465 ANIA_00475 ANIA_00570 ANIA_00583 ANIA_00589 ANIA_00625 ANIA_00637 ANIA_00695 ANIA_00728 ANIA_00745 ANIA_00843 ANIA_00844 ANIA_00944 ANIA_00946 ANIA_01013 ANIA_01122 ANIA_01164 ANIA_01166 ANIA_01175 ANIA_01200 ANIA_01215 ANIA_01228 ANIA_01256 ANIA_01319 ANIA_01354 ANIA_01366 ANI…
2.51841e-73	116	186	7.04629	RRNA processing	http://amigo.geneontology.org/amigo/term/GO:0006364	ANIA_00074 ANIA_00092 ANIA_00189 ANIA_00204 ANIA_00237 ANIA_00247 ANIA_00305 ANIA_00421 ANIA_00465 ANIA_00475 ANIA_00583 ANIA_00589 ANIA_00625 ANIA_00637 ANIA_00695 ANIA_00745 ANIA_00944 ANIA_01122 ANIA_01164 ANIA_01175 ANIA_01228 ANIA_01319 ANIA_01354 ANIA_01367 ANIA_01434 ANIA_01452 ANIA_01474 ANIA_01533 ANIA_01750 ANIA_01949 ANIA_01957 ANIA_01964 ANIA_02077 ANIA_02147 ANIA_02292 ANIA_02926 ANI…
2.7042e-72	116	189	6.93385	RRNA metabolic process	http://amigo.geneontology.org/amigo/term/GO:0016072	ANIA_00074 ANIA_00092 ANIA_00189 ANIA_00204 ANIA_00237 ANIA_00247 ANIA_00305 ANIA_00421 ANIA_00465 ANIA_00475 ANIA_00583 ANIA_00589 ANIA_00625 ANIA_00637 ANIA_00695 ANIA_00745 ANIA_00944 ANIA_01122 ANIA_01164 ANIA_01175 ANIA_01228 ANIA_01319 ANIA_01354 ANIA_01367 ANIA_01434 ANIA_01452 ANIA_01474 ANIA_01533 ANIA_01750 ANIA_01949 ANIA_01957 ANIA_01964 ANIA_02077 ANIA_02147 ANIA_02292 ANIA_02926 ANI…
8.42112e-69	118	207	6.46848	Nucleolus	http://amigo.geneontology.org/amigo/term/GO:0005730	ANIA_00074 ANIA_00092 ANIA_00189 ANIA_00204 ANIA_00237 ANIA_00247 ANIA_00305 ANIA_00421 ANIA_00461 ANIA_00475 ANIA_00583 ANIA_00589 ANIA_00625 ANIA_00637 ANIA_00695 ANIA_00844 ANIA_00944 ANIA_00946 ANIA_01164 ANIA_01215 ANIA_01319 ANIA_01354 ANIA_01367 ANIA_01434 ANIA_01452 ANIA_01474 ANIA_01533 ANIA_01666 ANIA_01750 ANIA_01949 ANIA_02077 ANIA_02120 ANIA_02147 ANIA_02283 ANIA_02292 ANIA_02415 ANI…
4.42733e-68	244	856	3.22966	Non-membrane-bounded organelle	http://amigo.geneontology.org/amigo/term/GO:0043228	ANIA_00044 ANIA_00074 ANIA_00092 ANIA_00118 ANIA_00126 ANIA_00189 ANIA_00204 ANIA_00237 ANIA_00247 ANIA_00260 ANIA_00262 ANIA_00305 ANIA_00316 ANIA_00359 ANIA_00421 ANIA_00433 ANIA_00445 ANIA_00461 ANIA_00465 ANIA_00475 ANIA_00570 ANIA_00583 ANIA_00589 ANIA_00625 ANIA_00637 ANIA_00695 ANIA_00776 ANIA_00843 ANIA_00844 ANIA_00907 ANIA_00944 ANIA_00946 ANIA_00997 ANIA_01013 ANIA_01099 ANIA_01122 ANI…
4.42733e-68	244	856	3.22966	Intracellular non-membrane-bounded organelle	http://amigo.geneontology.org/amigo/term/GO:0043232	ANIA_00044 ANIA_00074 ANIA_00092 ANIA_00118 ANIA_00126 ANIA_00189 ANIA_00204 ANIA_00237 ANIA_00247 ANIA_00260 ANIA_00262 ANIA_00305 ANIA_00316 ANIA_00359 ANIA_00421 ANIA_00433 ANIA_00445 ANIA_00461 ANIA_00465 ANIA_00475 ANIA_00570 ANIA_00583 ANIA_00589 ANIA_00625 ANIA_00637 ANIA_00695 ANIA_00776 ANIA_00843 ANIA_00844 ANIA_00907 ANIA_00944 ANIA_00946 ANIA_00997 ANIA_01013 ANIA_01099 ANIA_01122 ANI…
5.86553e-66	136	289	5.34376	NcRNA processing	http://amigo.geneontology.org/amigo/term/GO:0034470	ANIA_00074 ANIA_00092 ANIA_00141 ANIA_00189 ANIA_00190 ANIA_00204 ANIA_00237 ANIA_00247 ANIA_00305 ANIA_00421 ANIA_00465 ANIA_00475 ANIA_00583 ANIA_00589 ANIA_00625 ANIA_00637 ANIA_00695 ANIA_00745 ANIA_00757 ANIA_00804 ANIA_00818 ANIA_00944 ANIA_00956 ANIA_00997 ANIA_01122 ANIA_01164 ANIA_01175 ANIA_01228 ANIA_01319 ANIA_01354 ANIA_01367 ANIA_01434 ANIA_01452 ANIA_01474 ANIA_01533 ANIA_01750 ANI…
9.49644e-65	161	409	4.45629	Ribonucleoprotein complex	http://amigo.geneontology.org/amigo/term/GO:1990904	ANIA_00074 ANIA_00092 ANIA_00133 ANIA_00189 ANIA_00242 ANIA_00247 ANIA_00262 ANIA_00305 ANIA_00359 ANIA_00421 ANIA_00433 ANIA_00445 ANIA_00465 ANIA_00475 ANIA_00570 ANIA_00695 ANIA_00728 ANIA_00745 ANIA_00753 ANIA_00776 ANIA_00843 ANIA_00907 ANIA_00946 ANIA_01013 ANIA_01045 ANIA_01122 ANIA_01164 ANIA_01166 ANIA_01175 ANIA_01228 ANIA_01319 ANIA_01345 ANIA_01354 ANIA_01367 ANIA_01408 ANIA_01434 ANI…
2.28841e-57	137	333	4.66531	NcRNA metabolic process	http://amigo.geneontology.org/amigo/term/GO:0034660	ANIA_00074 ANIA_00092 ANIA_00141 ANIA_00189 ANIA_00190 ANIA_00204 ANIA_00237 ANIA_00247 ANIA_00305 ANIA_00421 ANIA_00465 ANIA_00475 ANIA_00583 ANIA_00589 ANIA_00625 ANIA_00637 ANIA_00695 ANIA_00745 ANIA_00757 ANIA_00804 ANIA_00818 ANIA_00944 ANIA_00956 ANIA_00997 ANIA_01122 ANIA_01164 ANIA_01175 ANIA_01228 ANIA_01319 ANIA_01354 ANIA_01367 ANIA_01434 ANIA_01452 ANIA_01474 ANIA_01533 ANIA_01710 ANI…
3.00951e-49	68	93	8.21675	Preribosome	http://amigo.geneontology.org/amigo/term/GO:0030684	ANIA_00074 ANIA_00092 ANIA_00247 ANIA_00305 ANIA_00421 ANIA_00475 ANIA_00745 ANIA_00946 ANIA_01164 ANIA_01175 ANIA_01319 ANIA_01354 ANIA_01367 ANIA_01434 ANIA_01533 ANIA_02077 ANIA_02147 ANIA_02262 ANIA_02926 ANIA_03167 ANIA_03172 ANIA_03313 ANIA_03413 ANIA_03745 ANIA_03794 ANIA_03827 ANIA_03938 ANIA_04065 ANIA_04087 ANIA_04226 ANIA_04232 ANIA_04298 ANIA_04456 ANIA_04460 ANIA_04469 ANIA_04534 ANI…
8.13797e-48	148	448	3.74587	RNA processing	http://amigo.geneontology.org/amigo/term/GO:0006396	ANIA_00074 ANIA_00092 ANIA_00133 ANIA_00141 ANIA_00189 ANIA_00190 ANIA_00204 ANIA_00237 ANIA_00247 ANIA_00305 ANIA_00421 ANIA_00465 ANIA_00475 ANIA_00583 ANIA_00589 ANIA_00625 ANIA_00637 ANIA_00695 ANIA_00745 ANIA_00757 ANIA_00804 ANIA_00818 ANIA_00944 ANIA_00956 ANIA_00997 ANIA_01045 ANIA_01122 ANIA_01164 ANIA_01175 ANIA_01228 ANIA_01319 ANIA_01354 ANIA_01367 ANIA_01408 ANIA_01434 ANIA_01452 ANI…
4.75644e-47	200	776	2.9341	Cellular component biogenesis	http://amigo.geneontology.org/amigo/term/GO:0044085	ANIA_00074 ANIA_00092 ANIA_00189 ANIA_00204 ANIA_00228 ANIA_00237 ANIA_00247 ANIA_00262 ANIA_00305 ANIA_00316 ANIA_00359 ANIA_00421 ANIA_00465 ANIA_00475 ANIA_00570 ANIA_00583 ANIA_00589 ANIA_00625 ANIA_00637 ANIA_00695 ANIA_00728 ANIA_00745 ANIA_00843 ANIA_00844 ANIA_00906 ANIA_00944 ANIA_00946 ANIA_01013 ANIA_01122 ANIA_01164 ANIA_01166 ANIA_01175 ANIA_01200 ANIA_01215 ANIA_01228 ANIA_01256 ANI…
5.40942e-47	158	515	3.50206	RNA binding	http://amigo.geneontology.org/amigo/term/GO:0003723	ANIA_00105 ANIA_00133 ANIA_00189 ANIA_00204 ANIA_00228 ANIA_00242 ANIA_00247 ANIA_00262 ANIA_00305 ANIA_00312 ANIA_00359 ANIA_00421 ANIA_00433 ANIA_00445 ANIA_00570 ANIA_00583 ANIA_00589 ANIA_00625 ANIA_00695 ANIA_00728 ANIA_00745 ANIA_00753 ANIA_00757 ANIA_00834 ANIA_00843 ANIA_00944 ANIA_00997 ANIA_01013 ANIA_01045 ANIA_01084 ANIA_01122 ANIA_01166 ANIA_01228 ANIA_01288 ANIA_01319 ANIA_01354 ANI…
1.58919e-45	142	432	3.72837	Nuclear lumen	http://amigo.geneontology.org/amigo/term/GO:0031981	ANIA_00074 ANIA_00092 ANIA_00126 ANIA_00189 ANIA_00204 ANIA_00237 ANIA_00247 ANIA_00260 ANIA_00305 ANIA_00421 ANIA_00461 ANIA_00475 ANIA_00583 ANIA_00589 ANIA_00625 ANIA_00637 ANIA_00695 ANIA_00745 ANIA_00808 ANIA_00814 ANIA_00844 ANIA_00905 ANIA_00906 ANIA_00944 ANIA_00946 ANIA_01164 ANIA_01215 ANIA_01319 ANIA_01354 ANIA_01367 ANIA_01434 ANIA_01452 ANIA_01474 ANIA_01533 ANIA_01666 ANIA_01750 ANI…
1.70392e-42	59	82	8.18542	Ribosomal small subunit biogenesis	http://amigo.geneontology.org/amigo/term/GO:0042274	ANIA_00247 ANIA_00305 ANIA_00421 ANIA_00465 ANIA_00475 ANIA_00843 ANIA_00944 ANIA_01164 ANIA_01319 ANIA_01354 ANIA_01434 ANIA_01533 ANIA_01964 ANIA_02077 ANIA_02147 ANIA_02262 ANIA_02292 ANIA_03056 ANIA_03167 ANIA_03172 ANIA_03313 ANIA_03652 ANIA_03706 ANIA_03745 ANIA_03794 ANIA_03938 ANIA_04060 ANIA_04065 ANIA_04226 ANIA_04298 ANIA_04460 ANIA_04534 ANIA_04581 ANIA_04594 ANIA_04916 ANIA_05340 ANI…
3.24905e-38	51	67	8.554	Ribosomal large subunit biogenesis	http://amigo.geneontology.org/amigo/term/GO:0042273	ANIA_00074 ANIA_00092 ANIA_00237 ANIA_00262 ANIA_00570 ANIA_00695 ANIA_00844 ANIA_00946 ANIA_01013 ANIA_01122 ANIA_01166 ANIA_01228 ANIA_01256 ANIA_01319 ANIA_01367 ANIA_01949 ANIA_02734 ANIA_02926 ANIA_03745 ANIA_03827 ANIA_04232 ANIA_04346 ANIA_04469 ANIA_04475 ANIA_04560 ANIA_05177 ANIA_05520 ANIA_05702 ANIA_05865 ANIA_05871 ANIA_06202 ANIA_06310 ANIA_06556 ANIA_06612 ANIA_06629 ANIA_06696 ANI…
4.36888e-38	61	97	7.06695	Cytosolic ribosome	http://amigo.geneontology.org/amigo/term/GO:0022626	ANIA_00262 ANIA_00433 ANIA_00445 ANIA_00465 ANIA_00570 ANIA_00776 ANIA_00843 ANIA_00907 ANIA_01013 ANIA_01122 ANIA_01166 ANIA_01228 ANIA_01256 ANIA_01345 ANIA_01964 ANIA_02275 ANIA_02734 ANIA_03096 ANIA_03172 ANIA_03413 ANIA_03706 ANIA_04060 ANIA_04073 ANIA_04087 ANIA_04163 ANIA_04202 ANIA_04222 ANIA_04475 ANIA_04494 ANIA_04560 ANIA_04594 ANIA_04787 ANIA_04794 ANIA_04803 ANIA_04916 ANIA_05014 ANI…
6.29705e-37	49	64	8.6038	Maturation of SSU-rRNA	http://amigo.geneontology.org/amigo/term/GO:0030490	ANIA_00247 ANIA_00305 ANIA_00421 ANIA_00465 ANIA_00475 ANIA_00944 ANIA_01164 ANIA_01319 ANIA_01354 ANIA_01434 ANIA_01533 ANIA_02077 ANIA_02147 ANIA_02292 ANIA_03056 ANIA_03167 ANIA_03172 ANIA_03313 ANIA_03652 ANIA_03745 ANIA_03794 ANIA_03938 ANIA_04065 ANIA_04226 ANIA_04298 ANIA_04460 ANIA_04534 ANIA_04594 ANIA_05340 ANIA_05455 ANIA_05789 ANIA_05875 ANIA_05960 ANIA_06200 ANIA_06265 ANIA_06266 ANI…
7.56972e-37	288	1588	2.06011	Gene expression	http://amigo.geneontology.org/amigo/term/GO:0010467	ANIA_00074 ANIA_00092 ANIA_00105 ANIA_00133 ANIA_00141 ANIA_00189 ANIA_00190 ANIA_00204 ANIA_00237 ANIA_00242 ANIA_00247 ANIA_00262 ANIA_00305 ANIA_00312 ANIA_00359 ANIA_00364 ANIA_00421 ANIA_00433 ANIA_00445 ANIA_00465 ANIA_00475 ANIA_00554 ANIA_00570 ANIA_00583 ANIA_00585 ANIA_00589 ANIA_00625 ANIA_00637 ANIA_00683 ANIA_00695 ANIA_00745 ANIA_00757 ANIA_00776 ANIA_00804 ANIA_00818 ANIA_00843 ANI…
6.44403e-33	153	614	2.82324	Membrane-enclosed lumen	http://amigo.geneontology.org/amigo/term/GO:0031974	ANIA_00074 ANIA_00092 ANIA_00126 ANIA_00189 ANIA_00204 ANIA_00237 ANIA_00247 ANIA_00260 ANIA_00305 ANIA_00421 ANIA_00461 ANIA_00475 ANIA_00583 ANIA_00589 ANIA_00625 ANIA_00637 ANIA_00695 ANIA_00745 ANIA_00808 ANIA_00814 ANIA_00844 ANIA_00905 ANIA_00906 ANIA_00944 ANIA_00946 ANIA_01164 ANIA_01215 ANIA_01319 ANIA_01354 ANIA_01367 ANIA_01434 ANIA_01452 ANIA_01474 ANIA_01533 ANIA_01666 ANIA_01750 ANI…
6.44403e-33	153	614	2.82324	Organelle lumen	http://amigo.geneontology.org/amigo/term/GO:0043233	ANIA_00074 ANIA_00092 ANIA_00126 ANIA_00189 ANIA_00204 ANIA_00237 ANIA_00247 ANIA_00260 ANIA_00305 ANIA_00421 ANIA_00461 ANIA_00475 ANIA_00583 ANIA_00589 ANIA_00625 ANIA_00637 ANIA_00695 ANIA_00745 ANIA_00808 ANIA_00814 ANIA_00844 ANIA_00905 ANIA_00906 ANIA_00944 ANIA_00946 ANIA_01164 ANIA_01215 ANIA_01319 ANIA_01354 ANIA_01367 ANIA_01434 ANIA_01452 ANIA_01474 ANIA_01533 ANIA_01666 ANIA_01750 ANI…
6.44403e-33	153	614	2.82324	Intracellular organelle lumen	http://amigo.geneontology.org/amigo/term/GO:0070013	ANIA_00074 ANIA_00092 ANIA_00126 ANIA_00189 ANIA_00204 ANIA_00237 ANIA_00247 ANIA_00260 ANIA_00305 ANIA_00421 ANIA_00461 ANIA_00475 ANIA_00583 ANIA_00589 ANIA_00625 ANIA_00637 ANIA_00695 ANIA_00745 ANIA_00808 ANIA_00814 ANIA_00844 ANIA_00905 ANIA_00906 ANIA_00944 ANIA_00946 ANIA_01164 ANIA_01215 ANIA_01319 ANIA_01354 ANIA_01367 ANIA_01434 ANIA_01452 ANIA_01474 ANIA_01533 ANIA_01666 ANIA_01750 ANI…
2.12874e-32	73	163	5.0328	Ribosome	http://amigo.geneontology.org/amigo/term/GO:0005840	ANIA_00262 ANIA_00433 ANIA_00445 ANIA_00465 ANIA_00570 ANIA_00776 ANIA_00843 ANIA_00907 ANIA_00997 ANIA_01013 ANIA_01122 ANIA_01166 ANIA_01228 ANIA_01256 ANIA_01345 ANIA_01954 ANIA_01964 ANIA_02275 ANIA_02734 ANIA_03096 ANIA_03172 ANIA_03413 ANIA_03635 ANIA_03706 ANIA_04060 ANIA_04073 ANIA_04087 ANIA_04163 ANIA_04202 ANIA_04222 ANIA_04452 ANIA_04475 ANIA_04494 ANIA_04560 ANIA_04594 ANIA_04652 ANI…
2.17925e-32	252	1371	2.08995	Cellular component organization or biogenesis	http://amigo.geneontology.org/amigo/term/GO:0071840	ANIA_00074 ANIA_00092 ANIA_00118 ANIA_00133 ANIA_00189 ANIA_00204 ANIA_00228 ANIA_00237 ANIA_00247 ANIA_00262 ANIA_00305 ANIA_00316 ANIA_00359 ANIA_00414 ANIA_00421 ANIA_00465 ANIA_00475 ANIA_00570 ANIA_00583 ANIA_00589 ANIA_00625 ANIA_00637 ANIA_00695 ANIA_00728 ANIA_00745 ANIA_00808 ANIA_00843 ANIA_00844 ANIA_00905 ANIA_00906 ANIA_00944 ANIA_00946 ANIA_01013 ANIA_01099 ANIA_01122 ANIA_01164 ANI…
2.11633e-31	67	142	5.30225	Ribosomal subunit	http://amigo.geneontology.org/amigo/term/GO:0044391	ANIA_00262 ANIA_00433 ANIA_00445 ANIA_00465 ANIA_00570 ANIA_00776 ANIA_00843 ANIA_00907 ANIA_01013 ANIA_01122 ANIA_01166 ANIA_01228 ANIA_01345 ANIA_01954 ANIA_01964 ANIA_02275 ANIA_02734 ANIA_03096 ANIA_03172 ANIA_03413 ANIA_03635 ANIA_03706 ANIA_04060 ANIA_04073 ANIA_04087 ANIA_04163 ANIA_04202 ANIA_04222 ANIA_04475 ANIA_04494 ANIA_04560 ANIA_04594 ANIA_04652 ANIA_04787 ANIA_04794 ANIA_04803 ANI…
2.36911e-30	79	201	4.41677	Structural molecule activity	http://amigo.geneontology.org/amigo/term/GO:0005198	ANIA_00262 ANIA_00316 ANIA_00433 ANIA_00445 ANIA_00465 ANIA_00570 ANIA_00776 ANIA_00843 ANIA_00907 ANIA_01013 ANIA_01122 ANIA_01166 ANIA_01177 ANIA_01182 ANIA_01228 ANIA_01238 ANIA_01345 ANIA_01954 ANIA_01964 ANIA_02275 ANIA_02431 ANIA_02734 ANIA_03026 ANIA_03172 ANIA_03413 ANIA_03635 ANIA_03706 ANIA_04060 ANIA_04073 ANIA_04087 ANIA_04202 ANIA_04222 ANIA_04317 ANIA_04417 ANIA_04452 ANIA_04475 ANI…
3.90758e-30	107	355	3.42571	Peptide biosynthetic process	http://amigo.geneontology.org/amigo/term/GO:0043043	ANIA_00105 ANIA_00262 ANIA_00312 ANIA_00359 ANIA_00433 ANIA_00445 ANIA_00465 ANIA_00570 ANIA_00695 ANIA_00776 ANIA_00843 ANIA_00907 ANIA_00974 ANIA_01013 ANIA_01084 ANIA_01122 ANIA_01166 ANIA_01228 ANIA_01256 ANIA_01345 ANIA_01710 ANIA_01751 ANIA_01954 ANIA_01964 ANIA_02237 ANIA_02275 ANIA_02548 ANIA_02549 ANIA_02734 ANIA_02743 ANIA_02907 ANIA_02932 ANIA_02997 ANIA_03055 ANIA_03172 ANIA_03411 ANI…
6.35711e-30	103	333	3.5075	Translation	http://amigo.geneontology.org/amigo/term/GO:0006412	ANIA_00105 ANIA_00262 ANIA_00312 ANIA_00359 ANIA_00433 ANIA_00445 ANIA_00465 ANIA_00570 ANIA_00695 ANIA_00776 ANIA_00843 ANIA_00907 ANIA_00974 ANIA_01013 ANIA_01084 ANIA_01122 ANIA_01166 ANIA_01228 ANIA_01256 ANIA_01345 ANIA_01710 ANIA_01751 ANIA_01954 ANIA_01964 ANIA_02275 ANIA_02734 ANIA_02743 ANIA_02907 ANIA_02932 ANIA_02997 ANIA_03055 ANIA_03172 ANIA_03411 ANIA_03413 ANIA_03427 ANIA_03635 ANI…
6.44567e-30	64	136	5.28829	Structural constituent of ribosome	http://amigo.geneontology.org/amigo/term/GO:0003735	ANIA_00262 ANIA_00433 ANIA_00445 ANIA_00465 ANIA_00570 ANIA_00776 ANIA_00843 ANIA_00907 ANIA_01013 ANIA_01122 ANIA_01166 ANIA_01228 ANIA_01345 ANIA_01954 ANIA_01964 ANIA_02275 ANIA_02734 ANIA_03172 ANIA_03413 ANIA_03635 ANIA_03706 ANIA_04060 ANIA_04073 ANIA_04087 ANIA_04202 ANIA_04222 ANIA_04452 ANIA_04475 ANIA_04494 ANIA_04560 ANIA_04594 ANIA_04652 ANIA_04787 ANIA_04794 ANIA_04803 ANIA_04916 ANI…
2.51433e-29	39	51	8.59347	Maturation of SSU-rRNA from tricistronic rRNA transcript (SSU-rRNA, 5.8S rRNA, LSU-rRNA)	http://amigo.geneontology.org/amigo/term/GO:0000462	ANIA_00421 ANIA_00465 ANIA_01164 ANIA_01319 ANIA_01354 ANIA_01533 ANIA_02077 ANIA_02147 ANIA_02292 ANIA_03167 ANIA_03172 ANIA_03313 ANIA_03652 ANIA_03745 ANIA_03794 ANIA_03938 ANIA_04065 ANIA_04226 ANIA_04460 ANIA_04534 ANIA_04594 ANIA_05340 ANIA_05455 ANIA_05789 ANIA_05875 ANIA_05960 ANIA_06200 ANIA_06265 ANIA_06266 ANIA_06334 ANIA_06585 ANIA_06679 ANIA_07305 ANIA_07458 ANIA_07526 ANIA_09097 ANI…
5.53808e-29	115	413	3.15972	Amide biosynthetic process	http://amigo.geneontology.org/amigo/term/GO:0043604	ANIA_00105 ANIA_00262 ANIA_00312 ANIA_00359 ANIA_00433 ANIA_00445 ANIA_00465 ANIA_00554 ANIA_00565 ANIA_00570 ANIA_00695 ANIA_00776 ANIA_00843 ANIA_00907 ANIA_00974 ANIA_01013 ANIA_01084 ANIA_01122 ANIA_01166 ANIA_01202 ANIA_01228 ANIA_01256 ANIA_01345 ANIA_01710 ANIA_01751 ANIA_01954 ANIA_01964 ANIA_02237 ANIA_02275 ANIA_02435 ANIA_02436 ANIA_02464 ANIA_02548 ANIA_02549 ANIA_02734 ANIA_02743 ANI…
1.37384e-28	273	1620	1.90907	Protein-containing complex	http://amigo.geneontology.org/amigo/term/GO:0032991	ANIA_00067 ANIA_00074 ANIA_00092 ANIA_00118 ANIA_00126 ANIA_00133 ANIA_00189 ANIA_00190 ANIA_00228 ANIA_00242 ANIA_00247 ANIA_00260 ANIA_00262 ANIA_00305 ANIA_00316 ANIA_00359 ANIA_00381 ANIA_00417 ANIA_00421 ANIA_00433 ANIA_00445 ANIA_00465 ANIA_00475 ANIA_00570 ANIA_00695 ANIA_00728 ANIA_00745 ANIA_00753 ANIA_00776 ANIA_00808 ANIA_00814 ANIA_00834 ANIA_00843 ANIA_00905 ANIA_00906 ANIA_00907 ANI…
2.12883e-26	237	1372	1.97869	Nucleic acid binding	http://amigo.geneontology.org/amigo/term/GO:0003676	ANIA_00044 ANIA_00105 ANIA_00126 ANIA_00133 ANIA_00189 ANIA_00190 ANIA_00204 ANIA_00228 ANIA_00242 ANIA_00247 ANIA_00260 ANIA_00262 ANIA_00305 ANIA_00312 ANIA_00359 ANIA_00364 ANIA_00421 ANIA_00433 ANIA_00445 ANIA_00570 ANIA_00583 ANIA_00585 ANIA_00589 ANIA_00625 ANIA_00637 ANIA_00683 ANIA_00695 ANIA_00728 ANIA_00745 ANIA_00753 ANIA_00757 ANIA_00834 ANIA_00843 ANIA_00944 ANIA_00997 ANIA_01013 ANI…
4.2233e-26	108	398	3.08036	Peptide metabolic process	http://amigo.geneontology.org/amigo/term/GO:0006518	ANIA_00105 ANIA_00262 ANIA_00312 ANIA_00359 ANIA_00433 ANIA_00445 ANIA_00465 ANIA_00570 ANIA_00695 ANIA_00776 ANIA_00843 ANIA_00907 ANIA_00974 ANIA_01013 ANIA_01084 ANIA_01122 ANIA_01166 ANIA_01228 ANIA_01256 ANIA_01345 ANIA_01710 ANIA_01751 ANIA_01954 ANIA_01964 ANIA_02237 ANIA_02275 ANIA_02548 ANIA_02549 ANIA_02734 ANIA_02743 ANIA_02907 ANIA_02932 ANIA_02997 ANIA_03055 ANIA_03172 ANIA_03411 ANI…
5.22811e-26	36	49	8.25621	Cytosolic large ribosomal subunit	http://amigo.geneontology.org/amigo/term/GO:0022625	ANIA_00262 ANIA_00433 ANIA_00445 ANIA_00570 ANIA_00776 ANIA_01013 ANIA_01122 ANIA_01166 ANIA_01228 ANIA_02275 ANIA_02734 ANIA_04202 ANIA_04222 ANIA_04475 ANIA_04494 ANIA_04560 ANIA_04787 ANIA_05014 ANIA_05520 ANIA_05702 ANIA_05719 ANIA_05800 ANIA_05996 ANIA_06202 ANIA_06500 ANIA_06629 ANIA_07003 ANIA_07107 ANIA_07354 ANIA_08176 ANIA_08704 ANIA_08856 ANIA_09465 ANIA_10416 ANIA_10681 ANIA_10740
2.75865e-22	38	66	6.67233	Ribosome	http://www.genome.jp/kegg-bin/show_pathway?ani03010	ANIA_00445 ANIA_00465 ANIA_00570 ANIA_00776 ANIA_00907 ANIA_01013 ANIA_01228 ANIA_01345 ANIA_01964 ANIA_02734 ANIA_03172 ANIA_03413 ANIA_04060 ANIA_04073 ANIA_04087 ANIA_04202 ANIA_04222 ANIA_04452 ANIA_04475 ANIA_04560 ANIA_04594 ANIA_04803 ANIA_04916 ANIA_05222 ANIA_05441 ANIA_05719 ANIA_05800 ANIA_05960 ANIA_05996 ANIA_06629 ANIA_06632 ANIA_07003 ANIA_07354 ANIA_08176 ANIA_08704 ANIA_08856 ANI…
5.03671e-22	117	504	2.64016	Cellular amide metabolic process	http://amigo.geneontology.org/amigo/term/GO:0043603	ANIA_00105 ANIA_00262 ANIA_00312 ANIA_00359 ANIA_00433 ANIA_00445 ANIA_00465 ANIA_00554 ANIA_00565 ANIA_00570 ANIA_00695 ANIA_00776 ANIA_00843 ANIA_00907 ANIA_00974 ANIA_01013 ANIA_01084 ANIA_01122 ANIA_01166 ANIA_01202 ANIA_01228 ANIA_01256 ANIA_01345 ANIA_01710 ANIA_01751 ANIA_01954 ANIA_01964 ANIA_02237 ANIA_02275 ANIA_02435 ANIA_02436 ANIA_02464 ANIA_02548 ANIA_02549 ANIA_02734 ANIA_02743 ANI…
9.04467e-22	249	1575	1.8041	Nucleic acid metabolic process	http://amigo.geneontology.org/amigo/term/GO:0090304	ANIA_00044 ANIA_00074 ANIA_00092 ANIA_00126 ANIA_00133 ANIA_00141 ANIA_00189 ANIA_00190 ANIA_00204 ANIA_00228 ANIA_00237 ANIA_00242 ANIA_00247 ANIA_00260 ANIA_00305 ANIA_00312 ANIA_00364 ANIA_00421 ANIA_00465 ANIA_00475 ANIA_00554 ANIA_00583 ANIA_00585 ANIA_00589 ANIA_00625 ANIA_00637 ANIA_00683 ANIA_00695 ANIA_00728 ANIA_00745 ANIA_00753 ANIA_00757 ANIA_00804 ANIA_00818 ANIA_00944 ANIA_00956 ANI…
7.72983e-21	220	1340	1.87152	RNA metabolic process	http://amigo.geneontology.org/amigo/term/GO:0016070	ANIA_00074 ANIA_00092 ANIA_00133 ANIA_00141 ANIA_00189 ANIA_00190 ANIA_00204 ANIA_00237 ANIA_00242 ANIA_00247 ANIA_00260 ANIA_00305 ANIA_00312 ANIA_00364 ANIA_00421 ANIA_00465 ANIA_00475 ANIA_00554 ANIA_00583 ANIA_00585 ANIA_00589 ANIA_00625 ANIA_00637 ANIA_00683 ANIA_00695 ANIA_00728 ANIA_00745 ANIA_00753 ANIA_00757 ANIA_00804 ANIA_00818 ANIA_00944 ANIA_00956 ANIA_00997 ANIA_01045 ANIA_01122 ANI…
1.37517e-20	29	40	8.14727	Ribosome assembly	http://amigo.geneontology.org/amigo/term/GO:0042255	ANIA_00262 ANIA_00421 ANIA_00843 ANIA_01013 ANIA_01166 ANIA_02734 ANIA_03172 ANIA_03706 ANIA_03745 ANIA_04060 ANIA_04232 ANIA_04475 ANIA_04560 ANIA_04652 ANIA_05960 ANIA_05997 ANIA_06202 ANIA_06310 ANIA_06632 ANIA_06902 ANIA_07305 ANIA_08491 ANIA_08704 ANIA_08834 ANIA_08856 ANIA_10055 ANIA_10058 ANIA_10200 ANIA_10955
8.70633e-20	27	36	8.42821	Small-subunit processome	http://amigo.geneontology.org/amigo/term/GO:0032040	ANIA_00305 ANIA_00475 ANIA_00745 ANIA_01164 ANIA_01319 ANIA_01354 ANIA_01434 ANIA_01533 ANIA_02077 ANIA_02147 ANIA_03167 ANIA_03413 ANIA_03794 ANIA_03938 ANIA_04226 ANIA_04298 ANIA_04456 ANIA_04460 ANIA_04916 ANIA_05340 ANIA_05455 ANIA_05875 ANIA_06171 ANIA_06265 ANIA_07458 ANIA_10052 ANIA_10352
1.29057e-19	37	71	6.02597	Cytoplasmic translation	http://amigo.geneontology.org/amigo/term/GO:0002181	ANIA_00359 ANIA_00445 ANIA_00570 ANIA_00776 ANIA_01166 ANIA_01751 ANIA_02275 ANIA_02734 ANIA_02743 ANIA_02907 ANIA_02932 ANIA_02997 ANIA_03055 ANIA_03172 ANIA_03411 ANIA_03427 ANIA_04087 ANIA_04259 ANIA_04594 ANIA_04616 ANIA_04916 ANIA_05014 ANIA_05111 ANIA_05719 ANIA_05954 ANIA_05996 ANIA_07105 ANIA_07107 ANIA_07350 ANIA_07540 ANIA_08176 ANIA_09093 ANIA_09465 ANIA_10182 ANIA_10416 ANIA_10681 ANI…
1.6244e-19	40	81	5.54944	Large ribosomal subunit	http://amigo.geneontology.org/amigo/term/GO:0015934	ANIA_00262 ANIA_00433 ANIA_00445 ANIA_00570 ANIA_00776 ANIA_01013 ANIA_01122 ANIA_01166 ANIA_01228 ANIA_02275 ANIA_02734 ANIA_03635 ANIA_04202 ANIA_04222 ANIA_04475 ANIA_04494 ANIA_04560 ANIA_04652 ANIA_04787 ANIA_05014 ANIA_05520 ANIA_05702 ANIA_05719 ANIA_05800 ANIA_05996 ANIA_06202 ANIA_06500 ANIA_06629 ANIA_07003 ANIA_07107 ANIA_07143 ANIA_07354 ANIA_08176 ANIA_08704 ANIA_08856 ANIA_09465 ANI…
8.16769e-19	287	1997	1.63218	Nucleus	http://amigo.geneontology.org/amigo/term/GO:0005634	ANIA_00044 ANIA_00067 ANIA_00074 ANIA_00092 ANIA_00105 ANIA_00126 ANIA_00133 ANIA_00189 ANIA_00190 ANIA_00204 ANIA_00228 ANIA_00237 ANIA_00242 ANIA_00247 ANIA_00260 ANIA_00305 ANIA_00310 ANIA_00312 ANIA_00364 ANIA_00421 ANIA_00461 ANIA_00475 ANIA_00554 ANIA_00583 ANIA_00585 ANIA_00589 ANIA_00625 ANIA_00637 ANIA_00695 ANIA_00728 ANIA_00745 ANIA_00757 ANIA_00808 ANIA_00814 ANIA_00818 ANIA_00822 ANI…
9.99815e-19	24	30	8.99009	Maturation of LSU-rRNA	http://amigo.geneontology.org/amigo/term/GO:0000470	ANIA_00092 ANIA_00237 ANIA_00695 ANIA_01122 ANIA_01228 ANIA_01319 ANIA_01367 ANIA_01949 ANIA_02926 ANIA_03827 ANIA_04346 ANIA_04469 ANIA_05520 ANIA_06612 ANIA_06696 ANIA_06698 ANIA_06822 ANIA_07107 ANIA_08073 ANIA_08247 ANIA_08491 ANIA_08834 ANIA_10055 ANIA_10200
1.02148e-18	47	115	4.59276	Ribonucleoprotein complex subunit organization	http://amigo.geneontology.org/amigo/term/GO:0071826	ANIA_00133 ANIA_00262 ANIA_00359 ANIA_00421 ANIA_00728 ANIA_00843 ANIA_01013 ANIA_01166 ANIA_02734 ANIA_02743 ANIA_02907 ANIA_02997 ANIA_03055 ANIA_03172 ANIA_03411 ANIA_03427 ANIA_03706 ANIA_04060 ANIA_04232 ANIA_04259 ANIA_04475 ANIA_04560 ANIA_05865 ANIA_05954 ANIA_05960 ANIA_05997 ANIA_06202 ANIA_06310 ANIA_06632 ANIA_06902 ANIA_07105 ANIA_07305 ANIA_07350 ANIA_07540 ANIA_08073 ANIA_08491 ANI…
1.27215e-18	269	1846	1.66552	Nucleobase-containing compound metabolic process	http://amigo.geneontology.org/amigo/term/GO:0006139	ANIA_00044 ANIA_00067 ANIA_00074 ANIA_00092 ANIA_00126 ANIA_00133 ANIA_00141 ANIA_00189 ANIA_00190 ANIA_00204 ANIA_00228 ANIA_00237 ANIA_00242 ANIA_00247 ANIA_00260 ANIA_00305 ANIA_00312 ANIA_00364 ANIA_00421 ANIA_00465 ANIA_00475 ANIA_00490 ANIA_00554 ANIA_00565 ANIA_00583 ANIA_00585 ANIA_00589 ANIA_00625 ANIA_00637 ANIA_00683 ANIA_00695 ANIA_00728 ANIA_00745 ANIA_00753 ANIA_00757 ANIA_00804 ANI…
1.27336e-18	46	111	4.65703	Ribonucleoprotein complex assembly	http://amigo.geneontology.org/amigo/term/GO:0022618	ANIA_00262 ANIA_00359 ANIA_00421 ANIA_00728 ANIA_00843 ANIA_01013 ANIA_01166 ANIA_02734 ANIA_02743 ANIA_02907 ANIA_02997 ANIA_03055 ANIA_03172 ANIA_03411 ANIA_03427 ANIA_03706 ANIA_04060 ANIA_04232 ANIA_04259 ANIA_04475 ANIA_04560 ANIA_05865 ANIA_05954 ANIA_05960 ANIA_05997 ANIA_06202 ANIA_06310 ANIA_06632 ANIA_06902 ANIA_07105 ANIA_07305 ANIA_07350 ANIA_07540 ANIA_08073 ANIA_08491 ANIA_08704 ANI…
7.1726e-18	67	233	3.3315	Catalytic activity, acting on RNA	http://amigo.geneontology.org/amigo/term/GO:0140098	ANIA_00092 ANIA_00141 ANIA_00189 ANIA_00190 ANIA_00204 ANIA_00228 ANIA_00260 ANIA_00583 ANIA_00589 ANIA_00625 ANIA_00637 ANIA_00745 ANIA_00757 ANIA_00818 ANIA_00944 ANIA_00956 ANIA_00997 ANIA_01474 ANIA_01710 ANIA_01723 ANIA_01750 ANIA_01751 ANIA_01949 ANIA_01957 ANIA_02135 ANIA_02185 ANIA_02283 ANIA_02415 ANIA_02457 ANIA_02717 ANIA_02735 ANIA_02747 ANIA_02847 ANIA_02932 ANIA_03033 ANIA_03176 ANI…
1.08754e-17	91	389	2.70535	Catalytic activity, acting on a nucleic acid	http://amigo.geneontology.org/amigo/term/GO:0140640	ANIA_00044 ANIA_00092 ANIA_00133 ANIA_00141 ANIA_00189 ANIA_00190 ANIA_00204 ANIA_00228 ANIA_00260 ANIA_00583 ANIA_00589 ANIA_00625 ANIA_00637 ANIA_00745 ANIA_00757 ANIA_00818 ANIA_00944 ANIA_00956 ANIA_00997 ANIA_01474 ANIA_01708 ANIA_01710 ANIA_01723 ANIA_01750 ANIA_01751 ANIA_01949 ANIA_01957 ANIA_02135 ANIA_02160 ANIA_02185 ANIA_02283 ANIA_02415 ANIA_02457 ANIA_02491 ANIA_02717 ANIA_02735 ANI…
3.201e-17	23	30	8.6155	Preribosome, large subunit precursor	http://amigo.geneontology.org/amigo/term/GO:0030687	ANIA_00074 ANIA_00092 ANIA_00946 ANIA_01175 ANIA_01367 ANIA_02926 ANIA_03745 ANIA_03827 ANIA_04232 ANIA_04469 ANIA_04560 ANIA_05865 ANIA_06310 ANIA_06556 ANIA_06612 ANIA_06822 ANIA_06902 ANIA_08073 ANIA_08247 ANIA_08491 ANIA_08834 ANIA_10055 ANIA_10200
4.85345e-17	26	39	7.49174	90S preribosome	http://amigo.geneontology.org/amigo/term/GO:0030686	ANIA_00247 ANIA_00305 ANIA_00421 ANIA_00946 ANIA_01367 ANIA_01434 ANIA_01533 ANIA_03172 ANIA_03794 ANIA_03827 ANIA_03938 ANIA_04065 ANIA_04298 ANIA_04460 ANIA_04469 ANIA_04751 ANIA_04916 ANIA_05455 ANIA_05871 ANIA_06171 ANIA_06265 ANIA_06334 ANIA_06696 ANIA_06698 ANIA_07458 ANIA_10618
1.2448e-16	278	1990	1.59472	Heterocycle metabolic process	http://amigo.geneontology.org/amigo/term/GO:0046483	ANIA_00044 ANIA_00067 ANIA_00074 ANIA_00092 ANIA_00126 ANIA_00133 ANIA_00141 ANIA_00150 ANIA_00189 ANIA_00190 ANIA_00204 ANIA_00228 ANIA_00237 ANIA_00242 ANIA_00247 ANIA_00260 ANIA_00305 ANIA_00312 ANIA_00364 ANIA_00421 ANIA_00465 ANIA_00475 ANIA_00490 ANIA_00554 ANIA_00565 ANIA_00583 ANIA_00585 ANIA_00589 ANIA_00625 ANIA_00637 ANIA_00683 ANIA_00695 ANIA_00728 ANIA_00745 ANIA_00753 ANIA_00757 ANI…
1.70729e-15	36	83	4.93359	Non-membrane-bounded organelle assembly	http://amigo.geneontology.org/amigo/term/GO:0140694	ANIA_00262 ANIA_00421 ANIA_00843 ANIA_01013 ANIA_01166 ANIA_02128 ANIA_02734 ANIA_02862 ANIA_03172 ANIA_03706 ANIA_03745 ANIA_04060 ANIA_04232 ANIA_04475 ANIA_04560 ANIA_04652 ANIA_05057 ANIA_05960 ANIA_05997 ANIA_06202 ANIA_06310 ANIA_06340 ANIA_06632 ANIA_06865 ANIA_06902 ANIA_07305 ANIA_08491 ANIA_08704 ANIA_08834 ANIA_08856 ANIA_10055 ANIA_10058 ANIA_10137 ANIA_10164 ANIA_10200 ANIA_10955
2.20611e-15	25	42	7.02351	Ribosome biogenesis in eukaryotes	http://www.genome.jp/kegg-bin/show_pathway?ani03008	ANIA_00189 ANIA_00247 ANIA_00305 ANIA_00475 ANIA_00695 ANIA_01215 ANIA_01319 ANIA_01474 ANIA_01983 ANIA_03167 ANIA_03652 ANIA_03794 ANIA_04330 ANIA_04460 ANIA_04631 ANIA_04648 ANIA_05455 ANIA_05865 ANIA_06171 ANIA_06310 ANIA_06334 ANIA_06363 ANIA_07458 ANIA_08253 ANIA_08851
2.63386e-15	24	38	7.28926	Maturation of 5.8S rRNA	http://amigo.geneontology.org/amigo/term/GO:0000460	ANIA_00092 ANIA_00237 ANIA_00421 ANIA_02147 ANIA_02926 ANIA_03167 ANIA_03172 ANIA_03652 ANIA_03745 ANIA_03827 ANIA_04065 ANIA_04412 ANIA_04469 ANIA_04617 ANIA_05789 ANIA_05875 ANIA_06244 ANIA_06612 ANIA_06822 ANIA_07305 ANIA_08247 ANIA_08834 ANIA_10055 ANIA_10618
7.7794e-14	24	41	6.57811	Cytosolic small ribosomal subunit	http://amigo.geneontology.org/amigo/term/GO:0022627	ANIA_00465 ANIA_00843 ANIA_00907 ANIA_01345 ANIA_01964 ANIA_03096 ANIA_03172 ANIA_03413 ANIA_03706 ANIA_04060 ANIA_04073 ANIA_04087 ANIA_04163 ANIA_04594 ANIA_04794 ANIA_04803 ANIA_04916 ANIA_05222 ANIA_05960 ANIA_05997 ANIA_06632 ANIA_06679 ANIA_09097 ANIA_09468
1.67138e-13	21	33	7.37468	Cleavage involved in rRNA processing	http://amigo.geneontology.org/amigo/term/GO:0000469	ANIA_00421 ANIA_00695 ANIA_01474 ANIA_03167 ANIA_03172 ANIA_03652 ANIA_03745 ANIA_04065 ANIA_04460 ANIA_04617 ANIA_05789 ANIA_05875 ANIA_06244 ANIA_06266 ANIA_06334 ANIA_06822 ANIA_07305 ANIA_08253 ANIA_08254 ANIA_10055 ANIA_10618
9.74737e-13	17	22	8.68361	Ribosomal large subunit assembly	http://amigo.geneontology.org/amigo/term/GO:0000027	ANIA_00262 ANIA_01013 ANIA_01166 ANIA_02734 ANIA_04232 ANIA_04475 ANIA_04560 ANIA_06202 ANIA_06310 ANIA_06902 ANIA_08704 ANIA_08834 ANIA_08856 ANIA_10055 ANIA_10058 ANIA_10200 ANIA_10955
2.18247e-12	28	62	5.07505	Small ribosomal subunit	http://amigo.geneontology.org/amigo/term/GO:0015935	ANIA_00465 ANIA_00843 ANIA_00907 ANIA_01345 ANIA_01954 ANIA_01964 ANIA_03096 ANIA_03172 ANIA_03413 ANIA_03706 ANIA_04060 ANIA_04073 ANIA_04087 ANIA_04163 ANIA_04594 ANIA_04794 ANIA_04803 ANIA_04916 ANIA_05222 ANIA_05441 ANIA_05960 ANIA_05997 ANIA_06632 ANIA_06679 ANIA_07143 ANIA_07699 ANIA_09097 ANIA_09468
3.54282e-12	28	69	4.99449	RNA phosphodiester bond hydrolysis, endonucleolytic	http://amigo.geneontology.org/amigo/term/GO:0090502	ANIA_00189 ANIA_00190 ANIA_00421 ANIA_00997 ANIA_01474 ANIA_01723 ANIA_02185 ANIA_02457 ANIA_02847 ANIA_03167 ANIA_03172 ANIA_03652 ANIA_03745 ANIA_04065 ANIA_04460 ANIA_04631 ANIA_05040 ANIA_05114 ANIA_05408 ANIA_05789 ANIA_05875 ANIA_06266 ANIA_06334 ANIA_06822 ANIA_07305 ANIA_08253 ANIA_10055 ANIA_10618
8.41299e-12	142	884	1.8237	Organonitrogen compound biosynthetic process	http://amigo.geneontology.org/amigo/term/GO:1901566	ANIA_00050 ANIA_00067 ANIA_00105 ANIA_00262 ANIA_00312 ANIA_00359 ANIA_00433 ANIA_00445 ANIA_00465 ANIA_00490 ANIA_00554 ANIA_00565 ANIA_00570 ANIA_00695 ANIA_00776 ANIA_00843 ANIA_00906 ANIA_00907 ANIA_00974 ANIA_01013 ANIA_01084 ANIA_01122 ANIA_01165 ANIA_01166 ANIA_01202 ANIA_01228 ANIA_01256 ANIA_01345 ANIA_01455 ANIA_01524 ANIA_01583 ANIA_01624 ANIA_01710 ANIA_01751 ANIA_01908 ANIA_01954 ANI…
1.64673e-11	196	1378	1.61954	Macromolecule biosynthetic process	http://amigo.geneontology.org/amigo/term/GO:0009059	ANIA_00105 ANIA_00228 ANIA_00260 ANIA_00262 ANIA_00312 ANIA_00359 ANIA_00364 ANIA_00433 ANIA_00445 ANIA_00465 ANIA_00554 ANIA_00570 ANIA_00585 ANIA_00683 ANIA_00695 ANIA_00776 ANIA_00843 ANIA_00907 ANIA_00974 ANIA_01013 ANIA_01084 ANIA_01122 ANIA_01166 ANIA_01205 ANIA_01228 ANIA_01256 ANIA_01345 ANIA_01366 ANIA_01455 ANIA_01678 ANIA_01710 ANIA_01751 ANIA_01929 ANIA_01954 ANIA_01962 ANIA_01964 ANI…
2.00722e-11	19	32	6.88757	Maturation of 5.8S rRNA from tricistronic rRNA transcript (SSU-rRNA, 5.8S rRNA, LSU-rRNA)	http://amigo.geneontology.org/amigo/term/GO:0000466	ANIA_00092 ANIA_00237 ANIA_00421 ANIA_02147 ANIA_02926 ANIA_03167 ANIA_03172 ANIA_03652 ANIA_03745 ANIA_03827 ANIA_04065 ANIA_04469 ANIA_04617 ANIA_05789 ANIA_05875 ANIA_06244 ANIA_07305 ANIA_10055 ANIA_10618
2.54576e-11	193	1357	1.61976	Cellular macromolecule biosynthetic process	http://amigo.geneontology.org/amigo/term/GO:0034645	ANIA_00105 ANIA_00228 ANIA_00260 ANIA_00262 ANIA_00312 ANIA_00359 ANIA_00364 ANIA_00433 ANIA_00445 ANIA_00465 ANIA_00554 ANIA_00570 ANIA_00585 ANIA_00683 ANIA_00695 ANIA_00776 ANIA_00843 ANIA_00907 ANIA_00974 ANIA_01013 ANIA_01084 ANIA_01122 ANIA_01166 ANIA_01205 ANIA_01228 ANIA_01256 ANIA_01345 ANIA_01366 ANIA_01455 ANIA_01678 ANIA_01710 ANIA_01751 ANIA_01929 ANIA_01954 ANIA_01962 ANIA_01964 ANI…
2.59615e-11	16	22	8.17281	Endonucleolytic cleavage involved in rRNA processing	http://amigo.geneontology.org/amigo/term/GO:0000478	ANIA_00421 ANIA_01474 ANIA_03167 ANIA_03172 ANIA_03652 ANIA_03745 ANIA_04065 ANIA_04460 ANIA_05789 ANIA_05875 ANIA_06266 ANIA_06334 ANIA_06822 ANIA_07305 ANIA_10055 ANIA_10618
2.96701e-11	20	35	6.42149	RRNA binding	http://amigo.geneontology.org/amigo/term/GO:0019843	ANIA_00262 ANIA_00421 ANIA_00843 ANIA_01013 ANIA_01354 ANIA_02734 ANIA_03413 ANIA_04232 ANIA_04494 ANIA_04787 ANIA_04794 ANIA_04803 ANIA_05960 ANIA_06171 ANIA_06679 ANIA_08834 ANIA_09465 ANIA_10052 ANIA_10055 ANIA_10200
3.87505e-11	14	17	9.2545	Preribosome, small subunit precursor	http://amigo.geneontology.org/amigo/term/GO:0030688	ANIA_00247 ANIA_01175 ANIA_01434 ANIA_01533 ANIA_02262 ANIA_03313 ANIA_04087 ANIA_04534 ANIA_05875 ANIA_06200 ANIA_06266 ANIA_06363 ANIA_08253 ANIA_10618
6.49476e-11	36	111	3.67776	Organelle assembly	http://amigo.geneontology.org/amigo/term/GO:0070925	ANIA_00262 ANIA_00421 ANIA_00843 ANIA_01013 ANIA_01166 ANIA_02128 ANIA_02734 ANIA_02862 ANIA_03172 ANIA_03706 ANIA_03745 ANIA_04060 ANIA_04232 ANIA_04475 ANIA_04560 ANIA_04652 ANIA_05057 ANIA_05960 ANIA_05997 ANIA_06202 ANIA_06310 ANIA_06340 ANIA_06632 ANIA_06865 ANIA_06902 ANIA_07305 ANIA_08491 ANIA_08704 ANIA_08834 ANIA_08856 ANIA_10055 ANIA_10058 ANIA_10137 ANIA_10164 ANIA_10200 ANIA_10955
7.45903e-11	116	685	1.91138	Cytosol	http://amigo.geneontology.org/amigo/term/GO:0005829	ANIA_00050 ANIA_00067 ANIA_00105 ANIA_00228 ANIA_00242 ANIA_00262 ANIA_00381 ANIA_00433 ANIA_00445 ANIA_00465 ANIA_00554 ANIA_00565 ANIA_00570 ANIA_00776 ANIA_00843 ANIA_00907 ANIA_01013 ANIA_01103 ANIA_01122 ANIA_01166 ANIA_01202 ANIA_01205 ANIA_01228 ANIA_01256 ANIA_01345 ANIA_01409 ANIA_01524 ANIA_01679 ANIA_01851 ANIA_01964 ANIA_02120 ANIA_02262 ANIA_02275 ANIA_02325 ANIA_02435 ANIA_02436 ANI…
1.15893e-10	33	103	3.86293	RNA phosphodiester bond hydrolysis	http://amigo.geneontology.org/amigo/term/GO:0090501	ANIA_00189 ANIA_00190 ANIA_00421 ANIA_00695 ANIA_00997 ANIA_01474 ANIA_01723 ANIA_02185 ANIA_02457 ANIA_02847 ANIA_03167 ANIA_03172 ANIA_03652 ANIA_03745 ANIA_04065 ANIA_04460 ANIA_04617 ANIA_04631 ANIA_05040 ANIA_05114 ANIA_05408 ANIA_05789 ANIA_05875 ANIA_06244 ANIA_06266 ANIA_06334 ANIA_06822 ANIA_07305 ANIA_08253 ANIA_08254 ANIA_10055 ANIA_10618 ANIA_10970
1.98103e-10	15	21	8.02687	Endonucleolytic cleavage of tricistronic rRNA transcript (SSU-rRNA, 5.8S rRNA, LSU-rRNA)	http://amigo.geneontology.org/amigo/term/GO:0000479	ANIA_00421 ANIA_01474 ANIA_03167 ANIA_03172 ANIA_03652 ANIA_03745 ANIA_04065 ANIA_04460 ANIA_05789 ANIA_05875 ANIA_06266 ANIA_06334 ANIA_07305 ANIA_10055 ANIA_10618
5.20946e-10	14	19	8.28035	Maturation of LSU-rRNA from tricistronic rRNA transcript (SSU-rRNA, 5.8S rRNA, LSU-rRNA)	http://amigo.geneontology.org/amigo/term/GO:0000463	ANIA_00092 ANIA_00237 ANIA_01228 ANIA_01367 ANIA_01949 ANIA_02926 ANIA_03827 ANIA_04346 ANIA_04469 ANIA_07107 ANIA_08073 ANIA_08491 ANIA_10055 ANIA_10200
5.56308e-10	15	22	7.66201	SnoRNA binding	http://amigo.geneontology.org/amigo/term/GO:0030515	ANIA_00247 ANIA_00305 ANIA_00695 ANIA_01319 ANIA_01354 ANIA_03167 ANIA_04456 ANIA_04460 ANIA_05455 ANIA_06171 ANIA_06266 ANIA_06334 ANIA_08254 ANIA_10352 ANIA_10712
6.65551e-10	12	14	9.63224	Eukaryotic translation initiation factor 3 complex	http://amigo.geneontology.org/amigo/term/GO:0005852	ANIA_00359 ANIA_01256 ANIA_02743 ANIA_02907 ANIA_02997 ANIA_03055 ANIA_04259 ANIA_05954 ANIA_07105 ANIA_07540 ANIA_10182 ANIA_10765
2.15086e-09	18	34	5.94932	ATP-dependent activity, acting on RNA	http://amigo.geneontology.org/amigo/term/GO:0008186	ANIA_00204 ANIA_00228 ANIA_00583 ANIA_00589 ANIA_00637 ANIA_00944 ANIA_01750 ANIA_01949 ANIA_02932 ANIA_03176 ANIA_04233 ANIA_04412 ANIA_04903 ANIA_05992 ANIA_06070 ANIA_06149 ANIA_06374 ANIA_10125
3.50713e-09	193	1431	1.53385	Cellular nitrogen compound biosynthetic process	http://amigo.geneontology.org/amigo/term/GO:0044271	ANIA_00067 ANIA_00105 ANIA_00260 ANIA_00262 ANIA_00312 ANIA_00359 ANIA_00364 ANIA_00433 ANIA_00445 ANIA_00465 ANIA_00490 ANIA_00554 ANIA_00565 ANIA_00570 ANIA_00585 ANIA_00683 ANIA_00695 ANIA_00776 ANIA_00843 ANIA_00907 ANIA_00974 ANIA_01013 ANIA_01084 ANIA_01122 ANIA_01166 ANIA_01202 ANIA_01205 ANIA_01228 ANIA_01256 ANIA_01345 ANIA_01366 ANIA_01524 ANIA_01624 ANIA_01678 ANIA_01710 ANIA_01751 ANI…
2.66484e-08	30	98	3.44009	RNA modification	http://amigo.geneontology.org/amigo/term/GO:0009451	ANIA_00092 ANIA_00141 ANIA_00247 ANIA_00625 ANIA_00695 ANIA_00728 ANIA_00745 ANIA_00757 ANIA_00804 ANIA_00818 ANIA_00956 ANIA_01751 ANIA_01957 ANIA_02451 ANIA_02735 ANIA_03167 ANIA_03313 ANIA_05789 ANIA_05871 ANIA_06577 ANIA_08066 ANIA_08073 ANIA_08214 ANIA_08254 ANIA_08799 ANIA_08851 ANIA_09406 ANIA_10352 ANIA_10551 ANIA_10712
6.52605e-08	38	158	2.84686	Nucleic acid phosphodiester bond hydrolysis	http://amigo.geneontology.org/amigo/term/GO:0090305	ANIA_00189 ANIA_00190 ANIA_00242 ANIA_00421 ANIA_00695 ANIA_00997 ANIA_01474 ANIA_01723 ANIA_02185 ANIA_02457 ANIA_02847 ANIA_03035 ANIA_03067 ANIA_03167 ANIA_03172 ANIA_03652 ANIA_03745 ANIA_03947 ANIA_04065 ANIA_04460 ANIA_04617 ANIA_04631 ANIA_05040 ANIA_05114 ANIA_05408 ANIA_05789 ANIA_05875 ANIA_06244 ANIA_06266 ANIA_06334 ANIA_06822 ANIA_07305 ANIA_08253 ANIA_08254 ANIA_10055 ANIA_10618 ANI…
6.77143e-08	15	28	6.02015	Cytoplasmic translational initiation	http://amigo.geneontology.org/amigo/term/GO:0002183	ANIA_00359 ANIA_02743 ANIA_02907 ANIA_02932 ANIA_02997 ANIA_03055 ANIA_03411 ANIA_03427 ANIA_04259 ANIA_05954 ANIA_07105 ANIA_07350 ANIA_07540 ANIA_10182 ANIA_10765
8.68829e-08	11	15	8.24092	Formation of cytoplasmic translation initiation complex	http://amigo.geneontology.org/amigo/term/GO:0001732	ANIA_00359 ANIA_02743 ANIA_02907 ANIA_02997 ANIA_03055 ANIA_04259 ANIA_05954 ANIA_07105 ANIA_07540 ANIA_10182 ANIA_10765
8.68829e-08	11	15	8.24092	Eukaryotic 43S preinitiation complex	http://amigo.geneontology.org/amigo/term/GO:0016282	ANIA_00359 ANIA_02743 ANIA_02907 ANIA_02997 ANIA_03055 ANIA_04259 ANIA_05954 ANIA_07105 ANIA_07540 ANIA_10182 ANIA_10765
8.68829e-08	11	15	8.24092	Eukaryotic 48S preinitiation complex	http://amigo.geneontology.org/amigo/term/GO:0033290	ANIA_00359 ANIA_02743 ANIA_02907 ANIA_02997 ANIA_03055 ANIA_04259 ANIA_05954 ANIA_07105 ANIA_07540 ANIA_10182 ANIA_10765
1.22725e-07	15	29	5.81256	RRNA modification	http://amigo.geneontology.org/amigo/term/GO:0000154	ANIA_00092 ANIA_00247 ANIA_00625 ANIA_00695 ANIA_00745 ANIA_01957 ANIA_03167 ANIA_03313 ANIA_05789 ANIA_05871 ANIA_08073 ANIA_08254 ANIA_08851 ANIA_10352 ANIA_10712
2.22748e-07	15	30	5.61881	RNA helicase activity	http://amigo.geneontology.org/amigo/term/GO:0003724	ANIA_00204 ANIA_00583 ANIA_00589 ANIA_00637 ANIA_00944 ANIA_01750 ANIA_01949 ANIA_02932 ANIA_03176 ANIA_04233 ANIA_04412 ANIA_04903 ANIA_06149 ANIA_06374 ANIA_10125
2.4403e-07	11	16	7.72586	RNA 5 -end processing	http://amigo.geneontology.org/amigo/term/GO:0000966	ANIA_00189 ANIA_00421 ANIA_00804 ANIA_03167 ANIA_03652 ANIA_04460 ANIA_06334 ANIA_06540 ANIA_07305 ANIA_10055 ANIA_10618
2.4403e-07	11	16	7.72586	Translation preinitiation complex	http://amigo.geneontology.org/amigo/term/GO:0070993	ANIA_00359 ANIA_02743 ANIA_02907 ANIA_02997 ANIA_03055 ANIA_04259 ANIA_05954 ANIA_07105 ANIA_07540 ANIA_10182 ANIA_10765
3.18231e-07	13	23	6.35169	Sno(s)RNA-containing ribonucleoprotein complex	http://amigo.geneontology.org/amigo/term/GO:0005732	ANIA_00189 ANIA_00695 ANIA_00728 ANIA_00745 ANIA_01319 ANIA_03167 ANIA_03652 ANIA_04298 ANIA_04631 ANIA_08254 ANIA_08851 ANIA_10352 ANIA_10712
3.74501e-07	15	31	5.43755	5 -3 RNA polymerase activity	http://amigo.geneontology.org/amigo/term/GO:0034062	ANIA_00260 ANIA_02135 ANIA_02283 ANIA_02415 ANIA_02717 ANIA_02747 ANIA_03033 ANIA_03933 ANIA_06558 ANIA_07608 ANIA_07609 ANIA_08272 ANIA_09102 ANIA_09125 ANIA_10970
3.74501e-07	15	31	5.43755	RNA polymerase activity	http://amigo.geneontology.org/amigo/term/GO:0097747	ANIA_00260 ANIA_02135 ANIA_02283 ANIA_02415 ANIA_02717 ANIA_02747 ANIA_03033 ANIA_03933 ANIA_06558 ANIA_07608 ANIA_07609 ANIA_08272 ANIA_09102 ANIA_09125 ANIA_10970
6.33902e-07	57	307	2.14229	ATP-dependent activity	http://amigo.geneontology.org/amigo/term/GO:0140657	ANIA_00044 ANIA_00118 ANIA_00126 ANIA_00133 ANIA_00204 ANIA_00228 ANIA_00404 ANIA_00583 ANIA_00589 ANIA_00637 ANIA_00944 ANIA_01256 ANIA_01366 ANIA_01624 ANIA_01628 ANIA_01708 ANIA_01750 ANIA_01949 ANIA_02160 ANIA_02210 ANIA_02491 ANIA_02932 ANIA_02969 ANIA_03124 ANIA_03176 ANIA_03721 ANIA_03749 ANIA_04233 ANIA_04412 ANIA_04513 ANIA_04616 ANIA_04659 ANIA_04664 ANIA_04706 ANIA_04903 ANIA_05406 ANI…
6.55113e-07	10	14	8.02687	Endonucleolytic cleavage in ITS1 to separate SSU-rRNA from 5.8S rRNA and LSU-rRNA from tricistronic rRNA transcript (SSU-rRNA, 5.8S rRNA, LSU-rRNA)	http://amigo.geneontology.org/amigo/term/GO:0000447	ANIA_00421 ANIA_03167 ANIA_03172 ANIA_03652 ANIA_03745 ANIA_04065 ANIA_05789 ANIA_05875 ANIA_07305 ANIA_10618
1.15534e-06	13	28	5.84356	RRNA-containing ribonucleoprotein complex export from nucleus	http://amigo.geneontology.org/amigo/term/GO:0071428	ANIA_00843 ANIA_00844 ANIA_01256 ANIA_02210 ANIA_02262 ANIA_03172 ANIA_03413 ANIA_03745 ANIA_04087 ANIA_05789 ANIA_05865 ANIA_07143 ANIA_10618
1.15534e-06	14	29	5.42505	DNA-directed 5 -3 RNA polymerase activity	http://amigo.geneontology.org/amigo/term/GO:0003899	ANIA_00260 ANIA_02135 ANIA_02283 ANIA_02415 ANIA_02747 ANIA_03033 ANIA_03933 ANIA_06558 ANIA_07608 ANIA_07609 ANIA_08272 ANIA_09102 ANIA_09125 ANIA_10970
1.75188e-06	10	15	7.49174	NcRNA 5 -end processing	http://amigo.geneontology.org/amigo/term/GO:0034471	ANIA_00189 ANIA_00421 ANIA_00804 ANIA_03167 ANIA_03652 ANIA_04460 ANIA_06334 ANIA_07305 ANIA_10055 ANIA_10618
1.94879e-06	14	30	5.24422	RNA secondary structure unwinding	http://amigo.geneontology.org/amigo/term/GO:0010501	ANIA_00204 ANIA_00583 ANIA_00589 ANIA_00637 ANIA_00944 ANIA_01750 ANIA_01949 ANIA_02932 ANIA_03176 ANIA_04233 ANIA_04903 ANIA_06149 ANIA_06374 ANIA_10125
2.09107e-06	16	39	4.6103	RNA methylation	http://amigo.geneontology.org/amigo/term/GO:0001510	ANIA_00092 ANIA_00141 ANIA_00625 ANIA_00745 ANIA_00757 ANIA_01751 ANIA_01957 ANIA_02735 ANIA_03313 ANIA_05789 ANIA_05871 ANIA_06577 ANIA_08066 ANIA_08073 ANIA_08799 ANIA_09406
2.64517e-06	15	35	4.81612	RNA methyltransferase activity	http://amigo.geneontology.org/amigo/term/GO:0008173	ANIA_00092 ANIA_00141 ANIA_00625 ANIA_00745 ANIA_00757 ANIA_01751 ANIA_01957 ANIA_02735 ANIA_03313 ANIA_05789 ANIA_05871 ANIA_08066 ANIA_08073 ANIA_08799 ANIA_09406
2.97777e-06	166	1286	1.45966	Protein metabolic process	http://amigo.geneontology.org/amigo/term/GO:0019538	ANIA_00044 ANIA_00105 ANIA_00262 ANIA_00312 ANIA_00359 ANIA_00433 ANIA_00445 ANIA_00465 ANIA_00570 ANIA_00695 ANIA_00745 ANIA_00776 ANIA_00814 ANIA_00822 ANIA_00843 ANIA_00905 ANIA_00906 ANIA_00907 ANIA_00974 ANIA_01013 ANIA_01084 ANIA_01122 ANIA_01166 ANIA_01228 ANIA_01256 ANIA_01345 ANIA_01455 ANIA_01560 ANIA_01583 ANIA_01710 ANIA_01751 ANIA_01905 ANIA_01954 ANIA_01964 ANIA_02054 ANIA_02137 ANI…
3.62124e-06	25	90	3.15663	Helicase activity	http://amigo.geneontology.org/amigo/term/GO:0004386	ANIA_00044 ANIA_00133 ANIA_00204 ANIA_00228 ANIA_00583 ANIA_00589 ANIA_00637 ANIA_00944 ANIA_01750 ANIA_01949 ANIA_02491 ANIA_02932 ANIA_03176 ANIA_04233 ANIA_04412 ANIA_04903 ANIA_05992 ANIA_06070 ANIA_06149 ANIA_06374 ANIA_06585 ANIA_07538 ANIA_07994 ANIA_10125 ANIA_10497
4.00257e-06	15	36	4.68234	Viral nucleocapsid	http://amigo.geneontology.org/amigo/term/GO:0019013	ANIA_00305 ANIA_00475 ANIA_00695 ANIA_01983 ANIA_03794 ANIA_04226 ANIA_04298 ANIA_04456 ANIA_04460 ANIA_04648 ANIA_05340 ANIA_06171 ANIA_06265 ANIA_07458 ANIA_10848
4.00257e-06	15	36	4.68234	Viral capsid	http://amigo.geneontology.org/amigo/term/GO:0019028	ANIA_00305 ANIA_00475 ANIA_00695 ANIA_01983 ANIA_03794 ANIA_04226 ANIA_04298 ANIA_04456 ANIA_04460 ANIA_04648 ANIA_05340 ANIA_06171 ANIA_06265 ANIA_07458 ANIA_10848
4.76137e-06	9	13	7.77989	Ribosomal small subunit assembly	http://amigo.geneontology.org/amigo/term/GO:0000028	ANIA_00421 ANIA_00843 ANIA_03172 ANIA_03706 ANIA_04060 ANIA_05960 ANIA_05997 ANIA_06632 ANIA_07305
4.85692e-06	150	1141	1.48384	Cellular protein metabolic process	http://amigo.geneontology.org/amigo/term/GO:0044267	ANIA_00044 ANIA_00105 ANIA_00262 ANIA_00312 ANIA_00359 ANIA_00433 ANIA_00445 ANIA_00465 ANIA_00570 ANIA_00695 ANIA_00745 ANIA_00776 ANIA_00814 ANIA_00822 ANIA_00843 ANIA_00905 ANIA_00906 ANIA_00907 ANIA_00974 ANIA_01013 ANIA_01084 ANIA_01122 ANIA_01166 ANIA_01228 ANIA_01256 ANIA_01345 ANIA_01455 ANIA_01560 ANIA_01710 ANIA_01751 ANIA_01905 ANIA_01954 ANIA_01964 ANIA_02054 ANIA_02137 ANIA_02237 ANI…
6.00711e-06	15	37	4.55579	Virion component	http://amigo.geneontology.org/amigo/term/GO:0044423	ANIA_00305 ANIA_00475 ANIA_00695 ANIA_01983 ANIA_03794 ANIA_04226 ANIA_04298 ANIA_04456 ANIA_04460 ANIA_04648 ANIA_05340 ANIA_06171 ANIA_06265 ANIA_07458 ANIA_10848
6.05537e-06	67	408	1.8823	Protein-containing complex subunit organization	http://amigo.geneontology.org/amigo/term/GO:0043933	ANIA_00133 ANIA_00228 ANIA_00262 ANIA_00316 ANIA_00359 ANIA_00421 ANIA_00728 ANIA_00843 ANIA_00906 ANIA_01013 ANIA_01166 ANIA_01182 ANIA_01256 ANIA_02283 ANIA_02491 ANIA_02734 ANIA_02743 ANIA_02907 ANIA_02997 ANIA_03055 ANIA_03067 ANIA_03172 ANIA_03411 ANIA_03427 ANIA_03706 ANIA_04060 ANIA_04232 ANIA_04259 ANIA_04417 ANIA_04475 ANIA_04513 ANIA_04560 ANIA_05007 ANIA_05865 ANIA_05954 ANIA_05960 ANI…
6.90155e-06	24	86	3.13608	Translation regulator activity	http://amigo.geneontology.org/amigo/term/GO:0045182	ANIA_00105 ANIA_00312 ANIA_00359 ANIA_01084 ANIA_02743 ANIA_02907 ANIA_02932 ANIA_02997 ANIA_03055 ANIA_03411 ANIA_03832 ANIA_04259 ANIA_05111 ANIA_05954 ANIA_06563 ANIA_06651 ANIA_06700 ANIA_07105 ANIA_07350 ANIA_07540 ANIA_08066 ANIA_09093 ANIA_10182 ANIA_10765
1.23663e-05	26	104	2.89285	Nuclear transport	http://amigo.geneontology.org/amigo/term/GO:0051169	ANIA_00843 ANIA_00844 ANIA_00906 ANIA_01238 ANIA_01256 ANIA_02120 ANIA_02210 ANIA_02262 ANIA_02431 ANIA_03172 ANIA_03413 ANIA_03745 ANIA_04087 ANIA_04417 ANIA_05717 ANIA_05789 ANIA_05865 ANIA_06006 ANIA_06507 ANIA_06591 ANIA_06651 ANIA_06738 ANIA_07143 ANIA_10002 ANIA_10112 ANIA_10618
1.23663e-05	6	6	11.2376	MCM complex	http://amigo.geneontology.org/amigo/term/GO:0042555	ANIA_00228 ANIA_02491 ANIA_05992 ANIA_06070 ANIA_07994 ANIA_10497
1.23663e-05	6	6	11.2376	Eukaryotic translation initiation factor 3 complex, eIF3m	http://amigo.geneontology.org/amigo/term/GO:0071541	ANIA_02743 ANIA_02997 ANIA_04259 ANIA_07540 ANIA_10182 ANIA_10765
1.23663e-05	6	6	11.2376	U3 snoRNA binding	http://amigo.geneontology.org/amigo/term/GO:0034511	ANIA_01319 ANIA_01354 ANIA_04456 ANIA_04460 ANIA_06266 ANIA_06334
1.23663e-05	26	104	2.89285	Nucleocytoplasmic transport	http://amigo.geneontology.org/amigo/term/GO:0006913	ANIA_00843 ANIA_00844 ANIA_00906 ANIA_01238 ANIA_01256 ANIA_02120 ANIA_02210 ANIA_02262 ANIA_02431 ANIA_03172 ANIA_03413 ANIA_03745 ANIA_04087 ANIA_04417 ANIA_05717 ANIA_05789 ANIA_05865 ANIA_06006 ANIA_06507 ANIA_06591 ANIA_06651 ANIA_06738 ANIA_07143 ANIA_10002 ANIA_10112 ANIA_10618
1.66668e-05	23	84	3.07697	Macromolecule methylation	http://amigo.geneontology.org/amigo/term/GO:0043414	ANIA_00092 ANIA_00141 ANIA_00625 ANIA_00745 ANIA_00757 ANIA_01751 ANIA_01905 ANIA_01957 ANIA_02735 ANIA_03096 ANIA_03313 ANIA_05789 ANIA_05871 ANIA_05998 ANIA_06072 ANIA_06162 ANIA_06577 ANIA_08066 ANIA_08073 ANIA_08799 ANIA_09406 ANIA_10526 ANIA_10583
1.66668e-05	22	78	3.16958	Translation factor activity, RNA binding	http://amigo.geneontology.org/amigo/term/GO:0008135	ANIA_00105 ANIA_00312 ANIA_00359 ANIA_01084 ANIA_02743 ANIA_02907 ANIA_02932 ANIA_02997 ANIA_03055 ANIA_03411 ANIA_03832 ANIA_04259 ANIA_05954 ANIA_06563 ANIA_06651 ANIA_06700 ANIA_07105 ANIA_07350 ANIA_07540 ANIA_08066 ANIA_10182 ANIA_10765
1.82022e-05	58	345	1.92266	Cellular protein-containing complex assembly	http://amigo.geneontology.org/amigo/term/GO:0034622	ANIA_00228 ANIA_00262 ANIA_00316 ANIA_00359 ANIA_00421 ANIA_00728 ANIA_00843 ANIA_00906 ANIA_01013 ANIA_01166 ANIA_02283 ANIA_02491 ANIA_02734 ANIA_02743 ANIA_02907 ANIA_02997 ANIA_03055 ANIA_03067 ANIA_03172 ANIA_03411 ANIA_03427 ANIA_03706 ANIA_04060 ANIA_04232 ANIA_04259 ANIA_04475 ANIA_04560 ANIA_05007 ANIA_05865 ANIA_05954 ANIA_05960 ANIA_05992 ANIA_05997 ANIA_06070 ANIA_06202 ANIA_06310 ANI…
1.8348e-05	98	691	1.61716	Purine ribonucleoside triphosphate binding	http://amigo.geneontology.org/amigo/term/GO:0035639	ANIA_00044 ANIA_00118 ANIA_00126 ANIA_00133 ANIA_00204 ANIA_00228 ANIA_00247 ANIA_00316 ANIA_00381 ANIA_00404 ANIA_00490 ANIA_00565 ANIA_00583 ANIA_00589 ANIA_00637 ANIA_00804 ANIA_00822 ANIA_00944 ANIA_01084 ANIA_01182 ANIA_01215 ANIA_01256 ANIA_01366 ANIA_01394 ANIA_01408 ANIA_01560 ANIA_01628 ANIA_01666 ANIA_01708 ANIA_01710 ANIA_01750 ANIA_01851 ANIA_01949 ANIA_01956 ANIA_02210 ANIA_02436 ANI…
2.06518e-05	22	79	3.12946	Translation regulator activity, nucleic acid binding	http://amigo.geneontology.org/amigo/term/GO:0090079	ANIA_00105 ANIA_00312 ANIA_00359 ANIA_01084 ANIA_02743 ANIA_02907 ANIA_02932 ANIA_02997 ANIA_03055 ANIA_03411 ANIA_03832 ANIA_04259 ANIA_05954 ANIA_06563 ANIA_06651 ANIA_06700 ANIA_07105 ANIA_07350 ANIA_07540 ANIA_08066 ANIA_10182 ANIA_10765
2.37614e-05	40	208	2.22527	Nucleoside-triphosphatase activity	http://amigo.geneontology.org/amigo/term/GO:0017111	ANIA_00118 ANIA_00126 ANIA_00316 ANIA_00404 ANIA_01084 ANIA_01182 ANIA_01215 ANIA_01256 ANIA_01366 ANIA_01394 ANIA_01408 ANIA_01624 ANIA_01628 ANIA_01666 ANIA_02210 ANIA_03124 ANIA_03721 ANIA_03832 ANIA_04513 ANIA_04616 ANIA_04667 ANIA_04685 ANIA_04708 ANIA_05020 ANIA_05992 ANIA_06070 ANIA_06266 ANIA_06310 ANIA_06334 ANIA_06340 ANIA_06651 ANIA_06688 ANIA_06700 ANIA_06838 ANIA_06863 ANIA_07464 ANI…
3.4098e-05	44	242	2.10406	Hydrolase activity, acting on acid anhydrides, in phosphorus-containing anhydrides	http://amigo.geneontology.org/amigo/term/GO:0016818	ANIA_00044 ANIA_00118 ANIA_00126 ANIA_00316 ANIA_00404 ANIA_01084 ANIA_01182 ANIA_01202 ANIA_01215 ANIA_01256 ANIA_01366 ANIA_01394 ANIA_01408 ANIA_01624 ANIA_01628 ANIA_01666 ANIA_02210 ANIA_03124 ANIA_03721 ANIA_03832 ANIA_04513 ANIA_04616 ANIA_04667 ANIA_04685 ANIA_04708 ANIA_05020 ANIA_05566 ANIA_05992 ANIA_06070 ANIA_06266 ANIA_06310 ANIA_06334 ANIA_06340 ANIA_06651 ANIA_06688 ANIA_06700 ANI…
3.47653e-05	99	710	1.58932	Purine nucleotide binding	http://amigo.geneontology.org/amigo/term/GO:0017076	ANIA_00044 ANIA_00118 ANIA_00126 ANIA_00133 ANIA_00204 ANIA_00228 ANIA_00247 ANIA_00316 ANIA_00381 ANIA_00404 ANIA_00490 ANIA_00565 ANIA_00583 ANIA_00589 ANIA_00637 ANIA_00804 ANIA_00822 ANIA_00944 ANIA_01084 ANIA_01182 ANIA_01215 ANIA_01256 ANIA_01366 ANIA_01394 ANIA_01408 ANIA_01560 ANIA_01628 ANIA_01666 ANIA_01708 ANIA_01710 ANIA_01750 ANIA_01851 ANIA_01949 ANIA_01956 ANIA_02210 ANIA_02436 ANI…
3.61487e-05	43	235	2.11937	Pyrophosphatase activity	http://amigo.geneontology.org/amigo/term/GO:0016462	ANIA_00118 ANIA_00126 ANIA_00316 ANIA_00404 ANIA_01084 ANIA_01182 ANIA_01202 ANIA_01215 ANIA_01256 ANIA_01366 ANIA_01394 ANIA_01408 ANIA_01624 ANIA_01628 ANIA_01666 ANIA_02210 ANIA_03124 ANIA_03721 ANIA_03832 ANIA_04513 ANIA_04616 ANIA_04667 ANIA_04685 ANIA_04708 ANIA_05020 ANIA_05566 ANIA_05992 ANIA_06070 ANIA_06266 ANIA_06310 ANIA_06334 ANIA_06340 ANIA_06651 ANIA_06688 ANIA_06700 ANIA_06838 ANI…
3.75227e-05	58	353	1.87833	Protein-containing complex assembly	http://amigo.geneontology.org/amigo/term/GO:0065003	ANIA_00228 ANIA_00262 ANIA_00316 ANIA_00359 ANIA_00421 ANIA_00728 ANIA_00843 ANIA_00906 ANIA_01013 ANIA_01166 ANIA_02283 ANIA_02491 ANIA_02734 ANIA_02743 ANIA_02907 ANIA_02997 ANIA_03055 ANIA_03067 ANIA_03172 ANIA_03411 ANIA_03427 ANIA_03706 ANIA_04060 ANIA_04232 ANIA_04259 ANIA_04475 ANIA_04560 ANIA_05007 ANIA_05865 ANIA_05954 ANIA_05960 ANIA_05992 ANIA_05997 ANIA_06070 ANIA_06202 ANIA_06310 ANI…
4.70416e-05	44	245	2.07754	Hydrolase activity, acting on acid anhydrides	http://amigo.geneontology.org/amigo/term/GO:0016817	ANIA_00044 ANIA_00118 ANIA_00126 ANIA_00316 ANIA_00404 ANIA_01084 ANIA_01182 ANIA_01202 ANIA_01215 ANIA_01256 ANIA_01366 ANIA_01394 ANIA_01408 ANIA_01624 ANIA_01628 ANIA_01666 ANIA_02210 ANIA_03124 ANIA_03721 ANIA_03832 ANIA_04513 ANIA_04616 ANIA_04667 ANIA_04685 ANIA_04708 ANIA_05020 ANIA_05566 ANIA_05992 ANIA_06070 ANIA_06266 ANIA_06310 ANIA_06334 ANIA_06340 ANIA_06651 ANIA_06688 ANIA_06700 ANI…
4.83432e-05	25	103	2.75432	Posttranscriptional regulation of gene expression	http://amigo.geneontology.org/amigo/term/GO:0010608	ANIA_00974 ANIA_00997 ANIA_01256 ANIA_02717 ANIA_03055 ANIA_03411 ANIA_03413 ANIA_04000 ANIA_04163 ANIA_04202 ANIA_04617 ANIA_04803 ANIA_05111 ANIA_05408 ANIA_06244 ANIA_06507 ANIA_06540 ANIA_06651 ANIA_07554 ANIA_09090 ANIA_09093 ANIA_10164 ANIA_10173 ANIA_10182 ANIA_10315
4.9035e-05	98	707	1.58004	Purine ribonucleotide binding	http://amigo.geneontology.org/amigo/term/GO:0032555	ANIA_00044 ANIA_00118 ANIA_00126 ANIA_00133 ANIA_00204 ANIA_00228 ANIA_00247 ANIA_00316 ANIA_00381 ANIA_00404 ANIA_00490 ANIA_00565 ANIA_00583 ANIA_00589 ANIA_00637 ANIA_00804 ANIA_00822 ANIA_00944 ANIA_01084 ANIA_01182 ANIA_01215 ANIA_01256 ANIA_01366 ANIA_01394 ANIA_01408 ANIA_01560 ANIA_01628 ANIA_01666 ANIA_01708 ANIA_01710 ANIA_01750 ANIA_01851 ANIA_01949 ANIA_01956 ANIA_02210 ANIA_02436 ANI…
4.9035e-05	9	18	6.32116	RNA polymerase	http://www.genome.jp/kegg-bin/show_pathway?ani03020	ANIA_02135 ANIA_02283 ANIA_02415 ANIA_02747 ANIA_03933 ANIA_06558 ANIA_08272 ANIA_09102 ANIA_10315
5.90229e-05	22	85	2.94318	MRNA binding	http://amigo.geneontology.org/amigo/term/GO:0003729	ANIA_00745 ANIA_00753 ANIA_00843 ANIA_01228 ANIA_02068 ANIA_02743 ANIA_03411 ANIA_04000 ANIA_04202 ANIA_04865 ANIA_05111 ANIA_05960 ANIA_06507 ANIA_06556 ANIA_06600 ANIA_07480 ANIA_07540 ANIA_09090 ANIA_09093 ANIA_10164 ANIA_10173 ANIA_10848
6.31998e-05	12	29	4.65005	DNA replication initiation	http://amigo.geneontology.org/amigo/term/GO:0006270	ANIA_00228 ANIA_02491 ANIA_03067 ANIA_04771 ANIA_05676 ANIA_05992 ANIA_06070 ANIA_06896 ANIA_07994 ANIA_10497 ANIA_10755 ANIA_10855
6.90097e-05	6	7	9.63224	Primary alcohol catabolic process	http://amigo.geneontology.org/amigo/term/GO:0034310	ANIA_00554 ANIA_05226 ANIA_08978 ANIA_08979 ANIA_08980 ANIA_08981
6.90097e-05	6	7	9.63224	Ethanol catabolic process	http://amigo.geneontology.org/amigo/term/GO:0006068	ANIA_00554 ANIA_05226 ANIA_08978 ANIA_08979 ANIA_08980 ANIA_08981
8.8284e-05	7	10	7.86633	RRNA 5 -end processing	http://amigo.geneontology.org/amigo/term/GO:0000967	ANIA_00421 ANIA_03167 ANIA_04460 ANIA_06334 ANIA_07305 ANIA_10055 ANIA_10618
8.93145e-05	15	45	3.74587	Ribonucleoprotein complex binding	http://amigo.geneontology.org/amigo/term/GO:0043021	ANIA_01256 ANIA_01366 ANIA_01367 ANIA_03055 ANIA_03096 ANIA_03427 ANIA_03827 ANIA_04163 ANIA_04469 ANIA_05719 ANIA_06651 ANIA_07143 ANIA_07350 ANIA_07721 ANIA_10315
0.000106079	28	128	2.47758	Microtubule cytoskeleton	http://amigo.geneontology.org/amigo/term/GO:0015630	ANIA_00118 ANIA_00316 ANIA_01099 ANIA_01182 ANIA_01394 ANIA_01560 ANIA_01953 ANIA_02128 ANIA_02862 ANIA_02927 ANIA_03124 ANIA_03721 ANIA_04417 ANIA_04513 ANIA_04664 ANIA_04667 ANIA_05057 ANIA_05815 ANIA_06340 ANIA_06688 ANIA_06838 ANIA_06863 ANIA_06865 ANIA_08182 ANIA_08783 ANIA_08851 ANIA_10137 ANIA_11166
0.000114235	17	57	3.35157	Translation initiation factor activity	http://amigo.geneontology.org/amigo/term/GO:0003743	ANIA_00105 ANIA_00312 ANIA_00359 ANIA_02743 ANIA_02907 ANIA_02932 ANIA_02997 ANIA_03055 ANIA_03411 ANIA_04259 ANIA_05954 ANIA_07105 ANIA_07350 ANIA_07540 ANIA_08066 ANIA_10182 ANIA_10765
0.000146797	10	25	5.10801	Ribosome localization	http://amigo.geneontology.org/amigo/term/GO:0033750	ANIA_00844 ANIA_01256 ANIA_02210 ANIA_02262 ANIA_03745 ANIA_04087 ANIA_05789 ANIA_05865 ANIA_07143 ANIA_10618
0.000146797	10	25	5.10801	Ribosomal subunit export from nucleus	http://amigo.geneontology.org/amigo/term/GO:0000054	ANIA_00844 ANIA_01256 ANIA_02210 ANIA_02262 ANIA_03745 ANIA_04087 ANIA_05789 ANIA_05865 ANIA_07143 ANIA_10618
0.000146797	10	23	5.10801	Single-stranded RNA binding	http://amigo.geneontology.org/amigo/term/GO:0003727	ANIA_00228 ANIA_03427 ANIA_03745 ANIA_04000 ANIA_05111 ANIA_05992 ANIA_06070 ANIA_07350 ANIA_09093 ANIA_10200
0.000157181	15	53	3.58647	Endoribonuclease activity	http://amigo.geneontology.org/amigo/term/GO:0004521	ANIA_00189 ANIA_00190 ANIA_00997 ANIA_01474 ANIA_01723 ANIA_02185 ANIA_02457 ANIA_02847 ANIA_03652 ANIA_04067 ANIA_04631 ANIA_05040 ANIA_05114 ANIA_05408 ANIA_08253
0.000159417	9	21	5.61881	DNA replication	http://www.genome.jp/kegg-bin/show_pathway?ani03030	ANIA_00260 ANIA_03033 ANIA_03067 ANIA_05114 ANIA_05992 ANIA_06070 ANIA_06300 ANIA_07493 ANIA_07994
0.00018192	19	71	3.00725	Translational initiation	http://amigo.geneontology.org/amigo/term/GO:0006413	ANIA_00105 ANIA_00312 ANIA_00359 ANIA_01256 ANIA_02743 ANIA_02907 ANIA_02932 ANIA_02997 ANIA_03055 ANIA_03411 ANIA_03427 ANIA_04259 ANIA_05954 ANIA_07105 ANIA_07350 ANIA_07540 ANIA_08066 ANIA_10182 ANIA_10765
0.000191618	103	779	1.50909	Carbohydrate derivative binding	http://amigo.geneontology.org/amigo/term/GO:0097367	ANIA_00044 ANIA_00118 ANIA_00126 ANIA_00133 ANIA_00204 ANIA_00228 ANIA_00247 ANIA_00316 ANIA_00381 ANIA_00404 ANIA_00490 ANIA_00549 ANIA_00565 ANIA_00583 ANIA_00589 ANIA_00637 ANIA_00804 ANIA_00822 ANIA_00944 ANIA_01084 ANIA_01182 ANIA_01215 ANIA_01256 ANIA_01366 ANIA_01394 ANIA_01408 ANIA_01560 ANIA_01628 ANIA_01666 ANIA_01708 ANIA_01710 ANIA_01750 ANIA_01851 ANIA_01949 ANIA_01956 ANIA_02210 ANI…
0.000206847	7	11	7.15121	RNA polymerase I complex	http://amigo.geneontology.org/amigo/term/GO:0005736	ANIA_02283 ANIA_02415 ANIA_02747 ANIA_03933 ANIA_06558 ANIA_09102 ANIA_10970
0.000227377	6	8	8.42821	Endonucleolytic cleavage in 5 -ETS of tricistronic rRNA transcript (SSU-rRNA, 5.8S rRNA, LSU-rRNA)	http://amigo.geneontology.org/amigo/term/GO:0000480	ANIA_00421 ANIA_03167 ANIA_04460 ANIA_06334 ANIA_07305 ANIA_10618
0.000227377	6	8	8.42821	Pre-replicative complex assembly	http://amigo.geneontology.org/amigo/term/GO:0036388	ANIA_00228 ANIA_02491 ANIA_05992 ANIA_06070 ANIA_07994 ANIA_10497
0.000227377	6	8	8.42821	Pre-replicative complex assembly involved in nuclear cell cycle DNA replication	http://amigo.geneontology.org/amigo/term/GO:0006267	ANIA_00228 ANIA_02491 ANIA_05992 ANIA_06070 ANIA_07994 ANIA_10497
0.000227377	6	8	8.42821	Pre-replicative complex assembly involved in cell cycle DNA replication	http://amigo.geneontology.org/amigo/term/GO:1902299	ANIA_00228 ANIA_02491 ANIA_05992 ANIA_06070 ANIA_07994 ANIA_10497
0.000231238	51	313	1.84282	Cell cycle process	http://amigo.geneontology.org/amigo/term/GO:0022402	ANIA_00055 ANIA_00118 ANIA_00228 ANIA_00414 ANIA_00808 ANIA_00905 ANIA_01182 ANIA_01394 ANIA_01560 ANIA_01708 ANIA_02059 ANIA_02128 ANIA_02137 ANIA_02160 ANIA_02491 ANIA_02511 ANIA_02755 ANIA_02862 ANIA_02927 ANIA_02969 ANIA_03067 ANIA_03795 ANIA_03941 ANIA_03946 ANIA_04417 ANIA_04513 ANIA_04571 ANIA_04667 ANIA_05028 ANIA_05057 ANIA_05406 ANIA_05676 ANIA_05717 ANIA_05815 ANIA_05992 ANIA_06070 ANI…
0.00030621	60	392	1.72886	Cell cycle	http://amigo.geneontology.org/amigo/term/GO:0007049	ANIA_00055 ANIA_00118 ANIA_00228 ANIA_00316 ANIA_00414 ANIA_00808 ANIA_00905 ANIA_01182 ANIA_01394 ANIA_01560 ANIA_01660 ANIA_01708 ANIA_02054 ANIA_02059 ANIA_02128 ANIA_02137 ANIA_02160 ANIA_02491 ANIA_02511 ANIA_02755 ANIA_02862 ANIA_02927 ANIA_02969 ANIA_03067 ANIA_03411 ANIA_03674 ANIA_03795 ANIA_03941 ANIA_03946 ANIA_04417 ANIA_04513 ANIA_04571 ANIA_04667 ANIA_05028 ANIA_05057 ANIA_05406 ANI…
0.000316403	23	104	2.58465	Nucleotidyltransferase activity	http://amigo.geneontology.org/amigo/term/GO:0016779	ANIA_00260 ANIA_00804 ANIA_02135 ANIA_02283 ANIA_02415 ANIA_02717 ANIA_02747 ANIA_03033 ANIA_03067 ANIA_03419 ANIA_03933 ANIA_03944 ANIA_06558 ANIA_07608 ANIA_07609 ANIA_08272 ANIA_09094 ANIA_09102 ANIA_09125 ANIA_10470 ANIA_10755 ANIA_10855 ANIA_10970
0.000322528	19	77	2.88533	Nuclear export	http://amigo.geneontology.org/amigo/term/GO:0051168	ANIA_00843 ANIA_00844 ANIA_01256 ANIA_02210 ANIA_02262 ANIA_03172 ANIA_03413 ANIA_03745 ANIA_04087 ANIA_05717 ANIA_05789 ANIA_05865 ANIA_06507 ANIA_06591 ANIA_06651 ANIA_06738 ANIA_07143 ANIA_10112 ANIA_10618
0.000322528	98	742	1.50655	Ribonucleotide binding	http://amigo.geneontology.org/amigo/term/GO:0032553	ANIA_00044 ANIA_00118 ANIA_00126 ANIA_00133 ANIA_00204 ANIA_00228 ANIA_00247 ANIA_00316 ANIA_00381 ANIA_00404 ANIA_00490 ANIA_00565 ANIA_00583 ANIA_00589 ANIA_00637 ANIA_00804 ANIA_00822 ANIA_00944 ANIA_01084 ANIA_01182 ANIA_01215 ANIA_01256 ANIA_01366 ANIA_01394 ANIA_01408 ANIA_01560 ANIA_01628 ANIA_01666 ANIA_01708 ANIA_01710 ANIA_01750 ANIA_01851 ANIA_01949 ANIA_01956 ANIA_02210 ANIA_02436 ANI…
0.000352028	22	94	2.63008	S-adenosylmethionine-dependent methyltransferase activity	http://amigo.geneontology.org/amigo/term/GO:0008757	ANIA_00092 ANIA_00141 ANIA_00625 ANIA_00745 ANIA_00757 ANIA_00761 ANIA_01957 ANIA_02735 ANIA_03096 ANIA_03313 ANIA_05789 ANIA_05871 ANIA_05998 ANIA_06072 ANIA_06162 ANIA_07146 ANIA_08066 ANIA_08073 ANIA_08799 ANIA_09406 ANIA_10526 ANIA_10583
0.000539791	73	518	1.60224	Cellular component assembly	http://amigo.geneontology.org/amigo/term/GO:0022607	ANIA_00228 ANIA_00262 ANIA_00316 ANIA_00359 ANIA_00421 ANIA_00728 ANIA_00843 ANIA_00906 ANIA_01013 ANIA_01166 ANIA_02128 ANIA_02283 ANIA_02491 ANIA_02734 ANIA_02743 ANIA_02862 ANIA_02907 ANIA_02997 ANIA_03055 ANIA_03067 ANIA_03172 ANIA_03411 ANIA_03427 ANIA_03706 ANIA_03745 ANIA_04060 ANIA_04232 ANIA_04259 ANIA_04417 ANIA_04475 ANIA_04560 ANIA_04652 ANIA_05007 ANIA_05057 ANIA_05865 ANIA_05954 ANI…
0.000565932	5	6	9.36468	Assembly of large subunit precursor of preribosome	http://amigo.geneontology.org/amigo/term/GO:1902626	ANIA_04560 ANIA_05865 ANIA_08073 ANIA_08491 ANIA_08704
0.00059421	6	9	7.49174	Endonucleolytic cleavage to generate mature 5 -end of SSU-rRNA from (SSU-rRNA, 5.8S rRNA, LSU-rRNA)	http://amigo.geneontology.org/amigo/term/GO:0000472	ANIA_00421 ANIA_03167 ANIA_04460 ANIA_06334 ANIA_07305 ANIA_10618
0.000726402	38	218	1.95885	Mitotic cell cycle	http://amigo.geneontology.org/amigo/term/GO:0000278	ANIA_00118 ANIA_00228 ANIA_00316 ANIA_00808 ANIA_00905 ANIA_01182 ANIA_01560 ANIA_02054 ANIA_02128 ANIA_02137 ANIA_02160 ANIA_02491 ANIA_02511 ANIA_02927 ANIA_02969 ANIA_03067 ANIA_03795 ANIA_03941 ANIA_03946 ANIA_04513 ANIA_04571 ANIA_05057 ANIA_05406 ANIA_05676 ANIA_05717 ANIA_05815 ANIA_06070 ANIA_06340 ANIA_06838 ANIA_06865 ANIA_06896 ANIA_07296 ANIA_10137 ANIA_10433 ANIA_10497 ANIA_10635 ANI…
0.000781846	21	92	2.56511	Microtubule-based process	http://amigo.geneontology.org/amigo/term/GO:0007017	ANIA_00118 ANIA_00316 ANIA_00414 ANIA_01182 ANIA_01560 ANIA_01953 ANIA_02128 ANIA_02862 ANIA_03124 ANIA_03721 ANIA_04417 ANIA_04513 ANIA_04664 ANIA_04706 ANIA_05057 ANIA_05815 ANIA_06340 ANIA_06838 ANIA_06863 ANIA_06865 ANIA_10137
0.000797694	8	17	5.28829	RRNA methylation	http://amigo.geneontology.org/amigo/term/GO:0031167	ANIA_00092 ANIA_00625 ANIA_00745 ANIA_01957 ANIA_03313 ANIA_05789 ANIA_05871 ANIA_08073
0.000797694	8	17	5.28829	RNA polymerase III complex	http://amigo.geneontology.org/amigo/term/GO:0005666	ANIA_02135 ANIA_02415 ANIA_02747 ANIA_03166 ANIA_06558 ANIA_07608 ANIA_08272 ANIA_09125
0.000898457	127	1046	1.3883	Nucleotide binding	http://amigo.geneontology.org/amigo/term/GO:0000166	ANIA_00044 ANIA_00118 ANIA_00126 ANIA_00133 ANIA_00174 ANIA_00204 ANIA_00228 ANIA_00247 ANIA_00316 ANIA_00381 ANIA_00404 ANIA_00490 ANIA_00565 ANIA_00583 ANIA_00589 ANIA_00637 ANIA_00804 ANIA_00818 ANIA_00822 ANIA_00944 ANIA_00956 ANIA_01084 ANIA_01182 ANIA_01215 ANIA_01256 ANIA_01366 ANIA_01394 ANIA_01408 ANIA_01560 ANIA_01628 ANIA_01666 ANIA_01708 ANIA_01710 ANIA_01750 ANIA_01851 ANIA_01949 ANI…
0.000898457	21	100	2.53753	Endonuclease activity	http://amigo.geneontology.org/amigo/term/GO:0004519	ANIA_00189 ANIA_00190 ANIA_00242 ANIA_00997 ANIA_01474 ANIA_01723 ANIA_02185 ANIA_02457 ANIA_02847 ANIA_03035 ANIA_03652 ANIA_03947 ANIA_04067 ANIA_04087 ANIA_04631 ANIA_05040 ANIA_05114 ANIA_05408 ANIA_06682 ANIA_06822 ANIA_08253
0.000898457	127	1046	1.3883	Nucleoside phosphate binding	http://amigo.geneontology.org/amigo/term/GO:1901265	ANIA_00044 ANIA_00118 ANIA_00126 ANIA_00133 ANIA_00174 ANIA_00204 ANIA_00228 ANIA_00247 ANIA_00316 ANIA_00381 ANIA_00404 ANIA_00490 ANIA_00565 ANIA_00583 ANIA_00589 ANIA_00637 ANIA_00804 ANIA_00818 ANIA_00822 ANIA_00944 ANIA_00956 ANIA_01084 ANIA_01182 ANIA_01215 ANIA_01256 ANIA_01366 ANIA_01394 ANIA_01408 ANIA_01560 ANIA_01628 ANIA_01666 ANIA_01708 ANIA_01710 ANIA_01750 ANIA_01851 ANIA_01949 ANI…
0.000968549	19	81	2.66893	Regulation of translation	http://amigo.geneontology.org/amigo/term/GO:0006417	ANIA_00974 ANIA_01256 ANIA_03055 ANIA_03411 ANIA_03413 ANIA_04000 ANIA_04163 ANIA_04202 ANIA_04617 ANIA_04803 ANIA_05111 ANIA_06244 ANIA_06651 ANIA_07554 ANIA_09090 ANIA_09093 ANIA_10173 ANIA_10182 ANIA_10315
0.00106612	14	51	3.21075	Cell cycle	http://www.genome.jp/kegg-bin/show_pathway?ani04111	ANIA_00228 ANIA_00814 ANIA_00905 ANIA_02511 ANIA_02927 ANIA_03941 ANIA_03946 ANIA_04571 ANIA_05057 ANIA_05676 ANIA_05992 ANIA_06070 ANIA_07678 ANIA_07994
0.00106653	18	74	2.73347	RNA polymerase complex	http://amigo.geneontology.org/amigo/term/GO:0030880	ANIA_00260 ANIA_02135 ANIA_02283 ANIA_02415 ANIA_02717 ANIA_02747 ANIA_03033 ANIA_03166 ANIA_03933 ANIA_06558 ANIA_07608 ANIA_07609 ANIA_08272 ANIA_09102 ANIA_09125 ANIA_10755 ANIA_10855 ANIA_10970
0.00106653	4	4	11.2376	Eukaryotic translation initiation factor 3 complex, eIF3e	http://amigo.geneontology.org/amigo/term/GO:0071540	ANIA_02743 ANIA_02907 ANIA_07540 ANIA_10765
0.0012612	8	18	4.99449	DNA replication origin binding	http://amigo.geneontology.org/amigo/term/GO:0003688	ANIA_00228 ANIA_02491 ANIA_05676 ANIA_05992 ANIA_06070 ANIA_07994 ANIA_10497 ANIA_10755
0.00126782	6	10	6.74257	Septin ring	http://amigo.geneontology.org/amigo/term/GO:0005940	ANIA_01394 ANIA_04667 ANIA_04706 ANIA_06150 ANIA_06688 ANIA_08182
0.00138337	30	164	2.08104	Methylation	http://amigo.geneontology.org/amigo/term/GO:0032259	ANIA_00092 ANIA_00141 ANIA_00625 ANIA_00745 ANIA_00757 ANIA_00761 ANIA_01751 ANIA_01905 ANIA_01957 ANIA_02609 ANIA_02735 ANIA_03096 ANIA_03313 ANIA_03537 ANIA_04008 ANIA_05789 ANIA_05871 ANIA_05998 ANIA_06072 ANIA_06162 ANIA_06577 ANIA_06952 ANIA_07146 ANIA_08066 ANIA_08073 ANIA_08799 ANIA_08910 ANIA_09406 ANIA_10526 ANIA_10583
0.00150112	16	66	2.854	Ribonucleoprotein complex localization	http://amigo.geneontology.org/amigo/term/GO:0071166	ANIA_00843 ANIA_00844 ANIA_01256 ANIA_02210 ANIA_02262 ANIA_03172 ANIA_03413 ANIA_03745 ANIA_04087 ANIA_05717 ANIA_05789 ANIA_05865 ANIA_06507 ANIA_06651 ANIA_07143 ANIA_10618
0.00150112	16	66	2.854	Ribonucleoprotein complex export from nucleus	http://amigo.geneontology.org/amigo/term/GO:0071426	ANIA_00843 ANIA_00844 ANIA_01256 ANIA_02210 ANIA_02262 ANIA_03172 ANIA_03413 ANIA_03745 ANIA_04087 ANIA_05717 ANIA_05789 ANIA_05865 ANIA_06507 ANIA_06651 ANIA_07143 ANIA_10618
0.00164403	5	7	8.02687	Single-stranded DNA helicase activity	http://amigo.geneontology.org/amigo/term/GO:0017116	ANIA_00228 ANIA_02491 ANIA_05992 ANIA_06070 ANIA_07994
0.0017737	18	79	2.62697	DNA-dependent DNA replication	http://amigo.geneontology.org/amigo/term/GO:0006261	ANIA_00228 ANIA_00260 ANIA_02491 ANIA_02969 ANIA_03033 ANIA_03067 ANIA_04771 ANIA_05676 ANIA_05992 ANIA_06070 ANIA_06300 ANIA_06896 ANIA_07994 ANIA_10470 ANIA_10497 ANIA_10635 ANIA_10755 ANIA_10855
0.00191799	8	20	4.73163	DNA strand elongation	http://amigo.geneontology.org/amigo/term/GO:0022616	ANIA_02491 ANIA_02969 ANIA_03067 ANIA_05992 ANIA_06070 ANIA_10470 ANIA_10497 ANIA_10755
0.00191799	8	20	4.73163	DNA strand elongation involved in DNA replication	http://amigo.geneontology.org/amigo/term/GO:0006271	ANIA_02491 ANIA_02969 ANIA_03067 ANIA_05992 ANIA_06070 ANIA_10470 ANIA_10497 ANIA_10755
0.00196256	17	71	2.6907	DNA-directed RNA polymerase complex	http://amigo.geneontology.org/amigo/term/GO:0000428	ANIA_00260 ANIA_02135 ANIA_02283 ANIA_02415 ANIA_02747 ANIA_03033 ANIA_03166 ANIA_03933 ANIA_06558 ANIA_07608 ANIA_07609 ANIA_08272 ANIA_09102 ANIA_09125 ANIA_10755 ANIA_10855 ANIA_10970
0.00211745	25	137	2.19485	Nuclease activity	http://amigo.geneontology.org/amigo/term/GO:0004518	ANIA_00189 ANIA_00190 ANIA_00242 ANIA_00997 ANIA_01474 ANIA_01723 ANIA_02185 ANIA_02457 ANIA_02847 ANIA_03035 ANIA_03067 ANIA_03652 ANIA_03947 ANIA_04067 ANIA_04087 ANIA_04617 ANIA_04631 ANIA_05040 ANIA_05114 ANIA_05408 ANIA_06682 ANIA_06822 ANIA_08253 ANIA_10755 ANIA_10955
0.00213459	21	101	2.38374	TRNA processing	http://amigo.geneontology.org/amigo/term/GO:0008033	ANIA_00141 ANIA_00189 ANIA_00190 ANIA_00247 ANIA_00745 ANIA_00757 ANIA_00804 ANIA_00818 ANIA_00956 ANIA_01751 ANIA_02451 ANIA_02735 ANIA_03652 ANIA_04067 ANIA_04631 ANIA_06577 ANIA_08066 ANIA_08214 ANIA_08799 ANIA_09406 ANIA_10551
0.0023153	7	15	5.24422	RRNA methyltransferase activity	http://amigo.geneontology.org/amigo/term/GO:0008649	ANIA_00092 ANIA_00745 ANIA_01957 ANIA_03313 ANIA_05789 ANIA_05871 ANIA_08073
0.0023153	7	15	5.24422	Catalytic activity, acting on a rRNA	http://amigo.geneontology.org/amigo/term/GO:0140102	ANIA_00092 ANIA_00745 ANIA_01957 ANIA_03313 ANIA_05789 ANIA_05871 ANIA_08073
0.00239495	6	11	6.12961	Septin cytoskeleton	http://amigo.geneontology.org/amigo/term/GO:0032156	ANIA_01394 ANIA_04667 ANIA_04706 ANIA_06150 ANIA_06688 ANIA_08182
0.00245795	20	95	2.41669	DNA replication	http://amigo.geneontology.org/amigo/term/GO:0006260	ANIA_00228 ANIA_00260 ANIA_02160 ANIA_02491 ANIA_02969 ANIA_03033 ANIA_03067 ANIA_04771 ANIA_05676 ANIA_05992 ANIA_06070 ANIA_06300 ANIA_06896 ANIA_07007 ANIA_07994 ANIA_10470 ANIA_10497 ANIA_10635 ANIA_10755 ANIA_10855
0.00258127	32	184	1.95437	Mitotic cell cycle process	http://amigo.geneontology.org/amigo/term/GO:1903047	ANIA_00228 ANIA_00808 ANIA_00905 ANIA_01182 ANIA_01560 ANIA_02128 ANIA_02137 ANIA_02160 ANIA_02491 ANIA_02511 ANIA_02927 ANIA_02969 ANIA_03067 ANIA_03795 ANIA_03941 ANIA_03946 ANIA_04513 ANIA_04571 ANIA_05057 ANIA_05406 ANIA_05676 ANIA_05717 ANIA_05815 ANIA_06070 ANIA_06340 ANIA_06865 ANIA_06896 ANIA_07296 ANIA_10137 ANIA_10433 ANIA_10497 ANIA_10755
0.00299866	11	36	3.43371	Movement of cell or subcellular component	http://amigo.geneontology.org/amigo/term/GO:0006928	ANIA_00118 ANIA_00316 ANIA_01182 ANIA_01953 ANIA_03124 ANIA_03721 ANIA_04513 ANIA_04664 ANIA_04706 ANIA_06340 ANIA_06863
0.00299866	11	36	3.43371	Microtubule-based movement	http://amigo.geneontology.org/amigo/term/GO:0007018	ANIA_00118 ANIA_00316 ANIA_01182 ANIA_01953 ANIA_03124 ANIA_03721 ANIA_04513 ANIA_04664 ANIA_04706 ANIA_06340 ANIA_06863
0.00305108	76	579	1.49572	ATP binding	http://amigo.geneontology.org/amigo/term/GO:0005524	ANIA_00044 ANIA_00118 ANIA_00126 ANIA_00133 ANIA_00204 ANIA_00228 ANIA_00247 ANIA_00381 ANIA_00404 ANIA_00490 ANIA_00565 ANIA_00583 ANIA_00589 ANIA_00637 ANIA_00822 ANIA_00944 ANIA_01256 ANIA_01366 ANIA_01560 ANIA_01628 ANIA_01708 ANIA_01710 ANIA_01750 ANIA_01851 ANIA_01949 ANIA_01956 ANIA_02210 ANIA_02436 ANIA_02491 ANIA_02549 ANIA_02646 ANIA_02927 ANIA_02932 ANIA_02969 ANIA_03070 ANIA_03124 ANI…
0.00333844	15	61	2.76335	TRNA modification	http://amigo.geneontology.org/amigo/term/GO:0006400	ANIA_00141 ANIA_00247 ANIA_00757 ANIA_00804 ANIA_00818 ANIA_00956 ANIA_01751 ANIA_02451 ANIA_02735 ANIA_06577 ANIA_08066 ANIA_08214 ANIA_08799 ANIA_09406 ANIA_10551
0.00344545	137	1183	1.32492	Small molecule binding	http://amigo.geneontology.org/amigo/term/GO:0036094	ANIA_00044 ANIA_00118 ANIA_00126 ANIA_00133 ANIA_00150 ANIA_00174 ANIA_00204 ANIA_00228 ANIA_00247 ANIA_00316 ANIA_00381 ANIA_00404 ANIA_00490 ANIA_00565 ANIA_00583 ANIA_00589 ANIA_00637 ANIA_00744 ANIA_00804 ANIA_00818 ANIA_00822 ANIA_00944 ANIA_00956 ANIA_01084 ANIA_01182 ANIA_01215 ANIA_01256 ANIA_01366 ANIA_01394 ANIA_01408 ANIA_01560 ANIA_01628 ANIA_01666 ANIA_01708 ANIA_01710 ANIA_01750 ANI…
0.00362237	5	9	7.02351	Ribosomal small subunit export from nucleus	http://amigo.geneontology.org/amigo/term/GO:0000056	ANIA_02210 ANIA_02262 ANIA_04087 ANIA_05789 ANIA_10618
0.00362237	5	8	7.02351	Cell cycle DNA replication initiation	http://amigo.geneontology.org/amigo/term/GO:1902292	ANIA_02491 ANIA_03067 ANIA_06070 ANIA_10497 ANIA_10755
0.00362237	5	8	7.02351	Nuclear cell cycle DNA replication initiation	http://amigo.geneontology.org/amigo/term/GO:1902315	ANIA_02491 ANIA_03067 ANIA_06070 ANIA_10497 ANIA_10755
0.00362237	5	8	7.02351	Mitotic DNA replication initiation	http://amigo.geneontology.org/amigo/term/GO:1902975	ANIA_02491 ANIA_03067 ANIA_06070 ANIA_10497 ANIA_10755
0.00362237	5	8	7.02351	Chaperonin-containing T-complex	http://amigo.geneontology.org/amigo/term/GO:0005832	ANIA_00381 ANIA_01851 ANIA_03070 ANIA_03134 ANIA_05713
0.00396628	8	21	4.281	TRNA methylation	http://amigo.geneontology.org/amigo/term/GO:0030488	ANIA_00141 ANIA_00757 ANIA_01751 ANIA_02735 ANIA_06577 ANIA_08066 ANIA_08799 ANIA_09406
0.00403616	6	12	5.61881	Double-strand break repair via break-induced replication	http://amigo.geneontology.org/amigo/term/GO:0000727	ANIA_00228 ANIA_02491 ANIA_05992 ANIA_06070 ANIA_07994 ANIA_10497
0.00403616	4	5	8.99009	Peptidyl-asparagine modification	http://amigo.geneontology.org/amigo/term/GO:0018196	ANIA_01455 ANIA_04683 ANIA_07426 ANIA_07472
0.00403616	4	5	8.99009	Protein N-linked glycosylation via asparagine	http://amigo.geneontology.org/amigo/term/GO:0018279	ANIA_01455 ANIA_04683 ANIA_07426 ANIA_07472
0.00403616	4	5	8.99009	RRNA transport	http://amigo.geneontology.org/amigo/term/GO:0051029	ANIA_00843 ANIA_03172 ANIA_03413 ANIA_04087
0.00403616	4	5	8.99009	Alpha DNA polymerase:primase complex	http://amigo.geneontology.org/amigo/term/GO:0005658	ANIA_00260 ANIA_03033 ANIA_10755 ANIA_10855
0.00403616	4	5	8.99009	Box C/D RNP complex	http://amigo.geneontology.org/amigo/term/GO:0031428	ANIA_00745 ANIA_01319 ANIA_03167 ANIA_10352
0.00403616	4	5	8.99009	Box H/ACA snoRNP complex	http://amigo.geneontology.org/amigo/term/GO:0031429	ANIA_00695 ANIA_08254 ANIA_08851 ANIA_10712
0.00403616	4	5	8.99009	RRNA export from nucleus	http://amigo.geneontology.org/amigo/term/GO:0006407	ANIA_00843 ANIA_03172 ANIA_03413 ANIA_04087
0.00403616	4	5	8.99009	Box H/ACA RNP complex	http://amigo.geneontology.org/amigo/term/GO:0072588	ANIA_00695 ANIA_08254 ANIA_08851 ANIA_10712
0.00403616	6	13	5.61881	Endoribonuclease complex	http://amigo.geneontology.org/amigo/term/GO:1902555	ANIA_00189 ANIA_00190 ANIA_03652 ANIA_04067 ANIA_04631 ANIA_06822
0.00413565	22	114	2.20739	GTP binding	http://amigo.geneontology.org/amigo/term/GO:0005525	ANIA_00316 ANIA_00804 ANIA_01084 ANIA_01182 ANIA_01215 ANIA_01394 ANIA_01408 ANIA_01666 ANIA_03419 ANIA_03832 ANIA_04667 ANIA_04685 ANIA_04708 ANIA_05020 ANIA_05865 ANIA_06150 ANIA_06266 ANIA_06334 ANIA_06688 ANIA_06838 ANIA_08182 ANIA_10315
0.00413565	22	114	2.20739	Guanyl nucleotide binding	http://amigo.geneontology.org/amigo/term/GO:0019001	ANIA_00316 ANIA_00804 ANIA_01084 ANIA_01182 ANIA_01215 ANIA_01394 ANIA_01408 ANIA_01666 ANIA_03419 ANIA_03832 ANIA_04667 ANIA_04685 ANIA_04708 ANIA_05020 ANIA_05865 ANIA_06150 ANIA_06266 ANIA_06334 ANIA_06688 ANIA_06838 ANIA_08182 ANIA_10315
0.00413565	22	114	2.20739	Guanyl ribonucleotide binding	http://amigo.geneontology.org/amigo/term/GO:0032561	ANIA_00316 ANIA_00804 ANIA_01084 ANIA_01182 ANIA_01215 ANIA_01394 ANIA_01408 ANIA_01666 ANIA_03419 ANIA_03832 ANIA_04667 ANIA_04685 ANIA_04708 ANIA_05020 ANIA_05865 ANIA_06150 ANIA_06266 ANIA_06334 ANIA_06688 ANIA_06838 ANIA_08182 ANIA_10315
0.00462514	16	70	2.5686	Nuclear DNA-directed RNA polymerase complex	http://amigo.geneontology.org/amigo/term/GO:0055029	ANIA_00260 ANIA_02135 ANIA_02283 ANIA_02415 ANIA_02747 ANIA_03033 ANIA_03166 ANIA_03933 ANIA_06558 ANIA_07608 ANIA_08272 ANIA_09102 ANIA_09125 ANIA_10755 ANIA_10855 ANIA_10970
0.00491036	9	28	3.74587	Transcription by RNA polymerase I	http://amigo.geneontology.org/amigo/term/GO:0006360	ANIA_00312 ANIA_02283 ANIA_02415 ANIA_03933 ANIA_04600 ANIA_04648 ANIA_05455 ANIA_09102 ANIA_10970
0.00494463	23	121	2.13608	Transferase complex, transferring phosphorus-containing groups	http://amigo.geneontology.org/amigo/term/GO:0061695	ANIA_00260 ANIA_02135 ANIA_02137 ANIA_02283 ANIA_02415 ANIA_02717 ANIA_02747 ANIA_03033 ANIA_03067 ANIA_03166 ANIA_03795 ANIA_03933 ANIA_06558 ANIA_06822 ANIA_07608 ANIA_07609 ANIA_08272 ANIA_09102 ANIA_09125 ANIA_10470 ANIA_10755 ANIA_10855 ANIA_10970
0.00509575	7	17	4.62725	TRNA methyltransferase activity	http://amigo.geneontology.org/amigo/term/GO:0008175	ANIA_00141 ANIA_00757 ANIA_01751 ANIA_02735 ANIA_08066 ANIA_08799 ANIA_09406
0.00517559	15	71	2.63382	Ribonuclease activity	http://amigo.geneontology.org/amigo/term/GO:0004540	ANIA_00189 ANIA_00190 ANIA_00997 ANIA_01474 ANIA_01723 ANIA_02185 ANIA_02457 ANIA_02847 ANIA_03652 ANIA_04067 ANIA_04631 ANIA_05040 ANIA_05114 ANIA_05408 ANIA_08253
0.00519858	13	51	2.86449	Spindle	http://amigo.geneontology.org/amigo/term/GO:0005819	ANIA_00316 ANIA_01182 ANIA_01560 ANIA_02128 ANIA_02862 ANIA_02927 ANIA_04513 ANIA_05057 ANIA_05815 ANIA_06340 ANIA_06865 ANIA_08783 ANIA_10137
0.00519858	22	119	2.16866	ATP hydrolysis activity	http://amigo.geneontology.org/amigo/term/GO:0016887	ANIA_00118 ANIA_00126 ANIA_00404 ANIA_01256 ANIA_01366 ANIA_01624 ANIA_01628 ANIA_02210 ANIA_03124 ANIA_03721 ANIA_04513 ANIA_04616 ANIA_05992 ANIA_06070 ANIA_06310 ANIA_06340 ANIA_06651 ANIA_06700 ANIA_06863 ANIA_07464 ANIA_08957 ANIA_10078
0.00526265	33	204	1.84498	Cytoskeleton	http://amigo.geneontology.org/amigo/term/GO:0005856	ANIA_00118 ANIA_00316 ANIA_01099 ANIA_01156 ANIA_01182 ANIA_01394 ANIA_01560 ANIA_01953 ANIA_02128 ANIA_02862 ANIA_02927 ANIA_03124 ANIA_03721 ANIA_04417 ANIA_04513 ANIA_04664 ANIA_04667 ANIA_04706 ANIA_05007 ANIA_05057 ANIA_05815 ANIA_06150 ANIA_06340 ANIA_06688 ANIA_06838 ANIA_06863 ANIA_06865 ANIA_07678 ANIA_08182 ANIA_08783 ANIA_08851 ANIA_10137 ANIA_11166
0.00528483	16	74	2.53242	Protein-containing complex localization	http://amigo.geneontology.org/amigo/term/GO:0031503	ANIA_00843 ANIA_00844 ANIA_01256 ANIA_02210 ANIA_02262 ANIA_03172 ANIA_03413 ANIA_03745 ANIA_04087 ANIA_05717 ANIA_05789 ANIA_05865 ANIA_06507 ANIA_06651 ANIA_07143 ANIA_10618
0.0061412	76	595	1.45495	Adenyl ribonucleotide binding	http://amigo.geneontology.org/amigo/term/GO:0032559	ANIA_00044 ANIA_00118 ANIA_00126 ANIA_00133 ANIA_00204 ANIA_00228 ANIA_00247 ANIA_00381 ANIA_00404 ANIA_00490 ANIA_00565 ANIA_00583 ANIA_00589 ANIA_00637 ANIA_00822 ANIA_00944 ANIA_01256 ANIA_01366 ANIA_01560 ANIA_01628 ANIA_01708 ANIA_01710 ANIA_01750 ANIA_01851 ANIA_01949 ANIA_01956 ANIA_02210 ANIA_02436 ANIA_02491 ANIA_02549 ANIA_02646 ANIA_02927 ANIA_02932 ANIA_02969 ANIA_03070 ANIA_03124 ANI…
0.00664628	29	173	1.90579	Methyltransferase activity	http://amigo.geneontology.org/amigo/term/GO:0008168	ANIA_00092 ANIA_00141 ANIA_00625 ANIA_00745 ANIA_00757 ANIA_00761 ANIA_01751 ANIA_01957 ANIA_02609 ANIA_02735 ANIA_03096 ANIA_03313 ANIA_03537 ANIA_04008 ANIA_05789 ANIA_05871 ANIA_05998 ANIA_06072 ANIA_06162 ANIA_06952 ANIA_07146 ANIA_07933 ANIA_08066 ANIA_08073 ANIA_08799 ANIA_08910 ANIA_09406 ANIA_10526 ANIA_10583
0.00673857	76	597	1.45001	Adenyl nucleotide binding	http://amigo.geneontology.org/amigo/term/GO:0030554	ANIA_00044 ANIA_00118 ANIA_00126 ANIA_00133 ANIA_00204 ANIA_00228 ANIA_00247 ANIA_00381 ANIA_00404 ANIA_00490 ANIA_00565 ANIA_00583 ANIA_00589 ANIA_00637 ANIA_00822 ANIA_00944 ANIA_01256 ANIA_01366 ANIA_01560 ANIA_01628 ANIA_01708 ANIA_01710 ANIA_01750 ANIA_01851 ANIA_01949 ANIA_01956 ANIA_02210 ANIA_02436 ANIA_02491 ANIA_02549 ANIA_02646 ANIA_02927 ANIA_02932 ANIA_02969 ANIA_03070 ANIA_03124 ANI…
0.00688099	131	1139	1.30856	Cellular component organization	http://amigo.geneontology.org/amigo/term/GO:0016043	ANIA_00118 ANIA_00133 ANIA_00228 ANIA_00262 ANIA_00316 ANIA_00359 ANIA_00414 ANIA_00421 ANIA_00728 ANIA_00808 ANIA_00843 ANIA_00844 ANIA_00905 ANIA_00906 ANIA_01013 ANIA_01099 ANIA_01166 ANIA_01182 ANIA_01256 ANIA_01560 ANIA_01579 ANIA_01660 ANIA_01708 ANIA_02068 ANIA_02128 ANIA_02160 ANIA_02185 ANIA_02222 ANIA_02283 ANIA_02491 ANIA_02511 ANIA_02717 ANIA_02734 ANIA_02743 ANIA_02862 ANIA_02907 ANI…
0.00688099	10	34	3.30518	Replication fork	http://amigo.geneontology.org/amigo/term/GO:0005657	ANIA_00260 ANIA_02491 ANIA_02969 ANIA_03033 ANIA_06070 ANIA_06300 ANIA_10470 ANIA_10635 ANIA_10755 ANIA_10855
0.00688099	10	34	3.30518	Spindle organization	http://amigo.geneontology.org/amigo/term/GO:0007051	ANIA_00414 ANIA_01182 ANIA_01560 ANIA_02128 ANIA_02862 ANIA_05057 ANIA_05815 ANIA_06340 ANIA_06865 ANIA_10137
0.00705789	16	76	2.46304	Establishment of organelle localization	http://amigo.geneontology.org/amigo/term/GO:0051656	ANIA_00118 ANIA_00316 ANIA_00844 ANIA_01182 ANIA_01256 ANIA_01953 ANIA_02210 ANIA_02262 ANIA_03745 ANIA_04087 ANIA_04664 ANIA_05789 ANIA_05865 ANIA_06865 ANIA_07143 ANIA_10618
0.00705789	16	75	2.46304	RNA localization	http://amigo.geneontology.org/amigo/term/GO:0006403	ANIA_00753 ANIA_00843 ANIA_03172 ANIA_03413 ANIA_04000 ANIA_04087 ANIA_04317 ANIA_04417 ANIA_04617 ANIA_05717 ANIA_06507 ANIA_06556 ANIA_06651 ANIA_06738 ANIA_08254 ANIA_10112
0.00705789	30	182	1.87294	Transferase activity, transferring one-carbon groups	http://amigo.geneontology.org/amigo/term/GO:0016741	ANIA_00092 ANIA_00141 ANIA_00565 ANIA_00625 ANIA_00745 ANIA_00757 ANIA_00761 ANIA_01751 ANIA_01957 ANIA_02609 ANIA_02735 ANIA_03096 ANIA_03313 ANIA_03537 ANIA_04008 ANIA_05789 ANIA_05871 ANIA_05998 ANIA_06072 ANIA_06162 ANIA_06952 ANIA_07146 ANIA_07933 ANIA_08066 ANIA_08073 ANIA_08799 ANIA_08910 ANIA_09406 ANIA_10526 ANIA_10583
0.00780147	25	146	1.99248	Catalytic activity, acting on DNA	http://amigo.geneontology.org/amigo/term/GO:0140097	ANIA_00228 ANIA_00260 ANIA_01708 ANIA_02160 ANIA_02185 ANIA_02491 ANIA_02969 ANIA_03035 ANIA_03067 ANIA_03749 ANIA_03944 ANIA_03947 ANIA_03958 ANIA_04087 ANIA_04555 ANIA_05406 ANIA_05992 ANIA_06070 ANIA_06300 ANIA_06682 ANIA_07994 ANIA_10470 ANIA_10497 ANIA_10755 ANIA_10855
0.00786306	18	89	2.2986	GTPase activity	http://amigo.geneontology.org/amigo/term/GO:0003924	ANIA_00316 ANIA_01084 ANIA_01182 ANIA_01215 ANIA_01394 ANIA_01408 ANIA_01666 ANIA_03832 ANIA_04667 ANIA_04685 ANIA_04708 ANIA_05020 ANIA_06266 ANIA_06334 ANIA_06688 ANIA_06838 ANIA_08182 ANIA_10315
0.00816822	16	74	2.42975	Microtubule cytoskeleton organization	http://amigo.geneontology.org/amigo/term/GO:0000226	ANIA_00118 ANIA_00316 ANIA_00414 ANIA_01182 ANIA_01560 ANIA_02128 ANIA_02862 ANIA_04417 ANIA_04513 ANIA_04664 ANIA_05057 ANIA_05815 ANIA_06340 ANIA_06838 ANIA_06865 ANIA_10137
0.00833077	3	3	11.2376	SnRNA pseudouridine synthesis	http://amigo.geneontology.org/amigo/term/GO:0031120	ANIA_00695 ANIA_08254 ANIA_08851
0.00833077	3	3	11.2376	SnRNA modification	http://amigo.geneontology.org/amigo/term/GO:0040031	ANIA_00695 ANIA_08254 ANIA_08851
0.00833077	3	3	11.2376	Acetaldehyde catabolic process	http://amigo.geneontology.org/amigo/term/GO:0046187	ANIA_00554 ANIA_08978 ANIA_08979
0.00833077	3	3	11.2376	Acetaldehyde metabolic process	http://amigo.geneontology.org/amigo/term/GO:0006117	ANIA_00554 ANIA_08978 ANIA_08979
0.00833077	3	3	11.2376	DNA replication, synthesis of RNA primer	http://amigo.geneontology.org/amigo/term/GO:0006269	ANIA_00260 ANIA_03033 ANIA_10755
0.00833077	3	3	11.2376	Noc complex	http://amigo.geneontology.org/amigo/term/GO:0030689	ANIA_00946 ANIA_01434 ANIA_01533
0.00833077	3	3	11.2376	Hyphal septin ring	http://amigo.geneontology.org/amigo/term/GO:0032168	ANIA_04706 ANIA_06150 ANIA_06688
0.00833077	3	3	11.2376	PeBoW complex	http://amigo.geneontology.org/amigo/term/GO:0070545	ANIA_01367 ANIA_03827 ANIA_04469
0.00833077	3	3	11.2376	MCM core complex	http://amigo.geneontology.org/amigo/term/GO:0097373	ANIA_00228 ANIA_05992 ANIA_06070
0.00833077	3	3	11.2376	RRNA (guanine) methyltransferase activity	http://amigo.geneontology.org/amigo/term/GO:0016435	ANIA_00092 ANIA_01957 ANIA_05789
0.00833077	3	3	11.2376	3 -5 DNA/RNA helicase activity	http://amigo.geneontology.org/amigo/term/GO:0033679	ANIA_00228 ANIA_05992 ANIA_06070
0.00833077	3	3	11.2376	Single-stranded 3 -5 DNA helicase activity	http://amigo.geneontology.org/amigo/term/GO:1990518	ANIA_00228 ANIA_05992 ANIA_06070
0.00889144	8	24	3.74587	Nuclear DNA replication	http://amigo.geneontology.org/amigo/term/GO:0033260	ANIA_00228 ANIA_02491 ANIA_03067 ANIA_05992 ANIA_06070 ANIA_07994 ANIA_10497 ANIA_10755
0.00889144	8	24	3.74587	Cell cycle DNA replication	http://amigo.geneontology.org/amigo/term/GO:0044786	ANIA_00228 ANIA_02491 ANIA_03067 ANIA_05992 ANIA_06070 ANIA_07994 ANIA_10497 ANIA_10755
0.00889144	8	24	3.74587	Nuclear replication fork	http://amigo.geneontology.org/amigo/term/GO:0043596	ANIA_00260 ANIA_02491 ANIA_03033 ANIA_06070 ANIA_10470 ANIA_10635 ANIA_10755 ANIA_10855
0.00889144	8	25	3.74587	Microtubule motor activity	http://amigo.geneontology.org/amigo/term/GO:0003777	ANIA_00118 ANIA_03124 ANIA_03721 ANIA_04513 ANIA_04664 ANIA_04706 ANIA_06340 ANIA_06863
0.00889144	8	26	3.74587	O-methyltransferase activity	http://amigo.geneontology.org/amigo/term/GO:0008171	ANIA_00092 ANIA_00761 ANIA_01957 ANIA_02609 ANIA_03537 ANIA_04008 ANIA_06162 ANIA_06952
0.00889144	8	24	3.74587	Regulation of mitotic nuclear division	http://amigo.geneontology.org/amigo/term/GO:0007088	ANIA_00808 ANIA_00905 ANIA_02511 ANIA_02927 ANIA_03941 ANIA_03946 ANIA_05717 ANIA_10433
0.00906749	19	98	2.20118	Regulation of cellular amide metabolic process	http://amigo.geneontology.org/amigo/term/GO:0034248	ANIA_00974 ANIA_01256 ANIA_03055 ANIA_03411 ANIA_03413 ANIA_04000 ANIA_04163 ANIA_04202 ANIA_04617 ANIA_04803 ANIA_05111 ANIA_06244 ANIA_06651 ANIA_07554 ANIA_09090 ANIA_09093 ANIA_10173 ANIA_10182 ANIA_10315
0.00919045	4	6	7.49174	Oligosaccharyltransferase complex	http://amigo.geneontology.org/amigo/term/GO:0008250	ANIA_01455 ANIA_04683 ANIA_07426 ANIA_07472
0.00919045	4	6	7.49174	Septin complex	http://amigo.geneontology.org/amigo/term/GO:0031105	ANIA_01394 ANIA_04667 ANIA_06688 ANIA_08182
0.00919045	4	6	7.49174	Small ribosomal subunit rRNA binding	http://amigo.geneontology.org/amigo/term/GO:0070181	ANIA_03413 ANIA_05960 ANIA_06679 ANIA_10052
0.00979029	9	30	3.37128	Transcription by RNA polymerase III	http://amigo.geneontology.org/amigo/term/GO:0006383	ANIA_02135 ANIA_02415 ANIA_02747 ANIA_03166 ANIA_06558 ANIA_07608 ANIA_07997 ANIA_08272 ANIA_09125
0.0101636	95	792	1.36344	Organelle organization	http://amigo.geneontology.org/amigo/term/GO:0006996	ANIA_00118 ANIA_00228 ANIA_00262 ANIA_00316 ANIA_00414 ANIA_00421 ANIA_00808 ANIA_00843 ANIA_00844 ANIA_00905 ANIA_00906 ANIA_01013 ANIA_01099 ANIA_01166 ANIA_01182 ANIA_01256 ANIA_01560 ANIA_01660 ANIA_01708 ANIA_02068 ANIA_02128 ANIA_02160 ANIA_02491 ANIA_02511 ANIA_02717 ANIA_02734 ANIA_02862 ANIA_02927 ANIA_03067 ANIA_03080 ANIA_03172 ANIA_03706 ANIA_03745 ANIA_03749 ANIA_03941 ANIA_03946 ANI…
0.0106106	5	10	5.61881	Cytoplasmic microtubule	http://amigo.geneontology.org/amigo/term/GO:0005881	ANIA_00118 ANIA_00316 ANIA_01182 ANIA_02862 ANIA_04513
0.0106106	5	10	5.61881	Chaperone complex	http://amigo.geneontology.org/amigo/term/GO:0101031	ANIA_00381 ANIA_01851 ANIA_03070 ANIA_03134 ANIA_05713
0.0106106	5	11	5.61881	TRNA-specific ribonuclease activity	http://amigo.geneontology.org/amigo/term/GO:0004549	ANIA_00189 ANIA_00190 ANIA_03652 ANIA_04067 ANIA_04631
0.0106407	12	51	2.75207	Single-stranded DNA binding	http://amigo.geneontology.org/amigo/term/GO:0003697	ANIA_00126 ANIA_00228 ANIA_00260 ANIA_02491 ANIA_02847 ANIA_03033 ANIA_05992 ANIA_06070 ANIA_07994 ANIA_08272 ANIA_10497 ANIA_10755
0.0113945	121	1061	1.30369	Anion binding	http://amigo.geneontology.org/amigo/term/GO:0043168	ANIA_00044 ANIA_00118 ANIA_00126 ANIA_00133 ANIA_00174 ANIA_00204 ANIA_00228 ANIA_00247 ANIA_00316 ANIA_00381 ANIA_00404 ANIA_00490 ANIA_00565 ANIA_00583 ANIA_00589 ANIA_00637 ANIA_00744 ANIA_00804 ANIA_00818 ANIA_00822 ANIA_00944 ANIA_00956 ANIA_01084 ANIA_01182 ANIA_01215 ANIA_01256 ANIA_01366 ANIA_01394 ANIA_01408 ANIA_01560 ANIA_01628 ANIA_01666 ANIA_01708 ANIA_01710 ANIA_01750 ANIA_01851 ANI…
0.0114007	16	77	2.33509	Mitotic cell cycle phase transition	http://amigo.geneontology.org/amigo/term/GO:0044772	ANIA_00808 ANIA_00905 ANIA_01560 ANIA_02137 ANIA_02511 ANIA_02927 ANIA_02969 ANIA_03795 ANIA_03941 ANIA_03946 ANIA_04571 ANIA_05057 ANIA_05676 ANIA_05717 ANIA_06896 ANIA_10433
0.0114644	8	25	3.59604	COPII-coated ER to Golgi transport vesicle	http://amigo.geneontology.org/amigo/term/GO:0030134	ANIA_02738 ANIA_03080 ANIA_04317 ANIA_06257 ANIA_06307 ANIA_07679 ANIA_10313 ANIA_10724
0.0114809	11	46	2.87474	Meiosis	http://www.genome.jp/kegg-bin/show_pathway?ani04113	ANIA_00228 ANIA_00814 ANIA_00905 ANIA_02511 ANIA_03946 ANIA_05057 ANIA_05676 ANIA_05992 ANIA_06015 ANIA_06070 ANIA_07994
0.0129097	7	20	3.93316	Positive regulation of translation	http://amigo.geneontology.org/amigo/term/GO:0045727	ANIA_01256 ANIA_03413 ANIA_04000 ANIA_04803 ANIA_05111 ANIA_09093 ANIA_10315
0.0129097	7	20	3.93316	Nuclear periphery	http://amigo.geneontology.org/amigo/term/GO:0034399	ANIA_00074 ANIA_00905 ANIA_00906 ANIA_02120 ANIA_02431 ANIA_04595 ANIA_05717
0.013047	6	16	4.49505	Ethanol metabolic process	http://amigo.geneontology.org/amigo/term/GO:0006067	ANIA_00554 ANIA_05226 ANIA_08978 ANIA_08979 ANIA_08980 ANIA_08981
0.013047	6	15	4.49505	DNA polymerase complex	http://amigo.geneontology.org/amigo/term/GO:0042575	ANIA_00260 ANIA_03033 ANIA_03067 ANIA_10470 ANIA_10755 ANIA_10855
0.0150061	21	118	2.01701	Protein-containing complex binding	http://amigo.geneontology.org/amigo/term/GO:0044877	ANIA_00814 ANIA_00906 ANIA_01256 ANIA_01366 ANIA_01367 ANIA_01708 ANIA_03055 ANIA_03096 ANIA_03427 ANIA_03827 ANIA_04163 ANIA_04469 ANIA_04571 ANIA_04706 ANIA_05007 ANIA_05719 ANIA_06651 ANIA_07143 ANIA_07350 ANIA_07721 ANIA_10315
0.0165564	71	569	1.41466	Nuclear protein-containing complex	http://amigo.geneontology.org/amigo/term/GO:0140513	ANIA_00126 ANIA_00133 ANIA_00189 ANIA_00190 ANIA_00260 ANIA_00305 ANIA_00421 ANIA_00695 ANIA_00808 ANIA_00814 ANIA_00905 ANIA_00946 ANIA_01238 ANIA_01319 ANIA_01367 ANIA_01408 ANIA_01434 ANIA_01533 ANIA_01708 ANIA_01929 ANIA_02135 ANIA_02283 ANIA_02415 ANIA_02431 ANIA_02491 ANIA_02511 ANIA_02717 ANIA_02747 ANIA_03033 ANIA_03067 ANIA_03166 ANIA_03749 ANIA_03794 ANIA_03827 ANIA_03933 ANIA_04000 ANI…
0.0171624	5	12	5.10801	SnRNA metabolic process	http://amigo.geneontology.org/amigo/term/GO:0016073	ANIA_00695 ANIA_04617 ANIA_06244 ANIA_08254 ANIA_08851
0.0171624	5	11	5.10801	Aldehyde catabolic process	http://amigo.geneontology.org/amigo/term/GO:0046185	ANIA_00554 ANIA_05534 ANIA_08782 ANIA_08978 ANIA_08979
0.0191662	8	27	3.32966	Cell cycle G2/M phase transition	http://amigo.geneontology.org/amigo/term/GO:0044839	ANIA_00808 ANIA_01560 ANIA_02969 ANIA_03941 ANIA_04571 ANIA_05676 ANIA_05717 ANIA_06896
0.0191662	8	27	3.32966	G2/M transition of mitotic cell cycle	http://amigo.geneontology.org/amigo/term/GO:0000086	ANIA_00808 ANIA_01560 ANIA_02969 ANIA_03941 ANIA_04571 ANIA_05676 ANIA_05717 ANIA_06896
0.0191662	8	28	3.32966	Cytoskeletal motor activity	http://amigo.geneontology.org/amigo/term/GO:0003774	ANIA_00118 ANIA_03124 ANIA_03721 ANIA_04513 ANIA_04664 ANIA_04706 ANIA_06340 ANIA_06863
0.0200005	24	147	1.87294	TRNA metabolic process	http://amigo.geneontology.org/amigo/term/GO:0006399	ANIA_00141 ANIA_00189 ANIA_00190 ANIA_00247 ANIA_00745 ANIA_00757 ANIA_00804 ANIA_00818 ANIA_00956 ANIA_01710 ANIA_01751 ANIA_02451 ANIA_02735 ANIA_03652 ANIA_04067 ANIA_04617 ANIA_04631 ANIA_06244 ANIA_06577 ANIA_08066 ANIA_08214 ANIA_08799 ANIA_09406 ANIA_10551
0.0207251	29	187	1.7521	Regulation of cellular protein metabolic process	http://amigo.geneontology.org/amigo/term/GO:0032268	ANIA_00814 ANIA_00906 ANIA_00974 ANIA_01256 ANIA_02137 ANIA_03055 ANIA_03411 ANIA_03413 ANIA_03795 ANIA_03941 ANIA_04000 ANIA_04163 ANIA_04202 ANIA_04571 ANIA_04617 ANIA_04803 ANIA_05111 ANIA_05717 ANIA_05719 ANIA_06244 ANIA_06651 ANIA_06865 ANIA_07554 ANIA_09090 ANIA_09093 ANIA_10173 ANIA_10182 ANIA_10315 ANIA_11032
0.0215311	16	84	2.1927	Catalytic activity, acting on a tRNA	http://amigo.geneontology.org/amigo/term/GO:0140101	ANIA_00141 ANIA_00189 ANIA_00190 ANIA_00757 ANIA_00818 ANIA_00956 ANIA_01710 ANIA_01751 ANIA_02735 ANIA_03652 ANIA_04067 ANIA_04631 ANIA_08066 ANIA_08214 ANIA_08799 ANIA_09406
0.0231125	7	23	3.5756	Primary alcohol metabolic process	http://amigo.geneontology.org/amigo/term/GO:0034308	ANIA_00554 ANIA_02548 ANIA_05226 ANIA_08978 ANIA_08979 ANIA_08980 ANIA_08981
0.0239318	42	307	1.56285	DNA metabolic process	http://amigo.geneontology.org/amigo/term/GO:0006259	ANIA_00044 ANIA_00126 ANIA_00228 ANIA_00260 ANIA_00683 ANIA_01366 ANIA_01660 ANIA_01708 ANIA_02185 ANIA_02491 ANIA_02969 ANIA_03033 ANIA_03035 ANIA_03048 ANIA_03067 ANIA_03731 ANIA_03749 ANIA_03947 ANIA_03958 ANIA_04087 ANIA_04335 ANIA_04555 ANIA_04771 ANIA_05114 ANIA_05406 ANIA_05676 ANIA_05992 ANIA_06070 ANIA_06300 ANIA_06682 ANIA_06896 ANIA_07007 ANIA_07296 ANIA_07994 ANIA_08186 ANIA_08254 ANI…
0.025673	3	4	8.42821	Primary miRNA processing	http://amigo.geneontology.org/amigo/term/GO:0031053	ANIA_00997 ANIA_05408 ANIA_06507
0.025673	3	4	8.42821	Gene silencing by miRNA	http://amigo.geneontology.org/amigo/term/GO:0035195	ANIA_00997 ANIA_05408 ANIA_06507
0.025673	3	4	8.42821	Production of miRNAs involved in gene silencing by miRNA	http://amigo.geneontology.org/amigo/term/GO:0035196	ANIA_00997 ANIA_05408 ANIA_06507
0.025673	3	4	8.42821	Farnesyl diphosphate metabolic process	http://amigo.geneontology.org/amigo/term/GO:0045338	ANIA_04923 ANIA_08012 ANIA_10396
0.025673	3	4	8.42821	Premeiotic DNA replication	http://amigo.geneontology.org/amigo/term/GO:0006279	ANIA_03067 ANIA_06070 ANIA_10755
0.025673	6	17	3.96622	Cytoplasmic stress granule	http://amigo.geneontology.org/amigo/term/GO:0010494	ANIA_00359 ANIA_02932 ANIA_03411 ANIA_04000 ANIA_07480 ANIA_10164
0.025673	3	4	8.42821	Nuclear pore inner ring	http://amigo.geneontology.org/amigo/term/GO:0044611	ANIA_06738 ANIA_10002 ANIA_10112
0.025673	3	4	8.42821	Tubulin complex	http://amigo.geneontology.org/amigo/term/GO:0045298	ANIA_00316 ANIA_01182 ANIA_06838
0.025673	5	12	4.68234	Spindle midzone	http://amigo.geneontology.org/amigo/term/GO:0051233	ANIA_02128 ANIA_02862 ANIA_04513 ANIA_05057 ANIA_05815
0.025673	3	4	8.42821	RNA polymerase I activity	http://amigo.geneontology.org/amigo/term/GO:0001054	ANIA_02415 ANIA_02747 ANIA_06558
0.025673	3	4	8.42821	Ribosomal protein import into nucleus	http://amigo.geneontology.org/amigo/term/GO:0006610	ANIA_00906 ANIA_02120 ANIA_05717
0.025673	3	4	8.42821	DNA/RNA helicase activity	http://amigo.geneontology.org/amigo/term/GO:0033677	ANIA_00228 ANIA_05992 ANIA_06070
0.025673	3	4	8.42821	Box H/ACA snoRNA binding	http://amigo.geneontology.org/amigo/term/GO:0034513	ANIA_00695 ANIA_08254 ANIA_10712
0.025673	3	4	8.42821	Ribosomal small subunit binding	http://amigo.geneontology.org/amigo/term/GO:0043024	ANIA_01256 ANIA_03427 ANIA_07350
0.025673	6	19	3.96622	Protein folding chaperone	http://amigo.geneontology.org/amigo/term/GO:0044183	ANIA_00381 ANIA_01851 ANIA_03070 ANIA_03134 ANIA_04616 ANIA_05713
0.0281184	18	100	2.02277	Mitotic nuclear division	http://amigo.geneontology.org/amigo/term/GO:0140014	ANIA_00808 ANIA_00905 ANIA_01182 ANIA_01560 ANIA_02128 ANIA_02160 ANIA_02511 ANIA_02927 ANIA_03941 ANIA_03946 ANIA_04513 ANIA_05057 ANIA_05717 ANIA_06340 ANIA_06865 ANIA_07296 ANIA_10137 ANIA_10433
0.0284458	19	108	1.97699	Cell division	http://amigo.geneontology.org/amigo/term/GO:0051301	ANIA_00814 ANIA_00905 ANIA_01394 ANIA_01560 ANIA_02128 ANIA_02511 ANIA_02862 ANIA_03941 ANIA_04667 ANIA_05057 ANIA_05676 ANIA_05815 ANIA_06688 ANIA_07032 ANIA_07296 ANIA_08182 ANIA_08783 ANIA_10433 ANIA_10635
0.028538	7	23	3.42014	Mitotic spindle	http://amigo.geneontology.org/amigo/term/GO:0072686	ANIA_02128 ANIA_04513 ANIA_05057 ANIA_06340 ANIA_06865 ANIA_08783 ANIA_10137
0.028538	7	25	3.42014	de novo protein folding	http://amigo.geneontology.org/amigo/term/GO:0006458	ANIA_00381 ANIA_01851 ANIA_03070 ANIA_03134 ANIA_04616 ANIA_05713 ANIA_07143
0.028538	7	23	3.42014	Ribosome binding	http://amigo.geneontology.org/amigo/term/GO:0043022	ANIA_03055 ANIA_03096 ANIA_04163 ANIA_06651 ANIA_07143 ANIA_07721 ANIA_10315
0.0287341	8	29	3.10003	Regulation of nuclear division	http://amigo.geneontology.org/amigo/term/GO:0051783	ANIA_00808 ANIA_00905 ANIA_02511 ANIA_02927 ANIA_03941 ANIA_03946 ANIA_05717 ANIA_10433
0.0287341	8	29	3.10003	Mitotic spindle organization	http://amigo.geneontology.org/amigo/term/GO:0007052	ANIA_01182 ANIA_01560 ANIA_02128 ANIA_05057 ANIA_05815 ANIA_06340 ANIA_06865 ANIA_10137
0.0297704	10	42	2.67562	Protein localization to nucleus	http://amigo.geneontology.org/amigo/term/GO:0034504	ANIA_00906 ANIA_02120 ANIA_02431 ANIA_03167 ANIA_05717 ANIA_06006 ANIA_06591 ANIA_06738 ANIA_10112 ANIA_10895
0.0304049	4	8	5.61881	Posttranscriptional gene silencing	http://amigo.geneontology.org/amigo/term/GO:0016441	ANIA_00997 ANIA_02717 ANIA_05408 ANIA_06507
0.0304049	4	8	5.61881	DsRNA processing	http://amigo.geneontology.org/amigo/term/GO:0031050	ANIA_00997 ANIA_02717 ANIA_05408 ANIA_06507
0.0304049	4	8	5.61881	Post-transcriptional gene silencing by RNA	http://amigo.geneontology.org/amigo/term/GO:0035194	ANIA_00997 ANIA_02717 ANIA_05408 ANIA_06507
0.0304049	4	8	5.61881	Production of small RNA involved in gene silencing by RNA	http://amigo.geneontology.org/amigo/term/GO:0070918	ANIA_00997 ANIA_02717 ANIA_05408 ANIA_06507
0.0304049	4	8	5.61881	DNA unwinding involved in DNA replication	http://amigo.geneontology.org/amigo/term/GO:0006268	ANIA_00228 ANIA_02491 ANIA_05992 ANIA_06070
0.0304049	12	56	2.40806	Regulation of mitotic cell cycle phase transition	http://amigo.geneontology.org/amigo/term/GO:1901990	ANIA_00905 ANIA_02511 ANIA_02927 ANIA_02969 ANIA_03941 ANIA_03946 ANIA_04571 ANIA_05057 ANIA_05676 ANIA_05717 ANIA_06896 ANIA_10433
0.0325642	9	37	2.8094	Microtubule associated complex	http://amigo.geneontology.org/amigo/term/GO:0005875	ANIA_00118 ANIA_01953 ANIA_03124 ANIA_03721 ANIA_04513 ANIA_04664 ANIA_05815 ANIA_06340 ANIA_06863
0.0330088	6	18	3.74587	Mitotic DNA replication	http://amigo.geneontology.org/amigo/term/GO:1902969	ANIA_00228 ANIA_02491 ANIA_03067 ANIA_06070 ANIA_10497 ANIA_10755
0.0349347	68	562	1.37686	Cellular localization	http://amigo.geneontology.org/amigo/term/GO:0051641	ANIA_00118 ANIA_00316 ANIA_00417 ANIA_00753 ANIA_00834 ANIA_00843 ANIA_00844 ANIA_00906 ANIA_01099 ANIA_01177 ANIA_01182 ANIA_01238 ANIA_01256 ANIA_01394 ANIA_01560 ANIA_01953 ANIA_02120 ANIA_02210 ANIA_02262 ANIA_02431 ANIA_02738 ANIA_02862 ANIA_02927 ANIA_03026 ANIA_03080 ANIA_03167 ANIA_03172 ANIA_03413 ANIA_03745 ANIA_04087 ANIA_04317 ANIA_04417 ANIA_04617 ANIA_04664 ANIA_04667 ANIA_04906 ANI…
0.0349347	12	57	2.36581	Microtubule	http://amigo.geneontology.org/amigo/term/GO:0005874	ANIA_00118 ANIA_00316 ANIA_01182 ANIA_02862 ANIA_03124 ANIA_03721 ANIA_04513 ANIA_05815 ANIA_06340 ANIA_06838 ANIA_06863 ANIA_08851
0.0354468	5	13	4.32216	Replisome	http://amigo.geneontology.org/amigo/term/GO:0030894	ANIA_00260 ANIA_03033 ANIA_10470 ANIA_10755 ANIA_10855
0.0354468	5	13	4.32216	Nuclear replisome	http://amigo.geneontology.org/amigo/term/GO:0043601	ANIA_00260 ANIA_03033 ANIA_10470 ANIA_10755 ANIA_10855
0.0362873	14	72	2.18509	Nuclear envelope	http://amigo.geneontology.org/amigo/term/GO:0005635	ANIA_00906 ANIA_01238 ANIA_02120 ANIA_02431 ANIA_02511 ANIA_04317 ANIA_04417 ANIA_05717 ANIA_06006 ANIA_06591 ANIA_06738 ANIA_06865 ANIA_10002 ANIA_10112
0.0381008	13	66	2.24752	Nucleic acid transport	http://amigo.geneontology.org/amigo/term/GO:0050657	ANIA_00843 ANIA_03172 ANIA_03413 ANIA_04000 ANIA_04087 ANIA_04317 ANIA_04417 ANIA_05717 ANIA_06507 ANIA_06556 ANIA_06651 ANIA_06738 ANIA_10112
0.0381008	13	66	2.24752	RNA transport	http://amigo.geneontology.org/amigo/term/GO:0050658	ANIA_00843 ANIA_03172 ANIA_03413 ANIA_04000 ANIA_04087 ANIA_04317 ANIA_04417 ANIA_05717 ANIA_06507 ANIA_06556 ANIA_06651 ANIA_06738 ANIA_10112
0.0381008	13	66	2.24752	Establishment of RNA localization	http://amigo.geneontology.org/amigo/term/GO:0051236	ANIA_00843 ANIA_03172 ANIA_03413 ANIA_04000 ANIA_04087 ANIA_04317 ANIA_04417 ANIA_05717 ANIA_06507 ANIA_06556 ANIA_06651 ANIA_06738 ANIA_10112
0.0392215	29	197	1.66271	Regulation of protein metabolic process	http://amigo.geneontology.org/amigo/term/GO:0051246	ANIA_00814 ANIA_00906 ANIA_00974 ANIA_01256 ANIA_02137 ANIA_03055 ANIA_03411 ANIA_03413 ANIA_03795 ANIA_03941 ANIA_04000 ANIA_04163 ANIA_04202 ANIA_04571 ANIA_04617 ANIA_04803 ANIA_05111 ANIA_05717 ANIA_05719 ANIA_06244 ANIA_06651 ANIA_06865 ANIA_07554 ANIA_09090 ANIA_09093 ANIA_10173 ANIA_10182 ANIA_10315 ANIA_11032
0.0397943	17	96	1.98999	Cell cycle phase transition	http://amigo.geneontology.org/amigo/term/GO:0044770	ANIA_00808 ANIA_00905 ANIA_01560 ANIA_02137 ANIA_02511 ANIA_02927 ANIA_02969 ANIA_03795 ANIA_03941 ANIA_03946 ANIA_04571 ANIA_05057 ANIA_05406 ANIA_05676 ANIA_05717 ANIA_06896 ANIA_10433
0.0412338	22	139	1.80458	Nuclear division	http://amigo.geneontology.org/amigo/term/GO:0000280	ANIA_00316 ANIA_00808 ANIA_00905 ANIA_01182 ANIA_01560 ANIA_02068 ANIA_02128 ANIA_02160 ANIA_02511 ANIA_02927 ANIA_03941 ANIA_03946 ANIA_04513 ANIA_05057 ANIA_05406 ANIA_05717 ANIA_06340 ANIA_06865 ANIA_07296 ANIA_08783 ANIA_10137 ANIA_10433
0.0429895	6	19	3.54872	Negative regulation of chromosome organization	http://amigo.geneontology.org/amigo/term/GO:2001251	ANIA_02491 ANIA_02511 ANIA_02927 ANIA_03946 ANIA_06070 ANIA_11066
0.0459148	9	41	2.66154	Nucleocytoplasmic transport	http://www.genome.jp/kegg-bin/show_pathway?ani03013	ANIA_00906 ANIA_01238 ANIA_02120 ANIA_02431 ANIA_04317 ANIA_05717 ANIA_06006 ANIA_06507 ANIA_06591
0.0480703	4	9	4.99449	RRNA pseudouridine synthesis	http://amigo.geneontology.org/amigo/term/GO:0031118	ANIA_00695 ANIA_08254 ANIA_08851 ANIA_10712
0.0480703	4	9	4.99449	Double-stranded RNA binding	http://amigo.geneontology.org/amigo/term/GO:0003725	ANIA_00997 ANIA_03427 ANIA_05408 ANIA_07350
0.0480703	4	9	4.99449	Nucleocytoplasmic carrier activity	http://amigo.geneontology.org/amigo/term/GO:0140142	ANIA_00906 ANIA_02120 ANIA_05717 ANIA_06591
0.0489506	5	14	4.01343	Pseudouridine synthesis	http://amigo.geneontology.org/amigo/term/GO:0001522	ANIA_00695 ANIA_00728 ANIA_08254 ANIA_08851 ANIA_10712
0.0489506	5	16	4.01343	Polysome	http://amigo.geneontology.org/amigo/term/GO:0005844	ANIA_02068 ANIA_04616 ANIA_06651 ANIA_07143 ANIA_07350
Species	Type of genes	Criteria	Number of genes
A. nidulans	downregulated	DEG	3763
Enrichment FDR	nGenes	Pathway Genes	Fold Enrichment	Pathway	URL	Genes
3.4761e-97	599	856	1.94813	Non-membrane-bounded organelle	http://amigo.geneontology.org/amigo/term/GO:0043228	ANIA_00038 ANIA_00044 ANIA_00074 ANIA_00083 ANIA_00092 ANIA_00108 ANIA_00116 ANIA_00118 ANIA_00123 ANIA_00126 ANIA_00142 ANIA_00143 ANIA_00153 ANIA_00166 ANIA_00189 ANIA_00192 ANIA_00204 ANIA_00237 ANIA_00247 ANIA_00260 ANIA_00262 ANIA_00276 ANIA_00278 ANIA_00305 ANIA_00316 ANIA_00327 ANIA_00359 ANIA_00406 ANIA_00420 ANIA_00421 ANIA_00433 ANIA_00442 ANIA_00445 ANIA_00461 ANIA_00465 ANIA_00475 ANI…
3.4761e-97	599	856	1.94813	Intracellular non-membrane-bounded organelle	http://amigo.geneontology.org/amigo/term/GO:0043232	ANIA_00038 ANIA_00044 ANIA_00074 ANIA_00083 ANIA_00092 ANIA_00108 ANIA_00116 ANIA_00118 ANIA_00123 ANIA_00126 ANIA_00142 ANIA_00143 ANIA_00153 ANIA_00166 ANIA_00189 ANIA_00192 ANIA_00204 ANIA_00237 ANIA_00247 ANIA_00260 ANIA_00262 ANIA_00276 ANIA_00278 ANIA_00305 ANIA_00316 ANIA_00327 ANIA_00359 ANIA_00406 ANIA_00420 ANIA_00421 ANIA_00433 ANIA_00442 ANIA_00445 ANIA_00461 ANIA_00465 ANIA_00475 ANI…
5.47191e-77	923	1620	1.58593	Protein-containing complex	http://amigo.geneontology.org/amigo/term/GO:0032991	ANIA_00065 ANIA_00067 ANIA_00068 ANIA_00074 ANIA_00081 ANIA_00083 ANIA_00084 ANIA_00092 ANIA_00109 ANIA_00111 ANIA_00116 ANIA_00118 ANIA_00123 ANIA_00124 ANIA_00126 ANIA_00133 ANIA_00138 ANIA_00142 ANIA_00143 ANIA_00153 ANIA_00161 ANIA_00162 ANIA_00166 ANIA_00189 ANIA_00190 ANIA_00192 ANIA_00211 ANIA_00228 ANIA_00242 ANIA_00244 ANIA_00247 ANIA_00252 ANIA_00260 ANIA_00261 ANIA_00262 ANIA_00276 ANI…
1.38712e-66	226	259	2.44719	Ribosome biogenesis	http://amigo.geneontology.org/amigo/term/GO:0042254	ANIA_00074 ANIA_00092 ANIA_00116 ANIA_00124 ANIA_00189 ANIA_00204 ANIA_00237 ANIA_00247 ANIA_00262 ANIA_00305 ANIA_00327 ANIA_00421 ANIA_00448 ANIA_00465 ANIA_00475 ANIA_00570 ANIA_00583 ANIA_00589 ANIA_00625 ANIA_00637 ANIA_00647 ANIA_00659 ANIA_00695 ANIA_00707 ANIA_00728 ANIA_00745 ANIA_00796 ANIA_00843 ANIA_00844 ANIA_00944 ANIA_00946 ANIA_01013 ANIA_01122 ANIA_01158 ANIA_01164 ANIA_01166 ANI…
1.00546e-65	267	326	2.28957	Ribonucleoprotein complex biogenesis	http://amigo.geneontology.org/amigo/term/GO:0022613	ANIA_00074 ANIA_00092 ANIA_00111 ANIA_00116 ANIA_00124 ANIA_00189 ANIA_00204 ANIA_00237 ANIA_00247 ANIA_00262 ANIA_00305 ANIA_00327 ANIA_00359 ANIA_00421 ANIA_00448 ANIA_00465 ANIA_00475 ANIA_00570 ANIA_00583 ANIA_00589 ANIA_00625 ANIA_00637 ANIA_00647 ANIA_00659 ANIA_00695 ANIA_00707 ANIA_00728 ANIA_00745 ANIA_00796 ANIA_00843 ANIA_00844 ANIA_00944 ANIA_00946 ANIA_01013 ANIA_01122 ANIA_01158 ANI…
9.44727e-61	310	409	2.10831	Ribonucleoprotein complex	http://amigo.geneontology.org/amigo/term/GO:1990904	ANIA_00068 ANIA_00074 ANIA_00092 ANIA_00109 ANIA_00111 ANIA_00116 ANIA_00123 ANIA_00124 ANIA_00133 ANIA_00142 ANIA_00189 ANIA_00211 ANIA_00242 ANIA_00247 ANIA_00262 ANIA_00278 ANIA_00282 ANIA_00305 ANIA_00359 ANIA_00421 ANIA_00433 ANIA_00442 ANIA_00445 ANIA_00448 ANIA_00465 ANIA_00475 ANIA_00476 ANIA_00570 ANIA_00643 ANIA_00647 ANIA_00695 ANIA_00727 ANIA_00728 ANIA_00745 ANIA_00753 ANIA_00776 ANI…
5.23986e-58	237	289	2.28813	NcRNA processing	http://amigo.geneontology.org/amigo/term/GO:0034470	ANIA_00062 ANIA_00072 ANIA_00074 ANIA_00092 ANIA_00114 ANIA_00124 ANIA_00128 ANIA_00130 ANIA_00141 ANIA_00161 ANIA_00189 ANIA_00190 ANIA_00204 ANIA_00237 ANIA_00247 ANIA_00305 ANIA_00327 ANIA_00421 ANIA_00448 ANIA_00465 ANIA_00475 ANIA_00502 ANIA_00583 ANIA_00589 ANIA_00625 ANIA_00637 ANIA_00647 ANIA_00695 ANIA_00707 ANIA_00745 ANIA_00757 ANIA_00796 ANIA_00804 ANIA_00818 ANIA_00944 ANIA_00956 ANI…
1.46993e-56	858	1588	1.50803	Gene expression	http://amigo.geneontology.org/amigo/term/GO:0010467	ANIA_00062 ANIA_00072 ANIA_00074 ANIA_00083 ANIA_00092 ANIA_00105 ANIA_00109 ANIA_00111 ANIA_00114 ANIA_00116 ANIA_00123 ANIA_00124 ANIA_00128 ANIA_00130 ANIA_00133 ANIA_00134 ANIA_00138 ANIA_00139 ANIA_00141 ANIA_00142 ANIA_00161 ANIA_00189 ANIA_00190 ANIA_00192 ANIA_00204 ANIA_00211 ANIA_00237 ANIA_00242 ANIA_00247 ANIA_00262 ANIA_00278 ANIA_00279 ANIA_00282 ANIA_00291 ANIA_00292 ANIA_00305 ANI…
1.95358e-55	260	333	2.1755	NcRNA metabolic process	http://amigo.geneontology.org/amigo/term/GO:0034660	ANIA_00062 ANIA_00072 ANIA_00074 ANIA_00092 ANIA_00114 ANIA_00124 ANIA_00128 ANIA_00130 ANIA_00141 ANIA_00161 ANIA_00189 ANIA_00190 ANIA_00204 ANIA_00237 ANIA_00247 ANIA_00305 ANIA_00327 ANIA_00421 ANIA_00428 ANIA_00448 ANIA_00465 ANIA_00475 ANIA_00502 ANIA_00583 ANIA_00589 ANIA_00625 ANIA_00637 ANIA_00647 ANIA_00695 ANIA_00707 ANIA_00745 ANIA_00757 ANIA_00796 ANIA_00804 ANIA_00818 ANIA_00936 ANI…
4.88233e-54	169	186	2.5224	RRNA processing	http://amigo.geneontology.org/amigo/term/GO:0006364	ANIA_00074 ANIA_00092 ANIA_00124 ANIA_00189 ANIA_00204 ANIA_00237 ANIA_00247 ANIA_00305 ANIA_00327 ANIA_00421 ANIA_00448 ANIA_00465 ANIA_00475 ANIA_00583 ANIA_00589 ANIA_00625 ANIA_00637 ANIA_00647 ANIA_00695 ANIA_00707 ANIA_00745 ANIA_00796 ANIA_00944 ANIA_01122 ANIA_01158 ANIA_01164 ANIA_01175 ANIA_01228 ANIA_01319 ANIA_01354 ANIA_01367 ANIA_01434 ANIA_01452 ANIA_01474 ANIA_01533 ANIA_01750 ANI…
2.39225e-53	406	614	1.8408	Membrane-enclosed lumen	http://amigo.geneontology.org/amigo/term/GO:0031974	ANIA_00065 ANIA_00074 ANIA_00083 ANIA_00092 ANIA_00116 ANIA_00123 ANIA_00126 ANIA_00138 ANIA_00142 ANIA_00189 ANIA_00192 ANIA_00204 ANIA_00237 ANIA_00247 ANIA_00259 ANIA_00260 ANIA_00292 ANIA_00305 ANIA_00327 ANIA_00421 ANIA_00429 ANIA_00440 ANIA_00442 ANIA_00461 ANIA_00475 ANIA_00476 ANIA_00551 ANIA_00582 ANIA_00583 ANIA_00589 ANIA_00625 ANIA_00637 ANIA_00647 ANIA_00659 ANIA_00668 ANIA_00678 ANI…
2.39225e-53	406	614	1.8408	Organelle lumen	http://amigo.geneontology.org/amigo/term/GO:0043233	ANIA_00065 ANIA_00074 ANIA_00083 ANIA_00092 ANIA_00116 ANIA_00123 ANIA_00126 ANIA_00138 ANIA_00142 ANIA_00189 ANIA_00192 ANIA_00204 ANIA_00237 ANIA_00247 ANIA_00259 ANIA_00260 ANIA_00292 ANIA_00305 ANIA_00327 ANIA_00421 ANIA_00429 ANIA_00440 ANIA_00442 ANIA_00461 ANIA_00475 ANIA_00476 ANIA_00551 ANIA_00582 ANIA_00583 ANIA_00589 ANIA_00625 ANIA_00637 ANIA_00647 ANIA_00659 ANIA_00668 ANIA_00678 ANI…
2.39225e-53	406	614	1.8408	Intracellular organelle lumen	http://amigo.geneontology.org/amigo/term/GO:0070013	ANIA_00065 ANIA_00074 ANIA_00083 ANIA_00092 ANIA_00116 ANIA_00123 ANIA_00126 ANIA_00138 ANIA_00142 ANIA_00189 ANIA_00192 ANIA_00204 ANIA_00237 ANIA_00247 ANIA_00259 ANIA_00260 ANIA_00292 ANIA_00305 ANIA_00327 ANIA_00421 ANIA_00429 ANIA_00440 ANIA_00442 ANIA_00461 ANIA_00475 ANIA_00476 ANIA_00551 ANIA_00582 ANIA_00583 ANIA_00589 ANIA_00625 ANIA_00637 ANIA_00647 ANIA_00659 ANIA_00668 ANIA_00678 ANI…
1.07919e-51	169	189	2.48215	RRNA metabolic process	http://amigo.geneontology.org/amigo/term/GO:0016072	ANIA_00074 ANIA_00092 ANIA_00124 ANIA_00189 ANIA_00204 ANIA_00237 ANIA_00247 ANIA_00305 ANIA_00327 ANIA_00421 ANIA_00448 ANIA_00465 ANIA_00475 ANIA_00583 ANIA_00589 ANIA_00625 ANIA_00637 ANIA_00647 ANIA_00695 ANIA_00707 ANIA_00745 ANIA_00796 ANIA_00944 ANIA_01122 ANIA_01158 ANIA_01164 ANIA_01175 ANIA_01228 ANIA_01319 ANIA_01354 ANIA_01367 ANIA_01434 ANIA_01452 ANIA_01474 ANIA_01533 ANIA_01750 ANI…
1.65913e-51	309	432	1.99349	Nuclear lumen	http://amigo.geneontology.org/amigo/term/GO:0031981	ANIA_00065 ANIA_00074 ANIA_00083 ANIA_00092 ANIA_00126 ANIA_00138 ANIA_00189 ANIA_00192 ANIA_00204 ANIA_00237 ANIA_00247 ANIA_00260 ANIA_00292 ANIA_00305 ANIA_00327 ANIA_00421 ANIA_00440 ANIA_00442 ANIA_00461 ANIA_00475 ANIA_00582 ANIA_00583 ANIA_00589 ANIA_00625 ANIA_00637 ANIA_00647 ANIA_00659 ANIA_00668 ANIA_00678 ANIA_00695 ANIA_00745 ANIA_00752 ANIA_00794 ANIA_00796 ANIA_00808 ANIA_00814 ANI…
7.46908e-50	348	515	1.89527	RNA binding	http://amigo.geneontology.org/amigo/term/GO:0003723	ANIA_00062 ANIA_00072 ANIA_00105 ANIA_00109 ANIA_00116 ANIA_00123 ANIA_00133 ANIA_00138 ANIA_00142 ANIA_00189 ANIA_00204 ANIA_00211 ANIA_00228 ANIA_00242 ANIA_00247 ANIA_00262 ANIA_00282 ANIA_00292 ANIA_00305 ANIA_00312 ANIA_00359 ANIA_00406 ANIA_00421 ANIA_00428 ANIA_00433 ANIA_00434 ANIA_00445 ANIA_00570 ANIA_00583 ANIA_00589 ANIA_00625 ANIA_00643 ANIA_00647 ANIA_00695 ANIA_00707 ANIA_00728 ANI…
1.80327e-49	178	207	2.39754	Nucleolus	http://amigo.geneontology.org/amigo/term/GO:0005730	ANIA_00074 ANIA_00092 ANIA_00189 ANIA_00192 ANIA_00204 ANIA_00237 ANIA_00247 ANIA_00305 ANIA_00421 ANIA_00442 ANIA_00461 ANIA_00475 ANIA_00583 ANIA_00589 ANIA_00625 ANIA_00637 ANIA_00647 ANIA_00659 ANIA_00678 ANIA_00695 ANIA_00752 ANIA_00796 ANIA_00844 ANIA_00894 ANIA_00944 ANIA_00946 ANIA_01152 ANIA_01164 ANIA_01215 ANIA_01255 ANIA_01272 ANIA_01319 ANIA_01354 ANIA_01367 ANIA_01391 ANIA_01434 ANI…
1.50468e-48	313	448	1.94653	RNA processing	http://amigo.geneontology.org/amigo/term/GO:0006396	ANIA_00062 ANIA_00072 ANIA_00074 ANIA_00092 ANIA_00109 ANIA_00111 ANIA_00114 ANIA_00124 ANIA_00128 ANIA_00130 ANIA_00133 ANIA_00141 ANIA_00161 ANIA_00189 ANIA_00190 ANIA_00204 ANIA_00211 ANIA_00237 ANIA_00247 ANIA_00305 ANIA_00327 ANIA_00421 ANIA_00448 ANIA_00465 ANIA_00475 ANIA_00502 ANIA_00583 ANIA_00589 ANIA_00625 ANIA_00637 ANIA_00647 ANIA_00695 ANIA_00707 ANIA_00727 ANIA_00745 ANIA_00757 ANI…
5.97929e-48	174	201	2.3903	Structural molecule activity	http://amigo.geneontology.org/amigo/term/GO:0005198	ANIA_00116 ANIA_00123 ANIA_00142 ANIA_00262 ANIA_00278 ANIA_00316 ANIA_00433 ANIA_00445 ANIA_00465 ANIA_00476 ANIA_00570 ANIA_00665 ANIA_00676 ANIA_00776 ANIA_00843 ANIA_00907 ANIA_01005 ANIA_01013 ANIA_01064 ANIA_01095 ANIA_01122 ANIA_01166 ANIA_01177 ANIA_01182 ANIA_01190 ANIA_01228 ANIA_01238 ANIA_01345 ANIA_01348 ANIA_01393 ANIA_01636 ANIA_01770 ANIA_01954 ANIA_01964 ANIA_02050 ANIA_02057 ANI…
1.38565e-44	128	136	2.59878	Structural constituent of ribosome	http://amigo.geneontology.org/amigo/term/GO:0003735	ANIA_00116 ANIA_00123 ANIA_00142 ANIA_00262 ANIA_00278 ANIA_00433 ANIA_00445 ANIA_00465 ANIA_00476 ANIA_00570 ANIA_00776 ANIA_00843 ANIA_00907 ANIA_01013 ANIA_01095 ANIA_01122 ANIA_01166 ANIA_01228 ANIA_01345 ANIA_01348 ANIA_01393 ANIA_01636 ANIA_01770 ANIA_01954 ANIA_01964 ANIA_02057 ANIA_02268 ANIA_02275 ANIA_02301 ANIA_02734 ANIA_02906 ANIA_02949 ANIA_02980 ANIA_03172 ANIA_03173 ANIA_03413 ANI…
6.55249e-43	727	1371	1.48147	Cellular component organization or biogenesis	http://amigo.geneontology.org/amigo/term/GO:0071840	ANIA_00038 ANIA_00043 ANIA_00074 ANIA_00083 ANIA_00084 ANIA_00086 ANIA_00092 ANIA_00106 ANIA_00108 ANIA_00111 ANIA_00116 ANIA_00118 ANIA_00124 ANIA_00127 ANIA_00133 ANIA_00143 ANIA_00153 ANIA_00162 ANIA_00189 ANIA_00204 ANIA_00228 ANIA_00237 ANIA_00244 ANIA_00247 ANIA_00261 ANIA_00262 ANIA_00305 ANIA_00316 ANIA_00327 ANIA_00359 ANIA_00383 ANIA_00393 ANIA_00414 ANIA_00421 ANIA_00424 ANIA_00429 ANI…
1.08408e-40	143	163	2.42241	Ribosome	http://amigo.geneontology.org/amigo/term/GO:0005840	ANIA_00116 ANIA_00123 ANIA_00142 ANIA_00262 ANIA_00278 ANIA_00433 ANIA_00445 ANIA_00465 ANIA_00476 ANIA_00570 ANIA_00776 ANIA_00843 ANIA_00907 ANIA_00997 ANIA_01013 ANIA_01095 ANIA_01122 ANIA_01166 ANIA_01228 ANIA_01256 ANIA_01270 ANIA_01328 ANIA_01345 ANIA_01348 ANIA_01393 ANIA_01636 ANIA_01770 ANIA_01954 ANIA_01964 ANIA_02057 ANIA_02246 ANIA_02268 ANIA_02275 ANIA_02301 ANIA_02734 ANIA_02775 ANI…
3.05691e-39	128	142	2.48897	Ribosomal subunit	http://amigo.geneontology.org/amigo/term/GO:0044391	ANIA_00116 ANIA_00123 ANIA_00142 ANIA_00262 ANIA_00278 ANIA_00433 ANIA_00445 ANIA_00465 ANIA_00476 ANIA_00570 ANIA_00776 ANIA_00843 ANIA_00907 ANIA_01013 ANIA_01095 ANIA_01122 ANIA_01166 ANIA_01228 ANIA_01345 ANIA_01348 ANIA_01393 ANIA_01636 ANIA_01770 ANIA_01954 ANIA_01964 ANIA_02057 ANIA_02268 ANIA_02275 ANIA_02301 ANIA_02734 ANIA_02775 ANIA_02906 ANIA_02949 ANIA_02980 ANIA_03096 ANIA_03172 ANI…
1.82075e-38	237	333	1.98305	Translation	http://amigo.geneontology.org/amigo/term/GO:0006412	ANIA_00105 ANIA_00116 ANIA_00123 ANIA_00142 ANIA_00262 ANIA_00278 ANIA_00292 ANIA_00312 ANIA_00359 ANIA_00406 ANIA_00428 ANIA_00433 ANIA_00445 ANIA_00465 ANIA_00476 ANIA_00570 ANIA_00641 ANIA_00695 ANIA_00720 ANIA_00776 ANIA_00794 ANIA_00843 ANIA_00872 ANIA_00907 ANIA_00936 ANIA_00974 ANIA_01013 ANIA_01080 ANIA_01084 ANIA_01095 ANIA_01122 ANIA_01157 ANIA_01162 ANIA_01166 ANIA_01201 ANIA_01228 ANI…
1.9186e-38	452	776	1.62933	Cellular component biogenesis	http://amigo.geneontology.org/amigo/term/GO:0044085	ANIA_00043 ANIA_00074 ANIA_00086 ANIA_00092 ANIA_00106 ANIA_00108 ANIA_00111 ANIA_00116 ANIA_00124 ANIA_00127 ANIA_00189 ANIA_00204 ANIA_00228 ANIA_00237 ANIA_00247 ANIA_00262 ANIA_00305 ANIA_00316 ANIA_00327 ANIA_00359 ANIA_00383 ANIA_00393 ANIA_00421 ANIA_00439 ANIA_00448 ANIA_00465 ANIA_00475 ANIA_00558 ANIA_00559 ANIA_00570 ANIA_00583 ANIA_00589 ANIA_00625 ANIA_00637 ANIA_00643 ANIA_00647 ANI…
1.92953e-36	245	355	1.92734	Peptide biosynthetic process	http://amigo.geneontology.org/amigo/term/GO:0043043	ANIA_00105 ANIA_00116 ANIA_00123 ANIA_00142 ANIA_00262 ANIA_00278 ANIA_00292 ANIA_00312 ANIA_00359 ANIA_00406 ANIA_00428 ANIA_00433 ANIA_00445 ANIA_00465 ANIA_00476 ANIA_00570 ANIA_00607 ANIA_00641 ANIA_00695 ANIA_00720 ANIA_00776 ANIA_00794 ANIA_00843 ANIA_00872 ANIA_00907 ANIA_00936 ANIA_00974 ANIA_01013 ANIA_01080 ANIA_01084 ANIA_01095 ANIA_01122 ANIA_01157 ANIA_01162 ANIA_01166 ANIA_01201 ANI…
2.32222e-36	901	1846	1.37071	Nucleobase-containing compound metabolic process	http://amigo.geneontology.org/amigo/term/GO:0006139	ANIA_00038 ANIA_00044 ANIA_00062 ANIA_00067 ANIA_00072 ANIA_00074 ANIA_00076 ANIA_00083 ANIA_00092 ANIA_00109 ANIA_00111 ANIA_00114 ANIA_00124 ANIA_00126 ANIA_00128 ANIA_00130 ANIA_00133 ANIA_00134 ANIA_00138 ANIA_00141 ANIA_00153 ANIA_00161 ANIA_00189 ANIA_00190 ANIA_00192 ANIA_00204 ANIA_00211 ANIA_00228 ANIA_00237 ANIA_00242 ANIA_00247 ANIA_00252 ANIA_00258 ANIA_00259 ANIA_00260 ANIA_00271 ANI…
2.46226e-36	960	1990	1.35312	Heterocycle metabolic process	http://amigo.geneontology.org/amigo/term/GO:0046483	ANIA_00038 ANIA_00044 ANIA_00062 ANIA_00067 ANIA_00072 ANIA_00074 ANIA_00076 ANIA_00081 ANIA_00083 ANIA_00092 ANIA_00106 ANIA_00109 ANIA_00111 ANIA_00114 ANIA_00124 ANIA_00126 ANIA_00128 ANIA_00130 ANIA_00133 ANIA_00134 ANIA_00138 ANIA_00141 ANIA_00150 ANIA_00153 ANIA_00161 ANIA_00189 ANIA_00190 ANIA_00192 ANIA_00204 ANIA_00211 ANIA_00228 ANIA_00237 ANIA_00242 ANIA_00247 ANIA_00252 ANIA_00258 ANI…
9.71035e-35	272	413	1.8363	Amide biosynthetic process	http://amigo.geneontology.org/amigo/term/GO:0043604	ANIA_00105 ANIA_00106 ANIA_00116 ANIA_00123 ANIA_00142 ANIA_00262 ANIA_00278 ANIA_00292 ANIA_00312 ANIA_00359 ANIA_00406 ANIA_00428 ANIA_00433 ANIA_00445 ANIA_00465 ANIA_00476 ANIA_00554 ANIA_00565 ANIA_00570 ANIA_00607 ANIA_00641 ANIA_00651 ANIA_00695 ANIA_00720 ANIA_00776 ANIA_00794 ANIA_00843 ANIA_00872 ANIA_00907 ANIA_00936 ANIA_00974 ANIA_01013 ANIA_01080 ANIA_01084 ANIA_01095 ANIA_01122 ANI…
1.14362e-34	961	1997	1.34287	Nucleus	http://amigo.geneontology.org/amigo/term/GO:0005634	ANIA_00038 ANIA_00044 ANIA_00065 ANIA_00067 ANIA_00074 ANIA_00083 ANIA_00084 ANIA_00092 ANIA_00105 ANIA_00109 ANIA_00111 ANIA_00117 ANIA_00124 ANIA_00126 ANIA_00133 ANIA_00134 ANIA_00138 ANIA_00143 ANIA_00153 ANIA_00161 ANIA_00162 ANIA_00166 ANIA_00189 ANIA_00190 ANIA_00192 ANIA_00204 ANIA_00211 ANIA_00214 ANIA_00228 ANIA_00237 ANIA_00242 ANIA_00247 ANIA_00258 ANIA_00260 ANIA_00276 ANIA_00279 ANI…
2.07134e-32	778	1575	1.38505	Nucleic acid metabolic process	http://amigo.geneontology.org/amigo/term/GO:0090304	ANIA_00038 ANIA_00044 ANIA_00062 ANIA_00072 ANIA_00074 ANIA_00076 ANIA_00083 ANIA_00092 ANIA_00109 ANIA_00111 ANIA_00114 ANIA_00124 ANIA_00126 ANIA_00128 ANIA_00130 ANIA_00133 ANIA_00134 ANIA_00138 ANIA_00141 ANIA_00153 ANIA_00161 ANIA_00189 ANIA_00190 ANIA_00192 ANIA_00204 ANIA_00211 ANIA_00228 ANIA_00237 ANIA_00242 ANIA_00247 ANIA_00258 ANIA_00260 ANIA_00279 ANIA_00282 ANIA_00291 ANIA_00292 ANI…
3.44697e-31	258	398	1.8081	Peptide metabolic process	http://amigo.geneontology.org/amigo/term/GO:0006518	ANIA_00009 ANIA_00105 ANIA_00116 ANIA_00123 ANIA_00142 ANIA_00262 ANIA_00278 ANIA_00292 ANIA_00312 ANIA_00359 ANIA_00406 ANIA_00428 ANIA_00433 ANIA_00445 ANIA_00465 ANIA_00476 ANIA_00570 ANIA_00607 ANIA_00641 ANIA_00695 ANIA_00720 ANIA_00776 ANIA_00794 ANIA_00843 ANIA_00872 ANIA_00907 ANIA_00936 ANIA_00974 ANIA_01013 ANIA_01080 ANIA_01084 ANIA_01095 ANIA_01122 ANIA_01157 ANIA_01162 ANIA_01166 ANI…
7.6197e-31	340	569	1.66456	Nuclear protein-containing complex	http://amigo.geneontology.org/amigo/term/GO:0140513	ANIA_00065 ANIA_00083 ANIA_00084 ANIA_00109 ANIA_00111 ANIA_00126 ANIA_00133 ANIA_00138 ANIA_00143 ANIA_00153 ANIA_00161 ANIA_00162 ANIA_00189 ANIA_00190 ANIA_00192 ANIA_00211 ANIA_00260 ANIA_00276 ANIA_00282 ANIA_00291 ANIA_00292 ANIA_00305 ANIA_00321 ANIA_00327 ANIA_00420 ANIA_00421 ANIA_00434 ANIA_00440 ANIA_00442 ANIA_00576 ANIA_00582 ANIA_00647 ANIA_00668 ANIA_00695 ANIA_00699 ANIA_00727 ANI…
3.67958e-30	307	504	1.70219	Cellular amide metabolic process	http://amigo.geneontology.org/amigo/term/GO:0043603	ANIA_00009 ANIA_00105 ANIA_00106 ANIA_00116 ANIA_00123 ANIA_00142 ANIA_00262 ANIA_00278 ANIA_00292 ANIA_00312 ANIA_00359 ANIA_00406 ANIA_00418 ANIA_00428 ANIA_00433 ANIA_00445 ANIA_00465 ANIA_00476 ANIA_00554 ANIA_00565 ANIA_00570 ANIA_00607 ANIA_00641 ANIA_00651 ANIA_00695 ANIA_00720 ANIA_00776 ANIA_00794 ANIA_00807 ANIA_00843 ANIA_00872 ANIA_00907 ANIA_00936 ANIA_00974 ANIA_01013 ANIA_01080 ANI…
3.47766e-29	687	1378	1.39482	Macromolecule biosynthetic process	http://amigo.geneontology.org/amigo/term/GO:0009059	ANIA_00049 ANIA_00083 ANIA_00086 ANIA_00104 ANIA_00105 ANIA_00116 ANIA_00123 ANIA_00127 ANIA_00134 ANIA_00138 ANIA_00142 ANIA_00192 ANIA_00228 ANIA_00260 ANIA_00262 ANIA_00265 ANIA_00278 ANIA_00279 ANIA_00291 ANIA_00292 ANIA_00312 ANIA_00315 ANIA_00321 ANIA_00327 ANIA_00333 ANIA_00359 ANIA_00364 ANIA_00367 ANIA_00388 ANIA_00406 ANIA_00407 ANIA_00422 ANIA_00428 ANIA_00433 ANIA_00434 ANIA_00440 ANI…
5.00661e-29	670	1340	1.40046	RNA metabolic process	http://amigo.geneontology.org/amigo/term/GO:0016070	ANIA_00062 ANIA_00072 ANIA_00074 ANIA_00083 ANIA_00092 ANIA_00109 ANIA_00111 ANIA_00114 ANIA_00124 ANIA_00128 ANIA_00130 ANIA_00133 ANIA_00134 ANIA_00138 ANIA_00141 ANIA_00161 ANIA_00189 ANIA_00190 ANIA_00192 ANIA_00204 ANIA_00211 ANIA_00237 ANIA_00242 ANIA_00247 ANIA_00258 ANIA_00260 ANIA_00279 ANIA_00282 ANIA_00291 ANIA_00292 ANIA_00305 ANIA_00312 ANIA_00321 ANIA_00327 ANIA_00333 ANIA_00364 ANI…
7.31876e-29	677	1357	1.39607	Cellular macromolecule biosynthetic process	http://amigo.geneontology.org/amigo/term/GO:0034645	ANIA_00049 ANIA_00083 ANIA_00086 ANIA_00104 ANIA_00105 ANIA_00116 ANIA_00123 ANIA_00127 ANIA_00134 ANIA_00138 ANIA_00142 ANIA_00192 ANIA_00228 ANIA_00260 ANIA_00262 ANIA_00265 ANIA_00278 ANIA_00279 ANIA_00291 ANIA_00292 ANIA_00312 ANIA_00315 ANIA_00321 ANIA_00327 ANIA_00333 ANIA_00359 ANIA_00364 ANIA_00367 ANIA_00388 ANIA_00406 ANIA_00407 ANIA_00422 ANIA_00428 ANIA_00433 ANIA_00434 ANIA_00440 ANI…
1.86043e-27	473	884	1.49263	Organonitrogen compound biosynthetic process	http://amigo.geneontology.org/amigo/term/GO:1901566	ANIA_00049 ANIA_00050 ANIA_00067 ANIA_00086 ANIA_00104 ANIA_00105 ANIA_00106 ANIA_00116 ANIA_00123 ANIA_00127 ANIA_00128 ANIA_00130 ANIA_00142 ANIA_00252 ANIA_00259 ANIA_00262 ANIA_00265 ANIA_00271 ANIA_00278 ANIA_00292 ANIA_00312 ANIA_00315 ANIA_00357 ANIA_00359 ANIA_00367 ANIA_00406 ANIA_00428 ANIA_00433 ANIA_00445 ANIA_00465 ANIA_00474 ANIA_00476 ANIA_00490 ANIA_00502 ANIA_00551 ANIA_00554 ANI…
2.00077e-27	675	1372	1.38471	Nucleic acid binding	http://amigo.geneontology.org/amigo/term/GO:0003676	ANIA_00044 ANIA_00062 ANIA_00072 ANIA_00105 ANIA_00109 ANIA_00116 ANIA_00123 ANIA_00126 ANIA_00133 ANIA_00138 ANIA_00142 ANIA_00153 ANIA_00162 ANIA_00189 ANIA_00190 ANIA_00204 ANIA_00211 ANIA_00228 ANIA_00242 ANIA_00247 ANIA_00260 ANIA_00262 ANIA_00279 ANIA_00282 ANIA_00292 ANIA_00305 ANIA_00312 ANIA_00321 ANIA_00333 ANIA_00359 ANIA_00364 ANIA_00388 ANIA_00406 ANIA_00421 ANIA_00422 ANIA_00424 ANI…
6.11311e-26	76	81	2.59076	Large ribosomal subunit	http://amigo.geneontology.org/amigo/term/GO:0015934	ANIA_00116 ANIA_00123 ANIA_00262 ANIA_00278 ANIA_00433 ANIA_00445 ANIA_00476 ANIA_00570 ANIA_00776 ANIA_01013 ANIA_01095 ANIA_01122 ANIA_01166 ANIA_01228 ANIA_01348 ANIA_01393 ANIA_01636 ANIA_01770 ANIA_02057 ANIA_02268 ANIA_02275 ANIA_02301 ANIA_02734 ANIA_02906 ANIA_02949 ANIA_02980 ANIA_03458 ANIA_03595 ANIA_03635 ANIA_03649 ANIA_04202 ANIA_04222 ANIA_04308 ANIA_04475 ANIA_04494 ANIA_04522 ANI…
1.3686e-24	75	82	2.55667	Ribosomal small subunit biogenesis	http://amigo.geneontology.org/amigo/term/GO:0042274	ANIA_00124 ANIA_00247 ANIA_00305 ANIA_00421 ANIA_00465 ANIA_00475 ANIA_00796 ANIA_00843 ANIA_00944 ANIA_01164 ANIA_01319 ANIA_01354 ANIA_01434 ANIA_01533 ANIA_01964 ANIA_02077 ANIA_02079 ANIA_02147 ANIA_02262 ANIA_02292 ANIA_02759 ANIA_03056 ANIA_03167 ANIA_03172 ANIA_03313 ANIA_03652 ANIA_03706 ANIA_03745 ANIA_03794 ANIA_03823 ANIA_03938 ANIA_04060 ANIA_04065 ANIA_04226 ANIA_04298 ANIA_04460 ANI…
2.19379e-24	576	1141	1.40005	Cellular protein metabolic process	http://amigo.geneontology.org/amigo/term/GO:0044267	ANIA_00038 ANIA_00044 ANIA_00049 ANIA_00065 ANIA_00083 ANIA_00084 ANIA_00086 ANIA_00103 ANIA_00104 ANIA_00105 ANIA_00106 ANIA_00116 ANIA_00123 ANIA_00124 ANIA_00127 ANIA_00134 ANIA_00138 ANIA_00142 ANIA_00173 ANIA_00262 ANIA_00265 ANIA_00278 ANIA_00288 ANIA_00292 ANIA_00312 ANIA_00315 ANIA_00327 ANIA_00359 ANIA_00367 ANIA_00380 ANIA_00406 ANIA_00428 ANIA_00433 ANIA_00440 ANIA_00445 ANIA_00465 ANI…
7.10921e-24	85	97	2.41961	Cytosolic ribosome	http://amigo.geneontology.org/amigo/term/GO:0022626	ANIA_00262 ANIA_00278 ANIA_00433 ANIA_00445 ANIA_00465 ANIA_00570 ANIA_00776 ANIA_00843 ANIA_00907 ANIA_01013 ANIA_01122 ANIA_01166 ANIA_01228 ANIA_01256 ANIA_01328 ANIA_01345 ANIA_01964 ANIA_02246 ANIA_02268 ANIA_02275 ANIA_02301 ANIA_02734 ANIA_02775 ANIA_02980 ANIA_03096 ANIA_03172 ANIA_03413 ANIA_03706 ANIA_03823 ANIA_04060 ANIA_04073 ANIA_04087 ANIA_04163 ANIA_04202 ANIA_04222 ANIA_04475 ANI…
2.01922e-23	82	93	2.43461	Preribosome	http://amigo.geneontology.org/amigo/term/GO:0030684	ANIA_00074 ANIA_00092 ANIA_00124 ANIA_00247 ANIA_00305 ANIA_00421 ANIA_00475 ANIA_00647 ANIA_00745 ANIA_00796 ANIA_00946 ANIA_01164 ANIA_01175 ANIA_01272 ANIA_01319 ANIA_01354 ANIA_01367 ANIA_01434 ANIA_01533 ANIA_02077 ANIA_02147 ANIA_02262 ANIA_02759 ANIA_02926 ANIA_03038 ANIA_03167 ANIA_03172 ANIA_03313 ANIA_03413 ANIA_03745 ANIA_03794 ANIA_03827 ANIA_03938 ANIA_04065 ANIA_04087 ANIA_04226 ANI…
4.32786e-23	631	1286	1.36332	Protein metabolic process	http://amigo.geneontology.org/amigo/term/GO:0019538	ANIA_00038 ANIA_00044 ANIA_00049 ANIA_00065 ANIA_00083 ANIA_00084 ANIA_00086 ANIA_00103 ANIA_00104 ANIA_00105 ANIA_00106 ANIA_00116 ANIA_00123 ANIA_00124 ANIA_00127 ANIA_00134 ANIA_00138 ANIA_00139 ANIA_00142 ANIA_00173 ANIA_00224 ANIA_00262 ANIA_00265 ANIA_00278 ANIA_00288 ANIA_00292 ANIA_00312 ANIA_00315 ANIA_00327 ANIA_00359 ANIA_00367 ANIA_00380 ANIA_00406 ANIA_00428 ANIA_00433 ANIA_00440 ANI…
1.77742e-22	685	1431	1.33764	Cellular nitrogen compound biosynthetic process	http://amigo.geneontology.org/amigo/term/GO:0044271	ANIA_00067 ANIA_00083 ANIA_00105 ANIA_00106 ANIA_00116 ANIA_00123 ANIA_00134 ANIA_00138 ANIA_00142 ANIA_00192 ANIA_00252 ANIA_00259 ANIA_00260 ANIA_00262 ANIA_00271 ANIA_00278 ANIA_00279 ANIA_00291 ANIA_00292 ANIA_00312 ANIA_00321 ANIA_00327 ANIA_00333 ANIA_00357 ANIA_00359 ANIA_00364 ANIA_00388 ANIA_00406 ANIA_00407 ANIA_00422 ANIA_00428 ANIA_00433 ANIA_00434 ANIA_00440 ANIA_00445 ANIA_00465 ANI…
9.81724e-22	61	64	2.63177	Maturation of SSU-rRNA	http://amigo.geneontology.org/amigo/term/GO:0030490	ANIA_00124 ANIA_00247 ANIA_00305 ANIA_00421 ANIA_00465 ANIA_00475 ANIA_00944 ANIA_01164 ANIA_01319 ANIA_01354 ANIA_01434 ANIA_01533 ANIA_02077 ANIA_02079 ANIA_02147 ANIA_02292 ANIA_02759 ANIA_03056 ANIA_03167 ANIA_03172 ANIA_03313 ANIA_03652 ANIA_03745 ANIA_03794 ANIA_03823 ANIA_03938 ANIA_04065 ANIA_04226 ANIA_04298 ANIA_04460 ANIA_04534 ANIA_04594 ANIA_05010 ANIA_05340 ANIA_05455 ANIA_05711 ANI…
9.81724e-22	61	66	2.63177	Ribosome	http://www.genome.jp/kegg-bin/show_pathway?ani03010	ANIA_00123 ANIA_00142 ANIA_00445 ANIA_00465 ANIA_00570 ANIA_00776 ANIA_00907 ANIA_01013 ANIA_01095 ANIA_01228 ANIA_01345 ANIA_01348 ANIA_01393 ANIA_01770 ANIA_01964 ANIA_02057 ANIA_02734 ANIA_02980 ANIA_03172 ANIA_03413 ANIA_03823 ANIA_04060 ANIA_04073 ANIA_04087 ANIA_04202 ANIA_04222 ANIA_04308 ANIA_04452 ANIA_04475 ANIA_04522 ANIA_04560 ANIA_04594 ANIA_04777 ANIA_04802 ANIA_04803 ANIA_04872 ANI…
9.84958e-18	49	51	2.65292	Maturation of SSU-rRNA from tricistronic rRNA transcript (SSU-rRNA, 5.8S rRNA, LSU-rRNA)	http://amigo.geneontology.org/amigo/term/GO:0000462	ANIA_00124 ANIA_00421 ANIA_00465 ANIA_01164 ANIA_01319 ANIA_01354 ANIA_01533 ANIA_02077 ANIA_02079 ANIA_02147 ANIA_02292 ANIA_02759 ANIA_03167 ANIA_03172 ANIA_03313 ANIA_03652 ANIA_03745 ANIA_03794 ANIA_03823 ANIA_03938 ANIA_04065 ANIA_04226 ANIA_04460 ANIA_04534 ANIA_04594 ANIA_05010 ANIA_05340 ANIA_05455 ANIA_05785 ANIA_05789 ANIA_05875 ANIA_05960 ANIA_06085 ANIA_06200 ANIA_06265 ANIA_06266 ANI…
9.84958e-18	60	67	2.47272	Ribosomal large subunit biogenesis	http://amigo.geneontology.org/amigo/term/GO:0042273	ANIA_00074 ANIA_00092 ANIA_00116 ANIA_00237 ANIA_00262 ANIA_00448 ANIA_00570 ANIA_00695 ANIA_00707 ANIA_00844 ANIA_00946 ANIA_01013 ANIA_01122 ANIA_01166 ANIA_01228 ANIA_01256 ANIA_01319 ANIA_01367 ANIA_01949 ANIA_02268 ANIA_02693 ANIA_02734 ANIA_02926 ANIA_02980 ANIA_03745 ANIA_03827 ANIA_04232 ANIA_04346 ANIA_04469 ANIA_04475 ANIA_04560 ANIA_04599 ANIA_05177 ANIA_05520 ANIA_05702 ANIA_05865 ANI…
4.63422e-17	161	255	1.75021	Chromosome	http://amigo.geneontology.org/amigo/term/GO:0005694	ANIA_00038 ANIA_00044 ANIA_00083 ANIA_00126 ANIA_00143 ANIA_00153 ANIA_00166 ANIA_00260 ANIA_00276 ANIA_00327 ANIA_00582 ANIA_00733 ANIA_00734 ANIA_00872 ANIA_01011 ANIA_01170 ANIA_01207 ANIA_01208 ANIA_01217 ANIA_01226 ANIA_01255 ANIA_01286 ANIA_01392 ANIA_01399 ANIA_01435 ANIA_01546 ANIA_01660 ANIA_01690 ANIA_01859 ANIA_01905 ANIA_01906 ANIA_01929 ANIA_01976 ANIA_01977 ANIA_02087 ANIA_02088 ANI…
6.49769e-16	223	392	1.57884	Cell cycle	http://amigo.geneontology.org/amigo/term/GO:0007049	ANIA_00038 ANIA_00055 ANIA_00084 ANIA_00118 ANIA_00143 ANIA_00153 ANIA_00162 ANIA_00166 ANIA_00228 ANIA_00276 ANIA_00279 ANIA_00316 ANIA_00414 ANIA_00420 ANIA_00676 ANIA_00699 ANIA_00715 ANIA_00807 ANIA_00808 ANIA_00848 ANIA_00872 ANIA_00905 ANIA_00995 ANIA_01005 ANIA_01182 ANIA_01207 ANIA_01222 ANIA_01223 ANIA_01286 ANIA_01359 ANIA_01392 ANIA_01394 ANIA_01399 ANIA_01424 ANIA_01435 ANIA_01485 ANI…
1.41955e-15	538	1139	1.32047	Cellular component organization	http://amigo.geneontology.org/amigo/term/GO:0016043	ANIA_00038 ANIA_00043 ANIA_00083 ANIA_00084 ANIA_00106 ANIA_00108 ANIA_00111 ANIA_00116 ANIA_00118 ANIA_00127 ANIA_00133 ANIA_00143 ANIA_00153 ANIA_00162 ANIA_00228 ANIA_00244 ANIA_00261 ANIA_00262 ANIA_00316 ANIA_00327 ANIA_00359 ANIA_00414 ANIA_00421 ANIA_00424 ANIA_00429 ANIA_00434 ANIA_00439 ANIA_00448 ANIA_00558 ANIA_00559 ANIA_00594 ANIA_00643 ANIA_00657 ANIA_00664 ANIA_00667 ANIA_00676 ANI…
1.8466e-15	46	49	2.59215	Cytosolic large ribosomal subunit	http://amigo.geneontology.org/amigo/term/GO:0022625	ANIA_00262 ANIA_00278 ANIA_00433 ANIA_00445 ANIA_00570 ANIA_00776 ANIA_01013 ANIA_01122 ANIA_01166 ANIA_01228 ANIA_02268 ANIA_02275 ANIA_02301 ANIA_02734 ANIA_02980 ANIA_04202 ANIA_04222 ANIA_04475 ANIA_04494 ANIA_04522 ANIA_04560 ANIA_04787 ANIA_04802 ANIA_05014 ANIA_05520 ANIA_05702 ANIA_05719 ANIA_05800 ANIA_05996 ANIA_06082 ANIA_06181 ANIA_06202 ANIA_06500 ANIA_06629 ANIA_07003 ANIA_07107 ANI…
2.20849e-15	157	255	1.71348	Chromosome organization	http://amigo.geneontology.org/amigo/term/GO:0051276	ANIA_00038 ANIA_00083 ANIA_00143 ANIA_00153 ANIA_00162 ANIA_00228 ANIA_00327 ANIA_00424 ANIA_00434 ANIA_00676 ANIA_00733 ANIA_00734 ANIA_00848 ANIA_00905 ANIA_01060 ANIA_01182 ANIA_01190 ANIA_01223 ANIA_01226 ANIA_01255 ANIA_01286 ANIA_01379 ANIA_01560 ANIA_01660 ANIA_01708 ANIA_01729 ANIA_01859 ANIA_01906 ANIA_01976 ANIA_02087 ANIA_02088 ANIA_02095 ANIA_02128 ANIA_02141 ANIA_02143 ANIA_02160 ANI…
1.41833e-14	46	50	2.54031	Organellar ribosome	http://amigo.geneontology.org/amigo/term/GO:0000313	ANIA_00116 ANIA_00123 ANIA_00142 ANIA_00476 ANIA_01095 ANIA_01348 ANIA_01393 ANIA_01636 ANIA_01770 ANIA_01954 ANIA_02057 ANIA_02906 ANIA_02949 ANIA_03173 ANIA_03458 ANIA_03595 ANIA_03635 ANIA_03649 ANIA_03744 ANIA_04251 ANIA_04308 ANIA_04434 ANIA_04613 ANIA_04652 ANIA_04730 ANIA_05164 ANIA_05203 ANIA_05897 ANIA_06039 ANIA_06146 ANIA_06302 ANIA_06376 ANIA_06564 ANIA_06891 ANIA_06904 ANIA_07449 ANI…
1.41833e-14	46	50	2.54031	Mitochondrial ribosome	http://amigo.geneontology.org/amigo/term/GO:0005761	ANIA_00116 ANIA_00123 ANIA_00142 ANIA_00476 ANIA_01095 ANIA_01348 ANIA_01393 ANIA_01636 ANIA_01770 ANIA_01954 ANIA_02057 ANIA_02906 ANIA_02949 ANIA_03173 ANIA_03458 ANIA_03595 ANIA_03635 ANIA_03649 ANIA_03744 ANIA_04251 ANIA_04308 ANIA_04434 ANIA_04613 ANIA_04652 ANIA_04730 ANIA_05164 ANIA_05203 ANIA_05897 ANIA_06039 ANIA_06146 ANIA_06302 ANIA_06376 ANIA_06564 ANIA_06891 ANIA_06904 ANIA_07449 ANI…
1.49751e-14	293	562	1.45772	Cellular localization	http://amigo.geneontology.org/amigo/term/GO:0051641	ANIA_00063 ANIA_00068 ANIA_00084 ANIA_00118 ANIA_00124 ANIA_00127 ANIA_00143 ANIA_00162 ANIA_00244 ANIA_00261 ANIA_00268 ANIA_00282 ANIA_00316 ANIA_00357 ANIA_00417 ANIA_00420 ANIA_00429 ANIA_00434 ANIA_00462 ANIA_00559 ANIA_00576 ANIA_00607 ANIA_00634 ANIA_00643 ANIA_00665 ANIA_00706 ANIA_00747 ANIA_00753 ANIA_00777 ANIA_00821 ANIA_00834 ANIA_00843 ANIA_00844 ANIA_00846 ANIA_00848 ANIA_00901 ANI…
2.97161e-14	390	792	1.37531	Organelle organization	http://amigo.geneontology.org/amigo/term/GO:0006996	ANIA_00038 ANIA_00043 ANIA_00083 ANIA_00084 ANIA_00108 ANIA_00116 ANIA_00118 ANIA_00127 ANIA_00143 ANIA_00153 ANIA_00162 ANIA_00228 ANIA_00244 ANIA_00261 ANIA_00262 ANIA_00316 ANIA_00327 ANIA_00414 ANIA_00421 ANIA_00424 ANIA_00429 ANIA_00434 ANIA_00439 ANIA_00559 ANIA_00594 ANIA_00657 ANIA_00664 ANIA_00676 ANIA_00706 ANIA_00715 ANIA_00733 ANIA_00734 ANIA_00747 ANIA_00808 ANIA_00821 ANIA_00843 ANI…
3.01367e-14	182	313	1.61588	Cell cycle process	http://amigo.geneontology.org/amigo/term/GO:0022402	ANIA_00038 ANIA_00055 ANIA_00084 ANIA_00118 ANIA_00143 ANIA_00162 ANIA_00228 ANIA_00414 ANIA_00420 ANIA_00676 ANIA_00715 ANIA_00807 ANIA_00808 ANIA_00848 ANIA_00872 ANIA_00905 ANIA_01005 ANIA_01182 ANIA_01207 ANIA_01222 ANIA_01223 ANIA_01286 ANIA_01359 ANIA_01394 ANIA_01424 ANIA_01435 ANIA_01560 ANIA_01661 ANIA_01708 ANIA_01779 ANIA_01967 ANIA_02047 ANIA_02059 ANIA_02088 ANIA_02128 ANIA_02137 ANI…
6.83762e-14	212	389	1.54861	Catalytic activity, acting on a nucleic acid	http://amigo.geneontology.org/amigo/term/GO:0140640	ANIA_00044 ANIA_00076 ANIA_00083 ANIA_00092 ANIA_00128 ANIA_00130 ANIA_00133 ANIA_00141 ANIA_00189 ANIA_00190 ANIA_00192 ANIA_00204 ANIA_00228 ANIA_00260 ANIA_00321 ANIA_00327 ANIA_00424 ANIA_00428 ANIA_00502 ANIA_00583 ANIA_00589 ANIA_00625 ANIA_00637 ANIA_00707 ANIA_00745 ANIA_00752 ANIA_00757 ANIA_00818 ANIA_00872 ANIA_00894 ANIA_00936 ANIA_00944 ANIA_00956 ANIA_00997 ANIA_01158 ANIA_01201 ANI…
8.16662e-14	76	104	2.07774	Nuclear transport	http://amigo.geneontology.org/amigo/term/GO:0051169	ANIA_00084 ANIA_00124 ANIA_00282 ANIA_00434 ANIA_00843 ANIA_00844 ANIA_00906 ANIA_00926 ANIA_01064 ANIA_01157 ANIA_01190 ANIA_01223 ANIA_01238 ANIA_01256 ANIA_01326 ANIA_01379 ANIA_01711 ANIA_02086 ANIA_02120 ANIA_02142 ANIA_02164 ANIA_02210 ANIA_02226 ANIA_02262 ANIA_02271 ANIA_02431 ANIA_03012 ANIA_03172 ANIA_03413 ANIA_03454 ANIA_03651 ANIA_03657 ANIA_03739 ANIA_03745 ANIA_03864 ANIA_04087 ANI…
8.16662e-14	76	104	2.07774	Nucleocytoplasmic transport	http://amigo.geneontology.org/amigo/term/GO:0006913	ANIA_00084 ANIA_00124 ANIA_00282 ANIA_00434 ANIA_00843 ANIA_00844 ANIA_00906 ANIA_00926 ANIA_01064 ANIA_01157 ANIA_01190 ANIA_01223 ANIA_01238 ANIA_01256 ANIA_01326 ANIA_01379 ANIA_01711 ANIA_02086 ANIA_02120 ANIA_02142 ANIA_02164 ANIA_02210 ANIA_02226 ANIA_02262 ANIA_02271 ANIA_02431 ANIA_03012 ANIA_03172 ANIA_03413 ANIA_03454 ANIA_03651 ANIA_03657 ANIA_03739 ANIA_03745 ANIA_03864 ANIA_04087 ANI…
9.7456e-14	53	62	2.36039	Small ribosomal subunit	http://amigo.geneontology.org/amigo/term/GO:0015935	ANIA_00142 ANIA_00465 ANIA_00843 ANIA_00907 ANIA_01345 ANIA_01954 ANIA_01964 ANIA_02775 ANIA_03096 ANIA_03172 ANIA_03173 ANIA_03413 ANIA_03706 ANIA_03744 ANIA_03823 ANIA_04060 ANIA_04073 ANIA_04087 ANIA_04163 ANIA_04251 ANIA_04434 ANIA_04468 ANIA_04594 ANIA_04613 ANIA_04730 ANIA_04777 ANIA_04794 ANIA_04803 ANIA_04916 ANIA_05164 ANIA_05203 ANIA_05222 ANIA_05441 ANIA_05522 ANIA_05715 ANIA_05960 ANI…
1.27002e-13	140	233	1.71048	Catalytic activity, acting on RNA	http://amigo.geneontology.org/amigo/term/GO:0140098	ANIA_00092 ANIA_00128 ANIA_00130 ANIA_00141 ANIA_00189 ANIA_00190 ANIA_00192 ANIA_00204 ANIA_00228 ANIA_00260 ANIA_00321 ANIA_00428 ANIA_00502 ANIA_00583 ANIA_00589 ANIA_00625 ANIA_00637 ANIA_00707 ANIA_00745 ANIA_00752 ANIA_00757 ANIA_00818 ANIA_00894 ANIA_00936 ANIA_00944 ANIA_00956 ANIA_00997 ANIA_01158 ANIA_01201 ANIA_01447 ANIA_01474 ANIA_01486 ANIA_01521 ANIA_01634 ANIA_01709 ANIA_01710 ANI…
1.35356e-13	397	809	1.36005	Macromolecule modification	http://amigo.geneontology.org/amigo/term/GO:0043412	ANIA_00038 ANIA_00044 ANIA_00049 ANIA_00062 ANIA_00065 ANIA_00072 ANIA_00083 ANIA_00086 ANIA_00092 ANIA_00103 ANIA_00104 ANIA_00106 ANIA_00124 ANIA_00127 ANIA_00128 ANIA_00130 ANIA_00134 ANIA_00138 ANIA_00141 ANIA_00173 ANIA_00247 ANIA_00265 ANIA_00288 ANIA_00292 ANIA_00315 ANIA_00327 ANIA_00367 ANIA_00380 ANIA_00440 ANIA_00502 ANIA_00551 ANIA_00576 ANIA_00625 ANIA_00636 ANIA_00667 ANIA_00668 ANI…
2.36655e-13	83	115	1.99287	Ribonucleoprotein complex subunit organization	http://amigo.geneontology.org/amigo/term/GO:0071826	ANIA_00111 ANIA_00116 ANIA_00133 ANIA_00262 ANIA_00327 ANIA_00359 ANIA_00421 ANIA_00448 ANIA_00728 ANIA_00843 ANIA_01013 ANIA_01166 ANIA_01270 ANIA_01448 ANIA_01495 ANIA_01635 ANIA_01802 ANIA_01951 ANIA_02007 ANIA_02105 ANIA_02268 ANIA_02420 ANIA_02693 ANIA_02734 ANIA_02743 ANIA_02907 ANIA_02997 ANIA_03055 ANIA_03156 ANIA_03172 ANIA_03411 ANIA_03427 ANIA_03706 ANIA_04060 ANIA_04232 ANIA_04259 ANI…
3.48162e-13	487	1048	1.30935	Protein binding	http://amigo.geneontology.org/amigo/term/GO:0005515	ANIA_00038 ANIA_00065 ANIA_00067 ANIA_00081 ANIA_00083 ANIA_00108 ANIA_00111 ANIA_00118 ANIA_00127 ANIA_00128 ANIA_00132 ANIA_00153 ANIA_00203 ANIA_00211 ANIA_00214 ANIA_00219 ANIA_00244 ANIA_00249 ANIA_00265 ANIA_00288 ANIA_00292 ANIA_00302 ANIA_00305 ANIA_00310 ANIA_00312 ANIA_00359 ANIA_00380 ANIA_00381 ANIA_00396 ANIA_00406 ANIA_00407 ANIA_00409 ANIA_00414 ANIA_00420 ANIA_00435 ANIA_00442 ANI…
8.29997e-13	80	111	1.99006	Ribonucleoprotein complex assembly	http://amigo.geneontology.org/amigo/term/GO:0022618	ANIA_00111 ANIA_00116 ANIA_00262 ANIA_00327 ANIA_00359 ANIA_00421 ANIA_00448 ANIA_00728 ANIA_00843 ANIA_01013 ANIA_01166 ANIA_01270 ANIA_01448 ANIA_01495 ANIA_01635 ANIA_01802 ANIA_01951 ANIA_02007 ANIA_02105 ANIA_02268 ANIA_02420 ANIA_02693 ANIA_02734 ANIA_02743 ANIA_02907 ANIA_02997 ANIA_03055 ANIA_03156 ANIA_03172 ANIA_03411 ANIA_03427 ANIA_03706 ANIA_04060 ANIA_04232 ANIA_04259 ANIA_04470 ANI…
1.21261e-12	145	245	1.66131	Carbohydrate derivative biosynthetic process	http://amigo.geneontology.org/amigo/term/GO:1901137	ANIA_00049 ANIA_00067 ANIA_00086 ANIA_00104 ANIA_00128 ANIA_00130 ANIA_00252 ANIA_00259 ANIA_00265 ANIA_00271 ANIA_00315 ANIA_00357 ANIA_00367 ANIA_00474 ANIA_00490 ANIA_00502 ANIA_00551 ANIA_00565 ANIA_00626 ANIA_00636 ANIA_00667 ANIA_00743 ANIA_00787 ANIA_00943 ANIA_01455 ANIA_01459 ANIA_01523 ANIA_01534 ANIA_01555 ANIA_01624 ANIA_01683 ANIA_01721 ANIA_01767 ANIA_01775 ANIA_01911 ANIA_01965 ANI…
1.29486e-12	236	446	1.48101	Establishment of localization in cell	http://amigo.geneontology.org/amigo/term/GO:0051649	ANIA_00063 ANIA_00068 ANIA_00084 ANIA_00118 ANIA_00124 ANIA_00143 ANIA_00162 ANIA_00244 ANIA_00261 ANIA_00282 ANIA_00316 ANIA_00357 ANIA_00417 ANIA_00420 ANIA_00429 ANIA_00434 ANIA_00559 ANIA_00576 ANIA_00634 ANIA_00643 ANIA_00665 ANIA_00706 ANIA_00747 ANIA_00777 ANIA_00821 ANIA_00834 ANIA_00843 ANIA_00844 ANIA_00901 ANIA_00906 ANIA_00922 ANIA_00926 ANIA_01064 ANIA_01105 ANIA_01126 ANIA_01154 ANI…
1.33984e-12	56	71	2.24098	Cytoplasmic translation	http://amigo.geneontology.org/amigo/term/GO:0002181	ANIA_00278 ANIA_00359 ANIA_00445 ANIA_00570 ANIA_00720 ANIA_00776 ANIA_01166 ANIA_01270 ANIA_01751 ANIA_02080 ANIA_02244 ANIA_02275 ANIA_02734 ANIA_02743 ANIA_02907 ANIA_02932 ANIA_02980 ANIA_02997 ANIA_03055 ANIA_03156 ANIA_03172 ANIA_03411 ANIA_03427 ANIA_04080 ANIA_04087 ANIA_04259 ANIA_04470 ANIA_04594 ANIA_04616 ANIA_04916 ANIA_04937 ANIA_05014 ANIA_05111 ANIA_05179 ANIA_05719 ANIA_05745 ANI…
1.358e-12	97	147	1.85998	TRNA metabolic process	http://amigo.geneontology.org/amigo/term/GO:0006399	ANIA_00062 ANIA_00072 ANIA_00114 ANIA_00128 ANIA_00130 ANIA_00141 ANIA_00161 ANIA_00189 ANIA_00190 ANIA_00247 ANIA_00428 ANIA_00502 ANIA_00745 ANIA_00757 ANIA_00804 ANIA_00818 ANIA_00936 ANIA_00956 ANIA_01201 ANIA_01486 ANIA_01495 ANIA_01709 ANIA_01710 ANIA_01751 ANIA_01802 ANIA_01913 ANIA_02007 ANIA_02105 ANIA_02190 ANIA_02252 ANIA_02294 ANIA_02437 ANIA_02451 ANIA_02499 ANIA_02513 ANIA_02735 ANI…
1.43825e-12	99	148	1.84702	Mitochondrial protein-containing complex	http://amigo.geneontology.org/amigo/term/GO:0098798	ANIA_00116 ANIA_00123 ANIA_00142 ANIA_00252 ANIA_00357 ANIA_00429 ANIA_00476 ANIA_00559 ANIA_00657 ANIA_00747 ANIA_00821 ANIA_00896 ANIA_00943 ANIA_01063 ANIA_01095 ANIA_01105 ANIA_01348 ANIA_01393 ANIA_01534 ANIA_01624 ANIA_01636 ANIA_01726 ANIA_01770 ANIA_01892 ANIA_01954 ANIA_02057 ANIA_02306 ANIA_02315 ANIA_02316 ANIA_02906 ANIA_02916 ANIA_02949 ANIA_02964 ANIA_03173 ANIA_03458 ANIA_03467 ANI…
3.23018e-12	72	98	2.02864	RNA modification	http://amigo.geneontology.org/amigo/term/GO:0009451	ANIA_00062 ANIA_00072 ANIA_00092 ANIA_00128 ANIA_00130 ANIA_00141 ANIA_00247 ANIA_00502 ANIA_00625 ANIA_00695 ANIA_00728 ANIA_00745 ANIA_00757 ANIA_00804 ANIA_00818 ANIA_00956 ANIA_00984 ANIA_01351 ANIA_01751 ANIA_01957 ANIA_02190 ANIA_02294 ANIA_02451 ANIA_02499 ANIA_02735 ANIA_02759 ANIA_03010 ANIA_03038 ANIA_03167 ANIA_03170 ANIA_03313 ANIA_03603 ANIA_04093 ANIA_04786 ANIA_04889 ANIA_04994 ANI…
4.55274e-12	64	84	2.10378	Macromolecule methylation	http://amigo.geneontology.org/amigo/term/GO:0043414	ANIA_00065 ANIA_00092 ANIA_00128 ANIA_00130 ANIA_00134 ANIA_00141 ANIA_00288 ANIA_00625 ANIA_00745 ANIA_00757 ANIA_01170 ANIA_01445 ANIA_01751 ANIA_01905 ANIA_01957 ANIA_02104 ANIA_02190 ANIA_02557 ANIA_02735 ANIA_02759 ANIA_03010 ANIA_03038 ANIA_03096 ANIA_03313 ANIA_03603 ANIA_03926 ANIA_04543 ANIA_04764 ANIA_05630 ANIA_05789 ANIA_05795 ANIA_05871 ANIA_05998 ANIA_06013 ANIA_06041 ANIA_06072 ANI…
5.58138e-12	35	37	2.61195	Virion component	http://amigo.geneontology.org/amigo/term/GO:0044423	ANIA_00109 ANIA_00305 ANIA_00475 ANIA_00647 ANIA_00695 ANIA_00727 ANIA_01119 ANIA_01495 ANIA_01802 ANIA_01983 ANIA_02007 ANIA_02105 ANIA_03794 ANIA_04226 ANIA_04298 ANIA_04456 ANIA_04460 ANIA_04648 ANIA_05340 ANIA_05679 ANIA_05779 ANIA_06171 ANIA_06199 ANIA_06265 ANIA_06676 ANIA_06735 ANIA_06903 ANIA_07182 ANIA_07458 ANIA_08183 ANIA_10007 ANIA_10561 ANIA_10848 ANIA_10941 ANIA_10966
1.25681e-11	216	408	1.48363	Intracellular transport	http://amigo.geneontology.org/amigo/term/GO:0046907	ANIA_00063 ANIA_00068 ANIA_00084 ANIA_00118 ANIA_00124 ANIA_00244 ANIA_00261 ANIA_00282 ANIA_00316 ANIA_00357 ANIA_00417 ANIA_00420 ANIA_00429 ANIA_00434 ANIA_00559 ANIA_00576 ANIA_00634 ANIA_00643 ANIA_00665 ANIA_00706 ANIA_00747 ANIA_00777 ANIA_00821 ANIA_00834 ANIA_00843 ANIA_00844 ANIA_00906 ANIA_00922 ANIA_00926 ANIA_01064 ANIA_01105 ANIA_01126 ANIA_01154 ANIA_01157 ANIA_01177 ANIA_01182 ANI…
1.39521e-11	34	36	2.60781	Viral nucleocapsid	http://amigo.geneontology.org/amigo/term/GO:0019013	ANIA_00109 ANIA_00305 ANIA_00475 ANIA_00647 ANIA_00695 ANIA_00727 ANIA_01119 ANIA_01495 ANIA_01802 ANIA_01983 ANIA_02007 ANIA_02105 ANIA_03794 ANIA_04226 ANIA_04298 ANIA_04456 ANIA_04460 ANIA_04648 ANIA_05340 ANIA_05679 ANIA_05779 ANIA_06171 ANIA_06199 ANIA_06265 ANIA_06676 ANIA_06735 ANIA_06903 ANIA_07458 ANIA_08183 ANIA_10007 ANIA_10561 ANIA_10848 ANIA_10941 ANIA_10966
1.39521e-11	34	36	2.60781	Viral capsid	http://amigo.geneontology.org/amigo/term/GO:0019028	ANIA_00109 ANIA_00305 ANIA_00475 ANIA_00647 ANIA_00695 ANIA_00727 ANIA_01119 ANIA_01495 ANIA_01802 ANIA_01983 ANIA_02007 ANIA_02105 ANIA_03794 ANIA_04226 ANIA_04298 ANIA_04456 ANIA_04460 ANIA_04648 ANIA_05340 ANIA_05679 ANIA_05779 ANIA_06171 ANIA_06199 ANIA_06265 ANIA_06676 ANIA_06735 ANIA_06903 ANIA_07458 ANIA_08183 ANIA_10007 ANIA_10561 ANIA_10848 ANIA_10941 ANIA_10966
1.39521e-11	34	36	2.60781	Small-subunit processome	http://amigo.geneontology.org/amigo/term/GO:0032040	ANIA_00305 ANIA_00475 ANIA_00647 ANIA_00745 ANIA_00796 ANIA_01164 ANIA_01319 ANIA_01354 ANIA_01434 ANIA_01533 ANIA_02077 ANIA_02147 ANIA_02759 ANIA_03038 ANIA_03167 ANIA_03413 ANIA_03794 ANIA_03938 ANIA_04226 ANIA_04298 ANIA_04456 ANIA_04460 ANIA_04916 ANIA_05010 ANIA_05340 ANIA_05455 ANIA_05875 ANIA_06171 ANIA_06265 ANIA_07458 ANIA_08183 ANIA_08293 ANIA_10052 ANIA_10352
1.97153e-11	297	593	1.38996	Catalytic complex	http://amigo.geneontology.org/amigo/term/GO:1902494	ANIA_00065 ANIA_00067 ANIA_00081 ANIA_00083 ANIA_00111 ANIA_00118 ANIA_00138 ANIA_00189 ANIA_00190 ANIA_00192 ANIA_00260 ANIA_00292 ANIA_00315 ANIA_00321 ANIA_00327 ANIA_00357 ANIA_00420 ANIA_00440 ANIA_00442 ANIA_00576 ANIA_00636 ANIA_00651 ANIA_00668 ANIA_00695 ANIA_00747 ANIA_00752 ANIA_00794 ANIA_00808 ANIA_00810 ANIA_00814 ANIA_00883 ANIA_00896 ANIA_00901 ANIA_00905 ANIA_01004 ANIA_01060 ANI…
2.18075e-11	131	218	1.65926	Mitotic cell cycle	http://amigo.geneontology.org/amigo/term/GO:0000278	ANIA_00084 ANIA_00118 ANIA_00143 ANIA_00166 ANIA_00228 ANIA_00279 ANIA_00316 ANIA_00676 ANIA_00715 ANIA_00808 ANIA_00848 ANIA_00872 ANIA_00905 ANIA_01005 ANIA_01182 ANIA_01207 ANIA_01223 ANIA_01286 ANIA_01424 ANIA_01560 ANIA_01674 ANIA_01779 ANIA_02054 ANIA_02088 ANIA_02128 ANIA_02137 ANIA_02160 ANIA_02491 ANIA_02511 ANIA_02686 ANIA_02927 ANIA_02963 ANIA_02969 ANIA_03040 ANIA_03067 ANIA_03154 ANI…
[truncated: 730 more rows]

## Sheet: Sheet2
Sheet 2	A. nidulans	DsodB: MSB treated vs. untreated
Species	Type of genes	Criteria	Number of genes
[truncated: 1,553 more rows]

## Sheet: Sheet3
Sheet 3	A. nidulans	Untreated: DsodB vs. THS30.3
[truncated: 566 more rows]

[truncated: 1 more sheets: Sheet4]
