# Supplementary material for: Global Transcriptomic Changes Elicited by sodB Deletion and Menadione Exposure in Aspergillus nidulans
Source: J Fungi (Basel). 2023 Oct 30;9(11):1060. doi: 10.3390/jof9111060 (PMC10671992; doi:10.3390/jof9111060)
Supplement: Supplementary file 1 [file jof-09-01060-s001.zip › Table S4.xlsx]

## Sheet: A. nidulans
Table S4	RNAseq data of "Fe-S cluster assembly", "Antioxidant enzyme", "Respiration", and "Sterigmatocystin cluster" genes.
	"Fe-S cluster assembly", "Antioxidant enzyme", and "Respiration" gene groups were created according to the data available at FungiDB (https://fungidb.org/fungidb/app).
	Sterigmatocystin cluster genes were collected from Inglis et al. (2013) - DOI: 10.1186/1471-2180-13-91 [19]
	Enrichment of these genes in the upregulated or downregulated gene sets were tested by Fisher's exact test.
	log2FC
	< (-2)
	(-1) - (-2)
	0 - (-1)
	0 - 1
	1 -2
	> 2
	not DEG
Fe-S cluster assembly genes
GENE ID	GO Term	Product	THS30.3: MSB treated vs. untreated		DsodB: MSB treated vs. untreated		Untreated: DsodB vs. THS30.3		MSB treated: DsodBvs. THS30.3
			log2FC	p adj.	log2FC	p adj.	log2FC	p adj.	log2FC	p adj.
AN0447	protein maturation by iron-sulfur cluster transfer		2.68584	7.22e-184	2.3261	6.56e-141	0.693525	1.57e-12	0.333785	0.00064414
AN10012	iron-sulfur cluster assembly	Ortholog(s) have role in iron-sulfur cluster assembly and mitochondrial matrix localization	2.15134	2.72e-127	2.03626	2.62e-117	0.476117	9.14e-07	0.361034	0.00010165
AN10237	iron-sulfur cluster assembly	Has domain(s) with predicted iron-sulfur cluster binding, structural molecule activity and role in iron-sulfur cluster assembly	1.07958	1.79e-41	-0.156848	0.0647377	0.476007	1.95e-08	-0.760422	1.96e-20
AN10283	iron-sulfur cluster assembly		1.31185	9.68e-36	1.47921	2.95e-45	-0.0613732	0.680817	0.105987	0.389593
AN10584	iron-sulfur cluster assembly	Ortholog(s) have cysteine desulfurase activity, role in iron-sulfur cluster assembly and L-cysteine desulfurase complex, extrinsic component of mitochondrial inner membrane, mitochondrial matrix, nucleus localization	1.1443	7.74e-32	0.287347	0.00389221	1.1132	6.7e-29	0.256245	0.0148839
AN11060	iron-sulfur cluster assembly	Ortholog(s) have 4 iron, 4 sulfur cluster binding, ATPase activity, role in iron-sulfur cluster assembly, tRNA wobble uridine modification and Nbp35-Cfd1 ATPase complex, cytoplasm localization	2.43031	7.11e-91	3.32459	6.79e-167	-0.7822	1.44e-09	0.112082	0.433673
AN11837	[4Fe-4S] cluster assembly		0.95893	1.06e-15	-0.0707462	0.615223	0.460786	0.00037133	-0.56889	5.95e-06
AN12201	2 iron, 2 sulfur cluster binding	Ortholog(s) have oxidoreductase activity, acting on NAD(P)H, heme protein as acceptor activity, role in heme a biosynthetic process, iron-sulfur cluster assembly, ubiquinone biosynthetic process and mitochondrial matrix localization	1.0056	1.69e-27	0.0519104	0.630181	0.888874	7.27e-21	-0.0648114	0.567705
AN1385	protein maturation by iron-sulfur cluster transfer	Ortholog(s) have role in iron-sulfur cluster assembly, tRNA wobble uridine modification and cytosol, nucleus localization	0.911501	2.26e-20	0.861415	1.34e-18	0.221792	0.0507949	0.171706	0.118562
AN1407	protein maturation by [4Fe-4S] cluster transfer	Ortholog(s) have role in iron-sulfur cluster assembly and cytosol, nucleus localization	2.04773	1.1e-56	2.23245	1.3e-66	-0.282636	0.0670117	-0.0979145	0.526591
AN1469	[2Fe-2S] cluster assembly	Ortholog(s) have chaperone binding activity, role in aerobic respiration, iron-sulfur cluster assembly and mitochondrion localization	1.46092	2.43e-41	1.64321	8.26e-53	0.151993	0.262314	0.334282	0.00352419
AN1528	protein maturation by iron-sulfur cluster transfer		-0.857538	6.15e-14	-0.829043	6.92e-13	-0.0593894	0.700895	-0.0308946	0.84161
AN1986	iron-sulfur cluster assembly		0.485162	5.66e-07	0.858076	2.8e-19	-0.112608	0.354259	0.260306	0.0119116
AN2155	iron-sulfur cluster assembly	Ortholog(s) have 4 iron, 4 sulfur cluster binding, ATPase activity, iron ion binding activity, role in iron-sulfur cluster assembly, tRNA wobble uridine modification and Nbp35-Cfd1 ATPase complex, cytosol, nucleus localization	2.58815	4.21e-153	2.59457	3.83e-156	0.115693	0.368257	0.12211	0.2767
AN2508	iron-sulfur cluster binding	Ortholog(s) have cysteine desulfurase activity and role in cellular iron ion homeostasis, iron-sulfur cluster assembly, mitochondrial tRNA thio-modification, tRNA wobble uridine modification	1.11461	1.4e-47	1.382	9.38e-74	0.185402	0.0365724	0.452793	9.55e-09
AN3632	iron-sulfur cluster assembly	Ortholog(s) have iron-sulfur cluster binding activity, role in iron-sulfur cluster assembly and cytosol, membrane, nucleus localization	3.44334	0	3.66942	0	-0.421749	4.57e-07	-0.195677	0.0121943
AN3686	protein maturation by [4Fe-4S] cluster transfer		0.568031	6.77e-06	0.313246	0.0144173	0.43325	0.00137202	0.178465	0.211239
AN4297	iron-sulfur cluster assembly	Ortholog(s) have role in iron-sulfur cluster assembly, mitochondrial respiratory chain complex I assembly and mitochondrial respiratory chain complex I, peripheral segment, plasma membrane localization	-0.508911	1.29e-09	-0.969403	9.78e-32	0.675092	2.47e-15	0.214601	0.0185287
AN4304	protein maturation by [2Fe-2S] cluster transfer		2.25604	1.67e-92	1.93799	1.13e-69	0.710654	1.41e-09	0.392603	0.000786553
AN4655	iron-sulfur cluster assembly	Ortholog(s) have 2 iron, 2 sulfur cluster binding, ferrous iron binding, iron-sulfur transferase activity	2.53182	2.62e-276	3.24409	0	-0.0938062	0.3017	0.618458	1.51e-17
AN5528	iron-sulfur cluster assembly	Mitochondrial Fe/S cluster exporter	0.669914	2.81e-13	1.48386	6.14e-62	0.137841	0.214101	0.951784	2.42e-25
AN5953	iron-sulfur cluster assembly	Ortholog(s) have iron ion binding activity, role in biotin biosynthetic process, iron-sulfur cluster assembly and mitochondrial matrix localization	1.91979	3.54e-43	2.14526	2.51e-54	0.477291	0.00201243	0.702755	1.11e-06
AN7525	iron-sulfur cluster assembly		-1.30432	9.21e-18	-1.96576	4.11e-38	0.74061	4.87e-07	0.0791638	0.705327
AN8485	iron-sulfur cluster assembly		3.28106	0	3.01651	0	0.274774	0.00227699	0.0102226	0.925255
DEG, log2FC>0
upregulated (group):			21		18		13		11
upregulated (genome):			3763		3974		2395		3289
p			1.01e-07		0.0001212		0.0005224		0.07296
DEG, log2FC>1
upregulated (group):			16		14		1		0
upregulated (genome):			2235		2655		279		691
p			1.123e-06		0.0003531		0.4609		1
DEG, log2FC>2
upregulated (group):			9		9		0		0
upregulated (genome):			1028		1360		66		120
p			0.0001896		0.001523		1		1
DEG, log2FC<0
downregulated (group):			3		3		2		3
downregulated (genome):			3795		4046		2017		2503
p			0.9966		0.9982		0.951		0.9353
DEG, log2FC<-1
downregulated (group):			1		1		0		0
downregulated (genome):			2220		2758		529		1050
p			0.9956		0.999		1		1
DEG, log2FC<-2
downregulated (group):			0		0		0		0
downregulated (genome):			929		1292		113		269
p			1		1		1		1
Total number of genes (group):			24		24		24		24
Total number of genes (genome):			10988		10988		10988		10988
Antioxidant enzyme genes
GENE ID	Gene name	GO Term	Product	THS30.3: MSB treated vs. untreated		DsodB: MSB treated vs. untreated		Untreated: DsodB vs. THS30.3		MSB treated: DsodBvs. THS30.3
				log2FC	p adj.	log2FC	p adj.	log2FC	p adj.	log2FC	p adj.
AN5918	catC	catalase activity	Catalase C	1.6514	1.66e-23	0.208768	0.253024	0.286414	0.150224	-1.15622	1.35e-11
AN7388	cpeA/catD	catalase activity	Putative bifunctional catalase-peroxidase	-1.22718	5e-11	0.249041	0.327101	-2.19916	2.94e-29	-0.722941	0.00268394
AN8553		catalase activity	Putative catalase with a predicted role in gluconic acid and gluconate metabolism	-0.521474	0.00145626	-0.58243	0.00159599	-0.534777	0.00128441	-0.595733	0.00276547
AN8637	catA	catalase activity	Conidia-specific catalase	4.8355	1.55e-228	6.26955	0	-1.83822	2.92e-25	-0.404168	0.00917029
AN9339	catB	catalase activity	catalase B	2.63718	1.2e-72	4.71828	1.45e-229	-1.06618	3.88e-12	1.01492	1.92e-11
AN10220	ccp1	cytochrome-c peroxidase activity	Putative cytochrome c peroxidase	5.39597	0	5.3089	0	0.352219	0.00177963	0.265144	0.0163129
AN4304		glutathione disulfide oxidoreductase activity	Ortholog(s) have glutathione disulfide oxidoreductase activity, role in cellular response to oxidative stress, response to osmotic stress and mitochondrial matrix localization	2.25604	1.67e-92	1.93799	1.13e-69	0.710654	1.41e-09	0.392603	0.000786553
AN7567		glutathione disulfide oxidoreductase activity	Ortholog(s) have RNA polymerase II activating transcription factor binding, glutathione disulfide oxidoreductase activity	0.899469	3.06e-28	1.30315	1.06e-58	0.0377069	0.747246	0.441388	1.43e-07
AN4215		glutathione disulfide oxidoreductase activity	Ortholog(s) have glutathione disulfide oxidoreductase activity, glutathione peroxidase activity, glutathione transferase activity and role in glutathione metabolic process, pathogenesis, removal of superoxide radicals	1.22613	5.6e-23	1.94173	9.77e-56	-0.241785	0.0985745	0.47382	0.000291435
AN0932	glrA	glutathione-disulfide reductase (NADPH) activity	Glutathione reductase, putative	4.15263	1.75e-177	3.69664	2.36e-141	0.132335	0.49771	-0.323664	0.0455179
AN2846	gpxA	glutathione peroxidase activity	Putative glutathione peroxidase with a predicted role in glutathione biosynthesis; protein induced by farnesol	5.78058	0	6.1065	0	0.241722	0.13672	0.567645	6.07527e-05
AN3255		glutathione peroxidase activity	Predicted glutathione peroxidase	-0.197464	0.155041	0.259477	0.0804152	-1.20328	5.46e-19	-0.746341	2.15e-07
AN4905		glutathione peroxidase activity	theta class glutathione S-transferase	6.13869	0	6.02999	0	-0.390983	0.0160763	-0.499683	0.000683013
AN10379		glutathione transferase activity	Ortholog of A. fumigatus Af293 : Afu7g06460, A. niger CBS 513.88 : An03g05540, Neosartorya fischeri NRRL 181 : NFIA_027750, Aspergillus wentii : Aspwe1_0022967 and Aspergillus versicolor : Aspve1_0056237	0.83302	1.25e-10	1.75952	8.43e-42	-0.669722	1.78e-06	0.256778	0.0697355
AN5831		glutathione transferase activity	Ortholog of A. nidulans FGSC A4 : AN10273/gst3, A. fumigatus Af293 : Afu2g15770, A. niger CBS 513.88 : An15g06030, An05g00350 and A. oryzae RIB40 : AO090011000920	5.5953	0	6.73243	0	-0.599672	9.8e-08	0.537459	1.15e-07
AN7823		peroxidase activity	Putative peroxidase	1.91325	0.000127403	0.118754	0.886961	-1.02022	0.113214	-2.81471	3.32e-06
AN8395		peroxidase activity	Putative peroxidase	0.748401	0.502217	0.876931	0.435235	-0.0860825	0.954353	0.0424479	0.9758
AN7924		peroxidase activity	Has domain(s) with predicted peroxidase activity	0.921435	1.41e-07	1.33233	7.73e-16	0.141329	0.545673	0.552221	0.00154024
AN3973	tpxB	peroxidase activity	Putative peroxiredoxin	0.975015	2.74e-33	1.54627	1.29e-84	0.267483	0.00292586	0.838735	4.46e-25
AN2578		peroxidase activity	Has domain(s) with predicted peroxidase activity	0.0636304	0.780171	0.213791	0.312249	0.840513	4.89e-05	0.990673	7.24e-07
AN6457		peroxidase activity	Has domain(s) with predicted peroxidase activity	-3.40705	0.0264364	-2.18731	0.122089	0.0761243	0.956166	1.29587	0.54495
AN5440		peroxidase activity	Putative cytochrome c peroxidase	1.65442	2.4e-37	3.14446	8.85e-155	0.660672	2.41e-06	2.15072	1.45e-73
AN10223	tpxA	peroxiredoxin activity	Putative 1-Cys peroxiredoxin	-1.62846	1.31e-43	-2.55847	1.78e-103	-0.473678	0.000206571	-1.4037	5.4e-31
AN4023		peroxiredoxin activity	Has domain(s) with predicted peroxiredoxin activity and role in oxidation-reduction process	-0.912956	6.64e-13	-1.5276	1.1e-32	0.471678	0.000290383	-0.14297	0.370251
AN1252		peroxiredoxin activity	Has domain(s) with predicted peroxiredoxin activity and role in oxidation-reduction process	1.79279	5.06e-09	2.05823	1.61e-11	-0.170631	0.718476	0.0948065	0.784743
AN5232		peroxiredoxin activity	3-carboxymuconolactone hydrolase (decarboxylating), putative	1.13486	1.73e-17	2.70722	8.42e-102	0.0554407	0.774895	1.6278	6.82e-38
AN5577	sodB	superoxide dismutase activity	Manganese-superoxide dismutase	1.86532	3.94e-72	0.10514	0.975218	-14.7582	2.19e-33	-16.5184	1.45e-42
AN1131		superoxide dismutase activity	Putative cytosolic Cu/Zn superoxide dismutase	-2.96894	3.31e-71	-1.97447	3.03e-23	-1.81054	4.37e-32	-0.816068	0.000277396
AN0785	sodM	superoxide dismutase activity	Putative manganese superoxide dismutase	0.578407	0.628285	-1.56617	0.147686	1.74843	0.105105	-0.396147	0.782224
AN0241	sodA	superoxide dismutase activity	Cu/Zn-superoxide dismutase	1.44334	3.78e-63	1.5517	5.53e-73	0.193531	0.0526656	0.301898	0.00100589
AN8080		thioredoxin peroxidase activity	Ortholog(s) have thioredoxin peroxidase activity, role in cell redox homeostasis, cellular response to oxidative stress, response to metal ion and hyphal cell wall, peroxisome, plasma membrane, yeast-form cell wall localization	-1.15025	5.43e-28	-0.894395	3.5e-17	-0.438297	9.34e-05	-0.182442	0.131902
AN3687		thioredoxin peroxidase activity	Ortholog(s) have cytosol, mitochondrion, nucleus localization	0.365633	9.3e-05	0.932103	1.69e-24	-0.174692	0.104746	0.391778	4.62e-05
AN8692	prxA	thioredoxin peroxidase activity	Thioredoxin-dependent peroxidase	4.49392	0	4.7559	0	0.215359	0.0117346	0.47734	1.12e-09
AN3581	trxR	thioredoxin-disulfide reductase activity	Thioredoxin reductase with a predicted role in pyrimidine metabolism	4.44739	0	5.78332	0	-0.528114	2.59e-05	0.807819	1.16e-11
AN0170	trxA	protein-disulfide reductase activity	Thioredoxin; predicted role in cell redox homeostasis; required for conidiation; expression upregulated after exposure to farnesol	2.63009	1.13826e-100	3.42511	7.0911e-170	-1.0156	3.48967e-15	-0.220579	0.114131
DEG, log2FC>0
upregulated (group):				22		19		7		16
upregulated (genome):				3763		3974		2395		3289
p				0.000500062		0.0214904		0.666632		0.0349426
DEG, log2FC>1
upregulated (group):				17		18		0		3
upregulated (genome):				2235		2655		279		691
p				0.000171051		0.000437919		1		0.379318
DEG, log2FC>2
upregulated (group):				11		13		0		1
upregulated (genome):				1028		1360		66		120
p				0.000230665		0.000159813		1		0.319506
DEG, log2FC<0
downregulated (group):				7		5		12		10
downregulated (genome):				3795		4046		2017		2503
p				0.980742		0.999221		0.018241		0.26154
DEG, log2FC<-1
downregulated (group):				5		3		6		3
downregulated (genome):				2220		2758		529		1050
p				0.863352		0.996818		0.00596343		0.663184
DEG, log2FC<-2
downregulated (group):				2		1		1		1
downregulated (genome):				929		1292		113		269
p				0.808221		0.987542		0.303972		0.580574
Total number of genes (group):				35		35		35		35
Total number of genes (genome):				10988		10988		10988		10988
Respiration genes
GENE ID	Gene name	Description	Product	THS30.3: MSB treated vs. untreated		DsodB: MSB treated vs. untreated		Untreated: DsodB vs. THS30.3		MSB treated: DsodBvs. THS30.3
				log2FC	p adj.	log2FC	p adj.	log2FC	p adj.	log2FC	p adj.
AN1063		Putative NADH dehydrogenase (ubiquinone) with a predicted role in energy metabolism	NADH dehydrogenase	-1.17363	1.59e-25	-0.870146	5.16e-15	0.725146	3.63e-10	1.02863	5.4e-19
AN10660	ndiA	Putative NADH dehydrogenase	NADH dehydrogenase	0.276411	0.591326	1.12637	0.0133448	-0.275575	0.6522	0.574382	0.26578
AN1094	ndiF	Putative mitochondrial NADH dehydrogenase (ubiquinone) with a predicted role in energy metabolism	NADH dehydrogenase	-0.709865	6.39e-05	-1.44709	1.09e-16	0.143802	0.536016	-0.593423	0.00140783
AN11251		Has domain(s) with predicted 4 iron, 4 sulfur cluster binding, NADH dehydrogenase (ubiquinone) activity, oxidoreductase activity, acting on NAD(P)H, quinone binding activity and role in oxidation-reduction process	NADH dehydrogenase	3.12658	1.48e-36	2.32655	1.18e-24	0.494191	0.128657	-0.305838	0.17148
AN11377		Has domain(s) with predicted NADH dehydrogenase (ubiquinone) activity and mitochondrion localization	NADH dehydrogenase	-1.39603	1.2e-23	-1.09236	3.34e-15	0.257805	0.108198	0.561471	0.000170267
AN11487		Ortholog(s) have NADH dehydrogenase (ubiquinone) activity and role in mitochondrial respiratory chain complex I assembly, programmed cell death	NADH dehydrogenase	0.145914	0.153391	0.301796	0.00182916	0.510598	3.52e-07	0.66648	9.11e-12
AN20007	ndhA	Mitochondrially encoded subunit 1 of NADH dehydrogenase	NADH dehydrogenase	1.43137	0.0110809	2.79454	6.64e-08	2.13098	0.000241207	3.49415	6.56e-11
AN20002	ndhB	Mitochondrially encoded subunit 2 of NADH dehydrogenase	NADH dehydrogenase	0.891914	0.311074	0.827152	0.309618	2.08442	0.0172428	2.01966	0.0147234
AN20018	ndhC	Mitochondrially encoded subunit 3 of NADH dehydrogenase	NADH dehydrogenase	1.25525	4.57e-08	1.21931	9.59e-08	0.347109	0.209102	0.311169	0.234264
AN20008	ndhD	Mitochondrially encoded subunit 4 of NADH dehydrogenase	NADH dehydrogenase	1.60823	0.0053862	2.77708	2.49e-08	2.40203	4.13e-05	3.57087	8.84e-12
AN20000	ndhDL	Mitochondrially encoded subunit 4L of NADH dehydrogenase	NADH dehydrogenase	0.338618	0.80165	1.48208	0.207183	-0.299225	0.855822	0.84424	0.523502
AN20001	ndhE	Mitochondrially-encoded subunit 5 of NADH dehydrogenase	NADH dehydrogenase	1.91011	0.00181363	0.721978	0.093373	2.69788	6.74e-06	1.50974	0.00167407
AN20011	ndhF	Mitochondrially encoded subunit 6 of NADH dehydrogenase	NADH dehydrogenase	2.35151	0.00232887	0.801398	0.164672	2.33125	0.00388871	0.781138	0.228375
AN2414	ndiD	Putative NADH dehydrogenase (ubiquinone) with a predicted role in energy metabolism	NADH dehydrogenase	-0.423004	3.56e-07	-0.00812376	0.948459	0.257081	0.00436418	0.671962	1.41e-15
AN5629	ndiA	Putative NADH dehydrogenase (ubiquinone) with a predicted role in energy metabolism	NADH dehydrogenase	-0.841336	4.68e-19	-0.476188	4.46e-07	0.453499	4.84e-06	0.818647	2.77e-17
AN6077		Putative NADH dehydrogenase (ubiquinone) with a predicted role in energy metabolism	NADH dehydrogenase	-1.02005	5.38e-24	-0.946656	4.77e-21	0.363336	0.00083549	0.43673	4.7e-05
AN7500	ndeA	Putative NADH dehydrogenase (ubiquinone) with a predicted role in energy metabolism	NADH dehydrogenase	1.95204	7.7e-129	2.57691	6.7e-224	-0.236484	0.0100609	0.388386	4.09e-06
AN7629		Has domain(s) with predicted NADH dehydrogenase (ubiquinone) activity, role in electron transport chain and mitochondrial respiratory chain complex I localization	NADH dehydrogenase	0.336719	0.00293958	0.608735	2.76e-08	0.749562	5.02e-11	1.02158	4.26e-20
AN9078		Has domain(s) with predicted NADH dehydrogenase (ubiquinone) activity and mitochondrion localization	NADH dehydrogenase	0.0148328	0.914381	0.580319	2.32e-07	0.22218	0.0875719	0.787667	6.98e-12
AN0357		Putative ubiquinol-cytochrome-c reductase subunit with a predicted role in energy metabolism	ubiquinol-cytochrome-c reductase	-1.42012	2.65e-39	-1.24525	9.75e-31	0.374968	0.00153415	0.549841	1.37e-06
AN0747		Putative ubiquinol-cytochrome-c reductase subunit with a predicted role in energy metabolism	ubiquinol-cytochrome-c reductase	-1.00705	1.59e-37	-0.852679	1.85e-27	0.287075	0.000780989	0.441449	8.39e-08
AN12213		Ortholog(s) have ubiquinol-cytochrome-c reductase activity, role in aerobic respiration, mitochondrial electron transport, ubiquinol to cytochrome c and mitochondrial respiratory chain complex III, plasma membrane localization	ubiquinol-cytochrome-c reductase	-0.054458	0.66504	-0.256311	0.0231453	0.823624	2.7e-13	0.621771	3.36e-08
AN2306		Putative ubiquinol-cytochrome-c reductase subunit with a predicted role in energy metabolism	ubiquinol-cytochrome-c reductase	-0.652256	2.97e-14	-0.485188	1.59e-08	0.335143	0.000271257	0.502211	1.62e-08
AN4388		Putative ubiquinol-cytochrome-c reductase subunit with a predicted role in energy metabolism	ubiquinol-cytochrome-c reductase	-0.547726	5.62e-07	-0.931213	5.74e-18	0.757608	1.49e-11	0.374122	0.00115774
AN5597		Putative ubiquinol-cytochrome-c reductase subunit with a predicted role in energy metabolism	ubiquinol-cytochrome-c reductase	-1.0086	1.82e-17	-0.665825	2.16e-08	0.39323	0.00244998	0.736005	1.88e-09
AN8273		Putative ubiquinol-cytochrome-c reductase subunit with a predicted role in energy metabolism	ubiquinol-cytochrome-c reductase	-1.02514	1.19e-22	-1.01459	2.88e-22	0.172296	0.168571	0.182845	0.122622
AN6246	cycA	Cytochrome c	cytochrome-c	-0.55442	1.35e-06	-0.685879	1.53e-09	1.20473	2.76e-25	1.07327	1.21e-20
AN10553		Has domain(s) with predicted cytochrome-c oxidase activity	cytochrome-c oxidase	-0.331108	0.00269015	-0.515724	1.89e-06	0.103942	0.452923	-0.0806739	0.53763
AN10582		Has domain(s) with predicted FAD binding, cytochrome-c oxidase activity, oxidoreductase activity, role in metabolic process and mitochondrial respiratory chain complex IV localization	cytochrome-c oxidase	1.04489	7.29e-13	2.0502	4e-61	0.831762	2.6e-08	1.83707	2.03e-45
AN10585		Ortholog(s) have cytochrome-c oxidase activity, enzyme regulator activity, role in aerobic respiration, mitochondrial respiratory chain supercomplex assembly and mitochondrial respiratory chain complex IV, plasma membrane localization	cytochrome-c oxidase	0.175864	0.0624747	0.0813577	0.416988	-0.347618	0.000342635	-0.442124	2.14e-06
AN11347		Ortholog(s) have cytochrome-c oxidase activity, role in mitochondrial electron transport, cytochrome c to oxygen and mitochondrial respiratory chain complex IV, plasma membrane localization	cytochrome-c oxidase	0.260519	0.00412456	-0.0863145	0.376782	0.256425	0.00884804	-0.0904077	0.385255
AN20014	oxiA	Subunit I of cytochrome c oxidase, which is the terminal member of the mitochondrial inner membrane electron transport chain	cytochrome-c oxidase	1.32518	1.17e-12	0.97501	8.13e-08	1.22846	2.05e-10	0.878291	3.45e-06
AN20019	oxiB	Subunit II of cytochrome c oxidase, which is the terminal member of the mitochondrial inner membrane electron transport chain	cytochrome-c oxidase	1.15352	0.00026903	1.26153	5.91e-05	0.494013	0.185611	0.602017	0.0801964
AN20012	oxiC	Subunit III of cytochrome c oxidase, which is the terminal member of the mitochondrial inner membrane electron transport chain	cytochrome-c oxidase	1.66995	1.35e-05	0.407815	0.269801	1.73417	1.17e-05	0.472032	0.238722
AN2316		Putative cytochrome c oxidase subunit with a predicted role in energy metabolism	cytochrome-c oxidase	-0.446858	1.25e-07	-0.371125	1.2e-05	-0.0558505	0.624444	0.0198822	0.856742
AN4525		Putative cytochrome c oxidase subunit with a predicted role in energy metabolism	cytochrome-c oxidase	-0.187057	0.0162461	-0.0409663	0.641831	-0.147971	0.0899327	-0.00188006	0.986459
AN6255		Putative cytochrome c oxidase subunit with a predicted role in energy metabolism	cytochrome-c oxidase	0.0957387	0.293374	-0.252756	0.00307055	0.208548	0.0268858	-0.139947	0.136237
AN8118		Putative cytochrome c oxidase subunit with a predicted role in energy metabolism	cytochrome-c oxidase	-0.519575	1.15e-11	-0.366699	1.94e-06	-0.0162081	0.884303	0.136668	0.111475
AN2099	aoxA/aodA	Putative alternative oxidase	alternative oxidase	1.40005	2.17e-06	1.38599	2.56e-06	-0.129543	0.755757	-0.143594	0.696868
DEG, log2FC>0
upregulated (group):				14		13		23		22
upregulated (genome):				3763		3974		2395		3289
p				0.247758		0.46454		1.24739e-08		2.84003e-05
DEG, log2FC>1
upregulated (group):				12		9		8		8
upregulated (genome):				2235		2655		279		691
p				0.0307732		0.441053		1.59886e-06		0.000987515
DEG, log2FC>2
upregulated (group):				2		5		5		3
upregulated (genome):				1028		1360		66		120
p				0.84059		0.414293		1.63018e-06		0.00593964
DEG, log2FC<0
downregulated (group):				17		17		2		2
downregulated (genome):				3795		4046		2017		2503
p				0.045277		0.0798423		0.99132		0.998339
DEG, log2FC<-1
downregulated (group):				7		4		0		0
downregulated (genome):				2220		2758		529		1050
p				0.545868		0.98389		1		1
DEG, log2FC<-2
downregulated (group):				0		0		0		0
downregulated (genome):				929		1292		113		269
p				1		1		1		1
Total number of genes (group):				39		39		39		39
Total number of genes (genome):				10988		10988		10988		10988
Sterigmatocystin cluster genes
GENE ID	Description	Product	THS30.3: MSB treated vs. untreated		DsodB: MSB treated vs. untreated		Untreated: DsodB vs. THS30.3		MSB treated: DsodBvs. THS30.3
			log2FC	p adj.	log2FC	p adj.	log2FC	p adj.	log2FC	p adj.
AN7804	Sterigmatocystin (stc) cluster		-0.434633	0.411676	-3.92053	0.000540331	-0.220707	0.724947	-3.70661	0.00192959
AN7805	Sterigmatocystin (stc) cluster		-0.856638	2.16e-07	-2.71272	2.73e-28	-1.42446	2.41e-17	-3.28054	1.61e-39
AN7823	Sterigmatocystin (stc) cluster		1.91325	0.000127403	0.118754	0.886961	-1.02022	0.113214	-2.81471	3.32e-06
AN7807	Sterigmatocystin (stc) cluster		1.84267	NA	0.105168	0.991083	-0.287653	NA	-2.02516	NA
AN7806	Sterigmatocystin (stc) cluster		-1.56661	0.00999003	-2.22804	0.0153455	-1.14395	0.0625555	-1.80538	0.0777577
AN11013	Sterigmatocystin (stc) cluster		0.447363	0.643547	-1.43983	0.229397	0.0954728	0.938556	-1.79172	0.157635
AN7822	Sterigmatocystin (stc) cluster		-2.64081	1.7e-27	-3.5615	1.69e-30	-0.868801	0.000395276	-1.78948	1.06e-07
AN7820	Sterigmatocystin (stc) cluster	transcription factor	0.626683	0.387824	-0.324793	0.75357	-0.638509	0.479363	-1.58999	0.0828235
AN7812	Sterigmatocystin (stc) cluster		1.30175	NA	-1.24988	0.679732	1.06739	NA	-1.48424	NA
AN7814	Sterigmatocystin (stc) cluster	polyketide synthase	-0.0353811	0.893677	-0.501387	0.075059	-1.00634	2.07e-05	-1.47235	6.63e-08
AN7817	Sterigmatocystin (stc) cluster		0.38831	0.480433	-0.916278	0.155822	-0.1468	0.836656	-1.45139	0.0282026
AN7821	Sterigmatocystin (stc) cluster		-0.220086	0.748068	-1.15651	0.118107	-0.284024	0.720087	-1.22045	0.128034
AN7816	Sterigmatocystin (stc) cluster		0.814827	1.01e-08	0.343177	0.0365019	-0.394906	0.0162624	-0.866556	3.8e-08
AN11021	Sterigmatocystin (stc) cluster		0.178637	0.57115	0.320331	0.362923	-0.907219	0.00387215	-0.765525	0.0231665
AN7808	Sterigmatocystin (stc) cluster		-1.10218	NA	-0.627072	0.851498	-1.03707	NA	-0.561967	NA
AN7824	Sterigmatocystin (stc) cluster		0.00252777	0.995044	-0.423767	0.220646	0.000956365	0.999017	-0.425338	0.271676
AN7825	Sterigmatocystin (stc) cluster	polyketide synthase	-0.273706	0.455585	-0.746216	0.0345258	0.262598	0.518043	-0.209912	0.636102
AN7819	Sterigmatocystin (stc) cluster		0.618143	0.0138975	0.901205	0.000471914	-0.396927	0.183052	-0.113865	0.716137
AN7815	Sterigmatocystin (stc) cluster		0.69605	5.4e-07	1.36709	8.27e-21	-0.771117	5.2e-07	-0.10008	0.555963
AN7818	Sterigmatocystin (stc) cluster		-0.551102	0.0395097	0.0708787	0.837954	-0.71525	0.00886829	-0.0932688	0.798983
AN11017	Sterigmatocystin (stc) cluster		-0.582308	NA	0	1	-1.2494	NA	0	NA
AN7811	Sterigmatocystin (stc) cluster		3.50409	0.102806	3.54945	0.093177	0.674142	NA	0.719502	0.744649
AN12090	Sterigmatocystin (stc) cluster		0.285691	0.914381	1.72438	0.46124	-0.367469	NA	1.07122	NA
AN7809	Sterigmatocystin (stc) cluster		0	NA	-0.182026	0.987495	1.92312	NA	1.36161	NA
AN12089	Sterigmatocystin (stc) cluster		NA	NA	NA	NA	NA	NA	NA	NA
AN7810	Sterigmatocystin (stc) cluster		NA	NA	NA	NA	NA	NA	NA	NA
DEG, log2FC>0
upregulated (group):			4		3		0		0
upregulated (genome):			3763		3974		2395		3289
p			0.99139		0.998986		1		1
DEG, log2FC>1
upregulated (group):			1		1		0		0
upregulated (genome):			2235		2655		279		691
p			0.997315		0.999254		1		1
DEG, log2FC>2
upregulated (group):			0		0		0		0
upregulated (genome):			1028		1360		66		120
p			1		1		1		1
DEG, log2FC<0
downregulated (group):			4		5		7		8
downregulated (genome):			3795		4046		2017		2503
p			0.992052		0.984647		0.186592		0.22432
DEG, log2FC<-1
downregulated (group):			2		4		2		6
downregulated (genome):			2220		2758		529		1050
p			0.97866		0.921711		0.358262		0.0326788
DEG, log2FC<-2
downregulated (group):			1		4		0		3
downregulated (genome):			929		1292		113		269
p			0.899688		0.366093		1		0.0248941
Total number of genes (group):			26		26		26		26
Total number of genes (genome):			10988		10988		10988		10988
